# Supplementary material for: Lewis acid-catalyzed diastereoselective formal ene reaction of thioindolinones/thiolactams with bicyclobutanes
Source: Royal Society of Chemistry journal article supplement (doi:10.1039/d4sc02194k), 2024-01-01

# Lewis acid-catalyzed diastereoselective formal ene reaction of thioindolinones/thiolactams with bicyclobutanes

Avishek Guin,\* Shiksha Deswal, Mahesh Singh Harariya and Akkattu T. Biju\*

*Department of Organic Chemistry, Indian Institute of Science, Bangalore-560012, India*

Email: [avishekguin@iisc.ac.in](mailto:avishekguin@iisc.ac.in) ; [atbiju@iisc.ac.in](mailto:atbiju@iisc.ac.in)

## Supporting Information

|                                                                                                     |     |
|-----------------------------------------------------------------------------------------------------|-----|
| 1. General Information                                                                              | S02 |
| 2. General Procedure for the Optimization of the Reaction Conditions                                | S02 |
| 3. General Procedure for the Lewis Acid-Catalyzed Ene Reaction of Thioindolinones with Bicyobutanes | S03 |
| 4. General Procedure for the Reaction of Thiones with BCBs                                          | S04 |
| 5. Mechanistic Studies                                                                              | S05 |
| 6. X-ray Data of <b>8</b>                                                                           | S10 |
| 7. DFT Studies                                                                                      | S11 |
| 8. Synthesis and Characterization of Substituted Cyclobutane Derivatives                            | S42 |
| 9. Product Functionalization                                                                        | S59 |
| 10. <sup>1</sup> H and <sup>13</sup> C NMR Spectra of Products                                      | S65 |

## 1. General Information

Unless otherwise specified, all reactions were carried out under an atmosphere of nitrogen in oven-dried reaction vessels with Teflon screw caps. 25 °C corresponds to the room temperature (rt) of the lab when the experiments were carried out. CH<sub>2</sub>Cl<sub>2</sub> was freshly purified by distillation over CaH<sub>2</sub> under nitrogen atmosphere. BCBs were prepared following the reported literature procedures.<sup>1</sup> All thioindolinone and other thione derivatives were prepared from the corresponding amides following the literature procedure.<sup>2</sup>

Analytical thin layer chromatography was performed on TLC Silica gel 60 F<sub>254</sub>. All the isolated new compounds were confirmed to be single spot on TLC. Visualization was accomplished with short wave UV light or KMnO<sub>4</sub> staining solutions followed by heating. Flash chromatography was performed on silica gel (230-400 mesh) by standard techniques eluting with Pet. Ether-EtOAc solvent system.

All compounds were fully characterized. <sup>1</sup>H and <sup>13</sup>C NMR spectra were recorded on Bruker Ultrashield spectrometer in CDCl<sub>3</sub> as solvent. Chemical shifts (δ) are given in ppm. The residual solvent signals were used as references and the chemical shifts converted to the TMS scale (CDCl<sub>3</sub>: δ<sub>H</sub> = 7.26 ppm, δ<sub>C</sub> = 77.16 ppm). Infrared (FT-IR) spectra were recorded on a Bruker Alfa FT-IR, ν-max in cm<sup>-1</sup>. HRMS (ESI) data were recorded on a Waters Xevo G2-XS Q-TOF instrument.

## 2. General Procedure for the Optimization of the Reaction Conditions

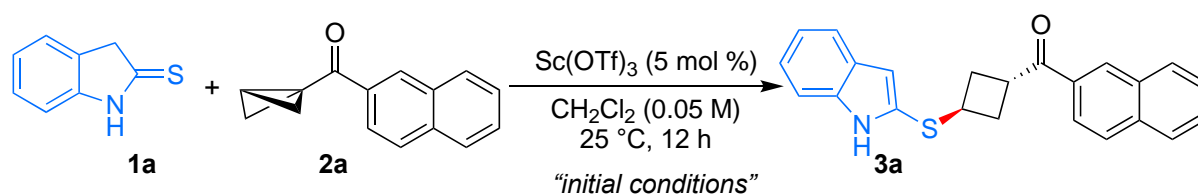

To an oven-dried screw-capped test tube equipped with a magnetic stir bar was added Sc(OTf)<sub>3</sub> (0.002 g, 0.005 mmol) inside the glove box. After that, indoline-2-thione **1a** (0.015 g, 0.1 mmol) and 1.5 mL CH<sub>2</sub>Cl<sub>2</sub> were added outside the glove box under nitrogen atmosphere

<sup>1</sup> (a) K. Dhake, K. J. Woelk, J. Becia, A. Un, S. E. Jenny and D. C. Leitch, *Angew. Chem., Int. Ed.*, 2022, **61**, e202204719; (b) R. Guo, Y. Chang, L. Herter, C. Salome, S. E. Braley, T. C. Fessard and M. K. Brown, *J. Am. Chem. Soc.*, 2022, **144**, 7988.

<sup>2</sup> B. Gopal, P. R. Singh, M. Kumar and A. Goswami, *J. Org. Chem.*, 2023, **88**, 132.

at 25 °C and stirred for 5 minutes. After 5 minutes, bicyclo[1.1.0]butan-1-yl(naphthalene-2-yl)methanone **2a** (0.025 g, 0.12 mmol) and 0.5 mL CH<sub>2</sub>Cl<sub>2</sub> was added subsequently. Then, the reaction mixture was stirred for 12 h. After 12 h, the reaction was stopped, the solvent was evaporated, and the crude mixture was passed through a pad of silica gel and eluted with EtOAc (3x10 mL). The reaction mixture was concentrated under reduced pressure and then the yield of **3a** was determined by the <sup>1</sup>H NMR analysis of the crude reaction mixture using CH<sub>2</sub>Br<sub>2</sub> as the internal standard.

**Table S1.** Optimization Studies

| entry           | variation of the initial conditions <sup>a</sup>     | yield of <b>3a</b> (%) <sup>b</sup> | dr <sup>c</sup> |
|-----------------|------------------------------------------------------|-------------------------------------|-----------------|
| 1               | none                                                 | 63                                  | >20:1           |
| 2               | Bi(OTf) <sub>3</sub> instead of Sc(OTf) <sub>3</sub> | 40                                  | >20:1           |
| 3               | Cu(OTf) <sub>2</sub> instead of Sc(OTf) <sub>3</sub> | 60                                  | 2:1             |
| 4               | TMSOTf instead of Sc(OTf) <sub>3</sub>               | 47                                  | 1:1             |
| 5               | 10 mol % Sc(OTf) <sub>3</sub> instead of 5 mol %     | 62                                  | >20:1           |
| 6               | 1.4 equiv of <b>2a</b>                               | 57                                  | >20:1           |
| 7               | 1.2 equiv of <b>1a</b>                               | 51                                  | >20:1           |
| 8               | 0 °C instead of 25 °C                                | 71                                  | >20:1           |
| 9               | 0 °C to rt instead of 25 °C                          | 71 (70)                             | >20:1           |
| 10 <sup>d</sup> | DCE instead of CH <sub>2</sub> Cl <sub>2</sub>       | 60                                  | >20:1           |
| 11 <sup>d</sup> | THF instead of CH <sub>2</sub> Cl <sub>2</sub>       | 69                                  | 1:1             |

<sup>a</sup> Initial conditions: **1a** (0.10 mmol), **2a** (0.12 mmol), Sc(OTf)<sub>3</sub> (5 mol %), CH<sub>2</sub>Cl<sub>2</sub> (2.0 mL), 25 °C for 12 h. <sup>b</sup> The <sup>1</sup>H NMR yield of the crude products was determined using CH<sub>2</sub>Br<sub>2</sub> as the internal standard and the isolated yield was given in parenthesis. <sup>c</sup> dr value was determined from <sup>1</sup>H NMR of the crude reaction mixture. <sup>d</sup> The reaction was performed at 0 °C to rt.

### 3. General Procedure for the Lewis Acid-Catalyzed Ene Reaction of Thioindolinones with Bicyobutanes

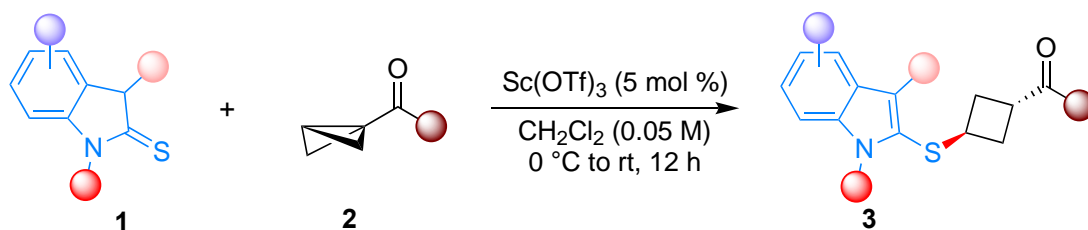

To an oven-dried screw-capped test tube equipped with a magnetic stir bar was added Sc(OTf)<sub>3</sub> (0.005 g, 0.01 mmol) inside the glove box. After that, thioindolinones **1** (0.2 mmol) and 3.0 mL CH<sub>2</sub>Cl<sub>2</sub> were added outside the glove box under nitrogen atmosphere. Then the reaction mixture was cooled at 0 °C and stirred for 5 minutes. After 5 minutes, BCBs **2** (0.24 mmol) and 1.0 mL CH<sub>2</sub>Cl<sub>2</sub> were added subsequently. Then, the reaction mixture was slowly warmed to rt while stirring for 12 h. After 12 h, the solvent was evaporated, and the crude

residue was pre-adsorbed on silica gel and purified by flash column chromatography on silica gel (Pet.ether-EtOAc as eluent) to afford **3** in good to excellent yields.

#### *Procedure for the 2.0 mmol Scale Reaction for the synthesis of 3a*

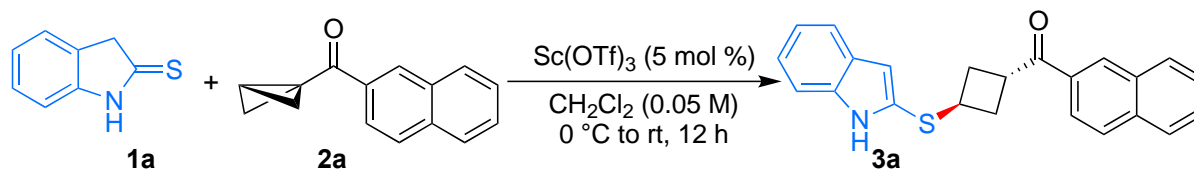

To an oven-dried screw-capped test tube equipped with a magnetic stir bar was added Sc(OTf)<sub>3</sub> (0.049 g, 0.1 mmol) inside the glove box. After that, indoline-2-thione **1a** (0.298 g, 2.0 mmol) and 30 mL CH<sub>2</sub>Cl<sub>2</sub> were added outside the glove box under nitrogen atmosphere. Then, the reaction mixture was cooled at 0 °C and stirred for 5 minutes. After 5 minutes, bicyclo[1.1.0]butan-1-yl(naphthalene-2-yl)methanone **2a** (0.500 g, 2.4 mmol) and 10 mL CH<sub>2</sub>Cl<sub>2</sub> were added subsequently. Then, the reaction mixture was slowly warmed to rt while stirring for 12 h. After 12 h, the solvent was evaporated, and the crude residue pre-adsorbed on silica gel and purified by flash column chromatography (Pet. ether /EtOAc = 90/10) on silica gel to afford **3a** as a purple solid (0.515 g, 72% yield).

#### **4. General Procedure for the Reaction of Thiones with BCBs**

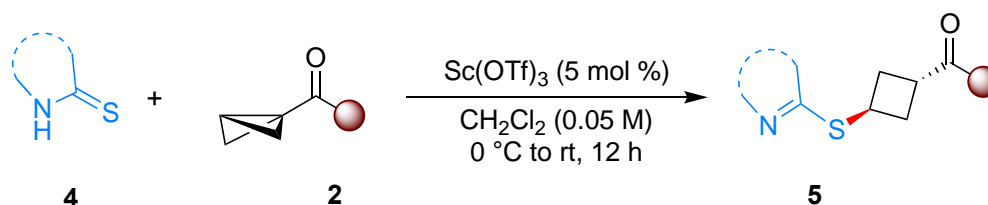

To an oven-dried screw-capped test tube equipped with a magnetic stir bar was added Sc(OTf)<sub>3</sub> (0.005 g, 0.01 mmol) inside the glove box. After that, thiones **4** (0.2 mmol) and 3.0 mL CH<sub>2</sub>Cl<sub>2</sub> were added outside the glove box under a nitrogen atmosphere. Then, the reaction mixture was cooled at 0 °C and stirred for 5 minutes. After 5 minutes, BCBs **2** (0.24 mmol) and 1.0 mL CH<sub>2</sub>Cl<sub>2</sub> were added subsequently. Then, the reaction mixture was slowly warmed to rt while stirring for 12 h. After 12 h, the solvent was evaporated, and the crude residue was pre-adsorbed on silica gel and purified by flash column chromatography on silica gel (Pet.ether-EtOAc as eluent) to afford **5** in good to excellent yields and single diastereomeric ratio.

### Procedure for the 1.0 mmol Scale Reaction for the synthesis of **5a**

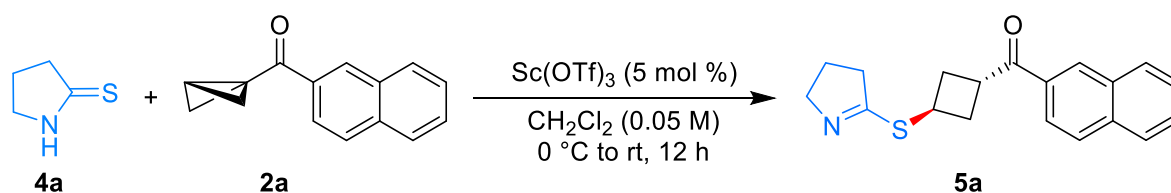

To an oven-dried screw-capped test tube equipped with a magnetic stir bar was added  $\text{Sc}(\text{OTf})_3$  (0.025 g, 0.05 mmol) inside the glove box. After that, pyrrolidine-2-thione **4a** (0.101 g, 1.0 mmol) and 15 mL  $\text{CH}_2\text{Cl}_2$  were added outside the glove box under nitrogen atmosphere. Then, the reaction mixture was cooled at  $0^\circ\text{C}$  and stirred for 5 minutes. After 5 minutes, bicyclo[1.1.0]butan-1-yl(naphthalene-2-yl)methanone **2a** (0.250 g, 1.2 mmol) and 5 mL  $\text{CH}_2\text{Cl}_2$  were added subsequently. Then, the reaction mixture was slowly warmed to rt while stirring for 12 h. After 12 h, the solvent was evaporated, and the crude residue pre-adsorbed on silica gel and purified by flash column chromatography (Pet. ether /EtOAc = 90/10) on silica gel to afford **5a** as a white solid (0.204 g, 66% yield).

## 5. Mechanistic Studies

### Epimerization of the product **3a**

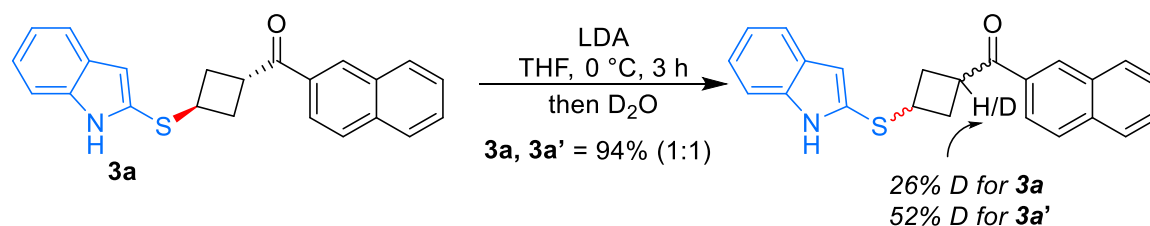

To an oven-dried screw-capped test tube equipped with a magnetic stir bar was added **3a** (0.036 g, 0.1 mmol) in 1.0 mL THF under nitrogen atmosphere at  $0^\circ\text{C}$ . Then, the reaction mixture was stirred for 5 minutes at  $0^\circ\text{C}$ . After 5 minutes, LDA (0.3 mL, 1 M solution in THF) was added and then the reaction mixture was stirred for 3 hour while maintaining the same temperature. After 3 h, the reaction was quenched with  $\text{D}_2\text{O}$  (0.020 g, 1.0 mmol) and stirred for 15 minutes. After 15 min, and the crude residue pre-adsorbed on silica gel and purified by flash column chromatography (Pet. ether /EtOAc = 90/10) on silica gel to afford **3a** and **3a'** in 94% isolated yield with 1:1 separable dr.

*This study reveals that the proton adjacent to the 2-naphthyl ketone exhibits acidity and is susceptible to deprotonation by LDA. Furthermore, following the deprotonation and subsequent re-protonation, both diastereomers were formed in equal proportions, suggesting that the observed diastereoselectivity in the described ene reaction is not governed by*

thermodynamic parameters. If thermodynamic parameters were decisive in determining diastereoselectivity, then minimal change would be expected in diastereoselectivity after the deprotonation and re-protonation steps (Scheme 4 of the manuscript, eq 4).

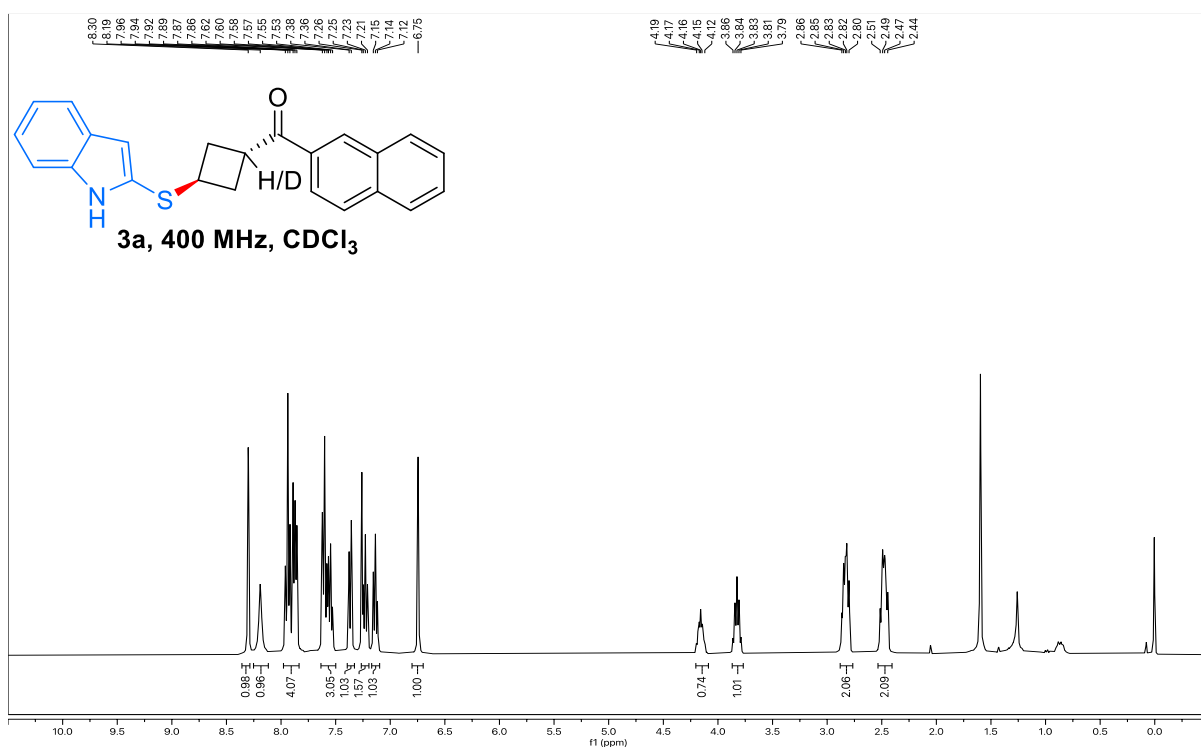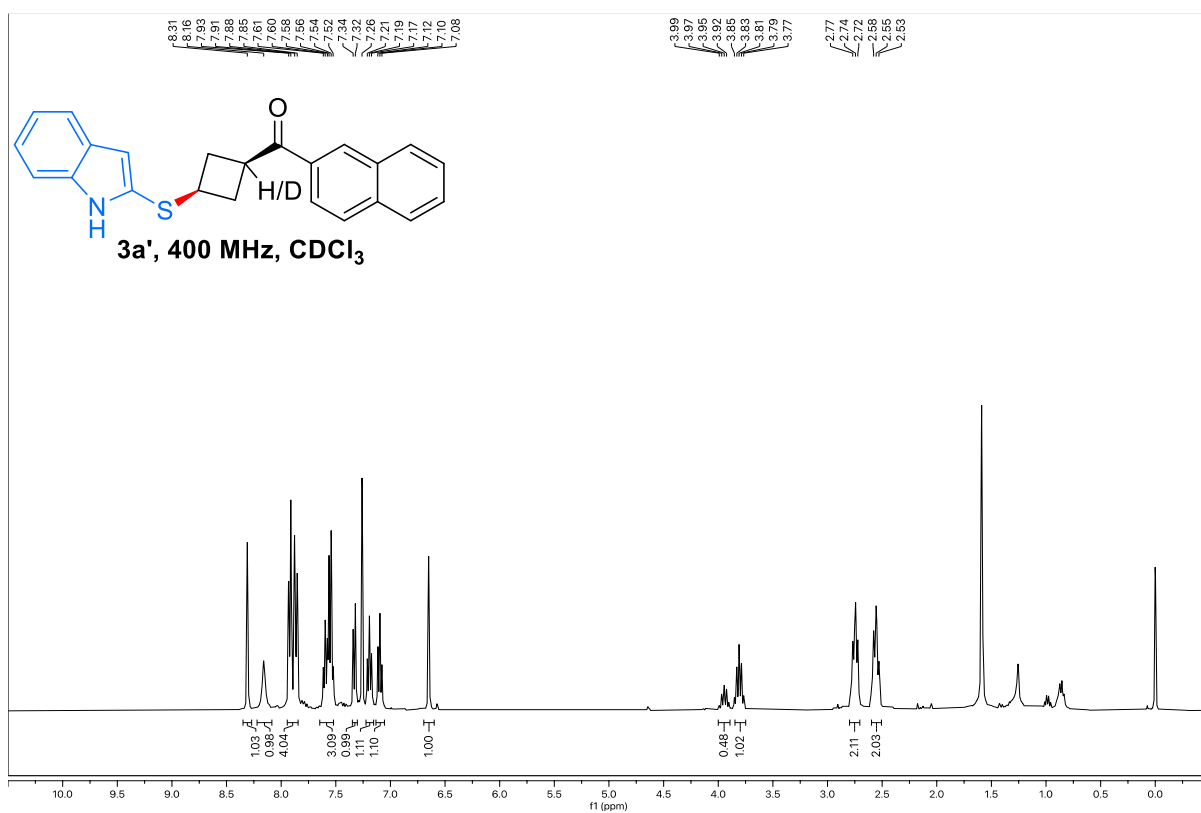

## Reaction in the presence of D<sub>2</sub>O

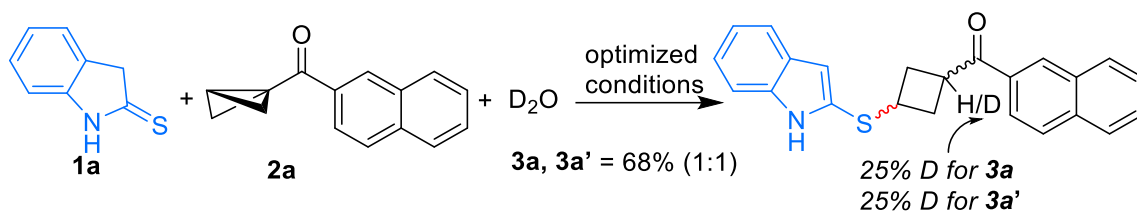

To an oven-dried screw-capped test tube equipped with a magnetic stir bar was added Sc(OTf)<sub>3</sub> (0.005 g, 0.01 mmol) inside the glove box. After that, indoline-2-thione **1a** (0.030 g, 0.2 mmol) and 3.0 mL CH<sub>2</sub>Cl<sub>2</sub> were added outside the glove box under nitrogen atmosphere. Then the reaction mixture was cooled at 0 °C and stirred for 5 minutes. After 5 minutes, bicyclo[1.1.0]butan-1-yl(naphthalen-2-yl)methanone **2a** (0.050 g, 0.24 mmol), D<sub>2</sub>O (0.016 g, 0.8 mmol) and 1.0 mL CH<sub>2</sub>Cl<sub>2</sub> were added subsequently. Then, the reaction mixture was slowly warmed to rt while stirring for 12 h. After 12 h, the solvent was evaporated, and the crude residue was pre-adsorbed on silica gel and purified by flash column chromatography on silica gel (Pet.ether-EtOAc as eluent) to afford **3a** and **3a'** in 68% isolated yield with 1:1 separable dr.

*The findings of this study suggest that the introduction of an external proton source can modify the diastereoselectivity of the product. Given that the presence of such a proton source can influence diastereoselectivity, it is likely that intramolecular proton transfer occurs under the optimized reaction conditions, possibly originating from the same side of the thioindolinones (Scheme 4 of the manuscript, eq 5).*

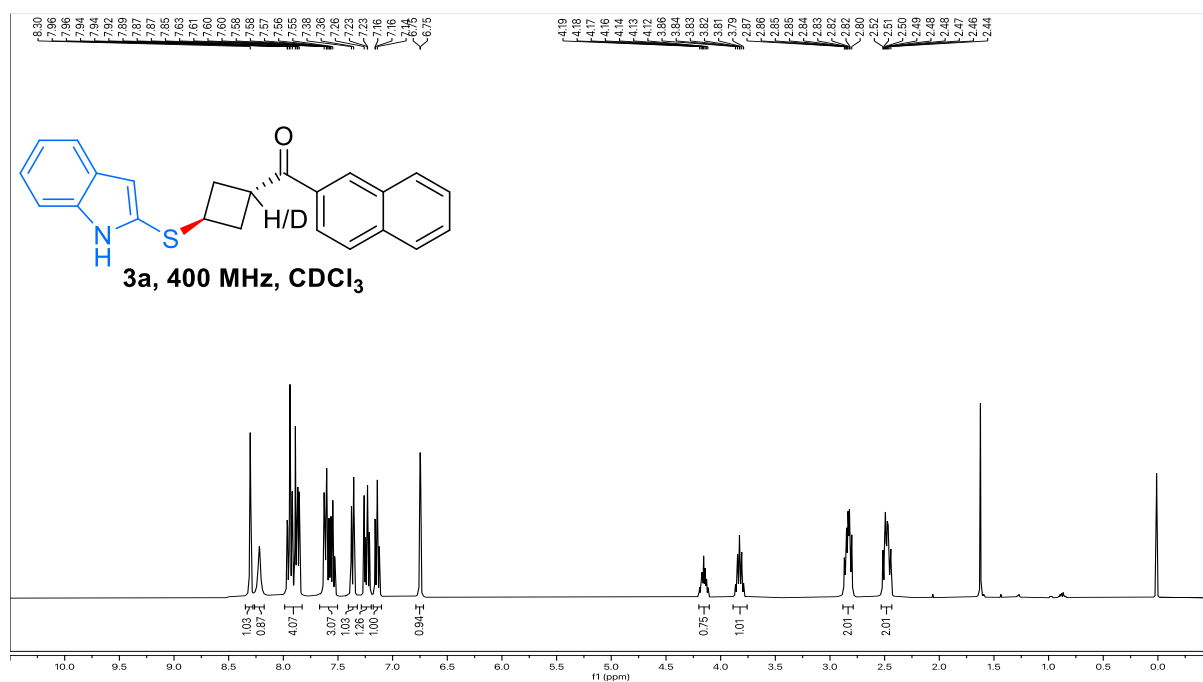

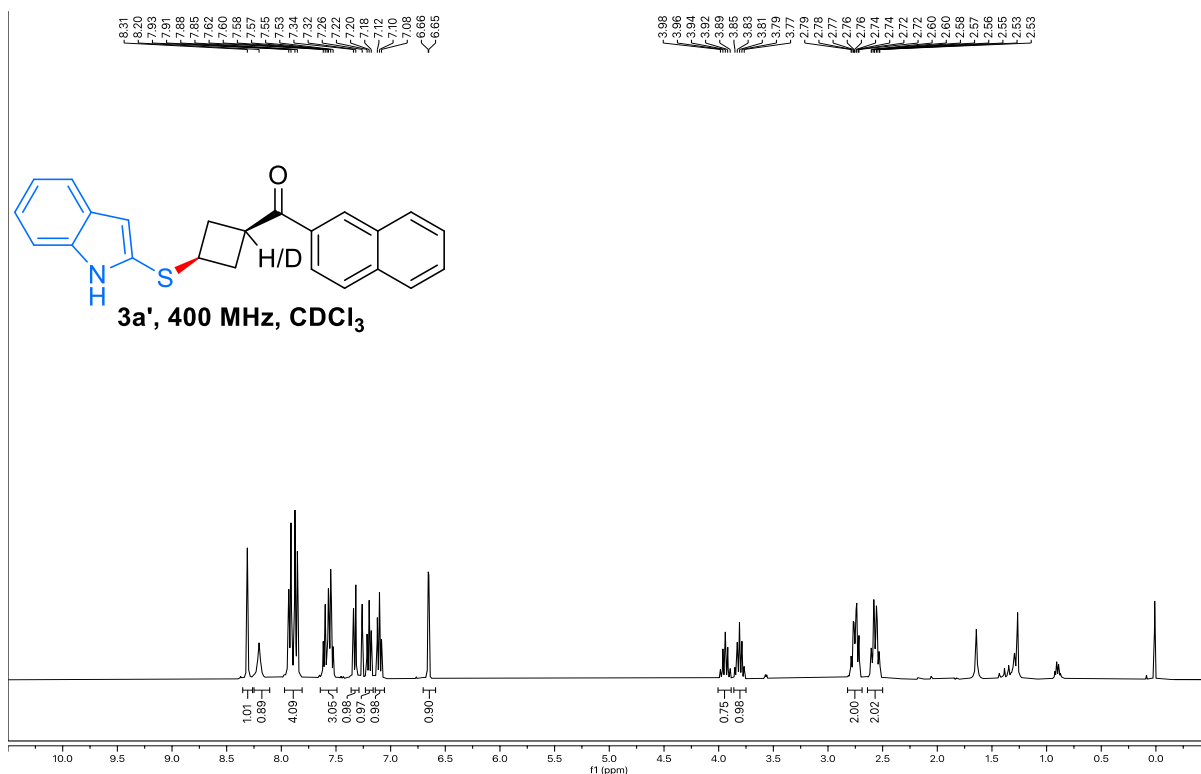

#### Reaction with 3,3-dimethylindoline-2-thione

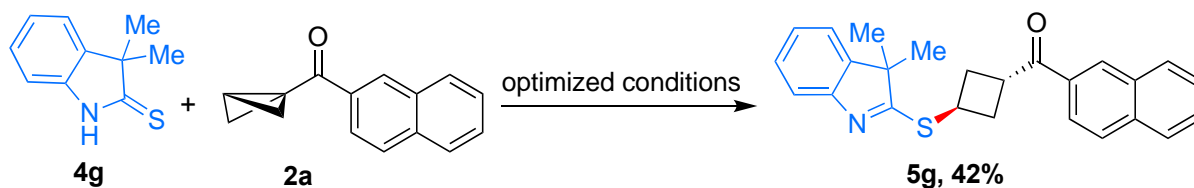

To an oven-dried screw-capped test tube equipped with a magnetic stir bar was added Sc(OTf)<sub>3</sub> (0.005 g, 0.01 mmol) inside the glove box. After that, 3,3-dimethylindoline-2-thione **4g** (0.035 g, 0.2 mmol) and 3.0 mL CH<sub>2</sub>Cl<sub>2</sub> were added outside the glove box under a nitrogen atmosphere. Then, the reaction mixture was cooled at 0 °C and stirred for 5 minutes. After 5 minutes, bicyclo[1.1.0]butan-1-yl(naphthalen-2-yl)methanone **2a** (0.050 g, 0.24 mmol) and 1.0 mL CH<sub>2</sub>Cl<sub>2</sub> were added subsequently. Then, the reaction mixture was slowly warmed to rt while stirring for 12 h. After 12 h, the solvent was evaporated, and the crude residue was pre-adsorbed on silica gel and purified by flash column chromatography on silica gel (Pet.ether-EtOAc as eluent) to afford **5g** as yellow solid (0.032 g, 42% yield).

*This study suggests that even without the favourable aromatization process, thiones can still undergo reactions. If there is potential for aromatization, the imine bearing product can convert to desired product via tautomerization. Therefore, it's possible that the cyclobutane bearing imine serves as an intermediate in the developed ene reaction (Scheme 4 of the manuscript, eq 6).*



### Reaction with 1-methylpyrrolidine-2-thione

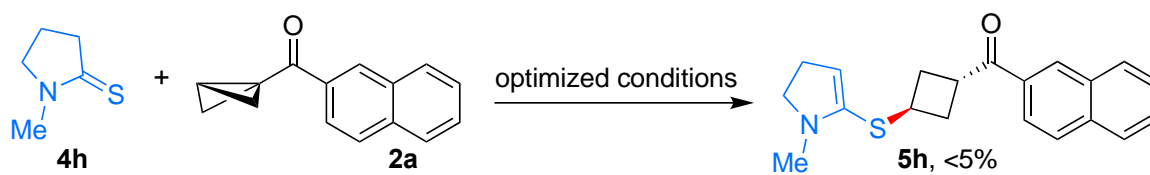

To an oven-dried screw-capped test tube equipped with a magnetic stir bar was added  $\text{Sc}(\text{OTf})_3$  (0.005 g, 0.01 mmol) inside the glove box. After that, 1-methylpyrrolidine-2-thione **4h** (0.023 g, 0.2 mmol) and 3.0 mL  $\text{CH}_2\text{Cl}_2$  were added outside the glove box under a nitrogen atmosphere. Then, the reaction mixture was cooled at 0 °C and stirred for 5 minutes. After 5 minutes, bicyclo[1.1.0]butan-1-yl(naphthalen-2-yl)methanone **2a** (0.050 g, 0.24 mmol) and 1.0 mL  $\text{CH}_2\text{Cl}_2$  were added subsequently. Then, the reaction mixture was slowly warmed to rt while stirring for 12 h. After 12 h, the reaction mixture was passed through a pad of silica gel and then eluted with EtOAc (3x10 mL), and the solvent was evaporated to get the crude products, which was analyzed using  $^1\text{H}$  NMR spectroscopy. In this case, no desired product formation was observed.

*This study highlights the significance of the N-H proton in facilitating the formation of the BCB ring-open product from 1-methylpyrrolidine-2-thione. However, in the case of 1-methylindoline-2-thione, the expected product was still formed in moderate yield even in the absence of the N-H proton. This disparity in outcomes may be attributed to the potential influence of aromaticity, which could serve as an additional driving force for product formation in 1-methylindoline-2-thione, a feature lacking in 1-methylpyrrolidine-2-thione. (Scheme 4 of the manuscript, eq 7).*

### Reaction with benzylidene-1-methylindoline-2-thione

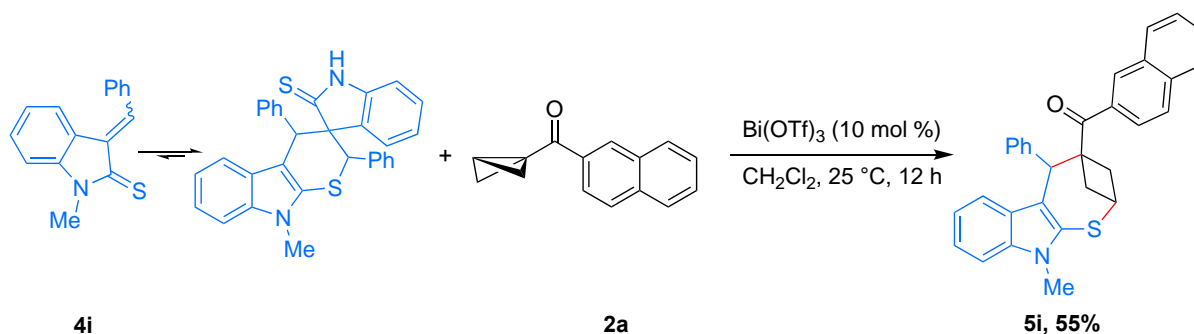

To an oven-dried screw-capped test tube equipped with a magnetic stir bar was added  $\text{Bi}(\text{OTf})_3$  (0.006 g, 0.01 mmol) inside the glove box. After that, 3-benzylidene-1-methylindoline-2-thione **4i** (0.050 g, 0.2 mmol), bicyclo[1.1.0]butan-1-yl(naphthalen-2-yl)methanone **2a** (0.021 g, 0.1 mmol) and 4.0 mL  $\text{CH}_2\text{Cl}_2$  were added outside the glove box

under a nitrogen atmosphere at 25 °C. Then, the reaction mixture was stirred for 12 h at the same temperature. After 12 h, the solvent was evaporated, and the crude residue was pre-adsorbed on silica gel and purified by flash column chromatography on silica gel (Pet.ether-EtOAc as eluent) to afford (10-methyl-5-phenyl-2,3,5,10-tetrahydro-4*H*-2,4-methanothiepine[2,3-*b*]indol-4-yl)(naphthalen-2-yl)methanone **5i** as white solid (0.025 g, 55% yield).

*Once more, this study highlighted the essential role of aromaticity. While the addition of thioamide to BCB could potentially yield the ring-open product in this scenario, it is the driving force of aromatization that propels the reaction towards the formation of the annulated product (Scheme 4 of the manuscript, eq 8).*

## 6. X-ray Data of **8**

Single crystal of **8** (recrystallized from EtOAc/*n*-hexane at 25 °C) was mounted and the diffraction data was collected at 120 K on a Bruker APEX-II CCD diffractometer using SMART/SAINT software. Intensity data were collected using MoK $\alpha$  radiation ( $\lambda=0.71073$  Å). The single crystal was affixed to a Hampton Research cryoloop using Paratone-N oil. Data collection and reduction was performed using Bruker APEX2 and Bruker SAINT, respectively. The structure was solved by direct methods using the SHELX-97 and refined by full-matrix leastsquares on F<sup>2</sup>. Empirical absorption corrections were applied with SADABS. All Nonhydrogen atoms were refined anisotropically and hydrogen atoms were included in geometric positions. Structure was drawn using Olex-2 and Mercury-3. CCDC 2335481 (**8**) contains the supplementary crystallographic data for this paper. These data can be obtained free of charge from Data Centre via [www.ccdc.cam.ac.uk/data\\_request/cif](http://www.ccdc.cam.ac.uk/data_request/cif). The crystallographic refinement parameters are given below:

|                                   |                                                                                                     |
|-----------------------------------|-----------------------------------------------------------------------------------------------------|
| Compound                          | <b>8</b>                                                                                            |
| Empirical formula                 | C <sub>23</sub> H <sub>19</sub> NO <sub>3</sub> S                                                   |
| Formula weight                    | 389.478                                                                                             |
| Temperature                       | 120.15 K                                                                                            |
| Wavelength                        | 0.71073 Å                                                                                           |
| Crystal system                    | Triclinic                                                                                           |
| Space group                       | P-1                                                                                                 |
| Unit cell dimensions              | a = 8.8830(5) Å, b = 10.7359(6) Å, c = 10.9008(6) Å, α = 84.098(2)°, β = 80.590(2)°, γ = 65.900(1)° |
| Volume                            | 935.44(9) Å <sup>3</sup>                                                                            |
| Z                                 | 2                                                                                                   |
| Density (calculated)              | 1.383 g/cm <sup>3</sup>                                                                             |
| Absorption coefficient            | 0.198 mm <sup>-1</sup>                                                                              |
| F(000)                            | 408.4                                                                                               |
| Theta range for data collection   | 3.8 to 68.24°                                                                                       |
| Index ranges                      | -13 ≤ h ≤ 13, -15 ≤ k ≤ 15, -15 ≤ l ≤ 16                                                            |
| Reflections collected             | 26876                                                                                               |
| Independent reflections           | 6247 [R <sub>int</sub> = 0.0302, R <sub>sigma</sub> = 0.0279]                                       |
| Data / restraints / parameters    | 6247/0/253                                                                                          |
| Goodness-of-fit on F <sup>2</sup> | 1.044                                                                                               |
| Final R indices [I > 2σ(I)]       | R <sub>I</sub> = 0.0377, wR <sub>2</sub> = 0.0960                                                   |
| R indices (all data)              | R <sub>I</sub> = 0.0498, wR <sub>2</sub> = 0.1030                                                   |

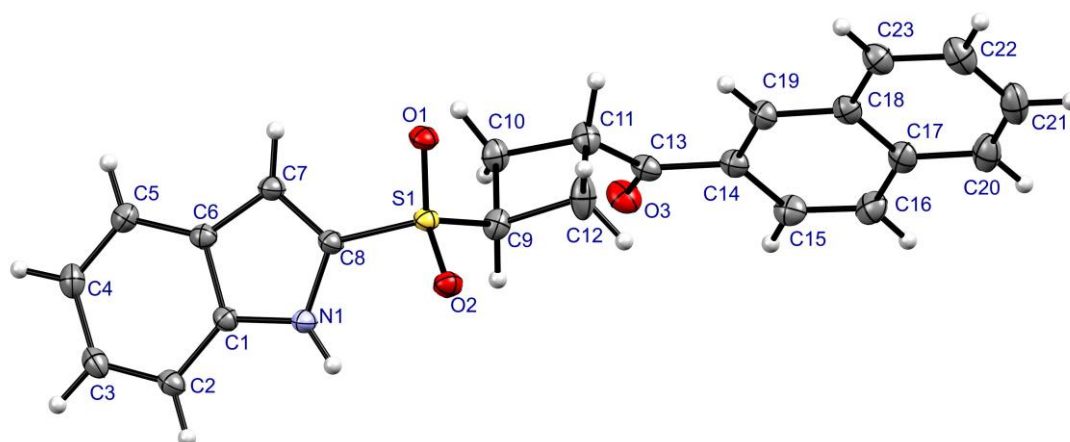

**Figure S1.** Crystal structure of **8** (Thermal ellipsoids are shown with 50% probability)

## 7. DFT Studies

All DFT calculations were performed using Gaussian 16 software.<sup>3</sup> Geometry optimizations were carried out in gas phase using hybrid functional B3LYP-D3 along with

<sup>3</sup> M. J. Frisch, G. W. Trucks, H. B. Schlegel, G. E. Scuseria, M. A. Robb, J. R. Cheeseman, G. Scalmani, V. Barone, G. A. Petersson, H. Nakatsuji, X. Li, M. Caricato, A. V. Marenich, J. Bloino, B. G. Janesko, R. Gomperts, B. Mennucci, H. P. Hratchian, J. V. Ortiz, A. F. Izmaylov, J. L. Sonnenberg, D. Williams-Young, F. Ding, F. Lipparini, F. Egidi, J. Goings, B. Peng, A. Petrone, T. Henderson, D. Ranasinghe, V. G. Zakrzewski, J. Gao, N. Rega, G. Zheng, W. Liang, M. Hada, M. Ehara, K. Toyota, R. Fukuda, J. Hasegawa, M. Ishida, T. Nakajima, Y.

LANL2DZ basis set with an effective core potential (ECP) for Sc and split valence Pople's type basis set 6-31G(d,p) for all other atoms.<sup>4</sup> Vibrational frequency calculations were done to verify the nature of stationary points as minima or first-order saddle points with the same functional and basis set to obtain thermal energy corrections at 1 atm and 298K.<sup>5</sup> Single point energies of B3LYP-D3 optimized structures were calculated using the B3LYP-D3(BJ) functional and triple zeta basis set; 6-311++G(d,p). SMD solvation model was used to consider the solvent effect of dichloromethane.<sup>6</sup> Thermal corrections obtained from optimized geometries were added to the electronic energies obtained after single point calculations. The free energies are reported at the SMD(DCM)/B3LYP-D3(BJ)/6-311++G(d,p), LANL2DZ(Sc)//B3LYP-D3/6-31G(d,p), LANL2DZ(Sc) level of theory. All the Gibbs free energies reported here are calculated using GoodVibes package at room temperature and 1M concentration.<sup>7</sup> Grimme's quasi-harmonic approximation<sup>8</sup> is employed to compute the entropic contributions for frequencies below the defined cut-off ( $100\text{ cm}^{-1}$ ), with entropy terms for these lower frequencies being estimated using the free-rotor approximation.

Based on the mechanistic studies and DFT calculations a catalytic cycle for diastereoselective ene reaction of thioindolinones is presented in Figure S2. Reaction begins with the coordination of BCB **2a** with  $\text{Sc}(\text{OTf})_3$  to form the intermediate **A'**. Now, 2-thioindolinone **1a** attacks the intermediate **A'** at C3 position via **TS(A'-B)** to give the intermediate **B** (please see Figure S4). From this intermediate several pathways can be followed, but the major pathway goes via the **TS(B-C)** as shown in Figure S5. Depending upon the position of triflate, two different diastereomers can be formed. Triflate  $t_1$  abstracts the proton from thioindolinone via **TS(B-C)** to form the intermediate **C**, while proton abstraction from triflate  $t_2$  via **TS(B-C')** lead to intermediate **C'**. In the final step, the proton is transferred from triflate to the C1 position of the BCB to give the product.

---

Honda, O. Kitao, H. Nakai, T. Vreven, K. Throssell, J. A. Montgomery, Jr., J. E. Peralta, F. Ogliaro, M. J. Bearpark, J. J. Heyd, E. N. Brothers, K. N. Kudin, V. N. Staroverov, T. A. Keith, R. Kobayashi, J. Normand, K. Raghavachari, A. P. Rendell, J. C. Burant, S. S. Iyengar, J. Tomasi, M. Cossi, J. M. Millam, M. Klene, C. Adamo, R. Cammi, J. W. Ochterski, R. L. Martin, K. Morokuma, O. Farkas, J. B. Foresman, and D. J. Fox, Gaussian, Inc., Wallingford CT, 2016.

<sup>4</sup> (a) C. Lee, W. Yang and R. G. Parr, *Phys. Rev. B: Condens. Matter Mater. Phys.*, 1988, **37**, 785; (b) A. D. Becke, *J. Chem. Phys.*, 1993, **98**, 5648; (c) W. J. Hehre, R. Ditchfield and J. A. Pople, *J. Chem. Phys.*, 1972, **56**, 2257; (d) P. C. Hariharan and J. A. Pople, *Theor. Chim. Acta.*, 1973, **28**, 213; (e) P. J. Hay and W. R. Wadt, *J. Chem. Phys.*, 1985, **82**, 299.

<sup>5</sup> A. P. Scott, L. Radom, *J. Phys. Chem.* 1996, **100**, 16502.

<sup>6</sup> A. V. Marenich, C. J. Cramer and D. G. Truhlar *J. Phys. Chem. B*, 2009, **113**, 6378.

<sup>7</sup> G. Luchini, J. V. Alegre-REquena, I. Funes-Ardoiz, R. S. Paton, *F1000 Research* **2020**, 9, 291.

<sup>8</sup> S. Grimme, *Chem. Eur. J.* **2012**, 18, 9955.

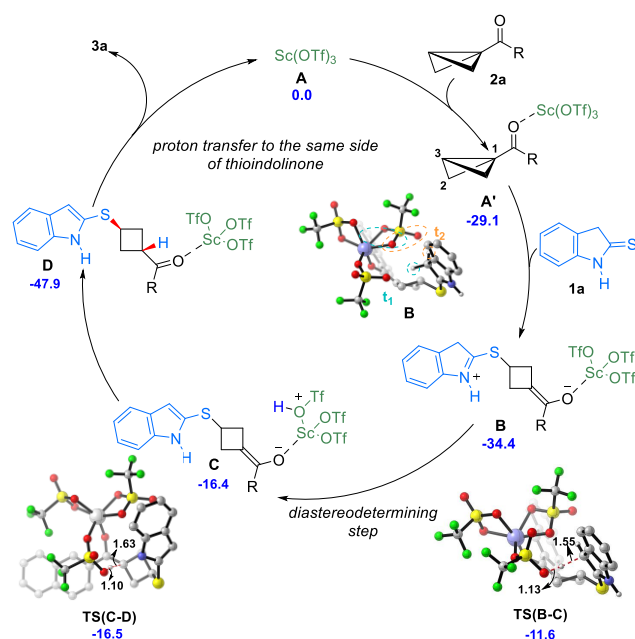

**Figure S2.** Proposed catalytic cycle. Relative Gibbs free energies ( $\Delta G$ ) are given in kcal/mol. Distances are given in Å.

This proton transfer is barrierless and very facile. Since the diastereomeric product formation depends upon the proton abstraction by triflate, the formation of **C** via **TS(B-C)** becomes the diastereodetermining step of the reaction. After subsequent steps, proton abstraction by triflate  $t_1$  leads to the major product while abstraction by triflate  $t_2$  gives the minor product. The **TS(B-C)** is more stable than **TS(B-C')** by 1.6 kcal mol<sup>-1</sup> which corresponds to the dr of 1:14. This is in good agreement with experimental value of 1:20. Furthermore, the energy difference between diastereomeric products was found to be only 0.2 kcal mol<sup>-1</sup> which suggests that the diastereoselectivity is not governed by thermodynamic stability of the products. The mechanistic study also validates this result where 1:1 mixture of products **3a** and **3a'** is found when the reaction is carried out in the presence of LDA and D<sub>2</sub>O. From the free energy values and mechanistic studies, it is established that reaction is kinetically controlled.

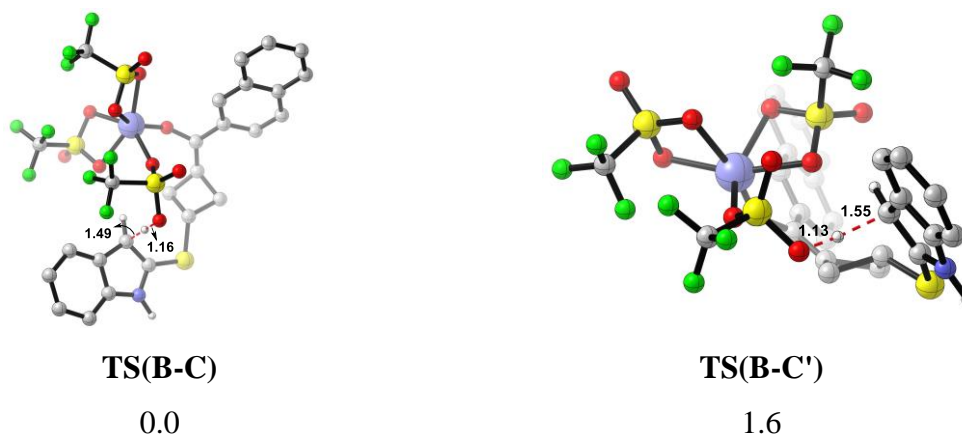

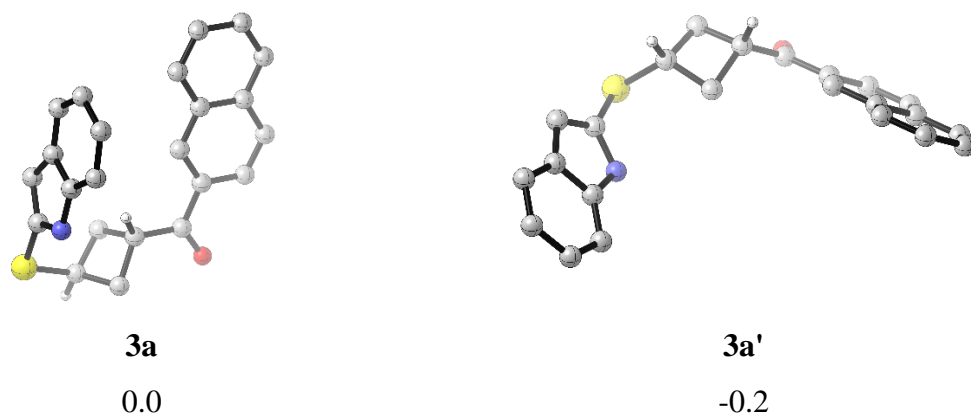

**Figure S3.** Structures of the diastereodetermining TSs and products with their relative free energies. Energies are given in kcal mol<sup>-1</sup>. Some hydrogen atoms are removed for clarity.

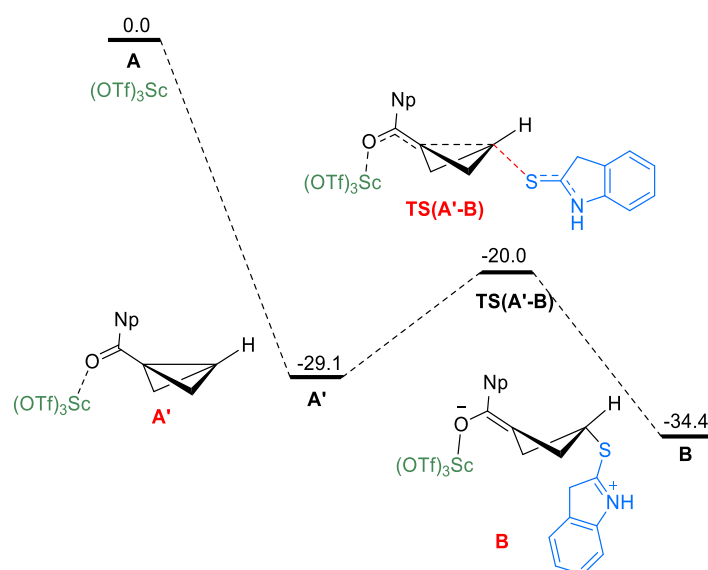

**Figure S4.** Formation of the intermediate **B**.

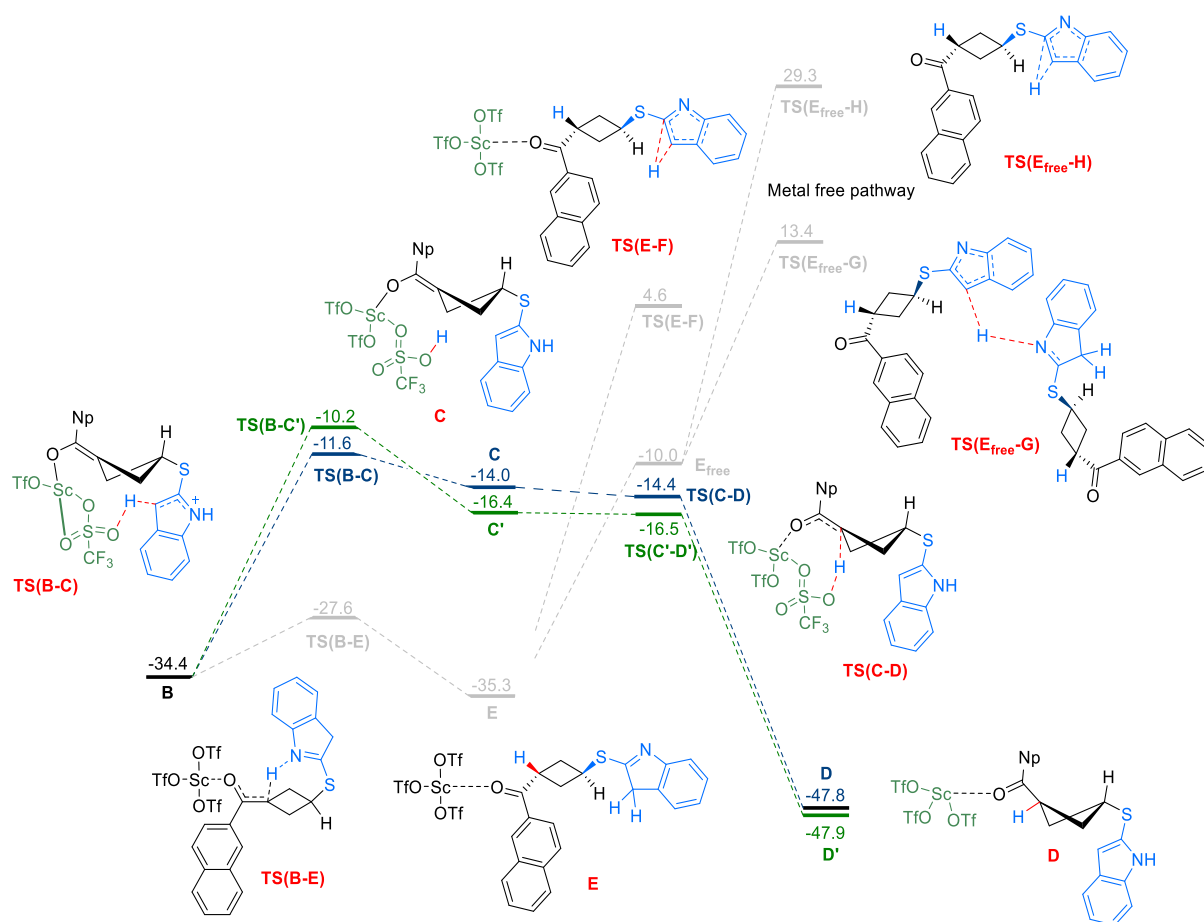

**Figure S5.** Different possible pathways from intermediate **B**.

### Coordinates

A

Number of imaginary frequencies : 0 Electronic energy : HF=-2930.9756952  
 Zero-point correction= 0.087442 (Hartree/Particle)  
 Thermal correction to Energy= 0.113374  
 Thermal correction to Enthalpy= 0.114318  
 Thermal correction to Gibbs Free Energy= 0.025038  
 Sum of electronic and zero-point Energies= -2930.888254  
 Sum of electronic and thermal Energies= -2930.862321  
 Sum of electronic and thermal Enthalpies= -2930.861377  
 Sum of electronic and thermal Free Energies= -2930.950658

### Cartesian Coordinates

|    |           |           |           |
|----|-----------|-----------|-----------|
| 21 | 0.000033  | 0.000023  | -0.268164 |
| 8  | 1.568004  | 0.913943  | -1.373246 |
| 8  | 0.008823  | -1.814847 | -1.373228 |
| 8  | -1.068124 | 1.453918  | 0.867995  |
| 16 | 2.589481  | 0.896189  | -0.234442 |
| 16 | -2.071126 | 1.794219  | -0.234604 |
| 16 | -0.518391 | -2.690657 | -0.235032 |
| 8  | 3.930070  | 0.432995  | -0.513736 |
| 8  | 1.793013  | 0.198194  | 0.868257  |
| 8  | -1.576107 | 0.899808  | -1.372898 |
| 8  | -2.340565 | 3.186583  | -0.514728 |

|   |           |           |           |
|---|-----------|-----------|-----------|
| 8 | -0.725574 | -1.651880 | 0.867480  |
| 8 | -1.589401 | -3.620242 | -0.515270 |
| 6 | 0.981517  | -3.665881 | 0.315686  |
| 6 | 2.684247  | 2.683208  | 0.315154  |
| 6 | -3.665899 | 0.982956  | 0.315554  |
| 9 | 3.274459  | 3.390075  | -0.640934 |
| 9 | 3.387726  | 2.745500  | 1.439327  |
| 9 | 1.448388  | 3.135482  | 0.522283  |
| 9 | -3.438773 | -0.312852 | 0.525370  |
| 9 | -4.572613 | 1.138115  | -0.641475 |
| 9 | -4.072646 | 1.563112  | 1.438283  |
| 9 | 0.682024  | -4.309123 | 1.437748  |
| 9 | 1.301826  | -4.527891 | -0.641644 |
| 9 | 1.989561  | -2.820859 | 0.526968  |

-----  
A'  
-----

Number of imaginary frequencies : 0 Electronic energy : HF=-3585.0485447  
Zero-point correction= 0.314890 (Hartree/Particle)  
Thermal correction to Energy= 0.354919  
Thermal correction to Enthalpy= 0.355864  
Thermal correction to Gibbs Free Energy= 0.234816  
Sum of electronic and zero-point Energies= -3584.733655  
Sum of electronic and thermal Energies= -3584.693625  
Sum of electronic and thermal Enthalpies= -3584.692681  
Sum of electronic and thermal Free Energies= -3584.813728

.....  
Cartesian Coordinates  
.....

|    |           |           |           |
|----|-----------|-----------|-----------|
| 21 | 0.957734  | -0.475361 | 0.106004  |
| 8  | -0.684446 | -2.039588 | -0.150663 |
| 8  | 4.489744  | 1.681961  | 1.725680  |
| 8  | 1.796459  | -1.279486 | -1.737693 |
| 16 | -0.100234 | -2.939778 | 0.907982  |
| 16 | 1.026052  | -0.351564 | -2.659418 |
| 16 | 3.038619  | 1.585936  | 1.713690  |
| 8  | -0.979115 | -3.404489 | 1.972042  |
| 8  | 1.170637  | -2.212400 | 1.338337  |
| 8  | 0.209359  | 0.486629  | -1.680477 |
| 8  | 0.333317  | -0.917119 | -3.800457 |
| 8  | 2.555211  | 0.522428  | 0.676101  |
| 8  | 2.285025  | 1.477146  | 2.962758  |
| 6  | 2.399226  | 3.118426  | 0.860358  |
| 6  | 0.514443  | -4.453521 | 0.003816  |
| 6  | 2.310651  | 0.839339  | -3.308421 |
| 9  | -0.527697 | -5.059650 | -0.561478 |
| 9  | 1.095227  | -5.269524 | 0.880035  |
| 9  | 1.389050  | -4.089131 | -0.927436 |
| 9  | 2.956401  | 1.392657  | -2.284386 |
| 9  | 1.696714  | 1.783561  | -4.018996 |
| 9  | 3.165677  | 0.172740  | -4.078831 |
| 9  | 1.088168  | 2.978429  | 0.598801  |
| 9  | 2.573016  | 4.173673  | 1.656191  |
| 9  | 3.048228  | 3.311794  | -0.288596 |
| 8  | -0.385940 | 0.434866  | 1.263384  |
| 6  | -1.500360 | 0.574949  | 3.296561  |
| 6  | -0.320900 | 0.143988  | 4.156546  |
| 1  | 0.609231  | -0.086125 | 3.648483  |
| 1  | -0.205015 | 0.704011  | 5.085326  |



|   |           |           |           |
|---|-----------|-----------|-----------|
| 6 | -1.450696 | -0.799141 | 4.032817  |
| 6 | -2.601699 | 0.124668  | 4.231043  |
| 1 | -2.686352 | 0.654615  | 5.181487  |
| 1 | -3.551794 | -0.168007 | 3.791331  |
| 6 | -1.487741 | 0.658584  | 1.865563  |
| 6 | -2.682841 | 0.991746  | 1.088916  |
| 6 | -3.787123 | 1.692942  | 1.665477  |
| 6 | -2.733425 | 0.618771  | -0.250584 |
| 6 | -4.891902 | 1.986453  | 0.906711  |
| 1 | -3.730177 | 2.030038  | 2.693538  |
| 6 | -3.863789 | 0.899652  | -1.045043 |
| 1 | -1.905893 | 0.087014  | -0.697963 |
| 6 | -4.973217 | 1.595989  | -0.460161 |
| 1 | -5.721168 | 2.536095  | 1.343231  |
| 6 | -6.102551 | 1.877956  | -1.269084 |
| 1 | -6.946142 | 2.405223  | -0.832221 |
| 6 | -3.918743 | 0.514560  | -2.413832 |
| 1 | -3.066722 | -0.003944 | -2.845177 |
| 6 | -5.030024 | 0.805322  | -3.170828 |
| 1 | -5.070444 | 0.513073  | -4.215472 |
| 6 | -6.128762 | 1.489903  | -2.592007 |
| 1 | -6.999506 | 1.711272  | -3.202227 |
| 1 | -1.457762 | -1.748233 | 3.510618  |

-----  
 TS(A'-B).log  
 -----

Number of imaginary frequencies : 1 Electronic energy : HF=-4347.1003006  
 Zero-point correction= 0.448433 (Hartree/Particle)  
 Thermal correction to Energy= 0.497079  
 Thermal correction to Enthalpy= 0.498023  
 Thermal correction to Gibbs Free Energy= 0.357795  
 Sum of electronic and zero-point Energies= -4346.651867  
 Sum of electronic and thermal Energies= -4346.603221  
 Sum of electronic and thermal Enthalpies= -4346.602277  
 Sum of electronic and thermal Free Energies= -4346.742505

-----  
 Cartesian Coordinates  
 -----

|    |           |           |           |
|----|-----------|-----------|-----------|
| 21 | 0.718402  | 1.013410  | -0.096392 |
| 8  | 1.271337  | -0.321641 | 1.698463  |
| 8  | -2.546498 | 3.399735  | -1.834968 |
| 8  | 1.153931  | 2.655001  | 1.336212  |
| 16 | -0.162896 | -0.626580 | 2.020397  |
| 16 | 2.594647  | 2.807369  | 0.903456  |
| 16 | -1.916664 | 2.088147  | -1.867481 |
| 8  | -0.558374 | -2.025318 | 2.159219  |
| 8  | -0.957810 | 0.196375  | 1.018775  |
| 8  | 2.742167  | 1.738879  | -0.179215 |
| 8  | 3.630229  | 2.882338  | 1.916019  |
| 8  | -0.509271 | 2.110727  | -1.216448 |
| 8  | -2.679749 | 0.901650  | -1.460742 |
| 6  | -1.408151 | 1.769216  | -3.631416 |
| 6  | -0.544917 | 0.190060  | 3.653321  |
| 6  | 2.628033  | 4.406945  | -0.057606 |
| 9  | 0.112849  | -0.438611 | 4.623857  |
| 9  | -1.863468 | 0.089727  | 3.862212  |
| 9  | -0.194766 | 1.468920  | 3.616601  |
| 9  | 1.722925  | 4.351069  | -1.034815 |
| 9  | 3.842274  | 4.575694  | -0.578680 |

|    |           |           |           |
|----|-----------|-----------|-----------|
| 9  | 2.343259  | 5.414128  | 0.764570  |
| 9  | -0.740500 | 0.605767  | -3.705016 |
| 9  | -2.497261 | 1.692757  | -4.399603 |
| 9  | -0.619609 | 2.750100  | -4.070092 |
| 8  | 1.066713  | -0.515973 | -1.233584 |
| 6  | 0.200038  | -2.531263 | -1.994287 |
| 6  | -1.219518 | -2.008644 | -2.098841 |
| 1  | -1.425631 | -0.987712 | -1.798514 |
| 1  | -1.725658 | -2.285780 | -3.027366 |
| 6  | -1.193499 | -3.077057 | -1.061466 |
| 6  | -0.201411 | -3.975790 | -1.736734 |
| 1  | -0.579092 | -4.514714 | -2.610832 |
| 1  | 0.433549  | -4.591539 | -1.102537 |
| 6  | 1.255277  | -1.795740 | -1.458537 |
| 6  | 2.578370  | -2.363787 | -1.159289 |
| 6  | 3.004594  | -3.607265 | -1.720414 |
| 6  | 3.445510  | -1.671652 | -0.323921 |
| 6  | 4.235454  | -4.129935 | -1.411037 |
| 1  | 2.366659  | -4.120615 | -2.430149 |
| 6  | 4.715531  | -2.190457 | 0.013629  |
| 1  | 3.153756  | -0.718294 | 0.093818  |
| 6  | 5.124062  | -3.451611 | -0.531001 |
| 1  | 4.553772  | -5.070154 | -1.853433 |
| 6  | 6.400636  | -3.964379 | -0.186185 |
| 1  | 6.713137  | -4.919983 | -0.598929 |
| 6  | 5.597160  | -1.487207 | 0.880500  |
| 1  | 5.278286  | -0.530053 | 1.284670  |
| 6  | 6.829136  | -2.013032 | 1.196218  |
| 1  | 7.498697  | -1.472781 | 1.858582  |
| 6  | 7.232475  | -3.261553 | 0.658885  |
| 1  | 8.207597  | -3.664217 | 0.917310  |
| 1  | -1.076552 | -2.843198 | -0.009805 |
| 6  | -4.626147 | -0.698053 | 1.123077  |
| 6  | -5.825557 | -1.307907 | 0.741563  |
| 6  | -7.072378 | -0.769014 | 1.028071  |
| 6  | -7.085564 | 0.442372  | 1.730472  |
| 6  | -5.896028 | 1.069484  | 2.117564  |
| 6  | -4.650233 | 0.504028  | 1.813726  |
| 6  | -3.490340 | -1.544650 | 0.626879  |
| 6  | -4.180327 | -2.707790 | -0.055400 |
| 1  | -7.992815 | -1.255876 | 0.721682  |
| 1  | -8.038292 | 0.901957  | 1.974400  |
| 1  | -5.939500 | 2.010525  | 2.656624  |
| 1  | -3.724274 | 0.985869  | 2.108917  |
| 7  | -5.504911 | -2.498171 | 0.045051  |
| 1  | -6.186470 | -3.137037 | -0.343506 |
| 16 | -3.473950 | -4.043398 | -0.791387 |
| 1  | -2.829504 | -1.912021 | 1.417271  |
| 1  | -2.863881 | -0.989443 | -0.076860 |

-----  
 B.log  
 -----

Number of imaginary frequencies : 0 Electronic energy : HF=-4347.1120422  
 Zero-point correction= 0.450078 (Hartree/Particle)  
 Thermal correction to Energy= 0.498678  
 Thermal correction to Enthalpy= 0.499622  
 Thermal correction to Gibbs Free Energy= 0.359681  
 Sum of electronic and zero-point Energies= -4346.661964  
 Sum of electronic and thermal Energies= -4346.613364

Sum of electronic and thermal Enthalpies= -4346.612420  
Sum of electronic and thermal Free Energies= -4346.752361

.....  
Cartesian Coordinates

.....  
21 0.851097 1.045551 -0.160916  
8 1.311559 -0.270269 1.705650  
8 -2.461932 3.416401 -1.900057  
8 1.055845 2.730309 1.342525  
16 -0.131406 -0.578251 1.955929  
16 2.478233 3.032873 0.946625  
16 -1.890923 2.076343 -1.882950  
8 -0.534920 -1.975337 2.128224  
8 -0.892187 0.198496 0.900058  
8 2.777906 1.986885 -0.127647  
8 3.473749 3.229979 1.983730  
8 -0.465044 2.060346 -1.301593  
8 -2.711104 0.959978 -1.386724  
6 -1.494443 1.637119 -3.648508  
6 -0.624758 0.260484 3.546770  
6 2.369359 4.621885 -0.024248  
9 -0.026893 -0.341768 4.572190  
9 -1.958149 0.132347 3.671615  
9 -0.306638 1.545840 3.523390  
9 1.510306 4.467232 -1.032866  
9 3.574430 4.926169 -0.505792  
9 1.946429 5.596544 0.779862  
9 -0.870873 0.449032 -3.695273  
9 -2.629141 1.555780 -4.351756  
9 -0.702985 2.563579 -4.188701  
8 1.327854 -0.427937 -1.248982  
6 0.309632 -2.443748 -1.752339  
6 -1.092461 -1.887410 -1.764633  
1 -1.263068 -0.903049 -1.341204  
1 -1.580499 -1.949798 -2.745319  
6 -1.406971 -3.119352 -0.889396  
6 -0.185467 -3.863636 -1.494884  
1 -0.438642 -4.414997 -2.411068  
1 0.385645 -4.505251 -0.820559  
6 1.424689 -1.763696 -1.393271  
6 2.737753 -2.368161 -1.094215  
6 3.076179 -3.671594 -1.565671  
6 3.662803 -1.669665 -0.335582  
6 4.283594 -4.244669 -1.248515  
1 2.383873 -4.199673 -2.212707  
6 4.914689 -2.235765 0.007670  
1 3.430624 -0.670650 0.014184  
6 5.236167 -3.555337 -0.449256  
1 4.532416 -5.234798 -1.622319  
6 6.492194 -4.116737 -0.100122  
1 6.735049 -5.117192 -0.449702  
6 5.862805 -1.529365 0.797577  
1 5.612845 -0.528763 1.140626  
6 7.071885 -2.102671 1.121262  
1 7.789164 -1.555253 1.725818  
6 7.389540 -3.407848 0.668359  
1 8.347483 -3.847863 0.930675  
1 -1.229447 -2.927955 0.168839  
6 -4.731192 -0.859570 1.123016  
6 -5.831922 -1.605495 0.694300

|    |           |           |           |
|----|-----------|-----------|-----------|
| 6  | -7.144877 | -1.286299 | 1.011692  |
| 6  | -7.328587 | -0.149320 | 1.805845  |
| 6  | -6.238985 | 0.613188  | 2.247300  |
| 6  | -4.925045 | 0.267773  | 1.908570  |
| 6  | -3.486257 | -1.480464 | 0.565896  |
| 6  | -4.010099 | -2.673364 | -0.184284 |
| 1  | -7.984886 | -1.879232 | 0.664721  |
| 1  | -8.335722 | 0.145719  | 2.081893  |
| 1  | -6.418255 | 1.490328  | 2.860548  |
| 1  | -4.077705 | 0.853239  | 2.248681  |
| 7  | -5.337317 | -2.684842 | -0.088698 |
| 1  | -5.928777 | -3.382158 | -0.525186 |
| 16 | -3.119857 | -3.873649 | -1.017107 |
| 1  | -2.753929 | -1.785387 | 1.321628  |
| 1  | -2.958283 | -0.788298 | -0.104899 |

-----  
 TS(B-C)  
 -----

Number of imaginary frequencies : 1 Electronic energy : HF=-4347.0879653  
 Zero-point correction= 0.445480 (Hartree/Particle)  
 Thermal correction to Energy= 0.493181  
 Thermal correction to Enthalpy= 0.494125  
 Thermal correction to Gibbs Free Energy= 0.358287  
 Sum of electronic and zero-point Energies= -4346.642485  
 Sum of electronic and thermal Energies= -4346.594785  
 Sum of electronic and thermal Enthalpies= -4346.593840  
 Sum of electronic and thermal Free Energies= -4346.729678

.....  
 Cartesian Coordinates  
 .....

|    |           |           |           |
|----|-----------|-----------|-----------|
| 21 | 0.845892  | 1.234713  | -0.263392 |
| 8  | 1.796811  | 0.597633  | 1.597820  |
| 8  | -2.676691 | 0.925316  | 0.745274  |
| 8  | -0.152205 | 2.922629  | 0.981327  |
| 16 | 0.924287  | -0.619837 | 1.840148  |
| 16 | 0.778678  | 3.960500  | 0.421332  |
| 16 | -2.452745 | 0.892657  | -0.689694 |
| 8  | 1.566572  | -1.880471 | 2.160572  |
| 8  | -0.030824 | -0.599235 | 0.662084  |
| 8  | 1.718138  | 3.154681  | -0.484791 |
| 8  | 1.384608  | 4.932113  | 1.310502  |
| 8  | -1.085728 | 1.242783  | -1.200300 |
| 8  | -2.944350 | -0.402438 | -1.379936 |
| 6  | -3.538803 | 2.164309  | -1.520839 |
| 6  | -0.191363 | -0.175998 | 3.271635  |
| 6  | -0.260608 | 4.914101  | -0.804268 |
| 9  | 0.501539  | -0.204008 | 4.406518  |
| 9  | -1.171510 | -1.087688 | 3.316333  |
| 9  | -0.712381 | 1.029086  | 3.081726  |
| 9  | -0.652193 | 4.097288  | -1.791466 |
| 9  | 0.452312  | 5.913449  | -1.315878 |
| 9  | -1.336475 | 5.395379  | -0.181843 |
| 9  | -3.316191 | 2.153906  | -2.829847 |
| 9  | -4.809159 | 1.868842  | -1.266167 |
| 9  | -3.233600 | 3.353589  | -1.010688 |
| 8  | 1.867448  | 0.197752  | -1.448881 |
| 6  | 1.435745  | -2.001166 | -2.108465 |
| 6  | -0.066780 | -1.897230 | -2.181416 |
| 1  | -0.550671 | -1.029717 | -1.751200 |

|    |           |           |           |
|----|-----------|-----------|-----------|
| 1  | -0.460425 | -2.071147 | -3.191134 |
| 6  | -0.051965 | -3.211868 | -1.363947 |
| 6  | 1.372923  | -3.513644 | -1.917021 |
| 1  | 1.339989  | -4.074387 | -2.860665 |
| 1  | 2.086614  | -3.979925 | -1.234610 |
| 6  | 2.309580  | -1.070617 | -1.671166 |
| 6  | 3.719482  | -1.342738 | -1.325644 |
| 6  | 4.425003  | -2.416888 | -1.944637 |
| 6  | 4.371082  | -0.572879 | -0.376890 |
| 6  | 5.721147  | -2.704953 | -1.592611 |
| 1  | 3.935430  | -2.990135 | -2.724918 |
| 6  | 5.706539  | -0.847360 | 0.007935  |
| 1  | 3.849125  | 0.245551  | 0.105430  |
| 6  | 6.401416  | -1.939426 | -0.606942 |
| 1  | 6.250008  | -3.520544 | -2.079406 |
| 6  | 7.739445  | -2.210175 | -0.217690 |
| 1  | 8.264779  | -3.037635 | -0.688115 |
| 6  | 6.377589  | -0.072897 | 0.993511  |
| 1  | 5.845239  | 0.751873  | 1.460173  |
| 6  | 7.674822  | -0.362774 | 1.351683  |
| 1  | 8.177596  | 0.235126  | 2.106280  |
| 6  | 8.362760  | -1.440617 | 0.739859  |
| 1  | 9.386360  | -1.657940 | 1.031274  |
| 1  | 0.021821  | -3.003329 | -0.296181 |
| 6  | -3.945325 | -2.465395 | 0.814787  |
| 6  | -4.749756 | -3.449181 | 0.199230  |
| 6  | -6.101871 | -3.612435 | 0.495977  |
| 6  | -6.642759 | -2.759030 | 1.456655  |
| 6  | -5.856190 | -1.777593 | 2.087810  |
| 6  | -4.509118 | -1.614323 | 1.772196  |
| 6  | -2.624693 | -2.536083 | 0.198491  |
| 6  | -2.662478 | -3.650652 | -0.671004 |
| 1  | -6.705613 | -4.370915 | 0.007126  |
| 1  | -7.690775 | -2.855917 | 1.722610  |
| 1  | -6.311220 | -1.134447 | 2.834871  |
| 1  | -3.901812 | -0.851775 | 2.247520  |
| 7  | -3.933160 | -4.145548 | -0.696688 |
| 1  | -4.243907 | -4.888624 | -1.305313 |
| 16 | -1.409116 | -4.433024 | -1.609971 |
| 1  | -1.717085 | -2.146811 | 0.641629  |
| 1  | -2.810991 | -1.333814 | -0.757294 |

-----  
C  
-----

Number of imaginary frequencies : 0 Electronic energy : HF=-4347.1017874  
Zero-point correction= 0.447240 (Hartree/Particle)  
Thermal correction to Energy= 0.495693  
Thermal correction to Enthalpy= 0.496637  
Thermal correction to Gibbs Free Energy= 0.358999  
Sum of electronic and zero-point Energies= -4346.654548  
Sum of electronic and thermal Energies= -4346.606095  
Sum of electronic and thermal Enthalpies= -4346.605150  
Sum of electronic and thermal Free Energies= -4346.742788

.....  
Cartesian Coordinates  
.....

|    |          |           |           |
|----|----------|-----------|-----------|
| 21 | 0.146392 | 1.249192  | -0.779764 |
| 8  | 1.565933 | 2.036505  | -2.163363 |
| 8  | 0.672872 | -1.135018 | 2.988518  |

|    |           |           |           |
|----|-----------|-----------|-----------|
| 8  | -0.210085 | 2.950318  | 0.594105  |
| 16 | 2.805217  | 1.454498  | -1.481131 |
| 16 | -1.419825 | 3.472716  | -0.151492 |
| 16 | -0.271219 | -1.069711 | 1.890648  |
| 8  | 3.771629  | 0.756346  | -2.302930 |
| 8  | 2.197455  | 0.720820  | -0.296295 |
| 8  | -1.503786 | 2.542659  | -1.355203 |
| 8  | -1.550723 | 4.898740  | -0.366484 |
| 8  | -0.297196 | 0.134255  | 1.025579  |
| 8  | -0.201069 | -2.374906 | 1.029287  |
| 6  | -2.007629 | -1.140572 | 2.585851  |
| 6  | 3.627856  | 2.972488  | -0.758708 |
| 6  | -2.875992 | 2.939314  | 0.891216  |
| 9  | 3.861267  | 3.828730  | -1.751525 |
| 9  | 4.768202  | 2.634922  | -0.172861 |
| 9  | 2.801422  | 3.524151  | 0.129983  |
| 9  | -2.874792 | 1.604122  | 1.011834  |
| 9  | -4.004853 | 3.321901  | 0.292006  |
| 9  | -2.791729 | 3.493532  | 2.095633  |
| 9  | -2.873873 | -1.219869 | 1.583479  |
| 9  | -2.109014 | -2.207098 | 3.369908  |
| 9  | -2.211288 | -0.029480 | 3.285021  |
| 8  | -0.521795 | -0.233496 | -1.752250 |
| 6  | -0.009820 | -2.473133 | -1.747152 |
| 6  | 1.476767  | -2.293452 | -1.988773 |
| 1  | 1.708309  | -1.869260 | -2.972744 |
| 1  | 2.039653  | -1.718285 | -1.249023 |
| 6  | 1.632117  | -3.840191 | -1.933067 |
| 6  | 0.075613  | -3.991643 | -1.858826 |
| 1  | -0.293608 | -4.580723 | -1.012667 |
| 1  | -0.370394 | -4.388655 | -2.778826 |
| 6  | -0.964750 | -1.498687 | -1.703228 |
| 6  | -2.419211 | -1.668783 | -1.495558 |
| 6  | -3.007821 | -2.953904 | -1.298796 |
| 6  | -3.223142 | -0.542549 | -1.417050 |
| 6  | -4.345154 | -3.074055 | -1.012321 |
| 1  | -2.398656 | -3.846203 | -1.367289 |
| 6  | -4.602582 | -0.637870 | -1.113772 |
| 1  | -2.791631 | 0.438435  | -1.575512 |
| 6  | -5.182481 | -1.929747 | -0.900065 |
| 1  | -4.781025 | -4.057913 | -0.859790 |
| 6  | -6.561671 | -2.018860 | -0.579284 |
| 1  | -7.002343 | -2.999706 | -0.420939 |
| 6  | -5.420043 | 0.518199  | -0.988146 |
| 1  | -4.971139 | 1.495258  | -1.137356 |
| 6  | -6.754291 | 0.398611  | -0.670518 |
| 1  | -7.372394 | 1.286267  | -0.573974 |
| 6  | -7.330222 | -0.880403 | -0.467118 |
| 1  | -8.384737 | -0.959348 | -0.219551 |
| 1  | 2.092480  | -4.288965 | -2.814200 |
| 6  | 4.933012  | -1.476703 | 0.460356  |
| 6  | 3.915934  | -1.382565 | 1.453282  |
| 6  | 3.914474  | -0.381778 | 2.433054  |
| 6  | 4.957770  | 0.533626  | 2.406598  |
| 6  | 5.979489  | 0.459199  | 1.432733  |
| 6  | 5.973559  | -0.528668 | 0.459519  |
| 6  | 4.617426  | -2.609809 | -0.356002 |
| 6  | 3.451603  | -3.156378 | 0.133950  |
| 1  | 3.119617  | -0.323188 | 3.168501  |
| 1  | 4.988258  | 1.326699  | 3.148180  |

|    |           |           |           |
|----|-----------|-----------|-----------|
| 1  | 6.775283  | 1.198079  | 1.443764  |
| 1  | 6.755343  | -0.574676 | -0.292868 |
| 7  | 3.019888  | -2.401255 | 1.221200  |
| 1  | 2.227999  | -2.633624 | 1.799104  |
| 16 | 2.506193  | -4.525036 | -0.435634 |
| 1  | 5.169857  | -2.978819 | -1.207755 |
| 1  | -0.228970 | -2.247212 | -0.016748 |

-----  
 TS(B-C')  
 -----

Number of imaginary frequencies : 1 Electronic energy : HF=-4347.0879814  
 Zero-point correction= 0.445587 (Hartree/Particle)  
 Thermal correction to Energy= 0.493148  
 Thermal correction to Enthalpy= 0.494092  
 Thermal correction to Gibbs Free Energy= 0.359414  
 Sum of electronic and zero-point Energies= -4346.642394  
 Sum of electronic and thermal Energies= -4346.594834  
 Sum of electronic and thermal Enthalpies= -4346.593890  
 Sum of electronic and thermal Free Energies= -4346.728567

.....  
 Cartesian Coordinates  
 .....

|    |           |           |           |
|----|-----------|-----------|-----------|
| 21 | 0.705884  | 0.853174  | -0.919297 |
| 8  | 0.041505  | -0.594884 | 0.535577  |
| 8  | -2.198496 | 1.839262  | -3.562560 |
| 8  | 0.858033  | 2.066404  | 0.947717  |
| 16 | -0.400555 | -0.893874 | 1.935052  |
| 16 | 2.248353  | 2.594308  | 0.650509  |
| 16 | -1.464876 | 1.949259  | -2.317997 |
| 8  | 0.619303  | -1.174443 | 2.923566  |
| 8  | -1.485181 | -1.988945 | 1.867725  |
| 8  | 2.574125  | 1.954355  | -0.687213 |
| 8  | 3.253574  | 2.517906  | 1.694263  |
| 8  | -1.475635 | 0.767027  | -1.365164 |
| 8  | 0.003155  | 2.328692  | -2.366239 |
| 6  | -2.268254 | 3.303980  | -1.314650 |
| 6  | -1.391532 | 0.607003  | 2.523821  |
| 6  | 1.981841  | 4.402202  | 0.269633  |
| 9  | -0.613292 | 1.394622  | 3.244691  |
| 9  | -2.410727 | 0.171750  | 3.262113  |
| 9  | -1.869665 | 1.266899  | 1.463933  |
| 9  | 1.062258  | 4.528089  | -0.687419 |
| 9  | 3.131075  | 4.934818  | -0.136984 |
| 9  | 1.562486  | 5.015357  | 1.375878  |
| 9  | -1.561174 | 3.513383  | -0.201972 |
| 9  | -2.322547 | 4.422099  | -2.030609 |
| 9  | -3.504287 | 2.915467  | -0.985091 |
| 8  | 1.484150  | -0.546218 | -1.895371 |
| 6  | 0.833405  | -2.762744 | -2.165094 |
| 6  | -0.631285 | -2.459723 | -2.377128 |
| 1  | -0.975867 | -1.436166 | -2.240629 |
| 1  | -1.022695 | -2.859632 | -3.320824 |
| 6  | -0.828016 | -3.476790 | -1.224716 |
| 6  | 0.516906  | -4.151494 | -1.616138 |
| 1  | 0.386647  | -4.913483 | -2.395453 |
| 1  | 1.133414  | -4.546060 | -0.806201 |
| 6  | 1.782249  | -1.869743 | -1.806476 |
| 6  | 3.094018  | -2.211995 | -1.222162 |
| 6  | 3.688391  | -3.490443 | -1.443925 |

|    |           |           |           |
|----|-----------|-----------|-----------|
| 6  | 3.759091  | -1.301404 | -0.417494 |
| 6  | 4.876820  | -3.829140 | -0.843380 |
| 1  | 3.207487  | -4.187534 | -2.121913 |
| 6  | 4.979496  | -1.624661 | 0.222987  |
| 1  | 3.355460  | -0.308224 | -0.267062 |
| 6  | 5.555097  | -2.919464 | 0.013691  |
| 1  | 5.322047  | -4.803295 | -1.029623 |
| 6  | 6.779055  | -3.238247 | 0.657609  |
| 1  | 7.217386  | -4.219902 | 0.495894  |
| 6  | 5.643613  | -0.698717 | 1.073735  |
| 1  | 5.194414  | 0.277943  | 1.236951  |
| 6  | 6.827575  | -1.041387 | 1.687140  |
| 1  | 7.327693  | -0.330566 | 2.338435  |
| 6  | 7.401109  | -2.320586 | 1.475849  |
| 1  | 8.336436  | -2.575712 | 1.965830  |
| 1  | -0.693928 | -2.984933 | -0.263361 |
| 6  | -4.377072 | -1.337098 | 0.449104  |
| 6  | -5.207355 | -2.440502 | 0.739471  |
| 6  | -6.424678 | -2.316549 | 1.405959  |
| 6  | -6.812563 | -1.028177 | 1.771753  |
| 6  | -6.008103 | 0.087300  | 1.476618  |
| 6  | -4.786169 | -0.052184 | 0.821331  |
| 6  | -3.165254 | -1.857295 | -0.179681 |
| 6  | -3.385643 | -3.249196 | -0.345819 |
| 1  | -7.045168 | -3.179549 | 1.626803  |
| 1  | -7.755774 | -0.884671 | 2.289435  |
| 1  | -6.349097 | 1.076633  | 1.766047  |
| 1  | -4.170438 | 0.809720  | 0.589502  |
| 7  | -4.567317 | -3.581333 | 0.239282  |
| 1  | -4.889863 | -4.529176 | 0.371879  |
| 16 | -2.378909 | -4.474889 | -1.080884 |
| 1  | -2.220897 | -1.931294 | 0.971160  |
| 1  | -2.533674 | -1.271576 | -0.834956 |

-----  
C'  
-----

Number of imaginary frequencies : 0 Electronic energy : HF=-4347.1074228  
Zero-point correction= 0.448547 (Hartree/Particle)  
Thermal correction to Energy= 0.496754  
Thermal correction to Enthalpy= 0.497698  
Thermal correction to Gibbs Free Energy= 0.361093  
Sum of electronic and zero-point Energies= -4346.658876  
Sum of electronic and thermal Energies= -4346.610669  
Sum of electronic and thermal Enthalpies= -4346.609725  
Sum of electronic and thermal Free Energies= -4346.746330

.....  
Cartesian Coordinates  
.....

|    |           |           |           |
|----|-----------|-----------|-----------|
| 21 | 1.083581  | 0.480388  | -0.572199 |
| 8  | 1.261127  | -0.617475 | -2.412710 |
| 8  | 2.940748  | -1.077934 | 2.544386  |
| 8  | 2.185601  | 2.208260  | -1.441211 |
| 16 | 1.127901  | -1.966645 | -3.028774 |
| 16 | 0.953089  | 3.079743  | -1.563295 |
| 16 | 2.912422  | -0.138122 | 1.435199  |
| 8  | 1.074447  | -2.049673 | -4.468617 |
| 8  | -0.065547 | -2.791723 | -2.412529 |
| 8  | -0.160229 | 2.153969  | -1.077265 |
| 8  | 0.735506  | 3.822235  | -2.787503 |



|    |           |           |           |
|----|-----------|-----------|-----------|
| 8  | 2.864498  | -0.692037 | 0.026463  |
| 8  | 1.791360  | 0.887502  | 1.447122  |
| 6  | 4.480293  | 0.873970  | 1.498315  |
| 6  | 2.618909  | -2.926853 | -2.408515 |
| 6  | 1.099391  | 4.329346  | -0.181089 |
| 9  | 3.694582  | -2.165892 | -2.543362 |
| 9  | 2.735481  | -4.032025 | -3.133824 |
| 9  | 2.426574  | -3.240907 | -1.129254 |
| 9  | 1.382935  | 3.702286  | 0.964249  |
| 9  | -0.062031 | 4.972453  | -0.057256 |
| 9  | 2.068701  | 5.192101  | -0.469717 |
| 9  | 4.478396  | 1.744241  | 0.492210  |
| 9  | 4.523480  | 1.521634  | 2.659870  |
| 9  | 5.523944  | 0.055566  | 1.391122  |
| 8  | -0.292750 | -0.676049 | -0.099459 |
| 6  | -0.932556 | -2.827760 | 0.448435  |
| 6  | 0.307269  | -3.226269 | 1.228174  |
| 1  | 0.971793  | -3.903212 | 0.680261  |
| 1  | 0.911418  | -2.427919 | 1.660250  |
| 6  | -0.642653 | -4.017187 | 2.180420  |
| 6  | -1.779251 | -3.904156 | 1.111950  |
| 1  | -2.761038 | -3.581744 | 1.467561  |
| 1  | -1.887473 | -4.831125 | 0.536596  |
| 6  | -1.263114 | -1.603787 | -0.041673 |
| 6  | -2.590559 | -1.188470 | -0.537210 |
| 6  | -3.572731 | -2.148397 | -0.921151 |
| 6  | -2.882562 | 0.160032  | -0.644751 |
| 6  | -4.806739 | -1.745051 | -1.368829 |
| 1  | -3.334040 | -3.205512 | -0.887021 |
| 6  | -4.144684 | 0.601940  | -1.109215 |
| 1  | -2.150179 | 0.899064  | -0.344309 |
| 6  | -5.135940 | -0.365407 | -1.472260 |
| 1  | -5.546383 | -2.484077 | -1.665551 |
| 6  | -6.401482 | 0.086843  | -1.929542 |
| 1  | -7.153417 | -0.647814 | -2.206082 |
| 6  | -4.453989 | 1.984889  | -1.218076 |
| 1  | -3.695069 | 2.707919  | -0.934985 |
| 6  | -5.690616 | 2.391980  | -1.664729 |
| 1  | -5.919603 | 3.450555  | -1.745730 |
| 6  | -6.673142 | 1.434322  | -2.022347 |
| 1  | -7.645206 | 1.769539  | -2.372409 |
| 1  | -0.326811 | -5.030109 | 2.443682  |
| 6  | -2.822938 | 0.170018  | 2.795672  |
| 6  | -1.448384 | 0.544606  | 2.746897  |
| 6  | -1.042412 | 1.831601  | 2.367807  |
| 6  | -2.033968 | 2.741421  | 2.020956  |
| 6  | -3.401726 | 2.392285  | 2.068712  |
| 6  | -3.802153 | 1.121153  | 2.455010  |
| 6  | -2.865452 | -1.206376 | 3.186664  |
| 6  | -1.563659 | -1.627422 | 3.354821  |
| 1  | 0.004378  | 2.103340  | 2.339614  |
| 1  | -1.744279 | 3.736880  | 1.697570  |
| 1  | -4.149063 | 3.126455  | 1.784107  |
| 1  | -4.854424 | 0.853498  | 2.472982  |
| 7  | -0.706261 | -0.559603 | 3.102789  |
| 1  | 0.301141  | -0.605544 | 3.135739  |
| 16 | -0.974733 | -3.223836 | 3.817342  |
| 1  | -0.348524 | -2.641470 | -1.441887 |
| 1  | -3.741018 | -1.823228 | 3.326275  |

TS(C-D)

-----  
 Number of imaginary frequencies : 1 Electronic energy : HF=-4347.1016891  
 Zero-point correction= 0.445609 (Hartree/Particle)  
 Thermal correction to Energy= 0.493424  
 Thermal correction to Enthalpy= 0.494369  
 Thermal correction to Gibbs Free Energy= 0.358422  
 Sum of electronic and zero-point Energies= -4346.656080  
 Sum of electronic and thermal Energies= -4346.608265  
 Sum of electronic and thermal Enthalpies= -4346.607321  
 Sum of electronic and thermal Free Energies= -4346.743267

-----  
 Cartesian Coordinates

-----  
 21 0.116297 1.252245 -0.774639  
 8 1.530818 2.067220 -2.144125  
 8 0.719629 -1.079091 2.950476  
 8 -0.259642 2.951860 0.588789  
 16 2.774548 1.489720 -1.464844  
 16 -1.481206 3.453672 -0.152489  
 16 -0.244659 -1.078734 1.866644  
 8 3.750086 0.810942 -2.291599  
 8 2.168383 0.736047 -0.291358  
 8 -1.554396 2.518280 -1.353137  
 8 -1.633879 4.876760 -0.372008  
 8 -0.330969 0.120221 0.989509  
 8 -0.152256 -2.377174 1.020689  
 6 -1.965640 -1.178538 2.592004  
 6 3.579790 3.005917 -0.719300  
 6 -2.926010 2.901828 0.897249  
 9 3.817381 3.873471 -1.701147  
 9 4.715853 2.668733 -0.125542  
 9 2.740831 3.542963 0.166523  
 9 -2.907573 1.567686 1.019597  
 9 -4.061504 3.269893 0.300967  
 9 -2.843949 3.459872 2.099900  
 9 -2.848222 -1.281802 1.604417  
 9 -2.035677 -2.241622 3.385109  
 9 -2.183506 -0.067219 3.287640  
 8 -0.535827 -0.228230 -1.789272  
 6 0.008860 -2.458333 -1.681655  
 6 1.489013 -2.266820 -1.972403  
 1 1.679629 -1.837951 -2.962913  
 1 2.075861 -1.693155 -1.251095  
 6 1.654515 -3.812537 -1.933713  
 6 0.101325 -3.976972 -1.835111  
 1 -0.249560 -4.591796 -0.999888  
 1 -0.356854 -4.348776 -2.759372  
 6 -0.962405 -1.487779 -1.703039  
 6 -2.412356 -1.674701 -1.489133  
 6 -2.981414 -2.963714 -1.262589  
 6 -3.230657 -0.557086 -1.429205  
 6 -4.315375 -3.095617 -0.966805  
 1 -2.359333 -3.848089 -1.312422  
 6 -4.606227 -0.664675 -1.115677  
 1 -2.812420 0.425915 -1.609471  
 6 -5.167142 -1.960106 -0.873344  
 1 -4.737291 -4.081552 -0.790785  
 6 -6.543062 -2.060855 -0.542733

|    |           |           |           |
|----|-----------|-----------|-----------|
| 1  | -6.970045 | -3.043892 | -0.362431 |
| 6  | -5.437681 | 0.483224  | -1.007259 |
| 1  | -5.001939 | 1.462822  | -1.177289 |
| 6  | -6.768169 | 0.352348  | -0.679103 |
| 1  | -7.397465 | 1.233330  | -0.595235 |
| 6  | -7.325534 | -0.930238 | -0.447951 |
| 1  | -8.377399 | -1.018201 | -0.192309 |
| 1  | 2.105456  | -4.251196 | -2.824814 |
| 6  | 4.992492  | -1.459351 | 0.423887  |
| 6  | 3.972029  | -1.350185 | 1.411987  |
| 6  | 3.970783  | -0.338398 | 2.380699  |
| 6  | 5.018987  | 0.571009  | 2.349345  |
| 6  | 6.045318  | 0.480719  | 1.381276  |
| 6  | 6.038465  | -0.517010 | 0.418409  |
| 6  | 4.673264  | -2.598080 | -0.383017 |
| 6  | 3.503029  | -3.133897 | 0.108745  |
| 1  | 3.171721  | -0.267550 | 3.110503  |
| 1  | 5.049820  | 1.372362  | 3.081979  |
| 1  | 6.845102  | 1.215403  | 1.388537  |
| 1  | 6.823779  | -0.575240 | -0.329501 |
| 7  | 3.073453  | -2.367990 | 1.188772  |
| 1  | 2.270888  | -2.582952 | 1.758714  |
| 16 | 2.552753  | -4.502393 | -0.452606 |
| 1  | 5.226569  | -2.978919 | -1.228985 |
| 1  | -0.161373 | -2.271421 | -0.074737 |

-----  
D  
-----

Number of imaginary frequencies : 0    Electronic energy :    HF=-4347.1518187  
Zero-point correction=                    0.451548 (Hartree/Particle)  
Thermal correction to Energy=            0.499563  
Thermal correction to Enthalpy=         0.500507  
Thermal correction to Gibbs Free Energy= 0.363502  
Sum of electronic and zero-point Energies= -4346.700271  
Sum of electronic and thermal Energies= -4346.652256  
Sum of electronic and thermal Enthalpies= -4346.651312  
Sum of electronic and thermal Free Energies= -4346.788316

.....  
Cartesian Coordinates  
.....

|    |           |           |           |
|----|-----------|-----------|-----------|
| 21 | -0.076358 | -0.802400 | -0.226680 |
| 8  | 0.265550  | -2.290757 | -1.815665 |
| 16 | 1.713779  | -1.940101 | -2.068337 |
| 8  | 1.969184  | -0.839179 | -1.044140 |
| 8  | 2.143371  | -1.701095 | -3.433231 |
| 6  | 2.686931  | -3.398141 | -1.419069 |
| 9  | 2.447164  | -3.550792 | -0.117312 |
| 9  | 2.313808  | -4.492282 | -2.078105 |
| 9  | 3.983602  | -3.167217 | -1.612189 |
| 8  | -0.972481 | 0.265131  | -1.727141 |
| 6  | -1.609236 | 1.258955  | -2.176587 |
| 6  | -2.960567 | 1.528836  | -1.703270 |
| 6  | -3.584302 | 0.587030  | -0.886328 |
| 6  | -4.863480 | 0.821205  | -0.346338 |
| 6  | -5.488988 | -0.130094 | 0.506940  |
| 6  | -6.734741 | 0.125209  | 1.031988  |
| 6  | -7.403014 | 1.336625  | 0.722927  |
| 6  | -6.819239 | 2.278921  | -0.098695 |
| 6  | -5.535632 | 2.051147  | -0.652089 |

|    |           |           |           |
|----|-----------|-----------|-----------|
| 6  | -4.883584 | 2.998469  | -1.493668 |
| 6  | -3.637779 | 2.751635  | -2.008071 |
| 1  | -3.155461 | 3.502083  | -2.623491 |
| 1  | -5.389432 | 3.933503  | -1.716710 |
| 1  | -7.335570 | 3.207295  | -0.326279 |
| 1  | -8.386512 | 1.524102  | 1.143853  |
| 1  | -7.210132 | -0.597608 | 1.687488  |
| 1  | -4.957377 | -1.048202 | 0.740864  |
| 1  | -3.085643 | -0.344207 | -0.650944 |
| 6  | -0.901077 | 2.180247  | -3.119168 |
| 1  | -1.600860 | 2.618475  | -3.832296 |
| 6  | 0.442467  | 1.641789  | -3.691112 |
| 1  | 0.668139  | 2.143117  | -4.636512 |
| 1  | 0.554010  | 0.562809  | -3.812594 |
| 6  | 1.163509  | 2.292448  | -2.491229 |
| 1  | 1.229289  | 1.579696  | -1.675582 |
| 6  | -0.050407 | 3.221714  | -2.271473 |
| 1  | 0.033975  | 4.160655  | -2.824516 |
| 1  | -0.356040 | 3.419555  | -1.242081 |
| 16 | 2.850307  | 2.983936  | -2.691380 |
| 6  | 3.353849  | 2.862878  | -1.002270 |
| 6  | 3.516353  | 3.850319  | -0.057281 |
| 6  | 3.826872  | 3.198793  | 1.182825  |
| 6  | 4.068006  | 3.643400  | 2.495703  |
| 6  | 4.274309  | 2.703799  | 3.497360  |
| 6  | 4.242721  | 1.319692  | 3.219044  |
| 6  | 4.020453  | 0.848237  | 1.930645  |
| 6  | 3.828350  | 1.798223  | 0.921217  |
| 7  | 3.590764  | 1.623827  | -0.421932 |
| 1  | 3.336000  | 0.741995  | -0.845739 |
| 1  | 3.989173  | -0.214773 | 1.710437  |
| 1  | 4.392616  | 0.610096  | 4.027642  |
| 1  | 4.453700  | 3.034992  | 4.516182  |
| 1  | 4.080169  | 4.706164  | 2.721118  |
| 1  | 3.410726  | 4.910480  | -0.235323 |
| 8  | 0.830552  | 1.011284  | 0.503976  |
| 16 | -0.332862 | 1.501382  | 1.352775  |
| 8  | -1.344804 | 0.388465  | 1.185674  |
| 8  | -0.784016 | 2.867300  | 1.143855  |
| 6  | 0.292099  | 1.368824  | 3.109269  |
| 9  | -0.750314 | 1.459284  | 3.935246  |
| 9  | 0.897398  | 0.195477  | 3.270737  |
| 9  | 1.141731  | 2.361383  | 3.335968  |
| 8  | 0.244992  | -2.167427 | 1.375349  |
| 16 | -1.139032 | -2.816430 | 1.356083  |
| 8  | -1.871521 | -2.884413 | 2.605106  |
| 8  | -1.802517 | -2.163152 | 0.161555  |
| 6  | -0.810715 | -4.585573 | 0.845730  |
| 9  | -0.104789 | -5.177075 | 1.807743  |
| 9  | -0.134504 | -4.632751 | -0.298958 |
| 9  | -1.983331 | -5.200917 | 0.698793  |

-----  
 TS(C'-D')  
 -----

Number of imaginary frequencies : 1 Electronic energy : HF=-4347.1072555  
 Zero-point correction= 0.446878 (Hartree/Particle)  
 Thermal correction to Energy= 0.494314  
 Thermal correction to Enthalpy= 0.495259  
 Thermal correction to Gibbs Free Energy= 0.360703

|                                              |              |
|----------------------------------------------|--------------|
| Sum of electronic and zero-point Energies=   | -4346.660378 |
| Sum of electronic and thermal Energies=      | -4346.612941 |
| Sum of electronic and thermal Enthalpies=    | -4346.611997 |
| Sum of electronic and thermal Free Energies= | -4346.746553 |

.....  
 Cartesian Coordinates  
 .....

|    |           |           |           |
|----|-----------|-----------|-----------|
| 21 | 1.079369  | 0.543867  | -0.577643 |
| 8  | 1.246360  | -0.628008 | -2.336786 |
| 8  | 2.827976  | -0.844560 | 2.660020  |
| 8  | 2.088668  | 2.308678  | -1.459537 |
| 16 | 1.170404  | -1.982324 | -2.967323 |
| 16 | 0.810910  | 3.109042  | -1.620687 |
| 16 | 2.865336  | 0.020435  | 1.490228  |
| 8  | 1.062071  | -2.028721 | -4.407473 |
| 8  | 0.093896  | -2.887918 | -2.296187 |
| 8  | -0.256755 | 2.128195  | -1.142442 |
| 8  | 0.581945  | 3.818915  | -2.861937 |
| 8  | 2.831411  | -0.624366 | 0.120761  |
| 8  | 1.786733  | 1.085598  | 1.404437  |
| 6  | 4.469323  | 0.974533  | 1.527815  |
| 6  | 2.770746  | -2.814413 | -2.451233 |
| 6  | 0.850503  | 4.385673  | -0.254993 |
| 9  | 3.771045  | -1.966530 | -2.653170 |
| 9  | 2.933372  | -3.906916 | -3.188208 |
| 9  | 2.697176  | -3.142708 | -1.163213 |
| 9  | 1.113306  | 3.790756  | 0.911315  |
| 9  | -0.341888 | 4.977930  | -0.189321 |
| 9  | 1.792547  | 5.285304  | -0.521362 |
| 9  | 4.521341  | 1.773400  | 0.464769  |
| 9  | 4.511855  | 1.697844  | 2.643462  |
| 9  | 5.483129  | 0.113475  | 1.500854  |
| 8  | -0.291238 | -0.598351 | -0.006706 |
| 6  | -0.775748 | -2.827711 | 0.347741  |
| 6  | 0.464423  | -3.171270 | 1.164631  |
| 1  | 1.194904  | -3.776288 | 0.618104  |
| 1  | 0.992284  | -2.347480 | 1.643864  |
| 6  | -0.457622 | -4.056622 | 2.056782  |
| 6  | -1.576918 | -3.970180 | 0.968699  |
| 1  | -2.578189 | -3.707951 | 1.319125  |
| 1  | -1.630616 | -4.882656 | 0.364198  |
| 6  | -1.190048 | -1.577724 | -0.028936 |
| 6  | -2.528066 | -1.224393 | -0.537615 |
| 6  | -3.439557 | -2.220040 | -0.998142 |
| 6  | -2.897329 | 0.109497  | -0.582377 |
| 6  | -4.682536 | -1.865989 | -1.461137 |
| 1  | -3.137933 | -3.261191 | -1.013388 |
| 6  | -4.171660 | 0.500001  | -1.057869 |
| 1  | -2.215276 | 0.871476  | -0.225548 |
| 6  | -5.091838 | -0.504105 | -1.500451 |
| 1  | -5.367883 | -2.629629 | -1.819202 |
| 6  | -6.369778 | -0.103654 | -1.970449 |
| 1  | -7.068179 | -0.865215 | -2.307605 |
| 6  | -4.561149 | 1.866113  | -1.102712 |
| 1  | -3.855203 | 2.616218  | -0.759778 |
| 6  | -5.807976 | 2.222591  | -1.563963 |
| 1  | -6.099119 | 3.268343  | -1.596259 |
| 6  | -6.720016 | 1.228671  | -2.000223 |
| 1  | -7.701074 | 1.523928  | -2.360974 |
| 1  | -0.086268 | -5.059458 | 2.284169  |

|    |           |           |           |
|----|-----------|-----------|-----------|
| 6  | -2.799508 | 0.024919  | 2.826499  |
| 6  | -1.436274 | 0.441775  | 2.827570  |
| 6  | -1.060874 | 1.754632  | 2.510356  |
| 6  | -2.071760 | 2.649845  | 2.181639  |
| 6  | -3.429856 | 2.260594  | 2.188521  |
| 6  | -3.799983 | 0.962335  | 2.509404  |
| 6  | -2.808311 | -1.370918 | 3.144198  |
| 6  | -1.498092 | -1.761281 | 3.321806  |
| 1  | -0.021177 | 2.054116  | 2.506589  |
| 1  | -1.805543 | 3.665666  | 1.903886  |
| 1  | -4.193210 | 2.985910  | 1.924067  |
| 1  | -4.843888 | 0.663708  | 2.492621  |
| 7  | -0.668496 | -0.656730 | 3.145825  |
| 1  | 0.338687  | -0.675996 | 3.215713  |
| 16 | -0.869786 | -3.360702 | 3.719673  |
| 1  | -0.258266 | -2.746449 | -1.291978 |
| 1  | -3.667191 | -2.020308 | 3.229201  |

-----  
D'  
-----

Number of imaginary frequencies : 0 Electronic energy : HF=-4347.1593312  
Zero-point correction= 0.451366 (Hartree/Particle)  
Thermal correction to Energy= 0.499339  
Thermal correction to Enthalpy= 0.500283  
Thermal correction to Gibbs Free Energy= 0.364935  
Sum of electronic and zero-point Energies= -4346.707965  
Sum of electronic and thermal Energies= -4346.659993  
Sum of electronic and thermal Enthalpies= -4346.659048  
Sum of electronic and thermal Free Energies= -4346.794396

.....  
Cartesian Coordinates  
.....

|    |           |           |           |
|----|-----------|-----------|-----------|
| 21 | 1.186503  | 0.075374  | -0.766320 |
| 8  | 0.892056  | -1.036329 | -2.364818 |
| 8  | 3.072235  | -1.222174 | 2.470516  |
| 8  | 2.376181  | 1.573801  | -1.813526 |
| 16 | 0.286528  | -2.343230 | -2.956568 |
| 16 | 1.274313  | 2.615417  | -1.874143 |
| 16 | 3.017939  | -0.386824 | 1.283679  |
| 8  | 0.400731  | -2.371401 | -4.404956 |
| 8  | -0.986764 | -2.669241 | -2.305923 |
| 8  | 0.125645  | 1.914874  | -1.154091 |
| 8  | 0.989543  | 3.269229  | -3.133637 |
| 8  | 2.886261  | -1.068779 | -0.067439 |
| 8  | 1.926394  | 0.668457  | 1.240955  |
| 6  | 4.615100  | 0.578299  | 1.189563  |
| 6  | 1.513754  | -3.571186 | -2.274654 |
| 6  | 1.827329  | 3.953321  | -0.690156 |
| 9  | 2.753180  | -3.241231 | -2.628569 |
| 9  | 1.221251  | -4.788563 | -2.733530 |
| 9  | 1.426841  | -3.579714 | -0.931807 |
| 9  | 2.246977  | 3.410610  | 0.454959  |
| 9  | 0.797547  | 4.766051  | -0.446418 |
| 9  | 2.820457  | 4.636056  | -1.249774 |
| 9  | 4.592282  | 1.367358  | 0.119134  |
| 9  | 4.723907  | 1.315506  | 2.293090  |
| 9  | 5.630287  | -0.275561 | 1.107010  |
| 8  | -0.342304 | -0.807707 | 0.187014  |
| 6  | -1.219242 | -2.915128 | 0.825466  |

|    |           |           |           |
|----|-----------|-----------|-----------|
| 6  | 0.007132  | -3.142234 | 1.747566  |
| 1  | 0.616754  | -3.999084 | 1.455989  |
| 1  | 0.666472  | -2.284101 | 1.869820  |
| 6  | -0.948911 | -3.424836 | 2.938646  |
| 6  | -2.175259 | -3.328157 | 1.991730  |
| 1  | -2.918810 | -2.577662 | 2.263312  |
| 1  | -2.677256 | -4.284665 | 1.825885  |
| 6  | -1.374937 | -1.532139 | 0.261817  |
| 6  | -2.648480 | -1.020621 | -0.210031 |
| 6  | -3.768498 | -1.884674 | -0.411566 |
| 6  | -2.764083 | 0.338413  | -0.490389 |
| 6  | -4.948893 | -1.380884 | -0.889573 |
| 1  | -3.672743 | -2.946427 | -0.218240 |
| 6  | -3.969378 | 0.876267  | -0.985239 |
| 1  | -1.927563 | 1.002839  | -0.310049 |
| 6  | -5.090514 | 0.005480  | -1.188986 |
| 1  | -5.795093 | -2.040573 | -1.058971 |
| 6  | -6.297965 | 0.556434  | -1.685042 |
| 1  | -7.151233 | -0.097706 | -1.841340 |
| 6  | -4.091790 | 2.260360  | -1.288934 |
| 1  | -3.232862 | 2.902947  | -1.125129 |
| 6  | -5.277184 | 2.762547  | -1.773720 |
| 1  | -5.368211 | 3.818449  | -2.008850 |
| 6  | -6.387368 | 1.903118  | -1.969956 |
| 1  | -7.317776 | 2.313117  | -2.351947 |
| 1  | -0.813048 | -4.400420 | 3.412162  |
| 6  | -2.502634 | 1.069761  | 2.835636  |
| 6  | -1.107355 | 1.265598  | 2.611599  |
| 6  | -0.609099 | 2.414087  | 1.983284  |
| 6  | -1.530638 | 3.368874  | 1.571486  |
| 6  | -2.915974 | 3.197373  | 1.788013  |
| 6  | -3.408203 | 2.060773  | 2.413523  |
| 6  | -2.643430 | -0.198905 | 3.480728  |
| 6  | -1.377364 | -0.733057 | 3.623843  |
| 1  | 0.452384  | 2.544299  | 1.820414  |
| 1  | -1.173342 | 4.260724  | 1.067113  |
| 1  | -3.605534 | 3.965040  | 1.450277  |
| 1  | -4.475125 | 1.929628  | 2.568079  |
| 7  | -0.449711 | 0.163576  | 3.109390  |
| 1  | 0.541978  | -0.004916 | 3.033301  |
| 16 | -0.902138 | -2.257887 | 4.370747  |
| 1  | -1.259184 | -3.578193 | -0.045729 |
| 1  | -3.555744 | -0.664554 | 3.823898  |

---

TS(B-E)

---

Number of imaginary frequencies : 1 Electronic energy : HF=-4347.1129719  
Zero-point correction= 0.444689 (Hartree/Particle)  
Thermal correction to Energy= 0.492600  
Thermal correction to Enthalpy= 0.493544  
Thermal correction to Gibbs Free Energy= 0.356711  
Sum of electronic and zero-point Energies= -4346.668283  
Sum of electronic and thermal Energies= -4346.620372  
Sum of electronic and thermal Enthalpies= -4346.619428  
Sum of electronic and thermal Free Energies= -4346.756261

---

Cartesian Coordinates

---

21 -2.014768 -0.372433 -0.015456

|    |           |           |           |
|----|-----------|-----------|-----------|
| 8  | -3.259457 | -1.555594 | 1.368404  |
| 8  | 0.342241  | -0.830890 | -3.666458 |
| 8  | -3.730036 | 0.658003  | -0.938782 |
| 16 | -2.996812 | -2.880814 | 0.682951  |
| 16 | -3.770093 | 1.804051  | 0.050284  |
| 16 | 0.392375  | -0.311788 | -2.306803 |
| 8  | -2.589922 | -4.010037 | 1.502074  |
| 8  | -2.103373 | -2.493875 | -0.484614 |
| 8  | -2.688601 | 1.430863  | 1.050628  |
| 8  | -5.055191 | 2.253257  | 0.546791  |
| 8  | -1.014920 | -0.043120 | -1.729696 |
| 8  | 1.273726  | -0.946531 | -1.319433 |
| 6  | 0.975461  | 1.454848  | -2.439100 |
| 6  | -4.622270 | -3.321325 | -0.119736 |
| 6  | -2.996836 | 3.245749  | -0.850306 |
| 9  | -5.533912 | -3.530506 | 0.827781  |
| 9  | -4.464450 | -4.424522 | -0.848562 |
| 9  | -5.006821 | -2.313663 | -0.902971 |
| 9  | -1.749337 | 2.930122  | -1.211684 |
| 9  | -2.954599 | 4.295580  | -0.019992 |
| 9  | -3.713893 | 3.552995  | -1.925381 |
| 9  | 1.114067  | 1.982255  | -1.208195 |
| 9  | 2.163837  | 1.494335  | -3.054439 |
| 9  | 0.102236  | 2.188719  | -3.127908 |
| 8  | -0.434269 | -0.359498 | 1.101443  |
| 6  | 1.404385  | -1.531312 | 1.851510  |
| 6  | 0.810534  | -2.911153 | 1.569277  |
| 1  | -0.151287 | -3.095497 | 2.059724  |
| 1  | 0.720573  | -3.202554 | 0.519698  |
| 6  | 1.987878  | -3.511584 | 2.392734  |
| 6  | 2.290317  | -2.098580 | 2.979825  |
| 1  | 3.341876  | -1.800865 | 3.031962  |
| 1  | 1.845163  | -1.985145 | 3.973893  |
| 6  | 0.727094  | -0.319031 | 1.670903  |
| 6  | 1.303022  | 1.010314  | 1.937580  |
| 6  | 2.677488  | 1.175693  | 2.283839  |
| 6  | 0.509644  | 2.133610  | 1.758155  |
| 6  | 3.212444  | 2.431359  | 2.434229  |
| 1  | 3.314180  | 0.307301  | 2.402641  |
| 6  | 1.037490  | 3.436951  | 1.897235  |
| 1  | -0.533744 | 2.016793  | 1.493272  |
| 6  | 2.418364  | 3.597334  | 2.246131  |
| 1  | 4.262716  | 2.548944  | 2.687316  |
| 6  | 2.942714  | 4.908915  | 2.375690  |
| 1  | 3.988701  | 5.033879  | 2.643071  |
| 6  | 0.235138  | 4.590067  | 1.675857  |
| 1  | -0.804534 | 4.457324  | 1.390603  |
| 6  | 0.776466  | 5.848890  | 1.805144  |
| 1  | 0.161514  | 6.726982  | 1.632625  |
| 6  | 2.139229  | 6.008352  | 2.161885  |
| 1  | 2.551378  | 7.008185  | 2.262652  |
| 1  | 1.739616  | -4.297523 | 3.109881  |
| 6  | 5.243640  | -1.922649 | -1.217231 |
| 6  | 4.253176  | -1.095755 | -0.669851 |
| 6  | 4.097553  | 0.235185  | -1.030396 |
| 6  | 4.984049  | 0.735112  | -1.988769 |
| 6  | 5.980016  | -0.074239 | -2.547220 |
| 6  | 6.120043  | -1.416503 | -2.166399 |
| 6  | 5.097468  | -3.286934 | -0.587141 |
| 6  | 3.934321  | -3.046727 | 0.363026  |



|    |          |           |           |
|----|----------|-----------|-----------|
| 1  | 3.309508 | 0.842967  | -0.604398 |
| 1  | 4.883765 | 1.765345  | -2.314133 |
| 1  | 6.651292 | 0.341265  | -3.292345 |
| 1  | 6.892891 | -2.038831 | -2.607681 |
| 7  | 3.491739 | -1.823993 | 0.276173  |
| 1  | 2.412608 | -1.465578 | 0.898632  |
| 16 | 3.354758 | -4.294983 | 1.419466  |
| 1  | 5.987316 | -3.623517 | -0.042980 |
| 1  | 4.842079 | -4.071871 | -1.309360 |

-----  
E  
-----

Number of imaginary frequencies : 0 Electronic energy : HF=-4347.13146  
Zero-point correction= 0.449325 (Hartree/Particle)  
Thermal correction to Energy= 0.497934  
Thermal correction to Enthalpy= 0.498878  
Thermal correction to Gibbs Free Energy= 0.358344  
Sum of electronic and zero-point Energies= -4346.682135  
Sum of electronic and thermal Energies= -4346.633526  
Sum of electronic and thermal Enthalpies= -4346.632582  
Sum of electronic and thermal Free Energies= -4346.773116

.....  
Cartesian Coordinates  
.....

|    |           |           |           |
|----|-----------|-----------|-----------|
| 21 | 1.387295  | -1.444480 | -0.088629 |
| 8  | 1.281943  | -3.264203 | -1.284344 |
| 8  | -0.449719 | 0.107010  | 3.405215  |
| 8  | 3.295308  | -1.894340 | 0.839091  |
| 16 | 0.152206  | -3.886433 | -0.480823 |
| 16 | 4.156670  | -1.220065 | -0.215340 |
| 16 | -0.108354 | 0.685976  | 2.115258  |
| 8  | -0.994580 | -4.411534 | -1.195927 |
| 8  | -0.094546 | -2.840939 | 0.601174  |
| 8  | 3.127698  | -0.766496 | -1.240359 |
| 8  | 5.348194  | -1.900773 | -0.676598 |
| 8  | 0.942917  | -0.163522 | 1.351824  |
| 8  | -1.171537 | 1.137959  | 1.209658  |
| 6  | 0.949445  | 2.183443  | 2.447856  |
| 6  | 0.959552  | -5.298945 | 0.435905  |
| 6  | 4.706768  | 0.386721  | 0.567734  |
| 9  | 1.372072  | -6.206335 | -0.445038 |
| 9  | 0.073864  | -5.839120 | 1.267786  |
| 9  | 2.000164  | -4.827999 | 1.123411  |
| 9  | 3.638951  | 1.126079  | 0.875461  |
| 9  | 5.458580  | 1.050753  | -0.316948 |
| 9  | 5.414207  | 0.133619  | 1.661955  |
| 9  | 1.341426  | 2.732419  | 1.291092  |
| 9  | 0.234245  | 3.076451  | 3.135511  |
| 9  | 2.026824  | 1.835312  | 3.152724  |
| 8  | 0.227402  | -0.452004 | -1.407889 |
| 6  | -1.985280 | 0.289833  | -1.700197 |
| 6  | -2.478584 | -1.147474 | -1.984468 |
| 1  | -1.723880 | -1.795883 | -2.435530 |
| 1  | -2.918933 | -1.660414 | -1.129830 |
| 6  | -3.466919 | -0.568555 | -3.039814 |
| 6  | -2.809501 | 0.836708  | -2.906316 |
| 1  | -3.484351 | 1.659908  | -2.669376 |
| 1  | -2.206686 | 1.101521  | -3.779618 |
| 6  | -0.533636 | 0.544130  | -1.580121 |

|    |           |           |           |
|----|-----------|-----------|-----------|
| 6  | 0.030920  | 1.889302  | -1.599304 |
| 6  | -0.800020 | 3.041291  | -1.452933 |
| 6  | 1.410570  | 2.039043  | -1.688777 |
| 6  | -0.236718 | 4.288846  | -1.385406 |
| 1  | -1.871807 | 2.922961  | -1.349198 |
| 6  | 2.011485  | 3.312320  | -1.618212 |
| 1  | 2.040534  | 1.164995  | -1.806553 |
| 6  | 1.174850  | 4.466779  | -1.460558 |
| 1  | -0.866222 | 5.164063  | -1.252298 |
| 6  | 1.786782  | 5.741678  | -1.368700 |
| 1  | 1.158731  | 6.620452  | -1.251674 |
| 6  | 3.424392  | 3.469963  | -1.660575 |
| 1  | 4.047366  | 2.585972  | -1.754353 |
| 6  | 3.986096  | 4.721824  | -1.560465 |
| 1  | 5.064917  | 4.840017  | -1.586842 |
| 6  | 3.159488  | 5.864728  | -1.418360 |
| 1  | 3.616667  | 6.846967  | -1.342818 |
| 1  | -3.363862 | -1.012296 | -4.033702 |
| 6  | -6.620082 | 0.497342  | 0.827299  |
| 6  | -5.242622 | 0.783634  | 0.841814  |
| 6  | -4.616273 | 1.339599  | 1.953027  |
| 6  | -5.416103 | 1.619706  | 3.067193  |
| 6  | -6.789148 | 1.349036  | 3.059262  |
| 6  | -7.406065 | 0.780185  | 1.934276  |
| 6  | -6.922723 | -0.118407 | -0.516627 |
| 6  | -5.528758 | -0.084695 | -1.140058 |
| 1  | -3.547110 | 1.526464  | 1.946569  |
| 1  | -4.961142 | 2.049070  | 3.955047  |
| 1  | -7.385416 | 1.575426  | 3.938302  |
| 1  | -8.471233 | 0.565335  | 1.939901  |
| 7  | -4.618728 | 0.426293  | -0.378515 |
| 1  | -2.440022 | 0.649572  | -0.769481 |
| 16 | -5.274324 | -0.721534 | -2.756066 |
| 1  | -7.641039 | 0.455427  | -1.114664 |
| 1  | -7.302908 | -1.144752 | -0.450725 |

-----  
 $E_{\text{free}}$   
 -----

Number of imaginary frequencies : 0 Electronic energy : HF=-1416.094461  
 Zero-point correction= 0.360438 (Hartree/Particle)  
 Thermal correction to Energy= 0.381318  
 Thermal correction to Enthalpy= 0.382262  
 Thermal correction to Gibbs Free Energy= 0.307404  
 Sum of electronic and zero-point Energies= -1415.734023  
 Sum of electronic and thermal Energies= -1415.713143  
 Sum of electronic and thermal Enthalpies= -1415.712199  
 Sum of electronic and thermal Free Energies= -1415.787057

-----  
 Cartesian Coordinates  
 -----

|   |           |           |           |
|---|-----------|-----------|-----------|
| 8 | 1.839257  | -2.505570 | 1.484685  |
| 6 | 0.043300  | -1.201066 | 0.583301  |
| 6 | -0.973983 | -2.265737 | 1.056739  |
| 1 | -0.518823 | -3.105730 | 1.584769  |
| 1 | -1.793744 | -1.852157 | 1.642699  |
| 6 | -1.330700 | -2.570042 | -0.423839 |
| 6 | -0.360004 | -1.460280 | -0.911052 |
| 1 | -0.844938 | -0.605593 | -1.381019 |
| 1 | 0.443218  | -1.823270 | -1.558795 |

|    |           |           |           |
|----|-----------|-----------|-----------|
| 6  | 1.500363  | -1.493921 | 0.884303  |
| 6  | 2.525498  | -0.517492 | 0.386892  |
| 6  | 2.176535  | 0.654612  | -0.343479 |
| 6  | 3.859396  | -0.778710 | 0.649720  |
| 6  | 3.149556  | 1.520118  | -0.784269 |
| 1  | 1.135857  | 0.869505  | -0.560539 |
| 6  | 4.883419  | 0.094085  | 0.212655  |
| 1  | 4.109751  | -1.677502 | 1.205638  |
| 6  | 4.524283  | 1.272371  | -0.522549 |
| 1  | 2.875935  | 2.411549  | -1.342758 |
| 6  | 5.553257  | 2.146949  | -0.961695 |
| 1  | 5.280549  | 3.039580  | -1.518723 |
| 6  | 6.257323  | -0.161027 | 0.478605  |
| 1  | 6.523224  | -1.055155 | 1.036145  |
| 6  | 7.230687  | 0.706644  | 0.039006  |
| 1  | 8.277088  | 0.503525  | 0.246788  |
| 6  | 6.874499  | 1.871030  | -0.687712 |
| 1  | 7.652726  | 2.547630  | -1.028929 |
| 1  | -1.025207 | -3.571660 | -0.739814 |
| 6  | -5.050033 | 0.891883  | -0.202559 |
| 6  | -3.741790 | 1.118203  | 0.266113  |
| 6  | -3.379359 | 2.331666  | 0.843170  |
| 6  | -4.359013 | 3.326392  | 0.943926  |
| 6  | -5.660016 | 3.106748  | 0.479258  |
| 6  | -6.017335 | 1.879927  | -0.101016 |
| 6  | -5.073681 | -0.510815 | -0.752628 |
| 6  | -3.625125 | -0.919670 | -0.491942 |
| 1  | -2.367080 | 2.489645  | 1.201120  |
| 1  | -4.105124 | 4.283545  | 1.390398  |
| 1  | -6.402607 | 3.894049  | 0.568879  |
| 1  | -7.029862 | 1.715294  | -0.459574 |
| 7  | -2.901629 | -0.005737 | 0.072455  |
| 1  | -0.218115 | -0.188809 | 0.900366  |
| 16 | -3.084277 | -2.519151 | -0.960300 |
| 1  | -5.315908 | -0.559928 | -1.821013 |
| 1  | -5.773621 | -1.174594 | -0.231197 |

-----  
 TS(E<sub>free</sub>-G)  
 -----

Number of imaginary frequencies : 1 Electronic energy : HF=-2832.1629527  
 Zero-point correction= 0.718974 (Hartree/Particle)  
 Thermal correction to Energy= 0.761697  
 Thermal correction to Enthalpy= 0.762641  
 Thermal correction to Gibbs Free Energy= 0.638806  
 Sum of electronic and zero-point Energies= -2831.443979  
 Sum of electronic and thermal Energies= -2831.401256  
 Sum of electronic and thermal Enthalpies= -2831.400311  
 Sum of electronic and thermal Free Energies= -2831.524147

-----  
 Cartesian Coordinates  
 -----

|    |           |           |           |
|----|-----------|-----------|-----------|
| 16 | -0.465670 | -0.856984 | -1.421225 |
| 6  | 0.363313  | 0.573330  | -0.877439 |
| 6  | 0.390203  | 1.886059  | -1.618117 |
| 6  | 1.525276  | 2.599176  | -0.928754 |
| 6  | 2.130324  | 3.829432  | -1.142676 |
| 6  | 3.169851  | 4.218452  | -0.286301 |
| 6  | 3.582200  | 3.398264  | 0.771278  |
| 6  | 2.969667  | 2.160801  | 1.001355  |

|    |           |           |           |
|----|-----------|-----------|-----------|
| 6  | 1.950858  | 1.793521  | 0.133273  |
| 7  | 1.201399  | 0.586851  | 0.156166  |
| 1  | 3.272504  | 1.517770  | 1.820862  |
| 1  | 4.388460  | 3.723335  | 1.421278  |
| 1  | 3.663621  | 5.172230  | -0.444979 |
| 1  | 1.809548  | 4.477799  | -1.952097 |
| 1  | 0.515101  | 1.746391  | -2.695686 |
| 6  | 0.866227  | -2.154201 | -1.371917 |
| 1  | 0.419177  | -2.916699 | -2.016044 |
| 6  | 2.297469  | -1.699070 | -1.771873 |
| 1  | 2.747378  | -2.376606 | -2.503212 |
| 1  | 2.417530  | -0.673203 | -2.128099 |
| 6  | 2.769441  | -1.983074 | -0.307987 |
| 6  | 4.049810  | -2.782057 | -0.197270 |
| 8  | 4.034106  | -3.999522 | -0.076940 |
| 6  | 5.338902  | -2.025548 | -0.292907 |
| 6  | 5.381069  | -0.648487 | -0.441786 |
| 6  | 6.613124  | 0.047518  | -0.520751 |
| 6  | 6.666535  | 1.461650  | -0.659650 |
| 6  | 7.878347  | 2.111285  | -0.729801 |
| 6  | 9.088070  | 1.375603  | -0.664657 |
| 6  | 9.066866  | 0.004434  | -0.528059 |
| 6  | 7.835501  | -0.697136 | -0.451404 |
| 6  | 7.767051  | -2.112016 | -0.305807 |
| 6  | 6.558783  | -2.757868 | -0.228413 |
| 1  | 6.496751  | -3.834746 | -0.114518 |
| 1  | 8.694670  | -2.676319 | -0.254675 |
| 1  | 9.995095  | -0.558493 | -0.476350 |
| 1  | 10.037281 | 1.900442  | -0.721808 |
| 1  | 7.912820  | 3.191721  | -0.835022 |
| 1  | 5.734656  | 2.020053  | -0.702370 |
| 1  | 4.470054  | -0.061605 | -0.500741 |
| 1  | 2.858729  | -1.054927 | 0.253013  |
| 6  | 1.421302  | -2.678953 | -0.018709 |
| 1  | 1.518776  | -3.767816 | -0.018496 |
| 1  | 0.901052  | -2.364842 | 0.887434  |
| 16 | -0.977529 | -1.807999 | 2.954512  |
| 6  | -1.104103 | -0.191651 | 2.230230  |
| 6  | -0.108045 | 0.812820  | 2.544811  |
| 6  | -0.631685 | 2.015721  | 1.952443  |
| 6  | -0.211128 | 3.353660  | 1.881665  |
| 6  | -0.912966 | 4.239343  | 1.067013  |
| 6  | -2.021042 | 3.808975  | 0.308979  |
| 6  | -2.465478 | 2.485695  | 0.373404  |
| 6  | -1.773750 | 1.593150  | 1.200491  |
| 7  | -2.049095 | 0.244281  | 1.405516  |
| 1  | -3.316369 | 2.145635  | -0.209382 |
| 1  | -2.548012 | 4.521410  | -0.320006 |
| 1  | -0.595460 | 5.276350  | 1.005811  |
| 1  | 0.659358  | 3.691567  | 2.436909  |
| 1  | 0.613081  | 0.745652  | 3.352005  |
| 6  | -2.313412 | -2.886891 | 2.284152  |
| 1  | -2.309593 | -3.695169 | 3.021574  |
| 6  | -3.696134 | -2.241648 | 1.999469  |
| 1  | -4.506468 | -2.918035 | 2.290615  |
| 1  | -3.879687 | -1.245581 | 2.400942  |
| 6  | -3.365270 | -2.330507 | 0.474860  |
| 6  | -4.485915 | -2.720205 | -0.450517 |
| 8  | -4.570304 | -3.843383 | -0.933827 |
| 6  | -5.515481 | -1.670090 | -0.740890 |

|   |           |           |           |
|---|-----------|-----------|-----------|
| 6 | -5.420691 | -0.389278 | -0.220767 |
| 6 | -6.406519 | 0.589933  | -0.507174 |
| 6 | -6.330866 | 1.906428  | 0.025563  |
| 6 | -7.297311 | 2.840924  | -0.272863 |
| 6 | -8.384316 | 2.498900  | -1.115116 |
| 6 | -8.487617 | 1.229619  | -1.642102 |
| 6 | -7.508802 | 0.242506  | -1.355151 |
| 6 | -7.580519 | -1.080629 | -1.876460 |
| 6 | -6.616142 | -2.009914 | -1.577201 |
| 1 | -6.660061 | -3.021346 | -1.967290 |
| 1 | -8.417780 | -1.343666 | -2.518264 |
| 1 | -9.323372 | 0.966812  | -2.285673 |
| 1 | -9.140910 | 3.244472  | -1.342812 |
| 1 | -7.231352 | 3.843672  | 0.139169  |
| 1 | -5.497236 | 2.160945  | 0.674628  |
| 1 | -4.585103 | -0.104207 | 0.412551  |
| 1 | -2.932268 | -1.373877 | 0.178494  |
| 6 | -2.248270 | -3.339567 | 0.798119  |
| 1 | -2.593021 | -4.371273 | 0.679788  |
| 1 | -1.298810 | -3.216501 | 0.274900  |
| 1 | -0.563743 | 2.422174  | -1.454448 |
| 1 | 0.819891  | 0.301070  | 1.166262  |

---

TS(E<sub>free</sub>-H)

---

Number of imaginary frequencies : 1 Electronic energy : HF=-1416.0184744  
Zero-point correction= 0.355750 (Hartree/Particle)  
Thermal correction to Energy= 0.376579  
Thermal correction to Enthalpy= 0.377523  
Thermal correction to Gibbs Free Energy= 0.301311  
Sum of electronic and zero-point Energies= -1415.662724  
Sum of electronic and thermal Energies= -1415.641896  
Sum of electronic and thermal Enthalpies= -1415.640952  
Sum of electronic and thermal Free Energies= -1415.717163

.....  
Cartesian Coordinates

|    |           |           |           |
|----|-----------|-----------|-----------|
| 16 | -2.223950 | -2.389761 | -0.553209 |
| 8  | 0.615484  | 1.746472  | 0.560953  |
| 7  | -4.111182 | -0.548282 | -1.412870 |
| 1  | -4.626810 | -2.121079 | -0.026040 |
| 6  | -5.031849 | 0.263795  | -0.846242 |
| 6  | -5.785564 | 1.281406  | -1.491873 |
| 1  | -5.625595 | 1.477992  | -2.546774 |
| 6  | -6.693944 | 1.994170  | -0.744131 |
| 1  | -7.272314 | 2.784785  | -1.214247 |
| 6  | -6.907498 | 1.725323  | 0.641936  |
| 1  | -7.637219 | 2.318945  | 1.184704  |
| 6  | -6.212427 | 0.731385  | 1.292358  |
| 1  | -6.380729 | 0.524162  | 2.345226  |
| 6  | -5.252354 | -0.004801 | 0.554179  |
| 6  | -4.367911 | -1.049927 | 0.875339  |
| 1  | -4.153571 | -1.530588 | 1.820345  |
| 6  | -3.695699 | -1.379406 | -0.414851 |
| 6  | -1.000990 | -1.074546 | -0.186526 |
| 1  | -1.176840 | -0.254638 | -0.886634 |
| 6  | -0.826962 | -0.554130 | 1.262805  |
| 1  | -1.253072 | 0.426054  | 1.480814  |
| 1  | -1.153514 | -1.288131 | 2.004067  |

|   |          |           |           |
|---|----------|-----------|-----------|
| 6 | 0.707186 | -0.597348 | 1.051337  |
| 1 | 1.294509 | -1.043845 | 1.859505  |
| 6 | 0.478927 | -1.526664 | -0.192824 |
| 1 | 0.598753 | -2.581167 | 0.074545  |
| 1 | 1.059136 | -1.319854 | -1.095440 |
| 6 | 1.311622 | 0.745112  | 0.659935  |
| 6 | 2.777571 | 0.804778  | 0.362196  |
| 6 | 3.336440 | 2.068663  | 0.015832  |
| 1 | 2.672096 | 2.925389  | -0.009346 |
| 6 | 4.671761 | 2.187341  | -0.274317 |
| 1 | 5.092578 | 3.154965  | -0.535318 |
| 6 | 5.532234 | 1.053920  | -0.243240 |
| 6 | 4.977784 | -0.222759 | 0.098946  |
| 6 | 3.594303 | -0.312349 | 0.398198  |
| 1 | 3.190258 | -1.288062 | 0.650549  |
| 6 | 6.917287 | 1.140977  | -0.540304 |
| 1 | 7.337195 | 2.109323  | -0.799486 |
| 6 | 7.717486 | 0.019922  | -0.502569 |
| 1 | 8.775951 | 0.100008  | -0.732548 |
| 6 | 7.169537 | -1.242672 | -0.165577 |
| 1 | 7.812327 | -2.117564 | -0.140513 |
| 6 | 5.829734 | -1.360159 | 0.128264  |
| 1 | 5.404429 | -2.326505 | 0.387179  |

-----  
 TS(E-F)  
 -----

Number of imaginary frequencies : 1 Electronic energy : HF=-4347.0599774  
 Zero-point correction= 0.444969 (Hartree/Particle)  
 Thermal correction to Energy= 0.493238  
 Thermal correction to Enthalpy= 0.494183  
 Thermal correction to Gibbs Free Energy= 0.354543  
 Sum of electronic and zero-point Energies= -4346.615008  
 Sum of electronic and thermal Energies= -4346.566739  
 Sum of electronic and thermal Enthalpies= -4346.565795  
 Sum of electronic and thermal Free Energies= -4346.705435

-----  
 Cartesian Coordinates  
 -----

|    |           |           |           |
|----|-----------|-----------|-----------|
| 21 | -1.328408 | 1.429403  | -0.109672 |
| 8  | -1.291741 | 3.238862  | -1.325356 |
| 8  | 0.753552  | -0.153020 | 3.248208  |
| 8  | -3.201142 | 1.881013  | 0.889160  |
| 16 | -0.139343 | 3.881771  | -0.571294 |
| 16 | -4.101428 | 1.201094  | -0.128393 |
| 16 | 0.264589  | -0.720476 | 1.998521  |
| 8  | 0.969514  | 4.420804  | -1.333380 |
| 8  | 0.164208  | 2.845162  | 0.505242  |
| 8  | -3.111874 | 0.734061  | -1.185064 |
| 8  | -5.306644 | 1.882127  | -0.552274 |
| 8  | -0.817744 | 0.171676  | 1.335898  |
| 8  | 1.223324  | -1.216326 | 1.007334  |
| 6  | -0.812827 | -2.176522 | 2.435042  |
| 6  | -0.929562 | 5.287014  | 0.371338  |
| 6  | -4.628961 | -0.396455 | 0.686540  |
| 9  | -1.391825 | 6.183476  | -0.496159 |
| 9  | -0.018704 | 5.844976  | 1.163336  |
| 9  | -1.933978 | 4.805004  | 1.103902  |
| 9  | -3.552219 | -1.129007 | 0.979267  |
| 9  | -5.397964 | -1.074419 | -0.172967 |

|    |           |           |           |
|----|-----------|-----------|-----------|
| 9  | -5.312944 | -0.132815 | 1.793197  |
| 9  | -1.297672 | -2.730811 | 1.316121  |
| 9  | -0.078663 | -3.079721 | 3.088106  |
| 9  | -1.828603 | -1.784651 | 3.205352  |
| 8  | -0.235419 | 0.419358  | -1.463522 |
| 6  | 1.974444  | -0.237810 | -1.859724 |
| 6  | 2.377654  | 1.206609  | -2.237436 |
| 1  | 1.611263  | 1.731974  | -2.813804 |
| 1  | 2.701700  | 1.834261  | -1.408308 |
| 6  | 3.490863  | 0.613472  | -3.150445 |
| 6  | 2.850825  | -0.799341 | -3.017489 |
| 1  | 3.525299  | -1.621606 | -2.765972 |
| 1  | 2.276177  | -1.077234 | -3.905942 |
| 6  | 0.539751  | -0.554648 | -1.694678 |
| 6  | -0.000842 | -1.909072 | -1.715071 |
| 6  | 0.854554  | -3.049773 | -1.651354 |
| 6  | -1.381125 | -2.080093 | -1.705464 |
| 6  | 0.317143  | -4.307806 | -1.567864 |
| 1  | 1.928485  | -2.914713 | -1.619899 |
| 6  | -1.956102 | -3.363803 | -1.614179 |
| 1  | -2.031082 | -1.214246 | -1.757206 |
| 6  | -1.093227 | -4.507459 | -1.542190 |
| 1  | 0.967669  | -5.174974 | -1.497976 |
| 6  | -1.677862 | -5.793613 | -1.430530 |
| 1  | -1.030091 | -6.664293 | -1.378268 |
| 6  | -3.365882 | -3.543190 | -1.552843 |
| 1  | -4.007045 | -2.667587 | -1.581203 |
| 6  | -3.899979 | -4.805577 | -1.435954 |
| 1  | -4.975854 | -4.940659 | -1.383306 |
| 6  | -3.048425 | -5.937652 | -1.379643 |
| 1  | -3.484302 | -6.928331 | -1.289714 |
| 1  | 3.511694  | 1.012896  | -4.168061 |
| 6  | 6.273977  | -0.775948 | 0.882655  |
| 6  | 4.904418  | -0.361064 | 1.062465  |
| 6  | 4.279511  | -0.497414 | 2.331036  |
| 6  | 5.033089  | -1.003725 | 3.365013  |
| 6  | 6.391265  | -1.408943 | 3.188904  |
| 6  | 7.012975  | -1.317157 | 1.964304  |
| 6  | 6.562094  | -0.553181 | -0.476839 |
| 6  | 5.294799  | -0.025130 | -1.048499 |
| 1  | 3.243477  | -0.208092 | 2.461612  |
| 1  | 4.583089  | -1.105728 | 4.348489  |
| 1  | 6.935832  | -1.802225 | 4.042285  |
| 1  | 8.042982  | -1.634216 | 1.829605  |
| 7  | 4.340524  | 0.102250  | -0.075435 |
| 1  | 2.443884  | -0.474938 | -0.890834 |
| 16 | 5.240378  | 0.821029  | -2.623586 |
| 1  | 5.535256  | -1.231140 | -1.233477 |
| 1  | 7.476818  | -0.705392 | -1.034761 |

-----  
3a  
-----

Number of imaginary frequencies : 0 Electronic energy : HF=-1416.1065832  
Zero-point correction= 0.361592 (Hartree/Particle)  
Thermal correction to Energy= 0.382413  
Thermal correction to Enthalpy= 0.383357  
Thermal correction to Gibbs Free Energy= 0.309841  
Sum of electronic and zero-point Energies= -1415.744992  
Sum of electronic and thermal Energies= -1415.724171

Sum of electronic and thermal Enthalpies= -1415.723226  
Sum of electronic and thermal Free Energies= -1415.796742

.....  
Cartesian Coordinates  
.....

|    |           |           |           |
|----|-----------|-----------|-----------|
| 16 | 4.339606  | -0.440696 | 0.698442  |
| 6  | 3.133996  | 0.806737  | 0.397823  |
| 6  | 2.330184  | 1.481269  | 1.290625  |
| 6  | 1.448168  | 2.315714  | 0.530416  |
| 6  | 0.413288  | 3.210305  | 0.863635  |
| 6  | -0.271149 | 3.857140  | -0.156793 |
| 6  | 0.056003  | 3.632725  | -1.512652 |
| 6  | 1.077086  | 2.763697  | -1.875180 |
| 6  | 1.766041  | 2.111465  | -0.844924 |
| 7  | 2.797053  | 1.200554  | -0.894511 |
| 1  | 3.257204  | 0.860434  | -1.723772 |
| 1  | 1.328962  | 2.592155  | -2.917519 |
| 1  | -0.502559 | 4.150145  | -2.286676 |
| 1  | -1.073138 | 4.547776  | 0.086569  |
| 1  | 0.157324  | 3.387167  | 1.904422  |
| 1  | 2.370374  | 1.374124  | 2.364583  |
| 6  | 3.324821  | -1.990139 | 0.551881  |
| 1  | 4.010283  | -2.760059 | 0.917612  |
| 6  | 1.918618  | -1.943678 | 1.204373  |
| 1  | 1.658051  | -2.912031 | 1.642356  |
| 1  | 1.716928  | -1.148569 | 1.924035  |
| 6  | 1.299917  | -1.774288 | -0.224295 |
| 6  | 0.063583  | -2.605413 | -0.495867 |
| 8  | 0.170637  | -3.780572 | -0.827894 |
| 6  | -1.282396 | -1.985749 | -0.293883 |
| 6  | -1.454254 | -0.656364 | 0.057456  |
| 6  | -2.749599 | -0.104195 | 0.229480  |
| 6  | -2.938452 | 1.262382  | 0.571962  |
| 6  | -4.206772 | 1.773894  | 0.732259  |
| 6  | -5.340440 | 0.942108  | 0.557474  |
| 6  | -5.188008 | -0.385804 | 0.221067  |
| 6  | -3.895515 | -0.944723 | 0.046295  |
| 6  | -3.692664 | -2.308681 | -0.308422 |
| 6  | -2.428843 | -2.813645 | -0.476062 |
| 1  | -2.264313 | -3.849968 | -0.750123 |
| 1  | -4.561748 | -2.946856 | -0.447147 |
| 1  | -6.057721 | -1.023053 | 0.083450  |
| 1  | -6.335508 | 1.357987  | 0.687700  |
| 1  | -4.343388 | 2.819832  | 0.991431  |
| 1  | -2.064466 | 1.896009  | 0.691859  |
| 1  | -0.604411 | 0.001288  | 0.211483  |
| 1  | 1.131522  | -0.720989 | -0.442125 |
| 6  | 2.644190  | -2.258896 | -0.816711 |
| 1  | 2.600863  | -3.328155 | -1.042041 |
| 1  | 3.030757  | -1.720574 | -1.686184 |

-----  
3a'  
-----

Number of imaginary frequencies : 0 Electronic energy : HF=-1416.0999872  
Zero-point correction= 0.360906 (Hartree/Particle)  
Thermal correction to Energy= 0.382081  
Thermal correction to Enthalpy= 0.383025  
Thermal correction to Gibbs Free Energy= 0.306413  
Sum of electronic and zero-point Energies= -1415.739081



Sum of electronic and thermal Energies= -1415.717906  
 Sum of electronic and thermal Enthalpies= -1415.716962  
 Sum of electronic and thermal Free Energies= -1415.793574

.....  
 Cartesian Coordinates  
 .....

|    |           |           |           |
|----|-----------|-----------|-----------|
| 8  | -2.219356 | 3.267276  | 0.687224  |
| 7  | 3.295039  | -0.076645 | 0.982680  |
| 1  | 2.616668  | -0.023123 | 1.725431  |
| 6  | 4.126117  | -1.139920 | 0.710196  |
| 6  | 4.188053  | -2.414983 | 1.284944  |
| 1  | 3.515653  | -2.704318 | 2.087499  |
| 6  | 5.143020  | -3.294387 | 0.789558  |
| 1  | 5.219357  | -4.291415 | 1.213482  |
| 6  | 6.016470  | -2.917618 | -0.254150 |
| 1  | 6.749098  | -3.633279 | -0.615527 |
| 6  | 5.953378  | -1.652167 | -0.821012 |
| 1  | 6.629243  | -1.368407 | -1.622779 |
| 6  | 4.999650  | -0.735775 | -0.341117 |
| 6  | 4.656172  | 0.615357  | -0.673900 |
| 1  | 5.108586  | 1.241372  | -1.429113 |
| 6  | 3.619996  | 0.990815  | 0.150193  |
| 6  | 1.283412  | 2.093831  | -0.797689 |
| 6  | 0.173164  | 3.168708  | -0.884513 |
| 1  | 0.096654  | 3.773347  | 0.023307  |
| 1  | 0.180879  | 3.826960  | -1.755619 |
| 6  | -0.871982 | 2.028220  | -0.844858 |
| 1  | -1.178858 | 1.715065  | -1.848144 |
| 6  | 0.237291  | 1.077993  | -0.279216 |
| 1  | 0.290158  | 0.056770  | -0.664148 |
| 1  | 0.208038  | 1.050745  | 0.814406  |
| 6  | -2.091308 | 2.238613  | 0.037323  |
| 6  | -3.107027 | 1.144282  | 0.129722  |
| 6  | -4.238361 | 1.351731  | 0.970548  |
| 1  | -4.310602 | 2.297260  | 1.496674  |
| 6  | -5.198257 | 0.381078  | 1.103342  |
| 1  | -6.060131 | 0.545791  | 1.744874  |
| 6  | -5.089124 | -0.857676 | 0.410445  |
| 6  | -3.952886 | -1.076231 | -0.435512 |
| 6  | -2.979204 | -0.051873 | -0.554999 |
| 1  | -2.123493 | -0.235278 | -1.197343 |
| 6  | -6.062402 | -1.883885 | 0.527447  |
| 1  | -6.924059 | -1.717589 | 1.168599  |
| 6  | -5.920197 | -3.070829 | -0.157837 |
| 1  | -6.672178 | -3.848313 | -0.059480 |
| 6  | -4.796639 | -3.287638 | -0.993560 |
| 1  | -4.697893 | -4.228174 | -1.527273 |
| 6  | -3.835235 | -2.311522 | -1.128658 |
| 1  | -2.971463 | -2.472873 | -1.768676 |
| 16 | 2.739658  | 2.514264  | 0.246427  |
| 1  | 1.654774  | 1.808801  | -1.785731 |

## 8. Synthesis and Characterization of Substituted Cyclobutane Derivatives

### 3-((1*H*-Indol-2-yl)thio)cyclobutyl)naphthalen-2-yl)methanone (**3a**)

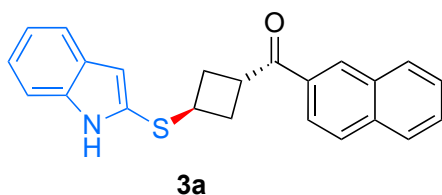

Following the general procedure, treatment of indoline-2-thione **1a** (0.030 g, 0.2 mmol) and bicyclo[1.1.0]butan-1-yl(naphthalen-2-yl)methanone **2a** (0.050 g, 0.24 mmol) with Sc(OTf)<sub>3</sub> (0.005 g, 0.01 mmol) in CH<sub>2</sub>Cl<sub>2</sub> (4.0 mL) at 25 °C for 12 h followed by flash column chromatography (Pet. ether/ EtOAc = 90/10) of the crude reaction mixture using silica gel afforded 3-((1*H*-indol-2-yl)thio)cyclobutyl)naphthalen-2-yl)methanone **3a** as purple solid (0.050 g, 70% yield).

**R<sub>f</sub>** (Pet. ether /EtOAc = 90/10): 0.34; **<sup>1</sup>H NMR (400 MHz, CDCl<sub>3</sub>)** δ 8.31 (s, 1H), 8.27 (s, 1H), 7.97 – 7.85 (m, 4H), 7.63 – 7.53 (m, 3H), 7.37 (d, *J* = 8.1 Hz, 1H), 7.26 – 7.21 (m, 1H), 7.17 – 7.13 (m, 1H), 6.75 – 6.75 (m, 1H), 4.19 – 4.11 (m, 1H), 3.87 – 3.79 (m, 1H), 2.87 – 2.80 (m, 2H), 2.52 – 2.44 (m, 2H). **<sup>13</sup>C NMR (100 MHz, CDCl<sub>3</sub>)** δ 200.3, 137.3, 135.7, 132.6, 132.6, 130.1, 129.7, 128.7, 128.7, 128.7, 127.9, 126.9, 126.8, 124.1, 123.0, 120.5, 120.3, 110.8, 110.3, 39.8, 38.2, 32.4. **HRMS (ESI)** *m/z*: [M+H]<sup>+</sup> calcd for C<sub>23</sub>H<sub>20</sub>NOS 358.1260; found 358.1269. **FTIR (cm<sup>-1</sup>)** 3342, 1668, 1442, 1346, 1224, 1127.

### 3-((1*H*-Indol-2-yl)thio)cyclobutyl(phenyl)methanone (**3b**)

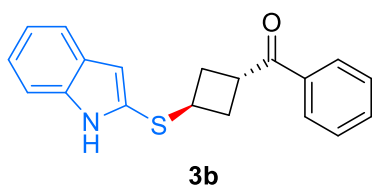

Following the general procedure, treatment of indoline-2-thione **1a** (0.030 g, 0.2 mmol) and bicyclo[1.1.0]butan-1-yl(phenyl)methanone **2b** (0.038 g, 0.24 mmol) with Sc(OTf)<sub>3</sub> (0.005 g, 0.01 mmol) in CH<sub>2</sub>Cl<sub>2</sub> (4.0 mL) at 25 °C for 12 h followed by flash column chromatography (Pet. ether/ EtOAc = 90/10) of the crude reaction mixture using silica gel afforded 3-((1*H*-indol-2-yl)thio)cyclobutyl(phenyl)methanone **3b** as greenish sticky solid (0.037 g, 61% yield).

**R<sub>f</sub>** (Pet. ether /EtOAc = 90/10): 0.34; **<sup>1</sup>H NMR (400 MHz, CDCl<sub>3</sub>)** δ 8.16 (s, 1H), 7.84 (d, *J* = 7.5 Hz, 2H), 7.60 – 7.53 (m, 2H), 7.44 (t, *J* = 7.6 Hz, 2H), 7.35 (d, *J* = 8.1 Hz, 1H), 7.22 (t, *J* = 7.5 Hz, 1H), 7.12 (t, *J* = 7.5 Hz, 1H), 6.72 (s, 1H), 4.05 – 3.97 (m, 1H), 3.82 – 3.74 (m, 1H), 2.81 – 2.74 (m, 2H), 2.45 – 2.37 (m, 2H). **<sup>13</sup>C NMR (100 MHz, CDCl<sub>3</sub>)** δ 200.2, 137.3, 135.3, 133.4, 128.8, 128.7, 128.5, 126.9, 123.0, 120.5, 120.4, 110.8, 110.3, 39.7, 38.2, 32.3. **HRMS (ESI)** *m/z*: [M+H]<sup>+</sup> calcd for C<sub>19</sub>H<sub>18</sub>NOS 308.1104; found 308.1108. **FTIR (cm<sup>-1</sup>)** 3369, 2937, 1672, 1443, 1342, 1222.

### 3-((1*H*-Indol-2-yl)thio)cyclobutyl(*p*-tolyl)methanone (**3c**)

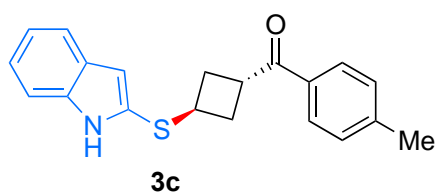

Following the general procedure, treatment of indoline-2-thione **1a** (0.030 g, 0.2 mmol) and bicyclo[1.1.0]butan-1-yl(*p*-tolyl)methanone **2c** (0.041 g, 0.24 mmol) with Sc(OTf)<sub>3</sub> (0.005 g, 0.01 mmol) in CH<sub>2</sub>Cl<sub>2</sub> (4.0 mL) at 25 °C for 12 h followed by flash column chromatography (Pet. ether/ EtOAc = 90/10) of the crude reaction mixture using silica gel afforded 3-((1*H*-indol-2-yl)thio)cyclobutyl(*p*-tolyl)methanone **3c** as purple solid (0.046 g, 71% yield).

**R<sub>f</sub>** (Pet. ether /EtOAc = 90/10): 0.34; **<sup>1</sup>H NMR (400 MHz, CDCl<sub>3</sub>)** δ 8.18 (s, 1H), 7.74 (d, *J* = 8.1 Hz, 2H), 7.60 (d, *J* = 7.9 Hz, 1H), 7.35 (d, *J* = 8.1 Hz, 1H), 7.26 – 7.20 (m, 3H), 7.12 (t, *J* = 7.1 Hz, 1H), 6.71 – 6.71 (m, 1H), 4.02 – 3.95 (m, 1H), 3.81 – 3.74 (m, 1H), 2.80 – 2.73 (m, 2H), 2.44 – 2.34 (m, 2H), 2.40 (s, 3H). **<sup>13</sup>C NMR (100 MHz, CDCl<sub>3</sub>)** δ 199.9, 144.2, 137.3, 132.7, 129.5, 128.7, 128.6, 126.9, 122.9, 120.5, 120.3, 110.8, 110.2, 39.8, 38.1, 32.3, 21.8. **HRMS (ESI)** *m/z*: [M+H]<sup>+</sup> calcd for C<sub>20</sub>H<sub>20</sub>NOS 322.1260; found 322.1270. **FTIR (cm<sup>-1</sup>)** 3351, 2932, 1669, 1447, 1346, 1184.

### 3-((1*H*-Indol-2-yl)thio)cyclobutyl(3-methoxyphenyl)methanone (**3d**)

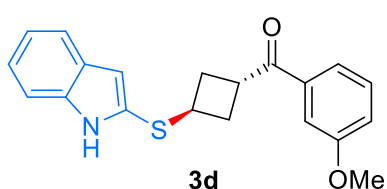

Following the general procedure, treatment of indoline-2-thione **1a** (0.030 g, 0.2 mmol) and bicyclo[1.1.0]butan-1-yl(3-methoxyphenyl)methanone **2d** (0.045 g, 0.24 mmol) with Sc(OTf)<sub>3</sub> (0.005 g, 0.01 mmol) in CH<sub>2</sub>Cl<sub>2</sub> (4.0 mL) at 25 °C for 12 h followed by flash column chromatography (Pet. ether/ EtOAc = 90/10) of the crude reaction mixture using silica gel afforded 3-((1*H*-indol-2-yl)thio)cyclobutyl(3-methoxyphenyl)methanone **3d** as green sticky solid (0.050 g, 74% yield).

**R<sub>f</sub>** (Pet. ether /EtOAc = 90/10): 0.33; **<sup>1</sup>H NMR (400 MHz, CDCl<sub>3</sub>)** δ 8.31 (s, 1H), 7.60 (d, *J* = 7.9 Hz, 1H), 7.42 – 7.32 (m, 4H), 7.22 (t, *J* = 7.6 Hz, 1H), 7.15 – 7.08 (m, 2H), 6.72 – 6.2 (m, 1H), 4.01 – 3.94 (m, 1H), 3.84 (s, 3H), 3.81 – 3.74 (m, 1H), 2.80 – 2.73 (m, 2H), 2.44 – 2.37 (m, 2H). **<sup>13</sup>C NMR (100 MHz, CDCl<sub>3</sub>)** δ 200.2, 159.9, 137.3, 136.6, 129.8, 128.7, 126.8, 122.9, 121.0, 120.4, 120.3, 119.7, 112.7, 110.8, 110.2, 55.5, 39.7, 38.3, 32.3. **HRMS (ESI)** *m/z*: [M+H]<sup>+</sup> calcd for C<sub>20</sub>H<sub>20</sub>NO<sub>2</sub>S 338.1209; found 338.1219. **FTIR (cm<sup>-1</sup>)** 3354, 2936, 1674, 1589, 1441, 1259.

### 3-((1*H*-Indol-2-yl)thio)cyclobutyl)(benzo[*d*][1,3]dioxol-5-yl)methanone (3e)

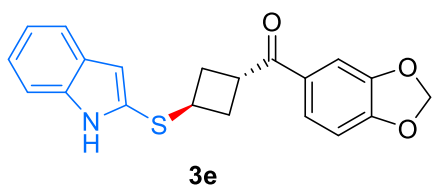

Following the general procedure, treatment of indoline-2-thione **1a** (0.030 g, 0.2 mmol) and benzo[*d*][1,3]dioxol-5-yl(bicyclo[1.1.0]butan-1-yl)methanone **2e** (0.049 g, 0.24 mmol) with Sc(OTf)<sub>3</sub> (0.005 g, 0.01 mmol) in CH<sub>2</sub>Cl<sub>2</sub> (4.0 mL) at 25 °C for 12 h followed by flash column chromatography (Pet. ether/ EtOAc = 90/10) of the crude reaction mixture using silica gel afforded 3-((1*H*-indol-2-yl)thio)cyclobutyl)(benzo[*d*][1,3]dioxol-5-yl)methanone **3e** as greenish sticky solid (0.047 g, 67% yield).

**R<sub>f</sub>** (Pet. ether /EtOAc = 90/10): 0.32; **<sup>1</sup>H NMR (400 MHz, CDCl<sub>3</sub>)** δ 8.19 (s, 1H), 7.59 (d, *J* = 7.6 Hz, 1H), 7.40 – 7.33 (m, 3H), 7.23 – 7.19 (m, 1H), 7.14 – 7.10 (m, 1H), 6.82 (d, *J* = 8.1 Hz, 1H), 6.71-6.70 (m, 1H), 6.03 (s, 2H), 3.95 – 3.88 (m, 1H), 3.80 – 3.73 (m, 1H), 2.78 – 2.71 (m, 2H), 2.41 – 2.34 (m, 2H). **<sup>13</sup>C NMR (100 MHz, CDCl<sub>3</sub>)** δ 198.4, 151.9, 148.4, 137.3, 130.1, 128.7, 126.9, 124.7, 122.9, 120.5, 120.3, 110.8, 110.2, 108.2, 108.1, 102.0, 39.7, 38.1, 32.4. **HRMS (ESI)** *m/z*: [M+H]<sup>+</sup> calcd for C<sub>20</sub>H<sub>18</sub>NO<sub>3</sub>S 352.1002; found 352.1004. **FTIR (cm<sup>-1</sup>)** 3384, 2930, 1665, 1440, 1348, 1250.

### 3-((1*H*-Indol-2-yl)thio)cyclobutyl)(thiophen-2-yl)methanone (3f)

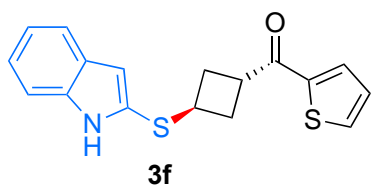

Following the general procedure, treatment of indoline-2-thione **1a** (0.030 g, 0.2 mmol) and bicyclo[1.1.0]butan-1-yl(thiophen-2-yl)methanone **2f** (0.039 g, 0.24 mmol) with Sc(OTf)<sub>3</sub> (0.005 g, 0.01 mmol) in CH<sub>2</sub>Cl<sub>2</sub> (4.0 mL) at 25 °C for 12 h followed by flash column chromatography (Pet. ether/ EtOAc = 90/10) of the crude reaction mixture using silica gel afforded (3-((1*H*-indol-2-yl)thio)cyclobutyl)(thiophen-2-yl)methanone **3f** as purple solid (0.047 g, 75% yield).

**R<sub>f</sub>** (Pet. ether /EtOAc = 90/10): 0.34; **<sup>1</sup>H NMR (400 MHz, CDCl<sub>3</sub>)** δ 8.31 (s, 1H), 7.63 – 7.55 (m, 3H), 7.35 (d, *J* = 8.1 Hz, 1H), 7.22 (t, *J* = 7.3 Hz, 1H), 7.15 – 7.09 (m, 2H), 6.72 – 6.72 (m, 1H), 3.92 – 3.79 (m, 2H), 2.81 – 2.75 (m, 2H), 2.43 – 2.35 (m, 2H). **<sup>13</sup>C NMR (100 MHz, CDCl<sub>3</sub>)** δ 193.8, 142.7, 137.3, 133.9, 132.2, 128.7, 128.3, 126.7, 122.9, 120.4, 120.3, 110.9, 110.3, 39.9, 38.9, 32.5. **HRMS (ESI)** *m/z*: [M+H]<sup>+</sup> calcd for C<sub>17</sub>H<sub>16</sub>NOS<sub>2</sub> 314.0668; found 314.0672. **FTIR (cm<sup>-1</sup>)** 3346, 2148, 1650, 1511, 1415, 1232.

### 1-(3-((1*H*-Indol-2-yl)thio)cyclobutyl)pentan-1-one (**3g**)

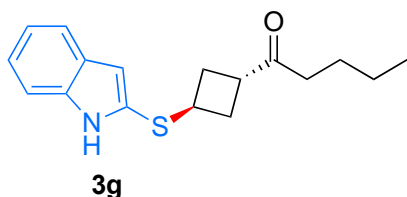

Following the general procedure, treatment of indoline-2-thione **1a** (0.030 g, 0.2 mmol) and 1-(bicyclo[1.1.0]butan-1-yl)pentan-1-one **2g** (0.033 g, 0.24 mmol) with Sc(OTf)<sub>3</sub> (0.005 g, 0.01 mmol) in CH<sub>2</sub>Cl<sub>2</sub> (4.0 mL) at 25 °C for 12 h followed by flash column chromatography (Pet. ether/ EtOAc = 90/10) of the crude reaction mixture using silica gel afforded 1-(3-((1*H*-indol-2-yl)thio)cyclobutyl)pentan-1-one **3g** as yellow liquid (0.053 g, 92% yield).

**R<sub>f</sub>** (Pet. ether /EtOAc = 90/10): 0.34; **<sup>1</sup>H NMR (400 MHz, CDCl<sub>3</sub>)** δ 8.26 (s, 1H), 7.59 (d, *J* = 7.9 Hz, 1H), 7.33 (d, *J* = 8.2 Hz, 1H), 7.21 (t, *J* = 7.6 Hz, 1H), 7.12 (t, *J* = 7.5 Hz, 1H), 6.68 – 6.68 (m, 1H), 3.71 (p, *J* = 7.3 Hz, 1H), 3.29 – 3.23 (m, 1H), 2.61 – 2.55 (m, 2H), 2.35 (t, *J* = 7.4 Hz, 2H), 2.26 – 2.19 (m, 2H), 1.54 (p, *J* = 7.4 Hz, 2H), 1.28 (q, *J* = 7.4 Hz, 2H), 0.89 (t, *J* = 7.3 Hz, 3H). **<sup>13</sup>C NMR (100 MHz, CDCl<sub>3</sub>)** δ 211.8, 137.3, 128.6, 126.9, 122.9, 120.4, 120.2, 110.8, 110.1, 41.4, 40.6, 39.6, 31.6, 25.9, 22.5, 14.0. **HRMS (ESI)** *m/z*: [M+H]<sup>+</sup> calcd for C<sub>17</sub>H<sub>22</sub>NOS 288.1417; found 288.1423. **FTIR (cm<sup>-1</sup>)** 3350, 2945, 2065, 1699, 1444, 1343.

### Benzyl-3-((1*H*-indol-2-yl)thio)cyclobutane-1-carboxylate (**3h**)

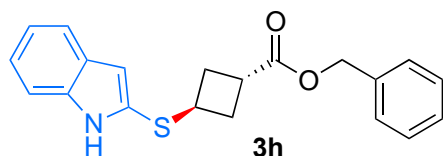

Following the general procedure, treatment of indoline-2-thione **1a** (0.030 g, 0.2 mmol) and benzyl bicyclo[1.1.0]butane-1-carboxylate **2h** (0.045 g, 0.24 mmol) with Sc(OTf)<sub>3</sub> (0.005 g, 0.01 mmol) in CH<sub>2</sub>Cl<sub>2</sub> (4.0 mL) at 25 °C for 12 h followed by flash column chromatography (Pet. ether/ EtOAc = 90/10) of the crude reaction mixture using silica gel afforded benzyl-3-((1*H*-indol-2-yl)thio)cyclobutane-1-carboxylate **3h** as yellow liquid (0.055 g, 82% yield).

**R<sub>f</sub>** (Pet. ether /EtOAc = 90/10): 0.33; **<sup>1</sup>H NMR (400 MHz, CDCl<sub>3</sub>)** δ 8.16 (s, 1H), 7.59 (d, *J* = 7.9 Hz, 1H), 7.73 – 7.32 (m, 6H), 7.24 – 7.20 (m, 1H), 7.13 (t, *J* = 7.5 Hz, 1H), 6.71 – 6.65 (m, 1H), 5.14 (s, 2H), 3.86 (p, *J* = 7.4 Hz, 1H), 3.22 – 3.15 (m, 1H), 2.69 – 2.63 (m, 2H), 2.36 – 2.29 (m, 2H). **<sup>13</sup>C NMR (100 MHz, CDCl<sub>3</sub>)** δ 175.1, 137.3, 135.9, 128.7, 128.7, 128.4, 128.3, 126.7, 122.9, 120.5, 120.3, 110.8, 110.3, 66.6, 40.2, 34.8, 32.7. **HRMS (ESI)** *m/z*: [M+H]<sup>+</sup> calcd for C<sub>22</sub>H<sub>20</sub>NO<sub>2</sub>S 338.1209; found 338.1219. **FTIR (cm<sup>-1</sup>)** 3385, 2947, 1721, 1445, 1254, 1177.

### Cinnamyl-3-((1*H*-indol-2-yl)thio)cyclobutane-1-carboxylate (**3i**)

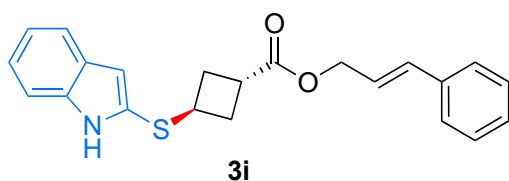

Following the general procedure, treatment of indoline-2-thione **1a** (0.030 g, 0.2 mmol) and cinnamyl bicyclo[1.1.0]butane-1-carboxylate **2i** (0.051 g, 0.24 mmol) with Sc(OTf)<sub>3</sub> (0.005 g, 0.01

mmol) in CH<sub>2</sub>Cl<sub>2</sub> (4.0 mL) at 25 °C for 12 h followed by flash column chromatography (Pet. ether/ EtOAc = 90/10) of the crude reaction mixture using silica gel afforded cinnamyl-3-((1*H*-indol-2-yl)thio)cyclobutane-1-carboxylate **3i** as yellow liquid (0.049 g, 68% yield).

**R<sub>f</sub>** (Pet. ether /EtOAc = 90/10): 0.33; **<sup>1</sup>H NMR (400 MHz, CDCl<sub>3</sub>)** δ 8.13 (s, 1H), 7.59 (d, *J* = 7.9 Hz, 1H), 7.39 – 7.25 (m, 6H), 7.22 (t, *J* = 7.6 Hz, 1H), 7.12 (t, *J* = 7.5 Hz, 1H), 6.69 – 6.62 (m, 2H), 6.27 (dt, *J* = 15.9, 6.5 Hz, 1H), 4.75 (d, *J* = 6.5 Hz, 2H), 3.87 (p, *J* = 7.4 Hz, 1H), 3.21 – 3.13 (m, 1H), 2.70 – 2.64 (m, 2H), 2.37 – 2.30 (m, 2H). **<sup>13</sup>C NMR (100 MHz, CDCl<sub>3</sub>)** δ 175.1, 137.3, 136.2, 134.5, 128.8, 128.7, 128.3, 126.8, 126.7, 123.1, 123.0, 120.5, 120.3, 110.8, 110.4, 65.5, 40.3, 34.9, 32.8. **HRMS (ESI)** *m/z*: [M+H]<sup>+</sup> calcd for C<sub>22</sub>H<sub>22</sub>NO<sub>2</sub>S 364.1366; found 364.1371. **FTIR (cm<sup>-1</sup>)** 3377, 1720, 1443, 1340, 1250, 1179.

### Cyclohexyl-3-((1*H*-indol-2-yl)thio)cyclobutane-1-carboxylate (**3j**)

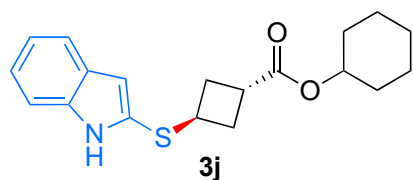

Following the general procedure, treatment of indoline-2-thione **1a** (0.030 g, 0.2 mmol) and cyclohexyl bicyclo[1.1.0]butane-1-carboxylate **2j** (0.043 g, 0.24 mmol) with Sc(OTf)<sub>3</sub> (0.005 g, 0.01 mmol) in CH<sub>2</sub>Cl<sub>2</sub> (4.0 mL) at

25 °C for 12 h followed by flash column chromatography (Pet. ether/ EtOAc = 90/10) of the crude reaction mixture using silica gel afforded cyclohexyl-3-((1*H*-indol-2-yl)thio)cyclobutane-1-carboxylate **3j** as yellow liquid (0.058 g, 88% yield).

**R<sub>f</sub>** (Pet. ether /EtOAc = 90/10): 0.33; **<sup>1</sup>H NMR (400 MHz, CDCl<sub>3</sub>)** δ 8.18 (s, 1H), 7.58 (d, *J* = 7.9 Hz, 1H), 7.33 (d, *J* = 8.4 Hz, 1H), 7.21 (t, *J* = 7.7 Hz, 1H), 7.12 (t, *J* = 7.3 Hz, 1H), 6.67 (s, 1H), 4.77 – 4.75 (m, 1H), 3.85 (p, *J* = 7.4 Hz, 1H), 3.14 – 3.06 (m, 1H), 2.62 (dt, *J* = 13.4, 7.6 Hz, 2H), 2.34 – 2.27 (m, 2H), 1.80 – 1.70 (m, 7H), 1.43 – 1.34 (m, 5H). **<sup>13</sup>C NMR (100 MHz, CDCl<sub>3</sub>)** δ 174.8, 137.3, 128.7, 126.9, 122.9, 120.5, 120.3, 110.8, 110.2, 72.9, 40.3, 35.1, 32.8, 31.7, 25.5, 23.8, 16.2. **HRMS (ESI)** *m/z*: [M+H]<sup>+</sup> calcd for C<sub>19</sub>H<sub>24</sub>NO<sub>2</sub>S 330.1522; found 330.1532. **FTIR (cm<sup>-1</sup>)** 3355, 2072, 1707, 1445, 1343, 1132.

**(1*R*,2*S*,4*S*)-2-Isopropyl-4-methylcyclohexyl 3-((1*H*-indol-2-yl)thio)cyclobutane-1-carboxylate (3k)**

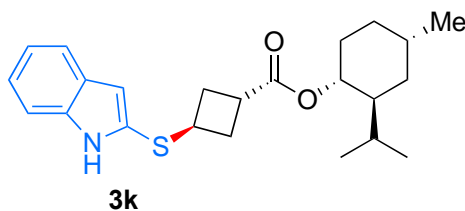

Following the general procedure, treatment of indoline-2-thione **1a** (0.030 g, 0.2 mmol) and (1*R*,2*S*,4*S*)-2-isopropyl-4-methylcyclohexyl bicyclo[1.1.0]butane-1-carboxylate **2k** (0.057 g, 0.24 mmol) with Sc(OTf)<sub>3</sub> (0.005 g, 0.01 mmol) in CH<sub>2</sub>Cl<sub>2</sub> (4.0 mL) at 25 °C for 12 h followed by flash column chromatography (Pet. ether/ EtOAc = 90/10) of the crude reaction mixture using silica gel afforded (1*R*,2*S*,4*S*)-2-isopropyl-4-methylcyclohexyl 3-((1*H*-indol-2-yl)thio)cyclobutane-1-carboxylate **3k** as yellow liquid (0.062 g, 80% yield with 12:1 dr).

**R<sub>f</sub>** (Pet. ether /EtOAc = 90/10): 0.33; **<sup>1</sup>H NMR (400 MHz, CDCl<sub>3</sub>)** δ 8.23 (s, 1H), 7.59 (d, *J* = 7.9 Hz, 1H), 7.33 (d, *J* = 8.2 Hz, 1H), 7.21 (t, *J* = 7.6 Hz, 1H), 7.13 (t, *J* = 7.5 Hz, 1H), 6.68 – 6.68 (m, 1H), 4.69 (td, *J* = 10.8, 4.3 Hz, 1H), 3.85 (p, *J* = 7.4 Hz, 1H), 3.15 – 3.08 (m, 1H), 2.66 – 2.60 (m, 2H), 2.36 – 2.27 (m, 2H), 1.97 (d, *J* = 11.8 Hz, 1H), 1.83 (dtd, *J* = 13.9, 7.0, 2.6 Hz, 1H), 1.71 – 1.65 (m, 3H), 1.41 – 1.27 (m, 2H), 1.11 – 0.99 (m, 2H), 0.91 – 0.88 (m, 6H), 0.75 (d, *J* = 7.0 Hz, 3H). **<sup>13</sup>C NMR (100 MHz, CDCl<sub>3</sub>)** δ 174.9, 137.3, 128.7, 126.8, 122.9, 120.4, 120.3, 110.8, 110.2, 74.5, 47.1, 40.9, 40.2, 35.1, 34.3, 32.7, 31.5, 26.4, 23.5, 22.1, 20.9, 16.4. **HRMS (ESI) m/z:** [M+H]<sup>+</sup> calcd for C<sub>23</sub>H<sub>32</sub>NO<sub>2</sub>S 386.2148; found 386.2151. **FTIR (cm<sup>-1</sup>)** 3353, 2943, 1710, 1448, 1344, 1191.

**(*E*)-3,7-Dimethylocta-2,6-dien-1-yl-3-((1*H*-indol-2-yl)thio)cyclobutane-1-carboxylate (3l)**

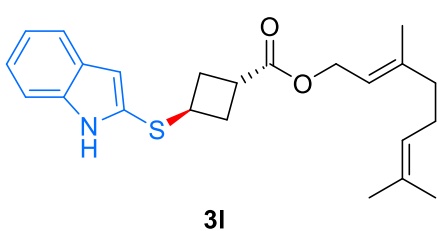

Following the general procedure, treatment of indoline-2-thione **1a** (0.030 g, 0.2 mmol) and (*E*)-3,7-dimethylocta-2,6-dien-1-yl bicyclo[1.1.0]butane-1-carboxylate **2l** (0.056 g, 0.24 mmol) with Sc(OTf)<sub>3</sub> (0.005 g, 0.01 mmol) in CH<sub>2</sub>Cl<sub>2</sub> (4.0 mL) at 25 °C for 12 h followed by flash column chromatography (Pet. ether/ EtOAc = 90/10) of the crude reaction mixture using silica gel afforded (*E*)-3,7-dimethylocta-2,6-dien-1-yl-3-((1*H*-indol-2-yl)thio)cyclobutane-1-carboxylate **3l** as greenish liquid (0.042 g, 55% yield).

**R<sub>f</sub>** (Pet. ether /EtOAc = 90/10): 0.33; **<sup>1</sup>H NMR (400 MHz, CDCl<sub>3</sub>)** δ 8.10 (s, 1H), 7.58 (d, *J* = 7.9 Hz, 1H), 7.33 (d, *J* = 8.1 Hz, 1H), 7.21 (t, *J* = 7.6 Hz, 1H), 7.11 (t, *J* = 7.4 Hz, 1H), 6.67 – 6.67 (m, 1H), 5.33 – 5.29 (m, 1H), 5.08 – 5.05 (m, 1H), 4.60 (d, *J* = 7.1 Hz, 2H), 3.89 – 3.81 (m, 1H), 3.15 – 3.08 (m, 1H), 2.67 – 2.60 (m, 2H), 2.34 – 2.27 (m, 2H), 2.10 – 2.01 (m, 4H),

1.68 (d,  $J = 6.6$  Hz, 6H), 1.59 (s, 3H).  $^{13}\text{C}$  NMR (100 MHz,  $\text{CDCl}_3$ )  $\delta$  175.3, 142.6, 137.3, 132.0, 128.7, 126.8, 123.8, 122.9, 120.5, 120.3, 118.2, 110.8, 110.3, 61.8, 40.3, 39.6, 34.9, 32.8, 26.4, 25.8, 17.8, 16.6. HRMS (ESI)  $m/z$ :  $[\text{M}+\text{Na}]^+$  calcd for  $\text{C}_{23}\text{H}_{29}\text{NO}_2\text{SNa}$  406.1811; found 406.1814. FTIR ( $\text{cm}^{-1}$ ) 3375, 2927, 1717, 1444, 1343, 1182.

### Methyl 3-((1*H*-indol-2-yl)thio)-3-phenylcyclobutane-1-carboxylate (**3m**)

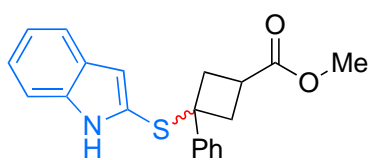

**3m**

Following the general procedure, treatment of indoline-2-thione **1a** (0.030 g, 0.2 mmol) and methyl 3-phenylbicyclo[1.1.0]butane-1-carboxylate **2m** (0.045 g, 0.24 mmol) with  $\text{Sc}(\text{OTf})_3$  (0.005 g, 0.01 mmol) in  $\text{CH}_2\text{Cl}_2$  (4.0 mL) at 25 °C for 12 h followed by flash column chromatography (Pet. ether/ EtOAc = 90/10) of the crude reaction mixture using silica gel afforded methyl 3-((1*H*-indol-2-yl)thio)-3-phenylcyclobutane-1-carboxylate **3m** as yellow liquid (0.059 g, 88% yield with 2:1 dr).

$R_f$  (Pet. ether /EtOAc = 90/10): 0.34;  $^1\text{H}$  NMR (400 MHz,  $\text{CDCl}_3$ ) of major isomer  $\delta$  7.60 – 7.58 (m, 1H), 7.43 (s, 1H), 7.32 – 7.22 (m, 4H), 7.20 – 7.09 (m, 3H), 6.95 – 6.93 (m, 1H), 6.69 – 6.68 (m, 1H), 3.68 (s, 3H), 3.67 – 3.60 (m, 1H), 3.05 – 2.90 (m, 2H), 2.87 – 2.79 (m, 2H).

Representative peaks of minor isomer  $^1\text{H}$  NMR (400 MHz,  $\text{CDCl}_3$ ) 7.92 (s, 1H), 7.60 – 7.60 (m, 1H).  $^{13}\text{C}$  NMR (100 MHz,  $\text{CDCl}_3$ ) of major isomer  $\delta$  174.9, 147.3, 137.3, 128.3, 128.1, 126.9, 126.2, 125.5, 123.2, 120.8, 120.1, 112.5, 110.8, 53.6, 52.0, 37.2, 32.9. Representative peaks of minor isomer  $^{13}\text{C}$  NMR (100 MHz,  $\text{CDCl}_3$ )  $\delta$  175.4, 145.5, 112.5, 111.0, 54.2, 52.3, 37.8, 32.9. HRMS (ESI)  $m/z$ :  $[\text{M}+\text{Na}]^+$  calcd for  $\text{C}_{20}\text{H}_{19}\text{NNaO}_2\text{S}$  360.1029; found 360.1056. FTIR ( $\text{cm}^{-1}$ ) 3379, 1725, 1497, 1439, 1344, 1217.

### (3-((1-Methyl-1*H*-indol-2-yl)thio)cyclobutyl)(naphthalen-2-yl)methanone (**3n**)

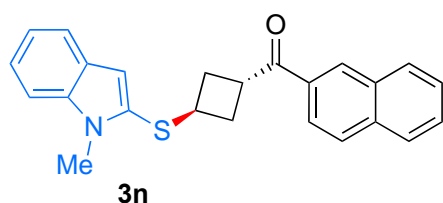

**3n**

Following the general procedure, treatment of 1-methylindoline-2-thione **1b** (0.033 g, 0.2 mmol) and bicyclo[1.1.0]butan-1-yl(naphthalen-2-yl)methanone **2a** (0.050 g, 0.24 mmol) with  $\text{Sc}(\text{OTf})_3$  (0.005 g, 0.01 mmol) in  $\text{CH}_2\text{Cl}_2$  (4.0 mL) at 25 °C for 12 h followed by flash column chromatography (Pet. ether/ EtOAc = 92/08) of the crude reaction mixture using silica gel afforded (3-((1-methyl-1*H*-indol-2-yl)thio)cyclobutyl)(naphthalen-2-yl)methanone **3n** as white solid (0.044 g, 59% yield).

$R_f$  (Pet. ether /EtOAc = 90/10): 0.37;  $^1\text{H}$  NMR (400 MHz,  $\text{CDCl}_3$ )  $\delta$  8.31 (s, 1H), 7.97 – 7.86 (m, 4H), 7.63 – 7.53 (m, 3H), 7.34 – 7.25 (m, 2H), 7.16 – 7.12 (m, 1H), 6.78 (s, 1H), 4.23 –



4.15 (m, 1H), 3.83 (s, 3H), 3.81 – 3.75 (m, 1H), 2.85 – 2.78 (m, 2H), 2.49 – 2.41 (m, 2H). <sup>13</sup>C NMR (100 MHz, CDCl<sub>3</sub>) δ 200.2, 138.5, 135.7, 132.6, 132.6, 130.1, 129.7, 129.7, 128.7, 128.7, 127.9, 127.5, 126.9, 124.1, 122.5, 120.5, 120.0, 109.8, 109.6, 39.6, 38.5, 32.0, 30.2. HRMS (ESI) m/z: [M+H]<sup>+</sup> calcd for C<sub>24</sub>H<sub>22</sub>NOS 372.1417; found 372.1420. FTIR (cm<sup>-1</sup>) 2926, 1675, 1498, 1444, 1360, 1183.

### Naphthalen-2-yl(3-((1-phenyl-1*H*-indol-2-yl)thio)cyclobutyl)methanone (**3o**)

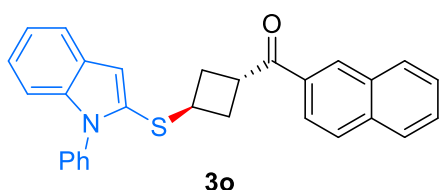

Following the general procedure, treatment of 1-phenylindoline-2-thione **1c** (0.046 g, 0.2 mmol) and bicyclo[1.1.0]butan-1-yl(naphthalen-2-yl)methanone **2a** (0.050 g, 0.24 mmol) with Sc(OTf)<sub>3</sub> (0.005 g, 0.01 mmol) in CH<sub>2</sub>Cl<sub>2</sub> (4.0 mL) at 25 °C for 12 h followed by flash column chromatography (Pet. ether/EtOAc = 90/10) of the crude reaction mixture using silica gel afforded naphthalen-2-yl(3-((1-phenyl-1*H*-indol-2-yl)thio)cyclobutyl)methanone **3o** as yellowish sticky liquid (0.056 g, 65% yield).

R<sub>f</sub> (Pet. ether /EtOAc = 90/10): 0.36; <sup>1</sup>H NMR (400 MHz, CDCl<sub>3</sub>) δ 8.30 (s, 1H), 7.95 – 7.86 (m, 4H), 7.62 – 7.44 (m, 8H), 7.17 – 7.17 (m, 3H), 6.79 (s, 1H), 4.26 – 4.18 (m, 1H), 3.66 – 3.61 (m, 1H), 2.80 – 2.74 (m, 2H), 2.37 – 2.31 (m, 2H). <sup>13</sup>C NMR (100 MHz, CDCl<sub>3</sub>) δ 200.1, 139.2, 137.5, 135.7, 132.6, 132.6, 131.8, 130.1, 129.7, 129.4, 128.7, 128.7, 128.6, 128.2, 127.9, 126.9, 124.1, 122.7, 120.7, 120.1, 110.5, 108.6, 38.9, 38.7, 32.0. HRMS (ESI) m/z: [M+H]<sup>+</sup> calcd for C<sub>29</sub>H<sub>24</sub>NOS 434.1573; found 434.1582. FTIR (cm<sup>-1</sup>) 2928, 1675, 1498, 1446, 1361, 1183.

### (3-((3-Methyl-1*H*-indol-2-yl)thio)cyclobutyl)(naphthalen-2-yl)methanone (**3p**)

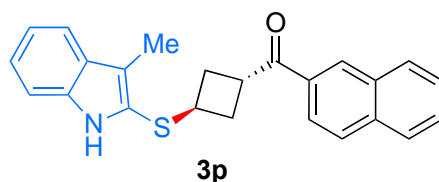

Following the general procedure, treatment of 3-methylindoline-2-thione **1d** (0.033 g, 0.2 mmol) and bicyclo[1.1.0]butan-1-yl(naphthalen-2-yl)methanone **2a** (0.050 g, 0.24 mmol) with Sc(OTf)<sub>3</sub> (0.005 g, 0.01 mmol) in CH<sub>2</sub>Cl<sub>2</sub> (4.0 mL) at 25 °C for 12 h followed by flash column chromatography (Pet. ether/EtOAc = 92/08) of the crude reaction mixture using silica gel afforded (3-((3-methyl-1*H*-indol-2-yl)thio)cyclobutyl)(naphthalen-2-yl)methanone **3p** as yellow liquid (0.055 g, 74% yield).

R<sub>f</sub> (Pet. ether /EtOAc = 90/10): 0.37; <sup>1</sup>H NMR (400 MHz, CDCl<sub>3</sub>) δ 8.30 (s, 1H), 8.14 (s, 1H), 8.02 – 7.85 (m, 4H), 7.62 – 7.53 (m, 3H), 7.35 (d, *J* = 8.1 Hz, 1H), 7.28 – 7.25 (m, 1H), 7.17

(t,  $J = 7.4$  Hz, 1H), 4.16 – 4.09 (m, 1H), 3.78 (p,  $J = 7.4$  Hz, 1H), 2.81 – 2.75 (m, 2H), 2.48 (s, 3H), 2.46 – 2.40 (m, 2H).  $^{13}\text{C}$  NMR (100 MHz,  $\text{CDCl}_3$ )  $\delta$  200.3, 136.6, 135.7, 132.6, 130.1, 129.6, 128.7, 128.7, 128.6, 127.9, 126.9, 124.1, 123.3, 123.2, 119.6, 119.4, 119.2, 110.8, 40.6, 38.4, 32.6, 10.0. HRMS (ESI)  $m/z$ :  $[\text{M}+\text{H}]^+$  calcd for  $\text{C}_{24}\text{H}_{22}\text{NOS}$  372.1417; found 372.1420. FTIR ( $\text{cm}^{-1}$ ) 3362, 2931, 1670, 1450, 1349, 1242.

### (3-((3-Benzyl-1*H*-indol-2-yl)thio)cyclobutyl)(naphthalen-2-yl)methanone (3q)

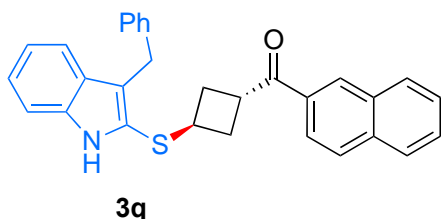

Following the general procedure, treatment of 3-benzylindoline-2-thione **1e** (0.048 g, 0.2 mmol) and bicyclo[1.1.0]butan-1-yl(naphthalen-2-yl)methanone **2a** (0.050 g, 0.24 mmol) with  $\text{Sc}(\text{OTf})_3$  (0.005 g, 0.01 mmol) in  $\text{CH}_2\text{Cl}_2$  (4.0 mL) at 25 °C for 12 h followed by flash column chromatography (Pet. ether/ EtOAc = 92/08) of the crude reaction mixture using silica gel afforded (3-((3-benzyl-1*H*-indol-2-yl)thio)cyclobutyl)(naphthalen-2-yl)methanone **3q** as yellow liquid (0.080 g, 89% yield).

$R_f$  (Pet. ether /EtOAc = 90/10): 0.37;  $^1\text{H}$  NMR (400 MHz,  $\text{CDCl}_3$ )  $\delta$  8.27 (s, 1H), 8.26 (s, 1H), 7.94 – 7.87 (m, 4H), 7.63 – 7.54 (m, 2H), 7.47 (d,  $J = 8.1$  Hz, 1H), 7.36 (d,  $J = 8.2$  Hz, 1H), 7.33 – 7.16 (m, 6H), 7.09 (t,  $J = 7.5$  Hz, 1H), 4.35 (s, 2H), 4.19 – 4.09 (m, 1H), 3.81 – 3.74 (m, 1H), 2.79 – 2.72 (m, 2H), 2.44 – 2.37 (m, 2H).  $^{13}\text{C}$  NMR (100 MHz,  $\text{CDCl}_3$ )  $\delta$  200.3, 141.3, 136.9, 135.7, 132.6, 132.5, 130.1, 129.7, 128.7, 128.5, 128.5, 128.4, 128.1, 127.9, 126.9, 126.0, 124.6, 124.1, 123.3, 121.7, 119.9, 119.9, 110.9, 40.4, 38.4, 32.6, 31.2. HRMS (ESI)  $m/z$ :  $[\text{M}+\text{Na}]^+$  calcd for  $\text{C}_{30}\text{H}_{25}\text{NNaOS}$  470.1549; found 470.1558. FTIR ( $\text{cm}^{-1}$ ) 3394, 1670, 1443, 1348, 1257, 1130.

### (3-((4-Chloro-1*H*-indol-2-yl)thio)cyclobutyl)(naphthalen-2-yl)methanone (3r)

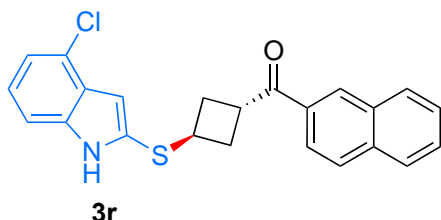

Following the general procedure, treatment of 4-chloroindoline-2-thione **1f** (0.037 g, 0.2 mmol) and bicyclo[1.1.0]butan-1-yl(naphthalen-2-yl)methanone **2a** (0.050 g, 0.24 mmol) with  $\text{Sc}(\text{OTf})_3$  (0.005 g, 0.01 mmol) in  $\text{CH}_2\text{Cl}_2$  (4.0 mL) at 25 °C for 12 h followed by flash column chromatography (Pet. ether/ EtOAc = 90/10) of the crude reaction mixture using silica gel afforded (3-((4-chloro-1*H*-indol-2-yl)thio)cyclobutyl)(naphthalen-2-yl)methanone **3r** as yellow solid (0.069 g, 88% yield).

**R<sub>f</sub>** (Pet. ether /EtOAc = 90/10): 0.34; **<sup>1</sup>H NMR (400 MHz, CDCl<sub>3</sub>)** δ 8.39 (s, 1H), 8.31 (s, 1H), 7.97 – 7.85 (m, 4H), 7.62 – 7.53 (m, 2H), 7.26 – 7.23 (m, 1H), 7.14 – 7.10 (m, 2H), 6.81 (d, *J* = 2.1 Hz, 1H), 4.23 – 4.15 (m, 1H), 3.86 (p, *J* = 7.3 Hz, 1H), 2.89 – 2.83 (m, 2H), 2.52 – 2.45 (m, 2H). **<sup>13</sup>C NMR (100 MHz, CDCl<sub>3</sub>)** δ 200.2, 137.8, 135.8, 132.6, 132.5, 130.2, 129.7, 128.7, 128.7, 128.3, 127.9, 127.7, 127.0, 125.6, 124.1, 123.4, 120.1, 109.4, 108.1, 39.7, 38.3, 32.5. **HRMS (ESI)** *m/z*: [M+H]<sup>+</sup> calcd for C<sub>23</sub>H<sub>19</sub>ClNOS 392.0870; found 392.0873. **FTIR (cm<sup>-1</sup>)** 3327, 2938, 1667, 1476, 1422, 1183.

### (3-((5-Chloro-1*H*-indol-2-yl)thio)cyclobutyl)(naphthalen-2-yl)methanone (3s)

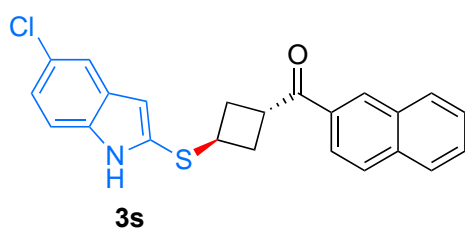

Following the general procedure, treatment of 5-chloroindoline-2-thione **1g** (0.037 g, 0.2 mmol) and bicyclo[1.1.0]butan-1-yl(naphthalen-2-yl)methanone **2a** (0.050 g, 0.24 mmol) with Sc(OTf)<sub>3</sub> (0.005 g, 0.01 mmol) in CH<sub>2</sub>Cl<sub>2</sub> (4.0 mL) at 25 °C for 12 h followed by flash column chromatography (Pet. ether/ EtOAc = 90/10) of the crude reaction mixture using silica gel afforded (3-((5-chloro-1*H*-indol-2-yl)thio)cyclobutyl)(naphthalen-2-yl)methanone **3s** as yellow solid (0.051 g, 65% yield).

**R<sub>f</sub>** (Pet. ether /EtOAc = 90/10): 0.34; **<sup>1</sup>H NMR (400 MHz, CDCl<sub>3</sub>)** δ 8.30 (s, 1H), 8.22 (s, 1H), 7.96 – 7.86 (m, 4H), 7.62 – 7.53 (m, 3H), 7.26 (t, *J* = 4.3 Hz, 1H), 7.16 (dd, *J* = 8.7, 2.0 Hz, 1H), 6.64 (d, *J* = 1.3 Hz, 1H), 4.22 – 4.15 (m, 1H), 3.89 – 3.81 (m, 1H), 2.88 – 2.82 (m, 2H), 2.51 – 2.43 (m, 2H). **<sup>13</sup>C NMR (100 MHz, CDCl<sub>3</sub>)** δ 200.2, 135.8, 135.6, 132.6, 132.5, 130.1, 129.7, 129.7, 128.9, 128.7, 128.7, 127.9, 127.0, 126.1, 124.1, 123.2, 119.8, 111.8, 109.3, 39.7, 38.3, 32.5. **HRMS (ESI)** *m/z*: [M+H]<sup>+</sup> calcd for C<sub>23</sub>H<sub>19</sub>ClNOS 392.0870; found 392.0875. **FTIR (cm<sup>-1</sup>)** 3346, 2941, 1670, 1624, 1448, 1184.

### 3-((5-Bromo-1*H*-indol-2-yl)thio)cyclobutyl)(naphthalen-2-yl)methanone (3t)

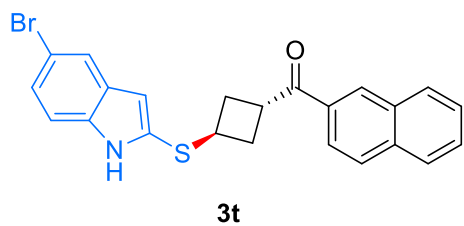

Following the general procedure, treatment of 5-bromoindoline-2-thione **1h** (0.046 g, 0.2 mmol) and bicyclo[1.1.0]butan-1-yl(naphthalen-2-yl)methanone **2a** (0.050 g, 0.24 mmol) with Sc(OTf)<sub>3</sub> (0.005 g, 0.01 mmol) in CH<sub>2</sub>Cl<sub>2</sub> (4.0 mL) at 25 °C for 12 h followed by flash column chromatography (Pet. ether/ EtOAc = 90/10) of the crude reaction mixture using

silica gel afforded 3-((5-bromo-1*H*-indol-2-yl)thio)cyclobutyl)(naphthalen-2-yl)methanone **3t** as brown sticky solid (0.060 g, 69% yield).

**R<sub>f</sub>** (Pet. ether /EtOAc = 90/10): 0.35; **<sup>1</sup>H NMR (400 MHz, CDCl<sub>3</sub>)** δ 8.30 – 8.27 (m, 2H), 7.96 – 7.92 (m, 2H), 7.89 – 7.85 (m, 2H), 7.72 (s, 1H), 7.62 – 7.55 (m, 2H), 7.30 – 7.28 (m, 1H), 7.22 (d, *J* = 8.6 Hz, 1H), 6.64 – 6.63 (m, 1H), 4.22 – 4.14 (m, 1H), 3.88 – 3.81 (m, 1H), 2.88 – 2.81 (m, 2H), 2.50 – 2.43 (m, 2H). **<sup>13</sup>C NMR (100 MHz, CDCl<sub>3</sub>)** δ 200.2, 135.8, 135.8, 132.6, 132.5, 130.4, 130.2, 129.7, 128.82, 128.75, 128.7, 127.9, 127.0, 125.7, 124.1, 122.8, 113.6, 112.2, 109.1, 39.7, 38.3, 32.5. **HRMS (ESI)** *m/z*: [M+H]<sup>+</sup> calcd for C<sub>23</sub>H<sub>19</sub>BrNOS 436.0365; found 436.0377. **FTIR (cm<sup>-1</sup>)** 3328, 2936, 1667, 1438, 1338, 1220.

### 3-((5-Methoxy-1*H*-indol-2-yl)thio)cyclobutyl)(naphthalen-2-yl)methanone (**3u**)

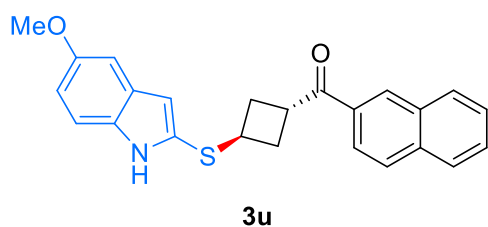

Following the general procedure, treatment of 5-methoxyindoline-2-thione **1i** (0.036 g, 0.2 mmol) and bicyclo[1.1.0]butan-1-yl(naphthalen-2-yl)methanone **2a** (0.050 g, 0.24 mmol) with Sc(OTf)<sub>3</sub> (0.005 g, 0.01 mmol) in CH<sub>2</sub>Cl<sub>2</sub> (4.0 mL) at 25 °C for 12 h followed

by flash column chromatography (Pet. ether/ EtOAc = 90/10) of the crude reaction mixture using silica gel afforded 3-((5-methoxy-1*H*-indol-2-yl)thio)cyclobutyl)(naphthalen-2-yl)methanone **3u** as yellow greenish solid (0.059 g, 76% yield).

**R<sub>f</sub>** (Pet. ether /EtOAc = 90/10): 0.33; **<sup>1</sup>H NMR (400 MHz, CDCl<sub>3</sub>)** δ 8.30 (s, 2H), 7.96 – 7.91 (m, 2H), 7.88 – 7.85 (m, 2H), 7.61 – 7.52 (m, 2H), 7.25 (d, *J* = 9.1 Hz, 1H), 7.07 (d, *J* = 2.2 Hz, 1H), 6.91 (dd, *J*<sub>1</sub> = 8.8 Hz, *J*<sub>2</sub> = 2.4 Hz, 1H), 6.68 – 6.67 (m, 1H), 4.17 – 4.10 (m, 1H), 3.86 (s, 1H), 3.83 – 3.77 (m, 1H), 2.86 – 2.79 (m, 2H), 2.51 – 2.43 (m, 2H). **<sup>13</sup>C NMR (100 MHz, CDCl<sub>3</sub>)** δ 200.4, 154.4, 135.7, 132.6, 132.5, 130.1, 129.6, 129.1, 128.7, 128.7, 127.9, 127.2, 126.9, 124.1, 113.4, 111.7, 110.0, 101.7, 55.9, 39.8, 38.2, 32.4. **HRMS (ESI)** *m/z*: [M+H]<sup>+</sup> calcd for C<sub>24</sub>H<sub>22</sub>NO<sub>2</sub>S 388.1366; found 388.1374. **FTIR (cm<sup>-1</sup>)** 3343, 2939, 1669, 1445, 1348, 1218.

### (3-((6-Bromo-1*H*-indol-2-yl)thio)cyclobutyl)(naphthalen-2-yl)methanone (**3v**)

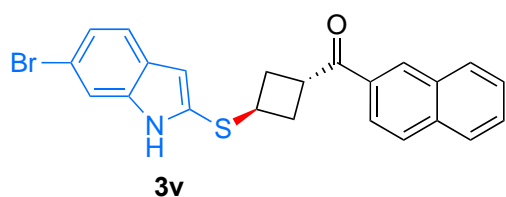

Following the general procedure, treatment of 6-bromoindoline-2-thione **1j** (0.046 g, 0.2 mmol) and bicyclo[1.1.0]butan-1-yl(naphthalen-2-yl)methanone **2a** (0.050 g, 0.24 mmol) with Sc(OTf)<sub>3</sub> (0.005 g,

0.01 mmol) in CH<sub>2</sub>Cl<sub>2</sub> (4.0 mL) at 25 °C for 12 h followed by flash column chromatography (Pet. ether/ EtOAc = 90/10) of the crude reaction mixture using silica gel afforded 3-((6-bromo-1*H*-indol-2-yl)thio)cyclobutyl)(naphthalen-2-yl)methanone **3v** as yellow solid (0.078 g, 89% yield).

**R<sub>f</sub>** (Pet. ether /EtOAc = 90/10): 0.34; **<sup>1</sup>H NMR (400 MHz, CDCl<sub>3</sub>)** δ 8.30 – 8.26 (m, 2H), 7.96 – 7.85 (m, 4H), 7.62 – 7.43 (m, 4H), 7.26 – 7.21 (m, 1H), 6.68 (dd, *J* = 2.1, 0.9 Hz, 1H), 4.21 – 4.13 (m, 1H), 3.87 – 3.80 (m, 1H), 2.87 – 2.81 (m, 2H), 2.50 – 2.43 (m, 2H). **<sup>13</sup>C NMR (100 MHz, CDCl<sub>3</sub>)** δ 200.3, 137.9, 135.7, 132.6, 132.5, 130.2, 129.7, 128.7, 128.0, 127.9, 127.5, 127.0, 124.1, 123.7, 121.6, 116.5, 113.7, 110.0, 39.7, 38.3, 32.4. **HRMS (ESI)** *m/z*: [M+H]<sup>+</sup> calcd for C<sub>23</sub>H<sub>19</sub>BrNOS 436.0365; found 436.0379. **FTIR (cm<sup>-1</sup>)** 3331, 2852, 1668, 1442, 1258, 1185.

### 3-((6-Methoxy-1*H*-indol-2-yl)thio)cyclobutyl)(naphthalen-2-yl)methanone (**3w**)

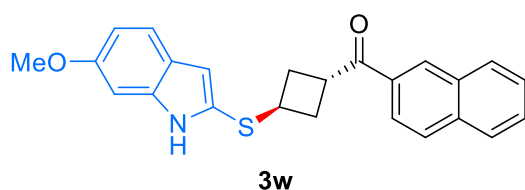

Following the general procedure, treatment of 6-methoxyindoline-2-thione **1k** (0.036 g, 0.2 mmol) and bicyclo[1.1.0]butan-1-yl(naphthalen-2-yl)methanone **2a** (0.050 g, 0.24 mmol) with

Sc(OTf)<sub>3</sub> (0.005 g, 0.01 mmol) in CH<sub>2</sub>Cl<sub>2</sub> (4.0 mL) at 25 °C for 12 h followed by flash column chromatography (Pet. ether/ EtOAc = 90/10) of the crude reaction mixture using silica gel afforded 3-((6-methoxy-1*H*-indol-2-yl)thio)cyclobutyl)(naphthalen-2-yl)methanone **3w** as grey solid (0.058 g, 75% yield).

**R<sub>f</sub>** (Pet. ether /EtOAc = 90/10): 0.32; **<sup>1</sup>H NMR (400 MHz, CDCl<sub>3</sub>)** δ 8.29 (s, 1H), 8.23 (s, 1H), 7.93 (t, *J* = 10.1 Hz, 2H), 7.88 – 7.85 (m, 2H), 7.61 – 7.52 (m, 2H), 7.49 (d, *J* = 8.5 Hz, 1H), 6.84 – 6.81 (m, 2H), 6.71 (s, 1H), 4.15 – 4.08 (m, 1H), 3.84 (s, 3H), 3.80 – 3.73 (m, 1H), 2.83 – 2.77 (m, 2H), 2.50 – 2.43 (m, 2H). **<sup>13</sup>C NMR (100 MHz, CDCl<sub>3</sub>)** δ 200.4, 157.1, 138.2, 135.7, 132.6, 130.1, 129.7, 128.7, 127.9, 126.9, 124.6, 124.1, 123.0, 121.2, 111.0, 110.6, 94.1, 55.7, 39.9, 38.2, 32.3. **HRMS (ESI)** *m/z*: [M+H]<sup>+</sup> calcd for C<sub>24</sub>H<sub>22</sub>NO<sub>2</sub>S 388.1366; found 388.1372. **FTIR (cm<sup>-1</sup>)** 3349, 2939, 1669, 1448, 1355, 1181.

### Naphthalen-2-yl(3-((6-phenyl-1*H*-indol-2-yl)thio)cyclobutyl)methanone (**3x**)

Following the general procedure, treatment of 6-phenylindoline-2-thione **1l** (0.046 g, 0.2 mmol) and bicyclo[1.1.0]butan-1-yl(naphthalen-2-yl)methanone **2a** (0.050 g, 0.24 mmol) with Sc(OTf)<sub>3</sub> (0.005 g, 0.01 mmol) in CH<sub>2</sub>Cl<sub>2</sub> (4.0 mL) at 25 °C for 12 h followed by flash column

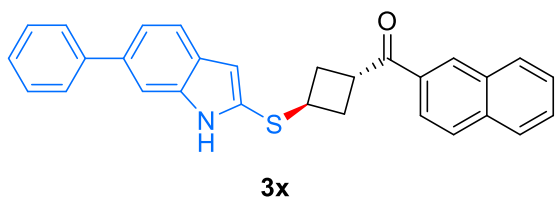

chromatography (Pet. ether/ EtOAc = 90/10) of the crude reaction mixture using silica gel afforded naphthalen-2-yl(3-((6-phenyl-1*H*-indol-2-yl)thio)cyclobutyl)methanone **3x** as brown sticky solid (0.055 g, 64% yield).

**R<sub>f</sub>** (Pet. ether /EtOAc = 90/10): 0.35; **<sup>1</sup>H NMR (400 MHz, CDCl<sub>3</sub>)** δ 8.31 (s, 1H), 8.25 (s, 1H), 7.97 – 7.85 (m, 4H), 7.67 – 7.52 (m, 6H), 7.47 – 7.40 (m, 3H), 7.34 (t, *J* = 7.3 Hz, 1H), 6.76 (s, 1H), 4.21 – 4.14 (m, 1H), 3.89 – 3.81 (m, 1H), 2.89 – 2.82 (m, 2H), 2.53 – 2.46 (m, 2H). **<sup>13</sup>C NMR (100 MHz, CDCl<sub>3</sub>)** δ 200.3, 142.1, 137.9, 136.5, 136.4, 135.8, 132.6, 130.1, 129.7, 128.9, 128.7, 128.7, 128.1, 127.9, 127.6, 127.5, 127.0, 124.2, 120.7, 120.4, 110.2, 109.3, 39.9, 38.3, 32.5. **HRMS (ESI)** *m/z*: [M+H]<sup>+</sup> calcd for C<sub>29</sub>H<sub>24</sub>NOS 434.1573; found 434.1581. **FTIR (cm<sup>-1</sup>)** 3335, 2928, 1670, 1443, 1355, 1182.

### 3-((7-Methyl-1*H*-indol-2-yl)thio)cyclobutyl)naphthalen-2-ylmethanone (**3y**)

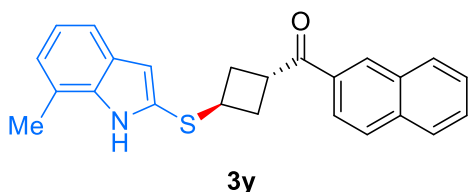

Following the general procedure, treatment of 7-methylindoline-2-thione **1m** (0.032 g, 0.2 mmol) and bicyclo[1.1.0]butan-1-yl(naphthalen-2-yl)methanone **2a** (0.050 g, 0.24 mmol) with Sc(OTf)<sub>3</sub> (0.005 g, 0.01

mmol) in CH<sub>2</sub>Cl<sub>2</sub> (4.0 mL) at 25 °C for 12 h followed by flash column chromatography (Pet. ether/ EtOAc = 90/10) of the crude reaction mixture using silica gel afforded 3-((7-methyl-1*H*-indol-2-yl)thio)cyclobutyl)naphthalen-2-ylmethanone **3y** as blue sticky solid (0.040 g, 51% yield).

**R<sub>f</sub>** (Pet. ether /EtOAc = 90/10): 0.35; **<sup>1</sup>H NMR (400 MHz, CDCl<sub>3</sub>)** δ 8.31 (s, 1H), 8.09 (s, 1H), 7.96 – 7.92 (m, 2H), 7.89 – 7.85 (m, 2H), 7.61 – 7.53 (m, 2H), 7.47 (d, *J* = 7.4 Hz, 1H), 7.08 – 7.02 (m, 2H), 6.76 – 6.76 (m, 1H), 4.20 – 4.13 (m, 1H), 3.87 – 3.80 (m, 1H), 2.87 – 2.80 (m, 2H), 2.51 (s, 3H), 2.51 – 2.45 (m, 2H). **<sup>13</sup>C NMR (100 MHz, CDCl<sub>3</sub>)** δ 200.3, 137.1, 135.7, 132.6, 130.1, 129.7, 128.7, 128.7, 128.3, 127.9, 126.9, 126.4, 124.1, 123.5, 120.6, 120.1, 118.2, 111.0, 39.9, 38.2, 32.4, 16.8. **HRMS (ESI)** *m/z*: [M+H]<sup>+</sup> calcd for C<sub>24</sub>H<sub>22</sub>NOS 372.1417; found 372.1425. **FTIR (cm<sup>-1</sup>)** 3352, 2933, 1669, 1446, 1346, 1185.

### 3-((7-Methoxy-1*H*-indol-2-yl)thio)cyclobutyl)naphthalen-2-ylmethanone (**3z**)

Following the general procedure, treatment of 7-methoxyindoline-2-thione **1n** (0.036 g, 0.2 mmol) and bicyclo[1.1.0]butan-1-yl(naphthalen-2-yl)methanone **2a** (0.050 g, 0.24 mmol) with

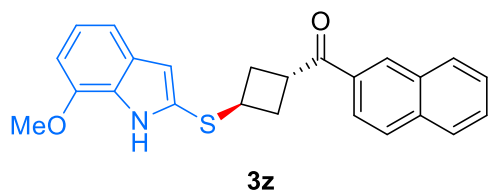

Sc(OTf)<sub>3</sub> (0.005 g, 0.01 mmol) in CH<sub>2</sub>Cl<sub>2</sub> (4.0 mL) at 25 °C for 12 h followed by flash column chromatography (Pet. ether/ EtOAc = 90/10) of the crude reaction mixture using silica gel afforded 3-((7-methoxy-1*H*-indol-2-yl)thio)cyclobutyl(naphthalen-2-yl)methanone **3z** as green solid (0.055 g, 70% yield).

**R<sub>f</sub>** (Pet. ether /EtOAc = 90/10): 0.33; **<sup>1</sup>H NMR (400 MHz, CDCl<sub>3</sub>)** δ 8.40 (s, 1H), 8.30 (s, 1H), 7.96 – 7.92 (m, 2H), 7.88 – 7.85 (m, 2H), 7.61 – 7.53 (m, 2H), 7.22 (d, *J* = 8.0 Hz, 1H), 7.05 (t, *J* = 7.9 Hz, 1H), 6.73–6.72 (m, 1H), 6.67 (d, *J* = 7.7 Hz, 1H), 4.17 – 4.10 (m, 1H), 3.97 (s, 3H), 3.84 – 3.77 (m, 1H), 2.85 – 2.79 (m, 2H), 2.51 – 2.43 (m, 2H). **<sup>13</sup>C NMR (100 MHz, CDCl<sub>3</sub>)** δ 200.2, 145.7, 135.7, 132.6, 132.6, 130.1, 129.9, 129.7, 128.6, 128.6, 128.1, 127.9, 126.9, 126.2, 124.1, 120.7, 113.1, 110.8, 102.5, 55.5, 39.8, 38.2, 32.3. **HRMS (ESI)** *m/z*: [M+H]<sup>+</sup> calcd for C<sub>24</sub>H<sub>22</sub>NO<sub>2</sub>S 388.1366; found 388.1376. **FTIR (cm<sup>-1</sup>)** 3344, 2842, 1672, 1579, 1357, 1254.

### (3-((3,4-Dihydro-2*H*-pyrrol-5-yl)thio)cyclobutyl)(naphthalen-2-yl)methanone (**5a**)

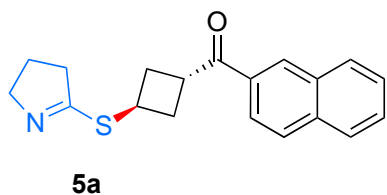

Following the general procedure, treatment of pyrrolidine-2-thione **4a** (0.020 g, 0.2 mmol) and bicyclo[1.1.0]butan-1-yl(naphthalen-2-yl)methanone **2a** (0.050 g, 0.24 mmol) with Sc(OTf)<sub>3</sub> (0.005 g, 0.01 mmol) in CH<sub>2</sub>Cl<sub>2</sub> (4.0 mL) at 25 °C for 12 h followed by flash column chromatography (Pet. ether/ EtOAc = 92/08) of the crude reaction mixture using silica gel afforded (3-((3,4-dihydro-2*H*-pyrrol-5-yl)thio)cyclobutyl)(naphthalen-2-yl)methanone **5a** as white solid (0.042 g, 68% yield).

**R<sub>f</sub>** (Pet. ether /EtOAc = 90/10): 0.36; **<sup>1</sup>H NMR (400 MHz, CDCl<sub>3</sub>)** δ 8.34 (s, 1H), 7.99 – 7.85 (m, 4H), 7.61 – 7.52 (m, 2H), 4.38 – 4.30 (m, 1H), 4.20 – 4.13 (m, 1H), 3.82 (t, *J* = 7.2 Hz, 2H), 3.07 – 3.00 (m, 2H), 2.61 (t, *J* = 8.2 Hz, 2H), 2.51 – 2.44 (m, 2H), 1.96 (p, *J* = 7.8 Hz, 2H). **<sup>13</sup>C NMR (100 MHz, CDCl<sub>3</sub>)** δ 200.0, 171.9, 135.7, 132.6, 132.6, 130.1, 129.7, 128.6, 128.6, 127.9, 126.9, 124.2, 61.3, 39.5, 38.7, 35.6, 32.5, 23.3. **HRMS (ESI)** *m/z*: [M+H]<sup>+</sup> calcd for C<sub>19</sub>H<sub>20</sub>NOS 312.1260; found 312.1262. **FTIR (cm<sup>-1</sup>)** 2942, 2315, 1675, 1589, 1538, 1217.

### Naphthalen-2-yl(3-((3,4,5,6-tetrahydropyridin-2-yl)thio)cyclobutyl)methanone (**5b**)

Following the general procedure, treatment of piperidine-2-thione **4b** (0.023 g, 0.2 mmol) and bicyclo[1.1.0]butan-1-yl(naphthalen-2-yl)methanone **2a** (0.050 g, 0.24 mmol) with Sc(OTf)<sub>3</sub>

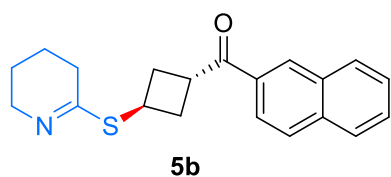

(0.005 g, 0.01 mmol) in CH<sub>2</sub>Cl<sub>2</sub> (4.0 mL) at 25 °C for 12 h followed by flash column chromatography (Pet. ether/ EtOAc = 90/10) of the crude reaction mixture using silica gel afforded naphthalen-2-yl(3-((3,4,5,6-tetrahydropyridin-2-

yl)thio)cyclobutyl)methanone **5b** as sticky solid (0.043 g, 67% yield).

**R<sub>f</sub>** (Pet. ether /EtOAc = 90/10): 0.36; **<sup>1</sup>H NMR (400 MHz, CDCl<sub>3</sub>)** δ 8.35 (s, 1H), 7.99 – 7.93 (m, 2H), 7.90 – 7.85 (m, 2H), 7.61 – 7.52 (m, 2H), 4.35 – 4.25 (m, 1H), 4.13 – 4.06 (m, 1H), 3.68 – 3.57 (m, 2H), 3.01 – 2.94 (m, 2H), 2.44 – 2.37 (m, 2H), 2.27 (t, *J* = 6.4 Hz, 2H), 1.73 – 1.69 (m, 2H), 1.63 – 1.57 (m, 2H). **<sup>13</sup>C NMR (100 MHz, CDCl<sub>3</sub>)** δ 200.2, 165.1, 135.7, 132.8, 132.7, 130.1, 129.7, 128.6, 128.5, 127.9, 126.8, 124.3, 50.7, 39.5, 36.5, 34.0, 32.4, 31.3, 22.6, 20.2. **HRMS (ESI)** *m/z*: [M+H]<sup>+</sup> calcd for C<sub>20</sub>H<sub>22</sub>NOS 324.1417; found 324.1422. **FTIR (cm<sup>-1</sup>)** 2935, 1673, 1351, 1260, 1181, 1127.

#### Naphthalen-2-yl(3-((3,4,5,6-tetrahydro-2*H*-azepin-7-yl)thio)cyclobutyl)methanone (**5c**)

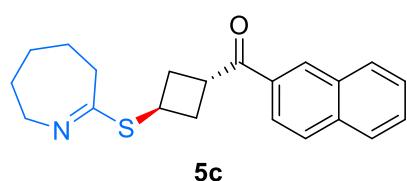

Following the general procedure, treatment of azepane-2-thione **4c** (0.026 g, 0.2 mmol) and bicyclo[1.1.0]butan-1-yl(naphthalen-2-yl)methanone **2a** (0.050 g, 0.24 mmol) with Sc(OTf)<sub>3</sub> (0.005 g, 0.01 mmol) in CH<sub>2</sub>Cl<sub>2</sub> (4.0 mL) at 25 °C

for 12 h followed by flash column chromatography (Pet. ether/ EtOAc = 90/10) of the crude reaction mixture using silica gel afforded naphthalen-2-yl(3-((3,4,5,6-tetrahydro-2*H*-azepin-7-yl)thio)cyclobutyl)methanone **5c** as yellowish sticky solid (0.055 g, 79% yield).

**R<sub>f</sub>** (Pet. ether /EtOAc = 90/10): 0.36; **<sup>1</sup>H NMR (400 MHz, CDCl<sub>3</sub>)** δ 8.35 (s, 1H), 7.98 – 7.94 (m, 2H), 7.90 – 7.85 (m, 2H), 7.62 – 7.52 (m, 2H), 4.35 – 4.25 (m, 1H), 4.05 – 3.98 (m, 1H), 3.60 – 3.58 (m, 2H), 3.02 – 2.93 (m, 2H), 2.49 – 2.35 (m, 4H), 1.79 – 1.73 (m, 2H), 1.55 – 1.47 (m, 4H). **<sup>13</sup>C NMR (100 MHz, CDCl<sub>3</sub>)** δ 200.2, 171.1, 135.7, 132.8, 132.7, 130.0, 129.7, 128.7, 128.6, 128.5, 127.9, 126.9, 126.8, 124.3, 124.2, 53.0, 39.6, 36.6, 34.9, 32.1, 31.4, 27.1, 24.3. **HRMS (ESI)** *m/z*: [M+H]<sup>+</sup> calcd for C<sub>21</sub>H<sub>24</sub>NOS 338.1573; found 338.1578. **FTIR (cm<sup>-1</sup>)** 2928, 1674, 1457, 1356, 1263, 1182.

#### 3-(((*E*)-3,4,5,6,7,8-Hexahydroazocin-2-yl)thio)cyclobutyl(naphthalen-2-yl)methanone (**5d**)

Following the general procedure, treatment of azocane-2-thione **4d** (0.029 g, 0.2 mmol) and bicyclo[1.1.0]butan-1-yl(naphthalen-2-yl)methanone **2a** (0.050 g, 0.24 mmol) with Sc(OTf)<sub>3</sub>



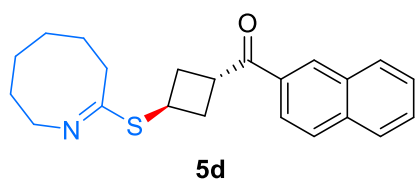

(0.005 g, 0.01 mmol) in CH<sub>2</sub>Cl<sub>2</sub> (4.0 mL) at 25 °C for 12 h followed by flash column chromatography (Pet. ether/ EtOAc = 90/10) of the crude reaction mixture using silica gel afforded 3-(((*E*)-3,4,5,6,7,8-hexahydroazocin-2-yl)thio)cyclobutyl)(naphthalen-2-yl)methanone **5d** as yellowish sticky solid (0.048 g, 71% yield).

**R<sub>f</sub>** (Pet. ether /EtOAc = 90/10): 0.36; **<sup>1</sup>H NMR (400 MHz, CDCl<sub>3</sub>)** δ 8.35 (s, 1H), 7.99 – 7.93 (m, 2H), 7.89 – 7.85 (m, 2H), 7.60 – 7.51 (m, 2H), 4.35 – 4.27 (m, 1H), 4.11 – 4.04 (m, 1H), 3.59 (t, *J* = 5.8 Hz, 2H), 3.02 – 2.95 (m, 2H), 2.43 – 2.36 (m, 4H), 1.70 – 1.62 (m, 4H), 1.51 – 1.45 (m, 2H), 1.37 – 1.31 (m, 2H). **<sup>13</sup>C NMR (100 MHz, CDCl<sub>3</sub>)** δ 200.2, 168.9, 135.7, 132.8, 132.6, 130.0, 129.6, 128.6, 128.5, 127.9, 126.8, 124.2, 49.7, 39.6, 34.4, 32.1, 32.1, 30.5, 29.2, 25.9, 24.5. **HRMS (ESI)** *m/z*: [M+H]<sup>+</sup> calcd for C<sub>22</sub>H<sub>26</sub>NOS 352.1730; found 352.1734. **FTIR (cm<sup>-1</sup>)** 2925, 1674, 1445, 1356, 1221, 1182.

### (3-((3,4-Dihydroquinolin-2-yl)thio)cyclobutyl)(naphthalen-2-yl)methanone (5e)

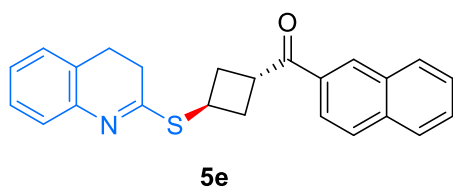

Following the general procedure, treatment of 3,4-dihydroquinoline-2(1*H*)-thione **4e** (0.033 g, 0.2 mmol) and bicyclo[1.1.0]butan-1-yl(naphthalen-2-yl)methanone **2a** (0.050 g, 0.24 mmol) with Sc(OTf)<sub>3</sub> (0.005 g, 0.01 mmol) in CH<sub>2</sub>Cl<sub>2</sub> (4.0 mL) at 25 °C for 12 h followed by flash column chromatography (Pet. ether/ EtOAc = 90/10) of the crude reaction mixture using silica gel afforded (3-((3,4-dihydroquinolin-2-yl)thio)cyclobutyl)(naphthalen-2-yl)methanone **5e** as white solid (0.048 g, 65% yield).

**R<sub>f</sub>** (Pet. ether /EtOAc = 90/10): 0.35; **<sup>1</sup>H NMR (400 MHz, CDCl<sub>3</sub>)** δ 8.37 (s, 1H), 8.02 – 7.87 (m, 4H), 7.62 – 7.53 (m, 2H), 7.19 – 7.18 (m, 2H), 7.08 – 7.03 (m, 2H), 4.42 – 4.34 (m, 2H), 3.14 – 3.07 (m, 2H), 2.79 (t, *J* = 8.0 Hz, 2H), 2.59 – 2.46 (m, 4H). **<sup>13</sup>C NMR (100 MHz, CDCl<sub>3</sub>)** δ 200.2, 168.4, 144.5, 135.7, 132.7, 132.7, 130.1, 129.7, 128.7, 128.6, 127.9, 127.6, 127.5, 126.9, 126.6, 125.7, 125.6, 124.3, 39.6, 34.9, 32.1, 29.7, 24.5. **HRMS (ESI)** *m/z*: [M+H]<sup>+</sup> calcd for C<sub>24</sub>H<sub>22</sub>NOS 372.1417; found 372.1422. **FTIR (cm<sup>-1</sup>)** 2941, 1676, 1572, 1473, 1357, 1189.

### 3-((3,4-Dihydro-2H-pyrrol-5-yl)thio)cyclobutyl)pentan-1-one (**5f**)

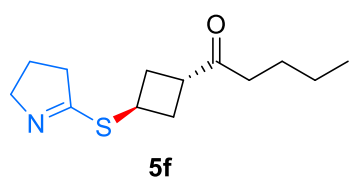

Following the general procedure, treatment of pyrrolidine-2-thione **5a** (0.020 g, 0.2 mmol) and 1-(bicyclo[1.1.0]butan-1-yl)pentan-1-one **2g** (0.033 g, 0.24 mmol) with Sc(OTf)<sub>3</sub> (0.005 g, 0.01 mmol) in CH<sub>2</sub>Cl<sub>2</sub> (4.0 mL) at 25 °C for 12 h followed by flash column chromatography (Pet. ether/ EtOAc = 90/10) of the crude reaction mixture using silica gel afforded 3-((3,4-dihydro-2H-pyrrol-5-yl)thio)cyclobutyl)pentan-1-one **5f** as white sticky solid (0.035 g, 73% yield).

**R<sub>f</sub>** (Pet. ether /EtOAc = 90/10): 0.38; **<sup>1</sup>H NMR (400 MHz, CDCl<sub>3</sub>)** δ 4.06 – 4.00 (m, 1H), 3.81 – 3.78 (m, 2H), 3.45 – 3.37 (m, 1H), 2.79 – 2.72 (m, 2H), 2.57 – 2.53 (m, 2H), 2.34 (t, *J* = 7.4 Hz, 2H), 2.23 – 2.16 (m, 2H), 1.96 – 1.88 (m, 2H), 1.56 – 1.48 (m, 2H), 1.32–1.22 (m, 2H), 0.87 (t, *J* = 7.3 Hz, 3H). **<sup>13</sup>C NMR (100 MHz, CDCl<sub>3</sub>)** δ 211.1, 171.8, 61.3, 42.4, 40.2, 38.7, 35.3, 31.7, 25.9, 23.2, 22.5, 13.9. **HRMS (ESI)** *m/z*: [M+H]<sup>+</sup> calcd for C<sub>13</sub>H<sub>22</sub>NOS 240.1417; found 240.1421. **FTIR (cm<sup>-1</sup>)** 2946, 1706, 1589, 1365, 1294, 1081.

### (3-((3,3-Dimethyl-3H-indol-2-yl)thio)cyclobutyl)(naphthalen-2-yl)methanone (**5g**)

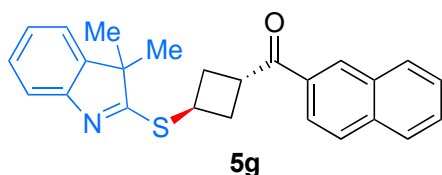

Following the general procedure, treatment of 3,3-dimethylindoline-2-thione **4g** (0.035 g, 0.2 mmol) and bicyclo[1.1.0]butan-1-yl(naphthalen-2-yl)methanone **2a** (0.050 g, 0.24 mmol) with Sc(OTf)<sub>3</sub> (0.005 g, 0.01 mmol) in CH<sub>2</sub>Cl<sub>2</sub> (4.0 mL) at 25 °C for 12 h followed by flash column chromatography (Pet. ether/ EtOAc = 92/08) of the crude reaction mixture using silica gel afforded (3-((3,3-dimethyl-3H-indol-2-yl)thio)cyclobutyl)(naphthalen-2-yl)methanone **5g** as white solid (0.032 g, 42% yield). **R<sub>f</sub>** (Pet. ether /EtOAc = 90/10): 0.36; **<sup>1</sup>H NMR (400 MHz, CDCl<sub>3</sub>)** δ 8.37 (s, 1H), 8.02 – 7.87 (m, 4H), 7.62 – 7.53 (m, 2H), 7.43 (d, *J* = 7.7 Hz, 1H), 7.28 – 7.24 (m, 2H), 7.12 (t, *J* = 7.4 Hz, 1H), 4.46 – 4.37 (m, 2H), 3.18 (dt, *J* = 14.9, 8.4 Hz, 2H), 2.62 – 2.55 (m, 2H), 1.37 (s, 6H). **<sup>13</sup>C NMR (100 MHz, CDCl<sub>3</sub>)** δ 200.0, 188.0, 154.1, 145.7, 135.8, 132.7, 130.2, 129.7, 128.7, 128.6, 127.9, 127.8, 126.9, 124.3, 124.2, 121.1, 119.0, 55.2, 39.6, 35.5, 32.6, 25.4. **HRMS (ESI)** *m/z*: [M+H]<sup>+</sup> calcd for C<sub>25</sub>H<sub>24</sub>NOS 386.1573; found 386.1575. **FTIR (cm<sup>-1</sup>)** 2929, 1675, 1506, 1458, 1188, 1036.

**(10-Methyl-5-phenyl-2,3,5,10-tetrahydro-4H-2,4-methanothiepine[2,3-b]indol-4-yl)(naphthalen-2-yl)methanone (5i)**

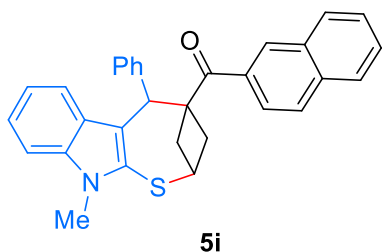

Following the general procedure, treatment of 3-benzylidene-1-methylindoline-2-thione **4i** (0.050 g, 0.2 mmol) and bicyclo[1.1.0]butan-1-yl(naphthalen-2-yl)methanone **2a** (0.021 g, 0.1 mmol) with Bi(OTf)<sub>3</sub> (0.006 g, 0.01 mmol) in CH<sub>2</sub>Cl<sub>2</sub> (4.0 mL) at 25 °C for 12 h followed by flash column chromatography (Pet. ether/ EtOAc = 95/5) of the crude

reaction mixture using silica gel afforded (10-methyl-5-phenyl-2,3,5,10-tetrahydro-4H-2,4-methanothiepine[2,3-b]indol-4-yl)(naphthalen-2-yl)methanone **5i** as white solid (0.025 g, 55% yield).

**R<sub>f</sub>** (Pet. ether /EtOAc = 90/10): 0.35; **<sup>1</sup>H NMR (400 MHz, CDCl<sub>3</sub>)** δ 8.20 (s, 1H), 7.91 – 7.85 (m, 4H), 7.64 – 7.60 (m, 1H), 7.56 – 7.52 (m, 1H), 7.27 (d, *J* = 8.2 Hz, 1H), 7.13 – 7.07 (m, 4H), 6.92 – 6.81 (m, 4H), 5.50 (s, 1H), 3.81 (s, 3H), 3.76 – 3.71 (m, 1H), 3.46 – 3.40 (m, 1H), 3.28 – 3.23 (m, 1H), 3.12 (d, *J* = 12.6 Hz, 1H), 2.79 – 2.75 (m, 1H). **<sup>13</sup>C NMR (100 MHz, CDCl<sub>3</sub>)** δ 202.5, 140.6, 137.9, 135.3, 132.5, 132.3, 131.2, 130.7, 129.9, 129.1, 128.9, 128.7, 128.5, 128.2, 127.8, 127.0, 126.9, 125.4, 121.0, 119.2, 118.5, 111.0, 108.0, 55.6, 49.6, 39.0, 36.6, 33.5, 30.8. **HRMS (ESI) m/z:** [M+Na]<sup>+</sup> calcd for C<sub>31</sub>H<sub>25</sub>NOSNa 482.1549; found 482.1556. **FTIR (cm<sup>-1</sup>)** 3059, 1672, 1464, 1353, 1268, 1187.

## 9. Product Functionalization

### a) Dearomatization of Indoles via dibromination at C3

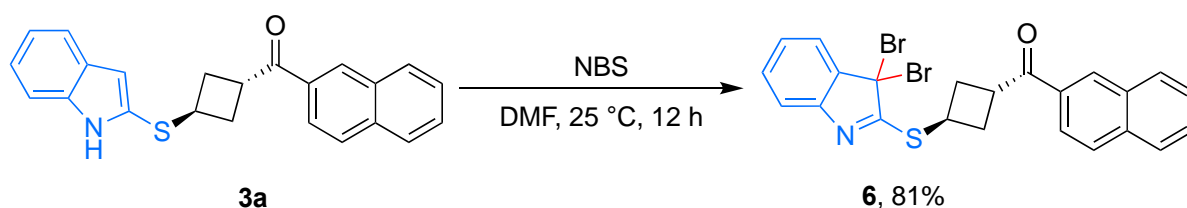

To a solution of **3a** (0.021 g, 0.06 mmol) in 2.0 mL DMF was added NBS (0.107 g, 0.18 mmol) and then the reaction mixture was stirred at 25 °C for 12 h. After completion, the reaction mixture was diluted with EtOAc (10 mL), washed with H<sub>2</sub>O (5 mL × 3), brine (5 mL × 2) and the organic layer was separated and dried over Na<sub>2</sub>SO<sub>4</sub>. The crude residue was purified using flash silica gel column chromatography (Pet. ether /EtOAc = 94/06) to afford (3-((3,3-dibromo-3H-indol-2-yl)thio)cyclobutyl)(naphthalen-2-yl)methanone **6** as a yellow solid (0.025 g, 81% yield).

**R<sub>f</sub>** (Pet. ether /EtOAc = 90/10): 0.39; **<sup>1</sup>H NMR (400 MHz, CD<sub>3</sub>Cl<sub>3</sub>)** δ 8.38 (s, 1H), 8.02 – 7.87 (m, 4H), 7.64 – 7.54 (m, 3H), 7.35 – 7.29 (m, 2H), 7.26 – 7.22 (m, 1H), 4.51 – 4.42 (m, 2H), 3.22 – 3.15 (m, 2H), 2.69 – 2.62 (m, 2H). **<sup>13</sup>C NMR (100 MHz, CD<sub>3</sub>Cl<sub>3</sub>)** δ 199.7, 180.4, 148.6, 140.5, 135.8, 132.7, 132.5, 131.4, 130.2, 129.7, 128.8, 128.7, 127.9, 127.0, 126.4, 124.2, 123.9, 119.7, 50.7, 39.4, 36.5, 32.4. **HRMS (ESI)** m/z: [M+Na]<sup>+</sup> calcd for C<sub>23</sub>H<sub>17</sub>Br<sub>2</sub>NNaOs 535.9290; found 535.9296. **FTIR (cm<sup>-1</sup>)** 2938, 2065, 1672, 1503, 1451, 1186.

**b) Conversion to sulfoxide 7**

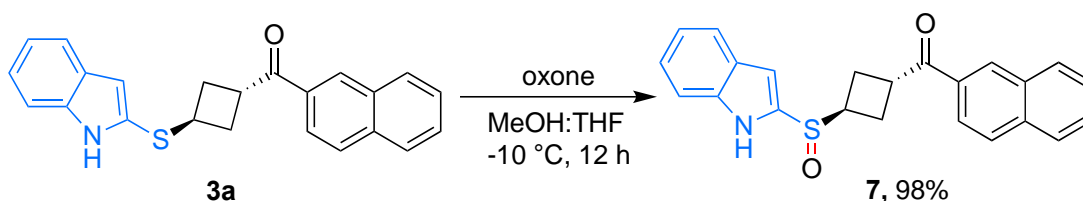

Following the general procedure,<sup>9</sup> into the stirred solution of **3a** (0.021 g, 0.06 mmol) in methanol: THF (1:1, 2 mL) was added solution of oxone (0.018 g, 0.03 mmol, 0.5 equiv.) in methanol: THF (1:1, 1 mL) dropwise at 0 °C. After addition, the reaction was stirred at -10 °C for 12 h. Then the reaction mixture was poured into the ice water and extracted with ethyl acetate (3 x 10 mL). The combined organic layers were dried over Na<sub>2</sub>SO<sub>4</sub>. The solvent was removed under reduced pressure. The crude product was purified with column chromatography (Pet. ether /EtOAc = 70/30) to give the (3-(1H-indol-2-yl)sulfinyl)cyclobutyl (naphthalen-2-yl)methanone **7** as a white solid (0.022 g, 98% yield) (*The relative configuration of the newly generated stereocentre was not unequivocally determined*).

**R<sub>f</sub>** (Pet. ether /EtOAc = 80/20): 0.12; **<sup>1</sup>H NMR (400 MHz, CD<sub>3</sub>Cl<sub>3</sub>)** δ 10.71 (s, 1H), 8.23 (s, 1H), 7.87 (dt, *J* = 17.1, 7.5 Hz, 4H), 7.64 – 7.52 (m, 4H), 7.31 – 7.26 (m, 1H), 7.16 – 7.12 (m, 1H), 6.82 – 6.82 (m, 1H), 4.16 – 4.09 (m, 1H), 3.90 (p, *J* = 7.7 Hz, 1H), 3.20 – 3.12 (m, 1H), 2.83 – 2.73 (m, 2H), 2.66 – 2.59 (m, 1H). **<sup>13</sup>C NMR (100 MHz, CD<sub>3</sub>Cl<sub>3</sub>)** δ 199.4, 137.7, 135.8, 133.3, 132.6, 132.2, 130.2, 129.7, 128.8, 128.8, 127.9, 127.5, 127.0, 124.4, 124.0, 121.7, 120.9, 112.3, 104.7, 54.5, 37.8, 25.2, 24.1. **HRMS (ESI)** m/z: [M+H]<sup>+</sup> calcd for C<sub>23</sub>H<sub>20</sub>NO<sub>2</sub>S 374.1209; found 374.1212. **FTIR (cm<sup>-1</sup>)** 3191, 2315, 2148, 1741, 1674, 1026.

<sup>9</sup> A. Saputra, R. Fan, T. Yao, J. Chen and J. Tan, *Adv. Synth. Catal.*, 2020, **362**, 2683.

### c) Conversion to sulfone **8**

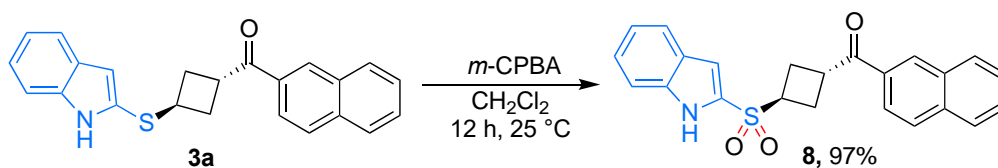

Compound **8** was synthesized following the modified literature procedure.<sup>10</sup> To a dry Schlenk tube containing compound **3a** (0.021 g, 0.06 mmol) in CH<sub>2</sub>Cl<sub>2</sub> (2.0 mL), *m*-CPBA (0.047 g, 0.15 mmol) was added at 0 °C and the resulting mixture was allowed to stir overnight at 25 °C. After the completion of the reaction, the reaction mixture was quenched with aqueous NaHCO<sub>3</sub> solution, and extracted with CH<sub>2</sub>Cl<sub>2</sub> for three times, then the combined organic layer was washed with saturated brine and dried over anhydrous Na<sub>2</sub>SO<sub>4</sub>. CH<sub>2</sub>Cl<sub>2</sub> was removed under reduced pressure, and crude reaction mixture was purified by flash column chromatography using silica gel (Pet. ether /EtOAc = 60/40) to afford (3-((1*H*-indol-2-yl)sulfonyl)cyclobutyl)(naphthalen-2-yl)methanone **8** as a white solid (0.023 g, 97% yield).

**R<sub>f</sub>** (Pet. ether /EtOAc = 80/20): 0.19; **<sup>1</sup>H NMR (400 MHz, CDCl<sub>3</sub>)** δ 9.26 (s, 1H), 8.32 (s, 1H), 7.96 – 7.86 (m, 4H), 7.73 (d, *J* = 8.1 Hz, 1H), 7.63 – 7.50 (m, 3H), 7.40 (t, *J* = 7.6 Hz, 1H), 7.26 – 7.21 (m, 2H), 4.33 (p, *J* = 8.2 Hz, 1H), 3.96 (p, *J* = 9.5 Hz, 1H), 3.02 – 2.95 (m, 2H), 2.83 – 2.76 (m, 2H). **<sup>13</sup>C NMR (100 MHz, CDCl<sub>3</sub>)** δ 199.2, 137.3, 135.9, 132.6, 132.0, 130.4, 130.4, 129.8, 128.9, 128.9, 127.9, 127.2, 127.1, 126.5, 124.0, 122.9, 121.9, 112.5, 110.1, 55.4, 37.4, 25.6. **HRMS (ESI)** *m/z*: [M+H]<sup>+</sup> calcd for C<sub>23</sub>H<sub>20</sub>NO<sub>3</sub>S 390.1158; found 390.1162. **FTIR (cm<sup>-1</sup>)** 3321, 2313, 1918, 1673, 1511, 1364.

### d) Reduction of the ketone

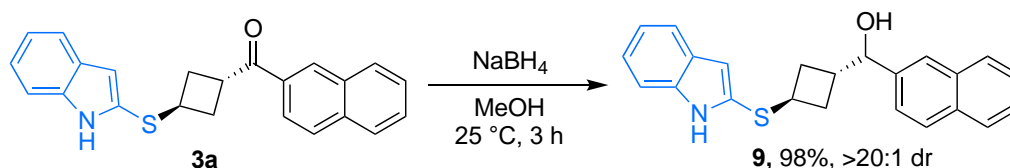

Following the general procedure,<sup>11</sup> treatment of **3a** (0.021 g, 0.06 mmol), NaBH<sub>4</sub> (0.009 g, 0.24 mmol) in MeOH (1 mL) at 25 °C for 3 h followed by purification via silica gel flash column chromatography (Pet. ether /EtOAc = 80/20) of the crude reaction mixture afforded (3-((1*H*-indol-2-yl)thio)cyclobutyl)(naphthalen-2-yl)methanol **9** as a colorless oil (0.021 g, 98% yield) (*The relative configuration of the newly generated stereocentre was not unequivocally determined*).

<sup>10</sup> S. Barik, S. Shee, R. G. Gonnade, and A. T. Biju *Org. Lett.*, 2022, **24**, 8848.

<sup>11</sup> A. Guin, R. N. Gaykar, S. Deswal and A. T. Biju, *Org. Lett.*, 2021, **23**, 7456.

**R<sub>f</sub>** (Pet. ether /EtOAc = 80/20): 0.18; **<sup>1</sup>H NMR (400 MHz, CDCl<sub>3</sub>)** δ 8.10 (s, 1H), 7.82 (dd, *J* = 9.1, 6.7 Hz, 3H), 7.72 (s, 1H), 7.56 (d, *J* = 7.9 Hz, 1H), 7.49 (ddt, *J* = 10.1, 6.3, 3.5 Hz, 2H), 7.41 (dd, *J* = 8.5, 1.6 Hz, 1H), 7.30 – 7.26 (m, 1H), 7.21 – 7.17 (m, 1H), 7.12 – 7.08 (m, 1H), 6.62 (d, *J* = 1.4 Hz, 1H), 4.79 (d, *J* = 7.6 Hz, 1H), 3.78 – 3.71 (m, 1H), 2.89 – 2.80 (m, 1H), 2.58 – 2.52 (m, 1H), 2.30 – 2.01 (m, 4H). **<sup>13</sup>C NMR (100 MHz, CDCl<sub>3</sub>)** δ 140.2, 137.1, 133.2, 133.2, 128.7, 128.5, 128.0, 127.9, 127.8, 126.4, 126.1, 125.1, 124.3, 122.7, 120.3, 120.2, 110.7, 109.5, 77.2, 39.8, 38.3, 31.8, 31.5. **HRMS (ESI)** *m/z*: [M+H]<sup>+</sup> calcd for C<sub>23</sub>H<sub>22</sub>NOS 360.1417; found 360.1421. **FTIR (cm<sup>-1</sup>)** 3403, 2934, 1508, 1337, 1250.

**e) Vinyl magnesium bromide addition to 3a**

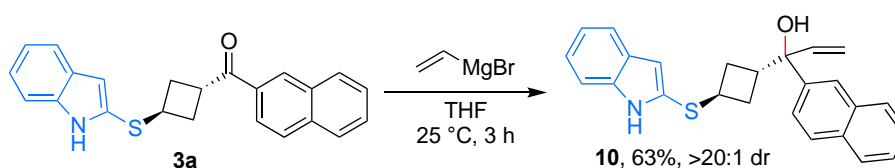

To a solution of **3a** (0.021 g, 0.06 mmol) in THF (1.0 mL) vinyl magnesium bromide solution (0.24 mL, 1M solution in THF) was added dropwise at 0 °C under argon. After that, the reaction mixture was stirred at 25 °C for 3 h, then the reaction was quenched by the addition of water (1 mL). The organic layer was washed with water, brine and dried over Na<sub>2</sub>SO<sub>4</sub>. After removal of the solvent under reduced pressure, the residue was purified by chromatography on a silica gel (Pet. ether /EtOAc = 75/25) of the crude reaction mixture to afford 1-(3-((1*H*-indol-2-yl)thio)cyclobutyl)-1-(naphthalen-2-yl)prop-2-en-1-ol **10** as a colorless oil (0.014 g, 63% yield) (*The relative configuration of the newly generated stereocentre was not unequivocally determined*).

**R<sub>f</sub>** (Pet. ether /EtOAc = 80/20): 0.26; **<sup>1</sup>H NMR (400 MHz, CDCl<sub>3</sub>)** δ 8.05 (s, 1H), 7.86 – 7.78 (m, 4H), 7.54 (d, *J* = 7.8 Hz, 1H), 7.48 – 7.43 (m, 3H), 7.29 (d, *J* = 8.1 Hz, 1H), 7.18 (t, *J* = 7.6 Hz, 1H), 7.09 (t, *J* = 7.4 Hz, 1H), 6.61 (d, *J* = 1.2 Hz, 1H), 6.15 (dd, *J* = 17.3, 10.7 Hz, 1H), 5.31 – 5.20 (m, 2H), 3.76 – 3.67 (m, 1H), 3.15 (p, *J* = 8.7 Hz, 1H), 2.58 – 2.51 (m, 1H), 2.45 – 2.38 (m, 1H), 2.19 – 2.13 (m, 1H), 2.01 (s, 1H), 1.93- 1.87 (m, 1H). **<sup>13</sup>C NMR (100 MHz, CDCl<sub>3</sub>)** δ 141.9, 141.5, 137.1, 133.2, 132.5, 128.7, 128.3, 128.1, 127.6, 126.3, 126.1, 124.1, 122.7, 120.3, 120.2, 114.2, 110.7, 109.2, 77.5, 39.9, 39.3, 30.1, 29.8. **HRMS (ESI)** *m/z*: [M+H]<sup>+</sup> calcd for C<sub>25</sub>H<sub>24</sub>NOS 386.1573; found 386.1577. **FTIR (cm<sup>-1</sup>)** 3391, 2938, 1669, 1506, 1345, 1255.

f) 1,6-Conjugate addition of **3a** to *para*-quinone methides

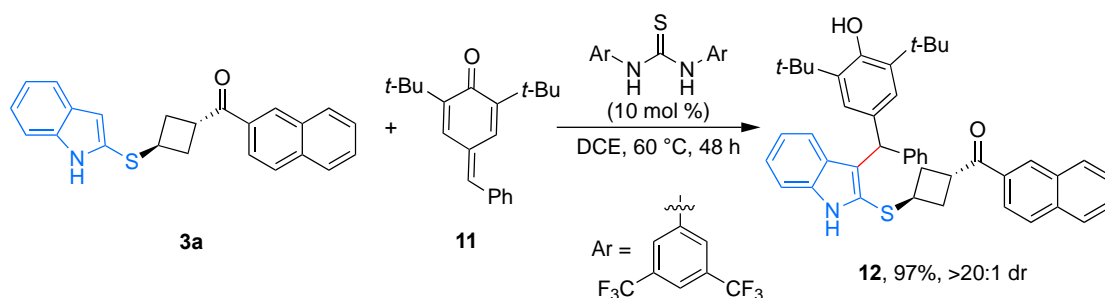

To a solution of *p*-QM **11** (0.015 g, 0.06 mmol) and **3a** (0.021 g, 0.06 mmol) in anhydrous DCE (2 mL) was added thiourea catalyst (0.003 g, 10 mol%) and stirred at 60 °C for 48 h. Evaporation of the solvent under reduced pressure and further purification of the residue by flash chromatography on silica gel (petro ether / EtOAc = 85/15) furnished the 3-(3-(3,5-di-*tert*-butyl-4-hydroxyphenyl)(phenyl)methyl)-1*H*-indol-2-ylthio)cyclobutyl(naphthalen-2-yl)methanone **12** as a white solid (0.032 g, 97% yield) (*The relative configuration of the newly generated stereocentre was not unequivocally determined*).<sup>12</sup>

**R<sub>f</sub>** (Pet. ether / EtOAc = 90/10): 0.29; **<sup>1</sup>H NMR** (400 MHz, CDCl<sub>3</sub>) δ 8.20 – 8.17 (m, 2H), 7.88 – 7.83 (m, 5H), 7.56 (dddd, *J* = 21.6, 8.1, 6.9, 1.4 Hz, 2H), 7.32 – 7.22 (m, 4H), 7.19 – 7.11 (m, 5H), 6.91 (ddd, *J* = 8.1, 7.0, 1.0 Hz, 1H), 6.02 (s, 1H), 5.05 (s, 1H), 4.07 – 3.99 (m, 1H), 3.72 – 3.65 (m, 1H), 2.66 – 2.57 (m, 2H), 2.34 – 2.25 (m, 2H), 1.31 (s, 18H). **<sup>13</sup>C NMR** (100 MHz, CDCl<sub>3</sub>) δ 200.3, 152.1, 144.7, 137.1, 135.7, 135.5, 134.2, 132.6, 132.5, 130.0, 129.7, 129.2, 128.7, 128.1, 127.9, 127.2, 126.9, 126.1, 126.0, 125.9, 124.8, 124.1, 122.9, 121.7, 119.6, 110.8, 48.3, 40.2, 38.5, 34.4, 32.6, 32.5, 30.5. **HRMS (ESI)** *m/z*: [M+Na]<sup>+</sup> calcd for C<sub>44</sub>H<sub>45</sub>NNaO<sub>2</sub>S 674.3063; found 674.3070. **FTIR** (cm<sup>-1</sup>)<sup>1</sup> 3341, 2934, 1668, 1442, 1346, 1182.

g) *m*-CPBA oxidation to **5a**

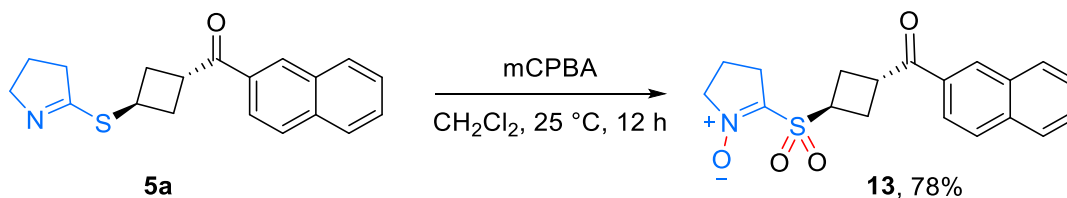

Compound **13** was synthesized following the modified literature procedure.<sup>10</sup> To a dry Schlenk tube containing compound **5a** (0.031 g, 0.1 mmol) in CH<sub>2</sub>Cl<sub>2</sub> (2.0 mL), *m*-CPBA (0.078 g, 0.25 mmol) was added at 0 °C and the resulting mixture was allowed to stir overnight at 25 °C. After the completion of the reaction, the reaction mixture was quenched with aqueous

<sup>12</sup> G. Wu, T. Li, F. Liu, Y. Zhao, S. Ma, S. Tang, X. Xie and X. She, *Tetrahedron Lett.*, 2021, **81**, 153315.

NaHCO<sub>3</sub> solution, and extracted with CH<sub>2</sub>Cl<sub>2</sub> three times, then the combined organic layer was washed with saturated brine and dried over anhydrous Na<sub>2</sub>SO<sub>4</sub>. CH<sub>2</sub>Cl<sub>2</sub> was removed under reduced pressure, and the crude reaction mixture was purified by flash column chromatography using silica gel (Pet. ether /EtOAc = 60/40) to afford 5-((3-(2-naphthoyl)cyclobutyl)sulfonyl)-3,4-dihydro-2*H*-pyrrole 1-oxide **13** as a sticky solid (0.027 g, 79% yield).

**R<sub>f</sub>** (Pet. ether /EtOAc = 80/20): 0.08; **<sup>1</sup>H NMR (400 MHz, CDCl<sub>3</sub>)** δ 8.35 (s, 1H), 7.97 (d, *J* = 8.3 Hz, 2H), 7.92 – 7.87 (m, 2H), 7.64 – 7.55 (m, 2H), 4.42 – 4.31 (m, 2H), 3.93 (t, *J* = 7.0 Hz, 2H), 3.01 – 2.84 (m, 4H), 2.57 (t, *J* = 8.0 Hz, 2H), 2.16 (p, *J* = 7.5 Hz, 2H). **<sup>13</sup>C NMR (100 MHz, CDCl<sub>3</sub>)** δ 198.9, 174.6, 135.9, 132.6, 132.0, 130.4, 129.7, 129.0, 128.0, 127.1, 124.0, 77.5, 77.2, 76.8, 52.9, 47.9, 37.8, 32.4, 25.8, 18.9. **HRMS (ESI)** *m/z*: [M+Na]<sup>+</sup> calcd for C<sub>19</sub>H<sub>19</sub>NO<sub>4</sub>SNa 380.0927; found 380.0937. **FTIR (cm<sup>-1</sup>)** 2950, 1732, 1676, 1348, 1155.

#### h) Vinyl magnesium bromide addition to **5a**

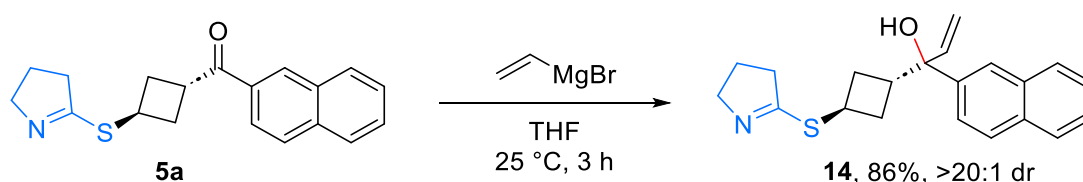

To a solution of **5a** (0.031 g, 0.1 mmol) in THF (2.0 mL) vinyl magnesium bromide solution (0.4 mL, 1M solution in THF) was added dropwise at 0 °C under argon. After that, the reaction mixture was stirred at 25 °C for 3 h, then the reaction was quenched by the addition of water (1 mL). The organic layer was washed with water, brine and dried over Na<sub>2</sub>SO<sub>4</sub>. After removal of the solvent under reduced pressure, the residue was purified by chromatography on a silica gel (Pet. ether /EtOAc = 75/25) of the crude reaction mixture to afford 1-(3-((3,4-dihydro-2*H*-pyrrol-5-yl)thio)cyclobutyl)-1-(naphthalen-2-yl)prop-2-en-1-ol **14** as a white solid (0.029 g, 86% yield) (The relative configuration of the newly generated stereocentre was not unequivocally determined).

**R<sub>f</sub>** (Pet. ether /EtOAc = 80/20): 0.18; **<sup>1</sup>H NMR (400 MHz, CDCl<sub>3</sub>)** δ 7.92 (s, 1H), 7.81 – 7.77 (m, 3H), 7.51 – 7.43 (m, 3H), 6.17 (dd, *J*<sub>1</sub> = 17.3 Hz, *J*<sub>2</sub> = 10.7 Hz, 1H), 5.32 (d, *J* = 17.3 Hz, 1H), 5.20 (d, *J* = 10.7 Hz, 1H), 4.16 – 4.10 (m, 1H), 3.70 (t, *J* = 6.9 Hz, 2H), 3.28 – 3.16 (m, 2H), 2.82 – 2.75 (m, 1H), 2.64 – 2.52 (m, 3H), 2.14 (t, *J* = 12.7 Hz, 1H), 1.86 (p, *J* = 7.6 Hz, 3H). **<sup>13</sup>C NMR (100 MHz, CDCl<sub>3</sub>)** δ 172.8, 142.0, 141.8, 133.2, 132.5, 128.3, 127.9, 127.5, 126.1, 125.9, 124.4, 124.3, 114.0, 77.4, 61.1, 40.7, 38.7, 34.9, 30.7, 29.8, 23.1. **HRMS (ESI)** *m/z*: [M+H]<sup>+</sup> calcd for C<sub>21</sub>H<sub>24</sub>NOS 338.1573; found 338.1573. **FTIR (cm<sup>-1</sup>)** 3206, 2936, 1582, 14221, 1295, 1085.



## 10. <sup>1</sup>H and <sup>13</sup>C NMR Spectra of Products

### (3-((1*H*-Indol-2-yl)thio)cyclobutyl)(naphthalen-2-yl)methanone (3a)

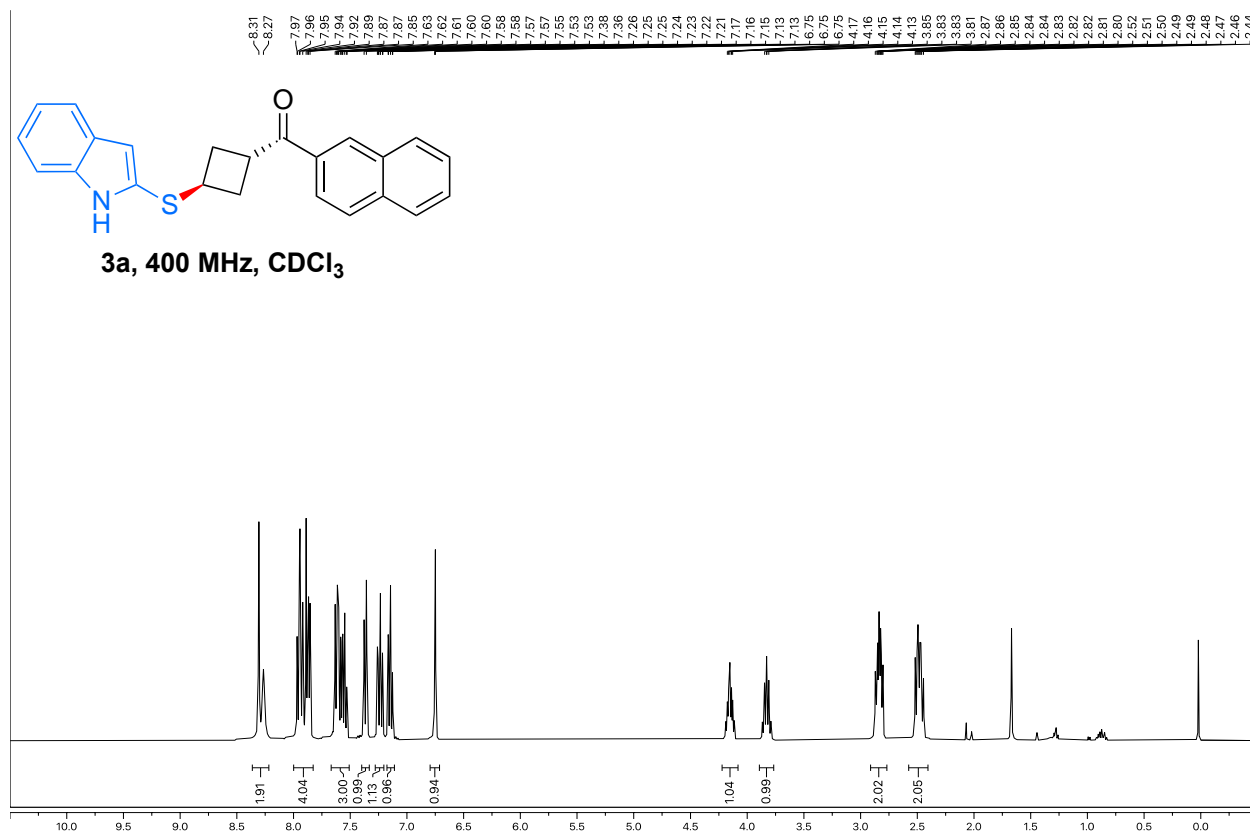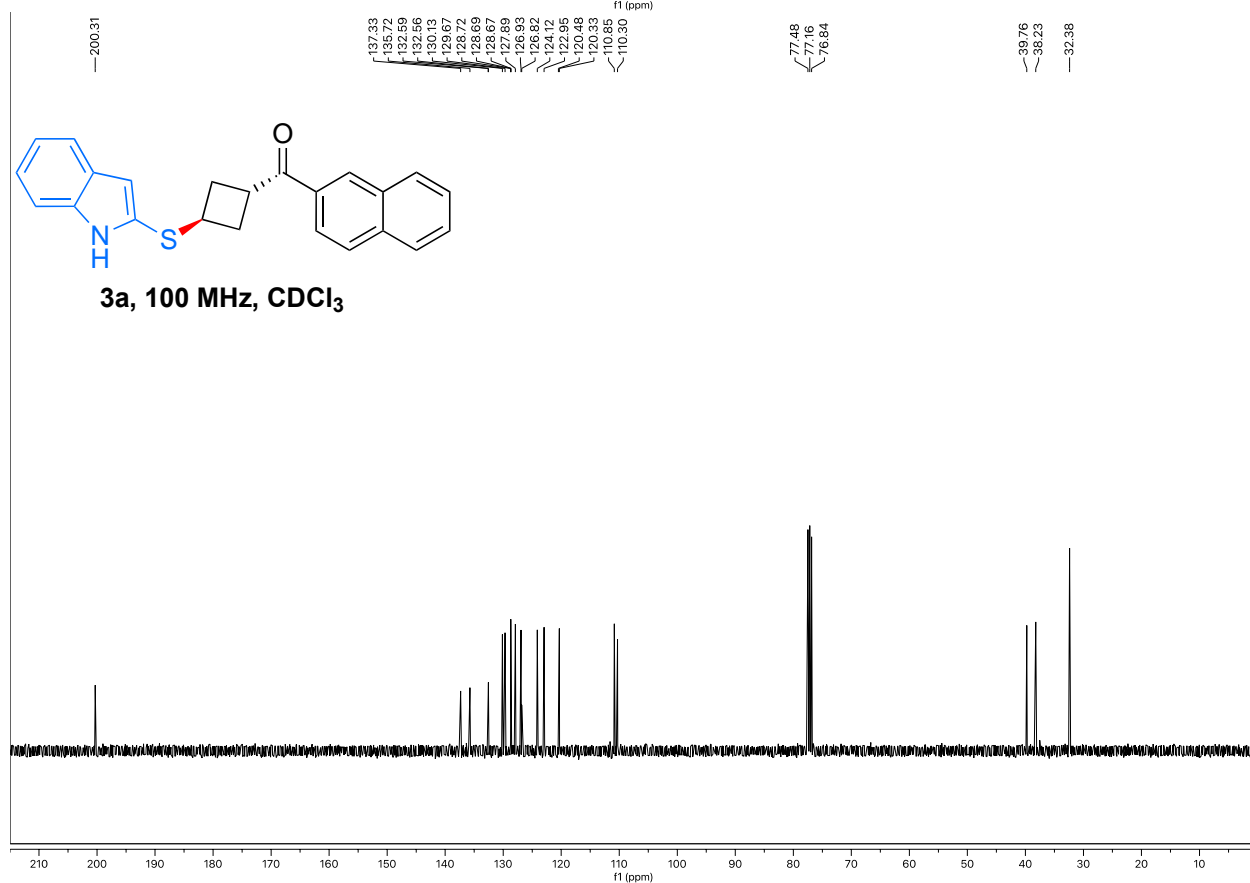

### 3-((1*H*-Indol-2-yl)thio)cyclobutyl(phenyl)methanone (3b)

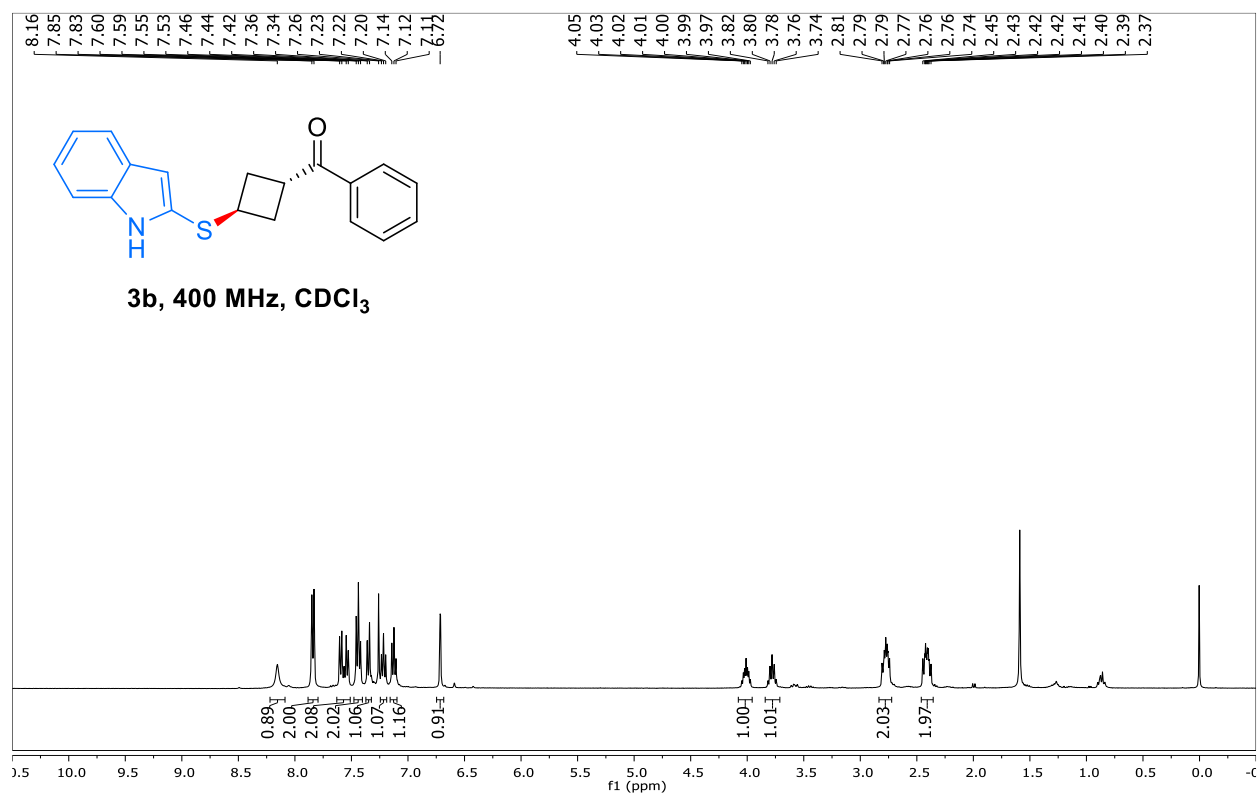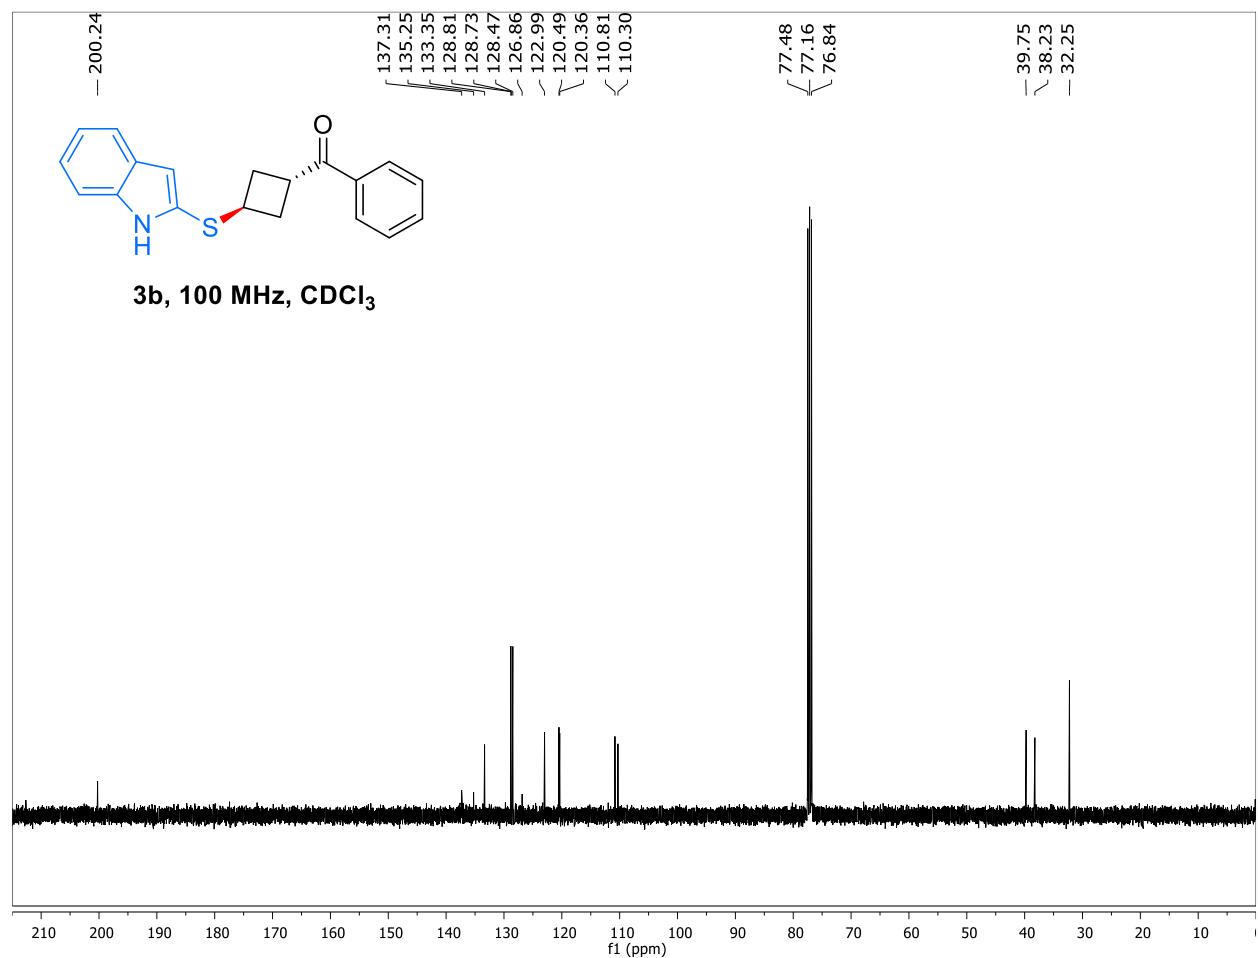

**(3-((1*H*-Indol-2-yl)thio)cyclobutyl)(*p*-tolyl)methanone (3c)**

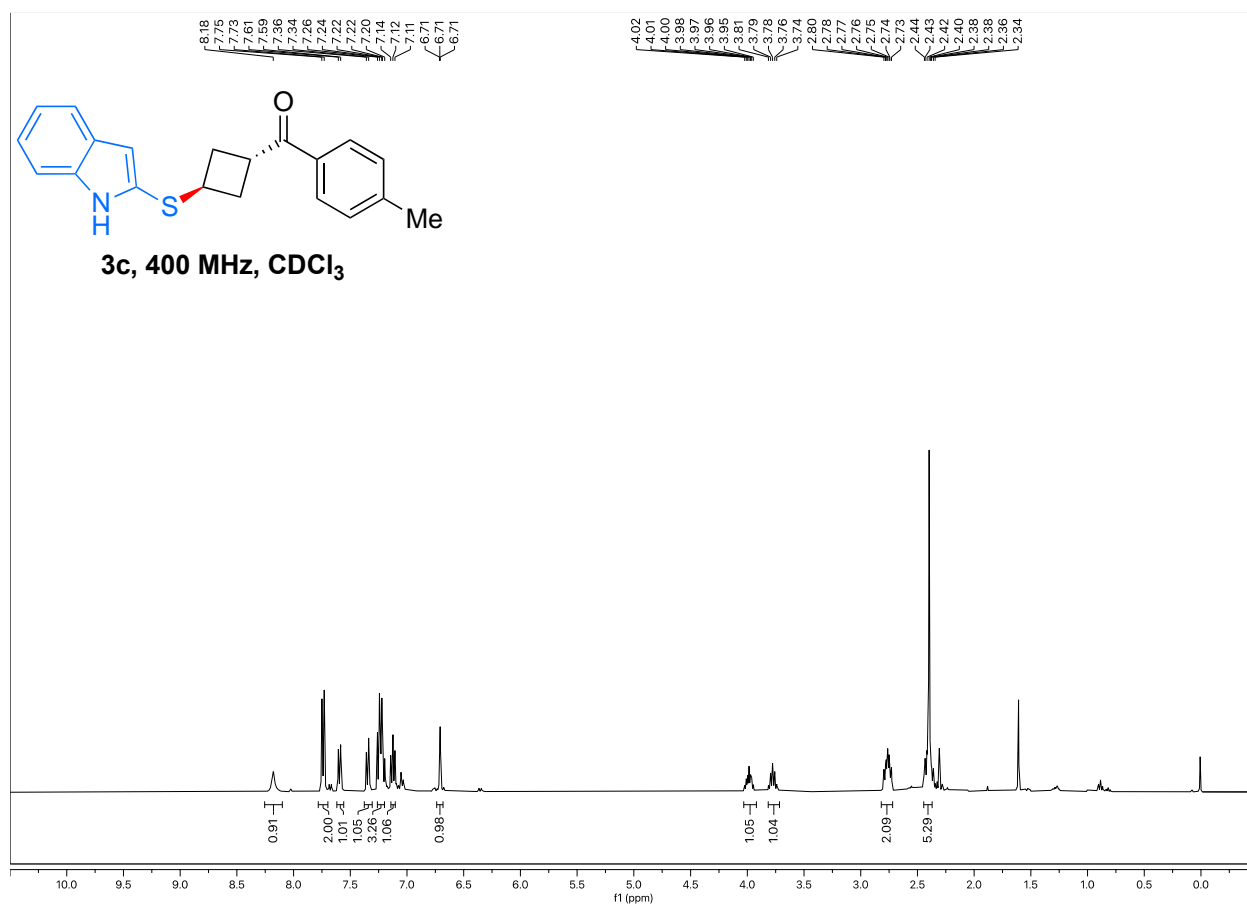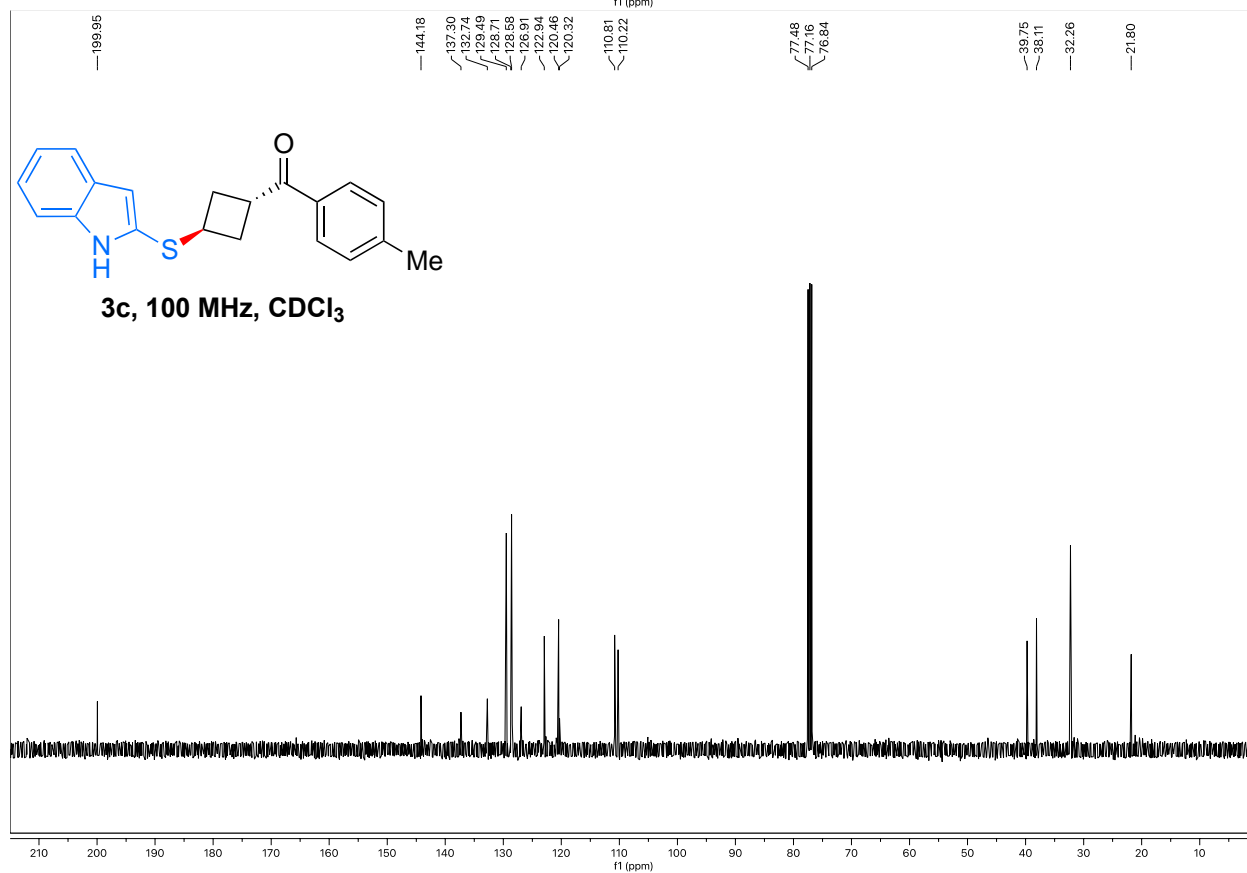

### 3-((1*H*-Indol-2-yl)thio)cyclobutyl(3-methoxyphenyl)methanone (3d)

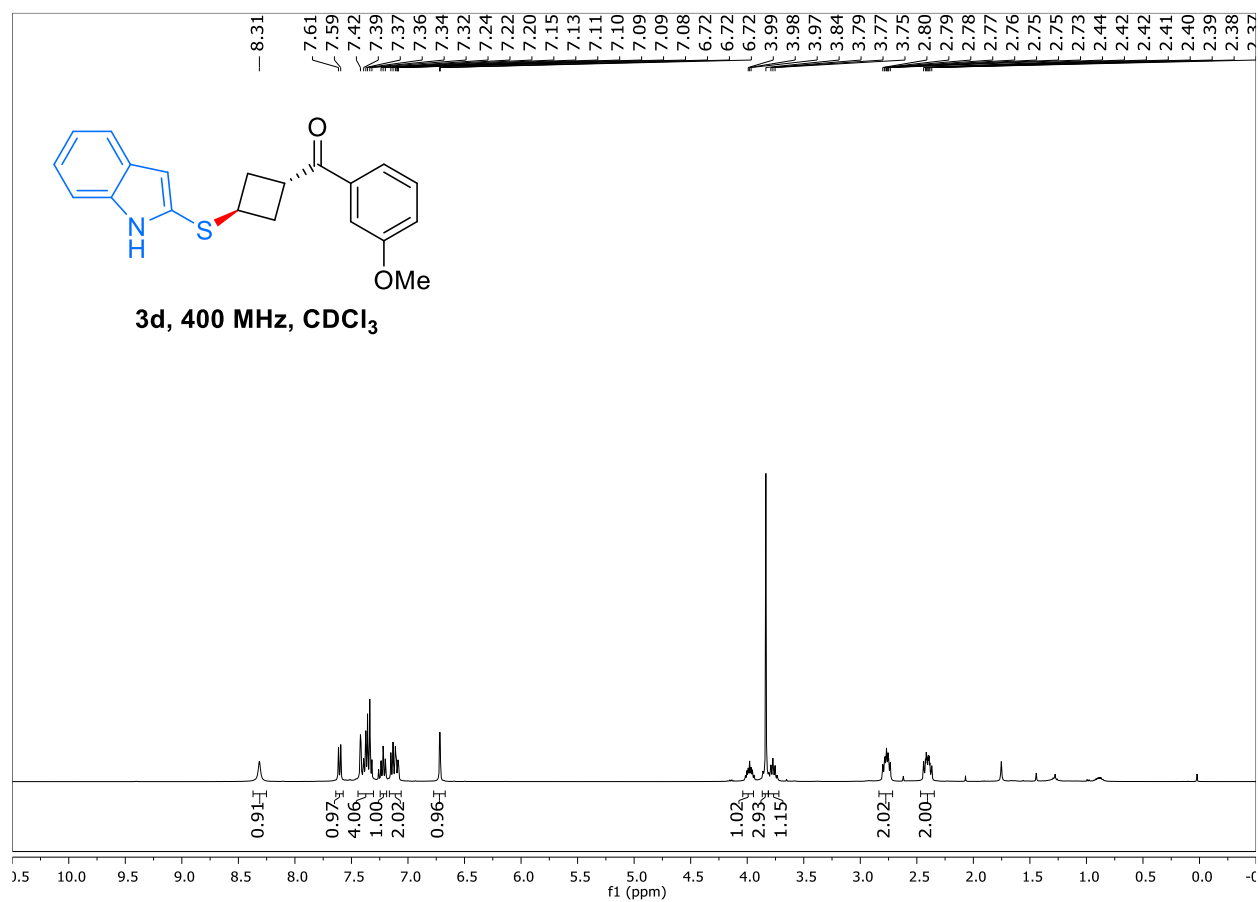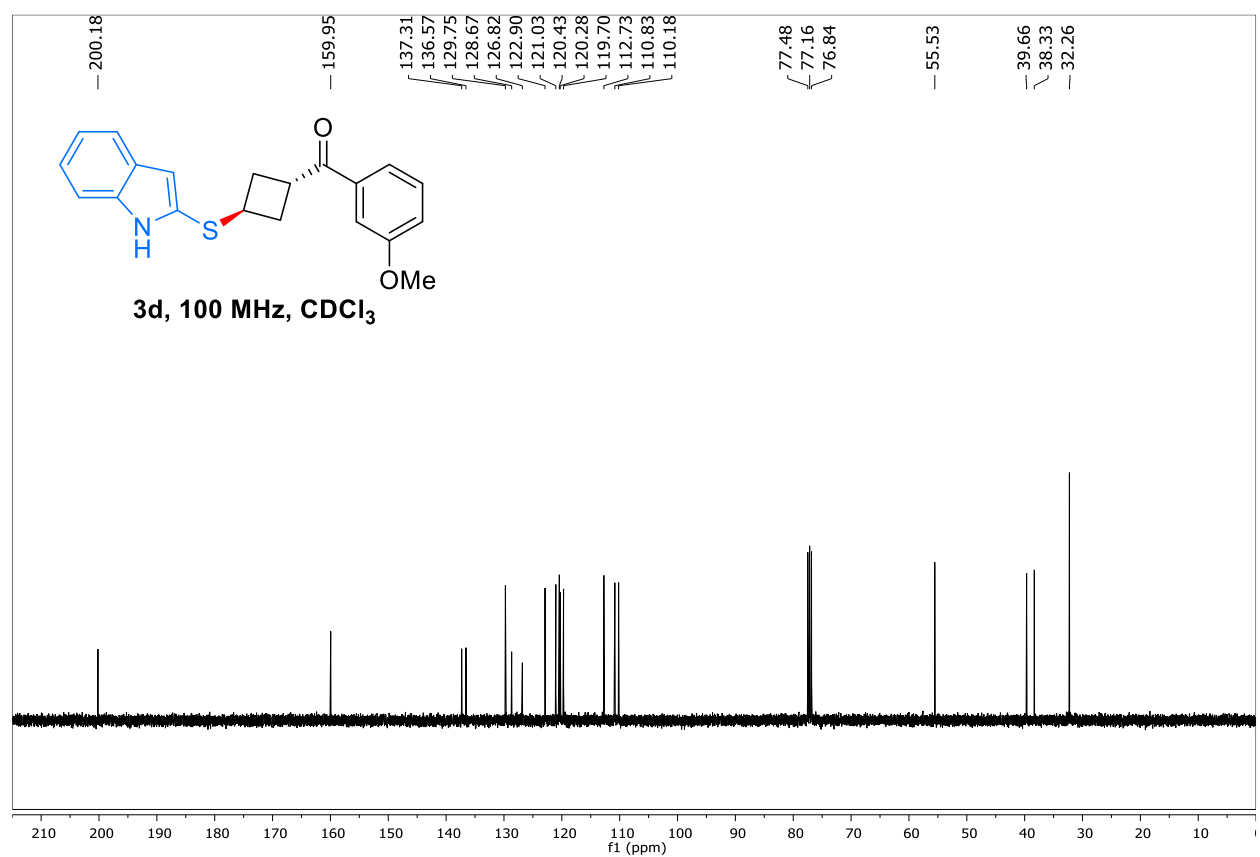

**3-((1*H*-Indol-2-yl)thio)cyclobutyl)(benzo[*d*][1,3]dioxol-5-yl)methanone (3e)**

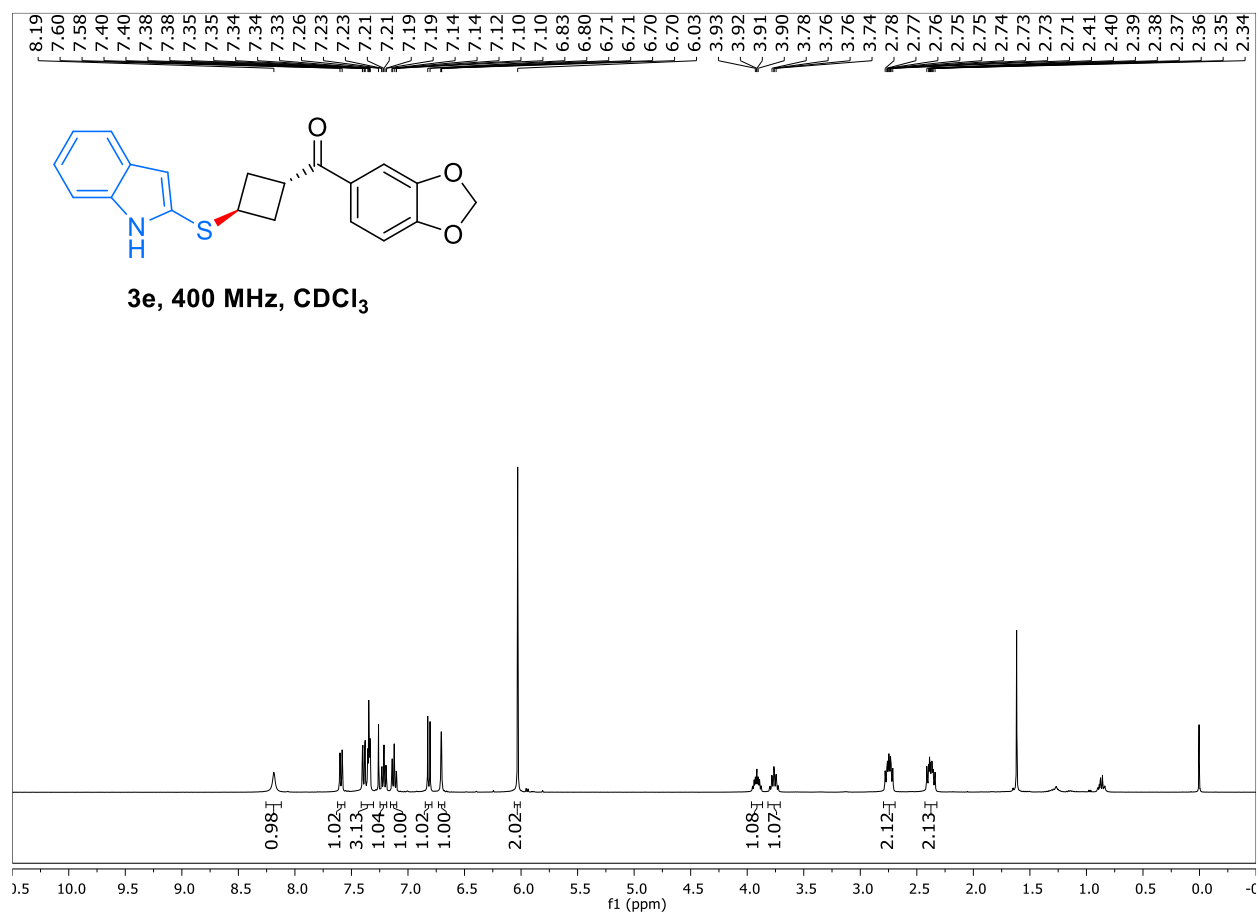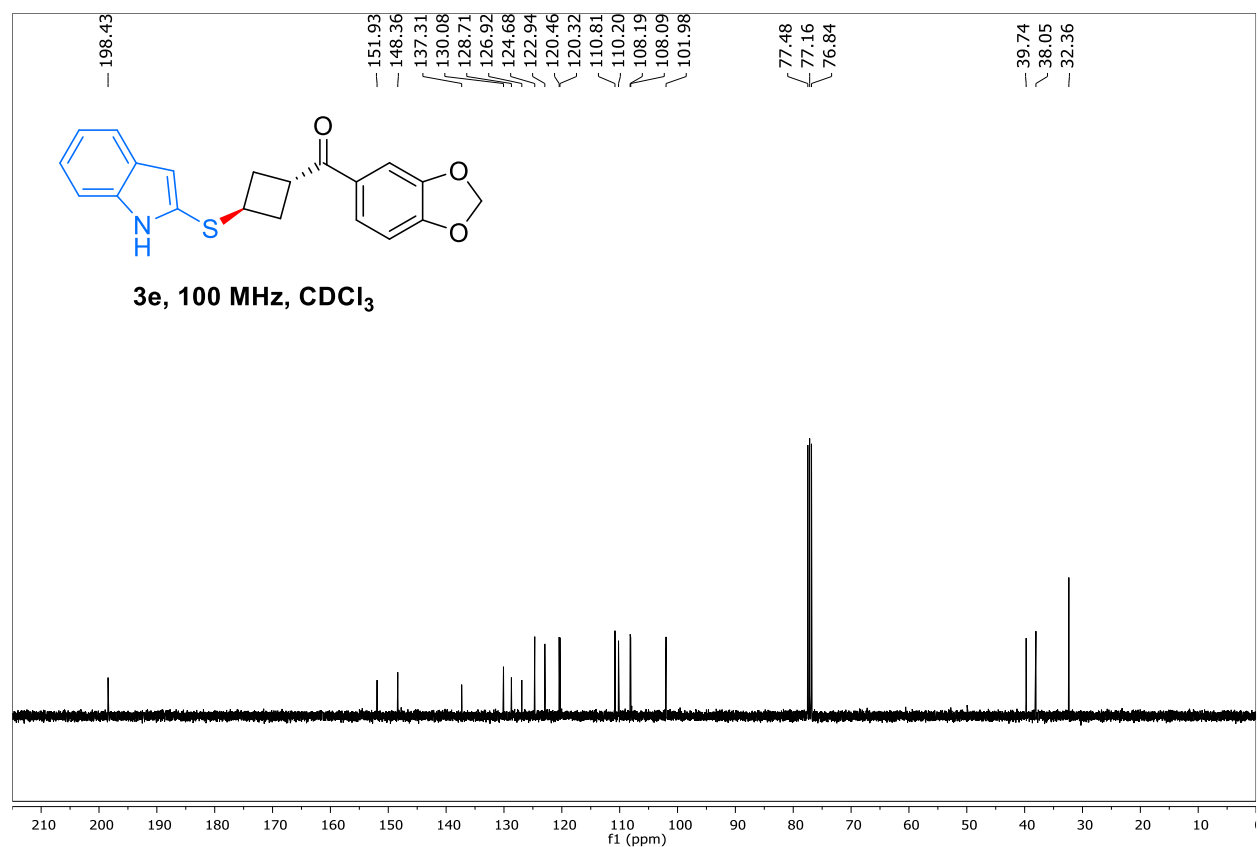

**(3-((1*H*-Indol-2-yl)thio)cyclobutyl)(thiophen-2-yl)methanone (3f)**

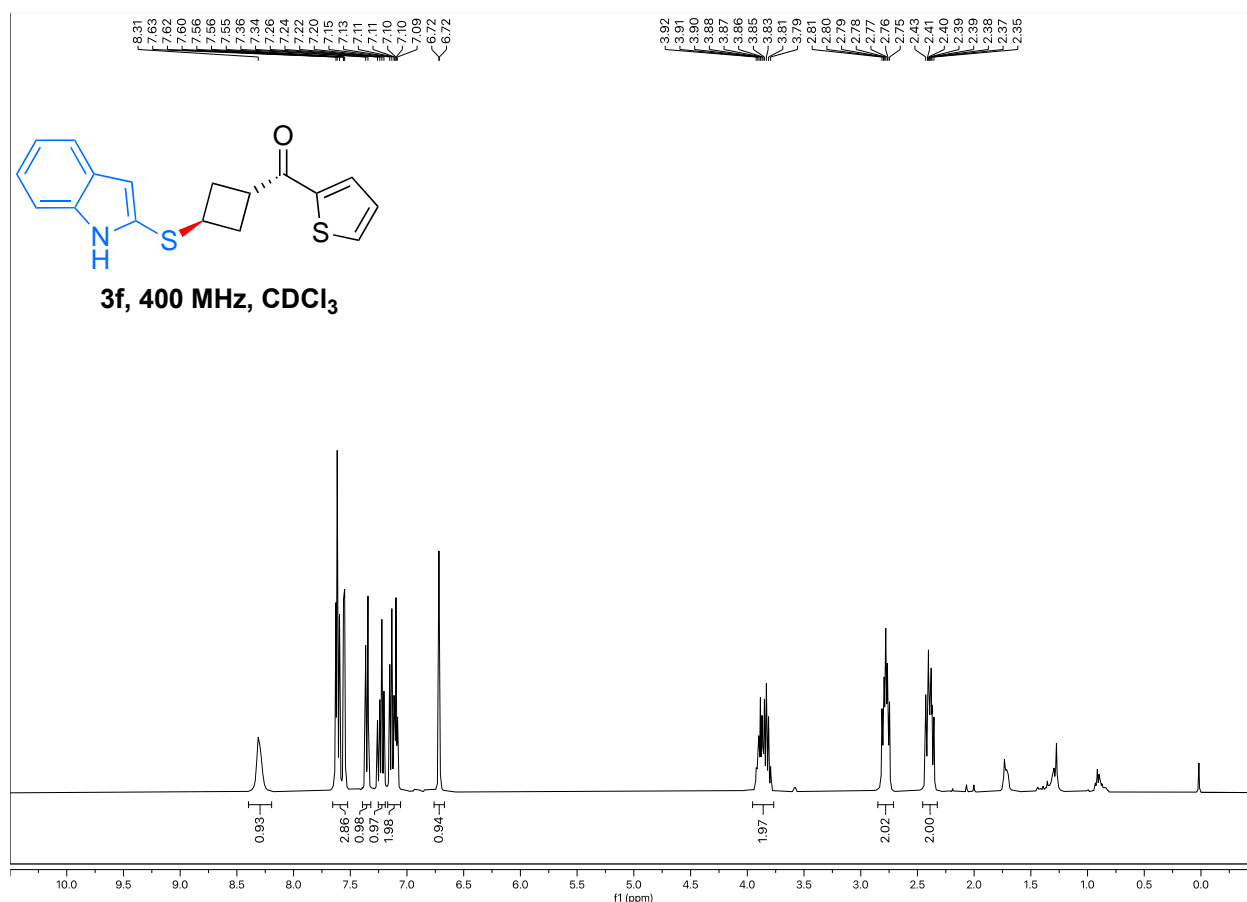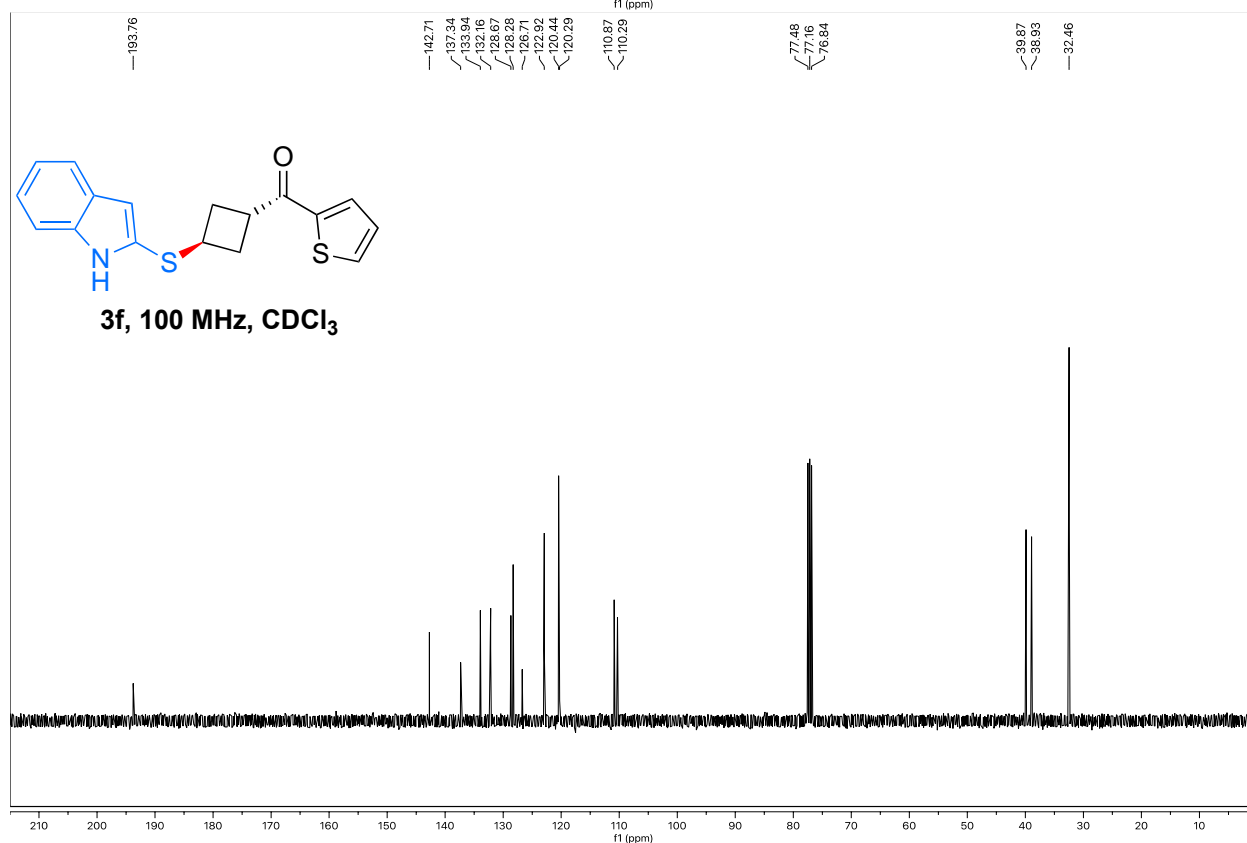

# 1-(3-((1*H*-Indol-2-yl)thio)cyclobutyl)pentan-1-one (3g)

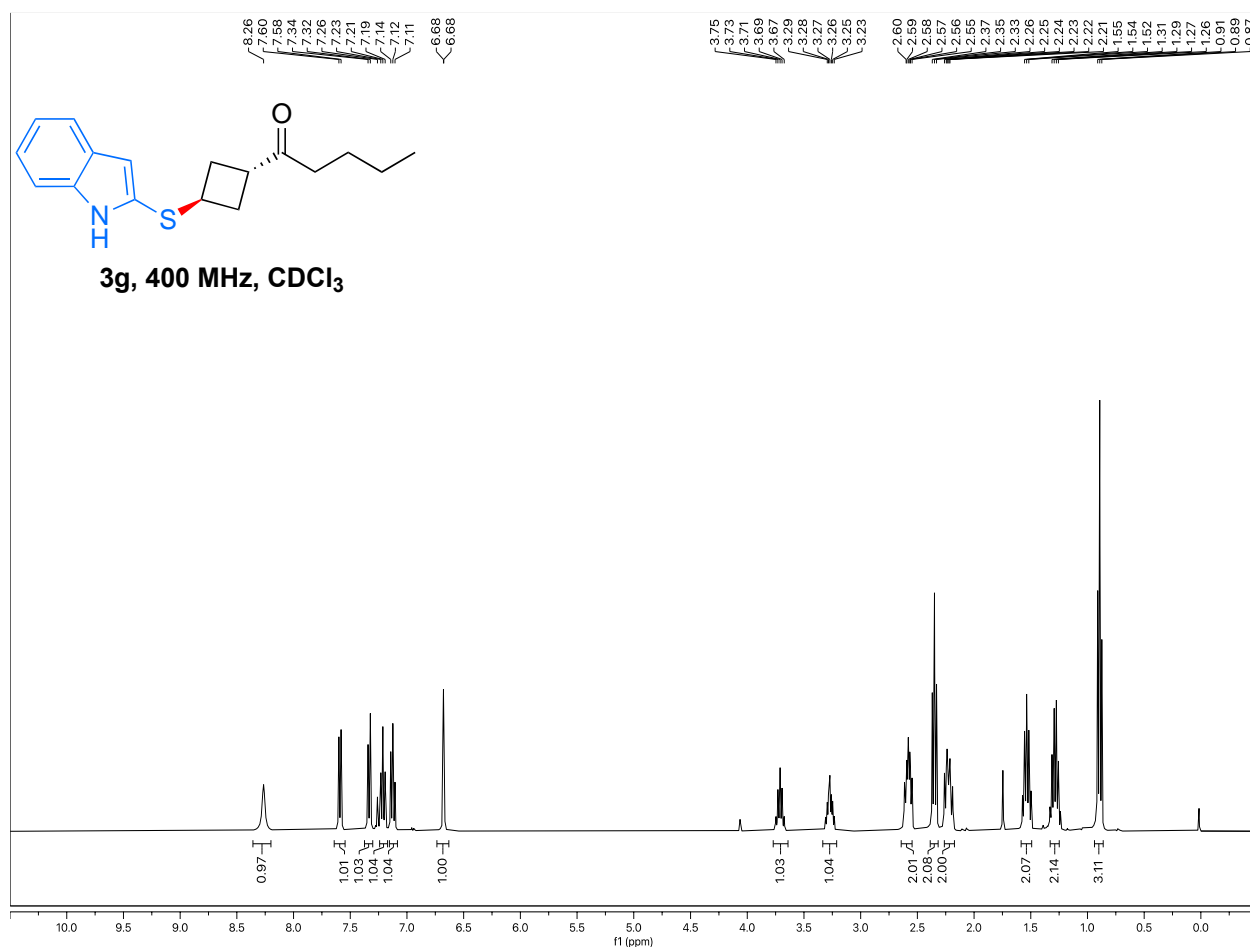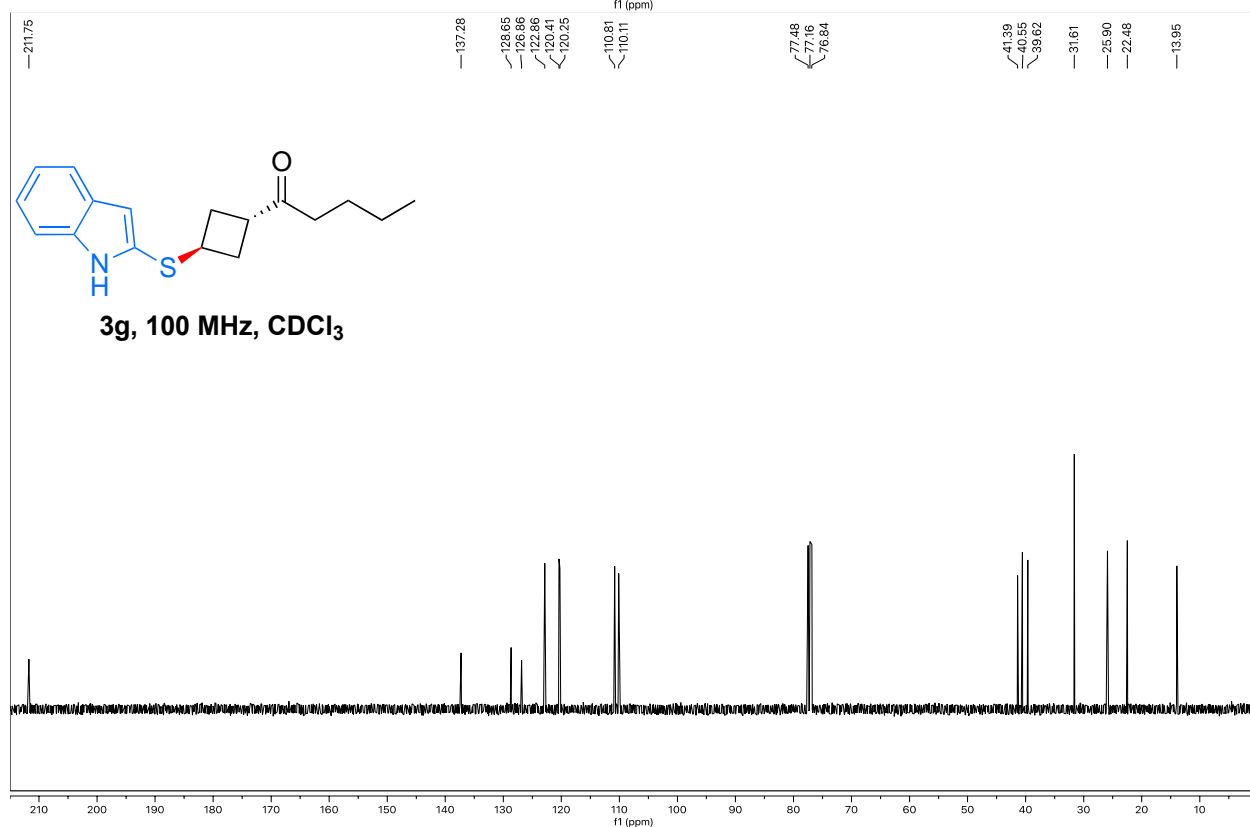

### Benzyl-3-((1*H*-indol-2-yl)thio)cyclobutane-1-carboxylate (3h)

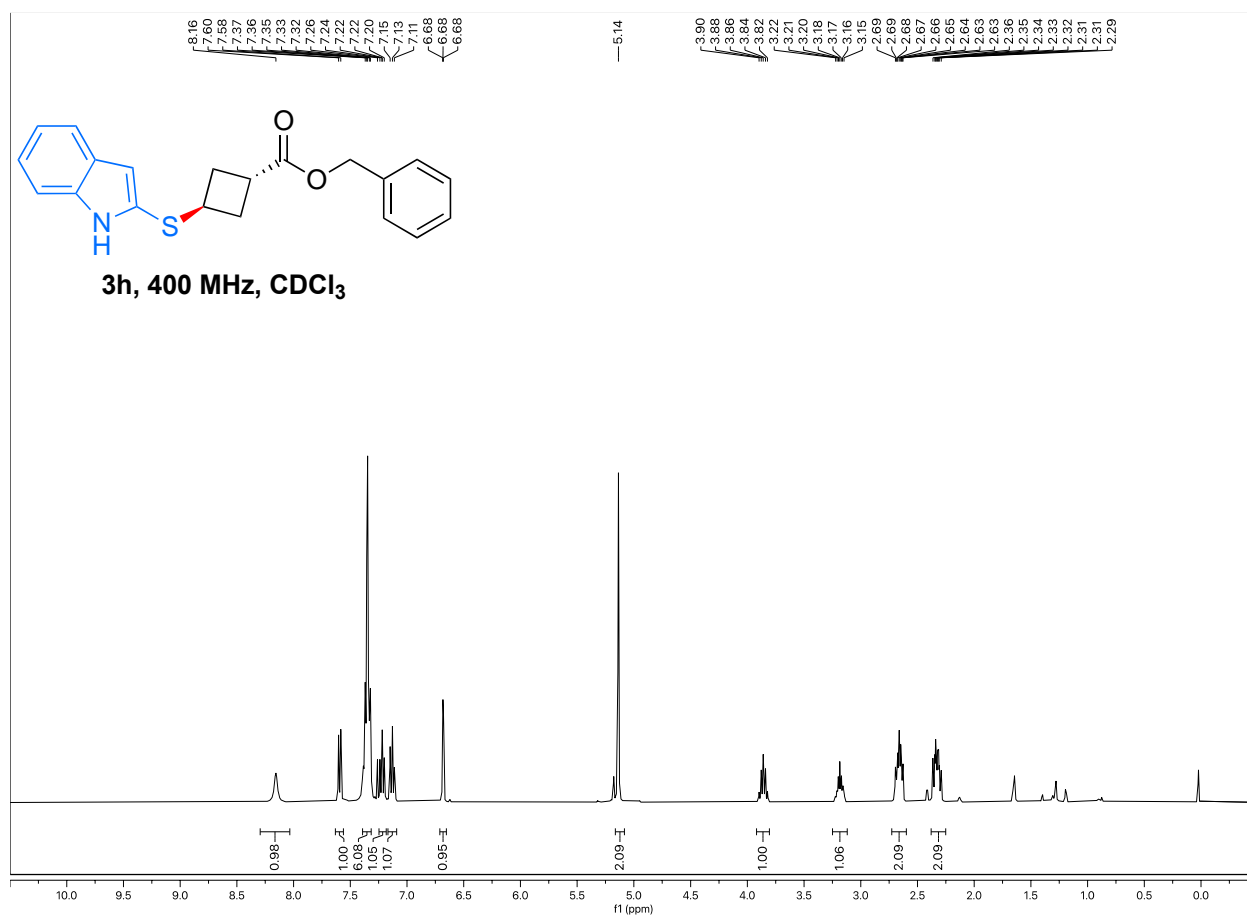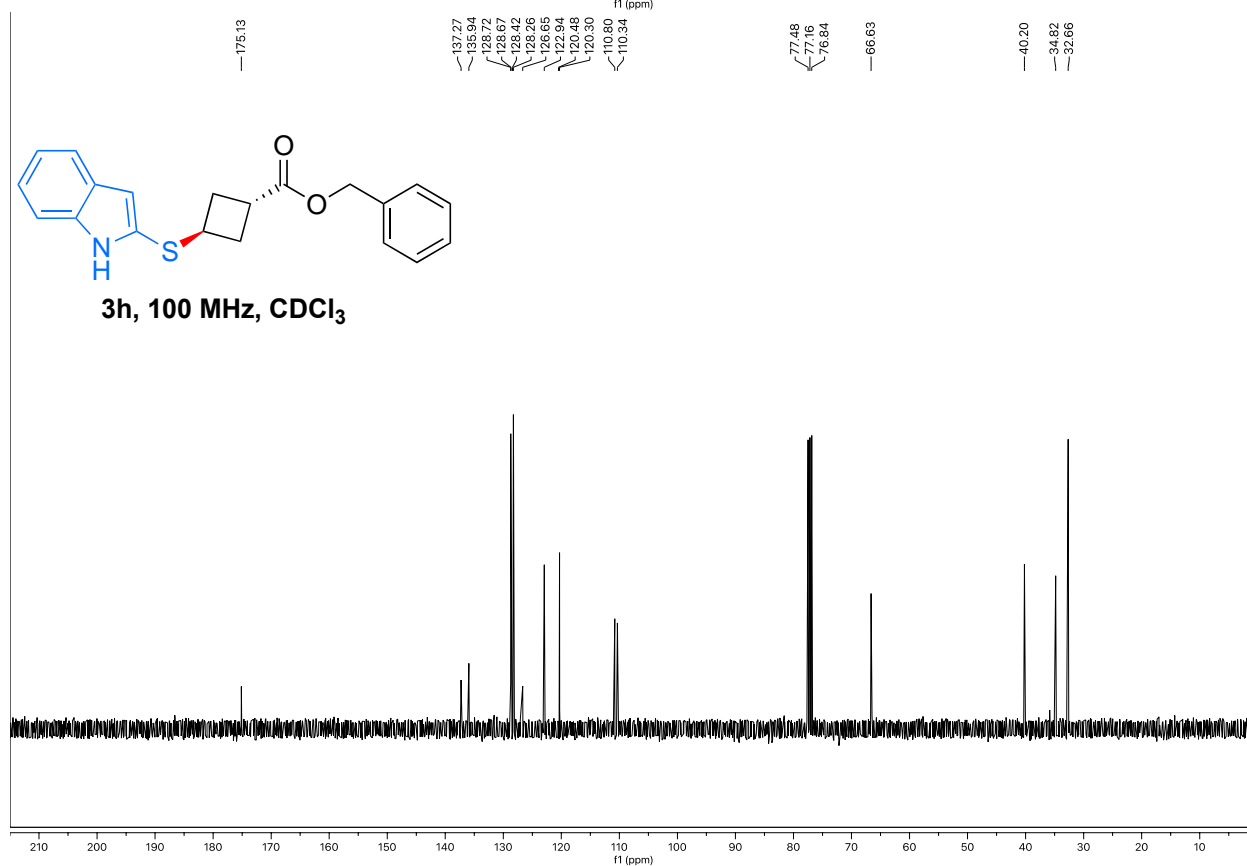



# Cinnamyl-3-((1*H*-indol-2-yl)thio)cyclobutane-1-carboxylate (**3i**)

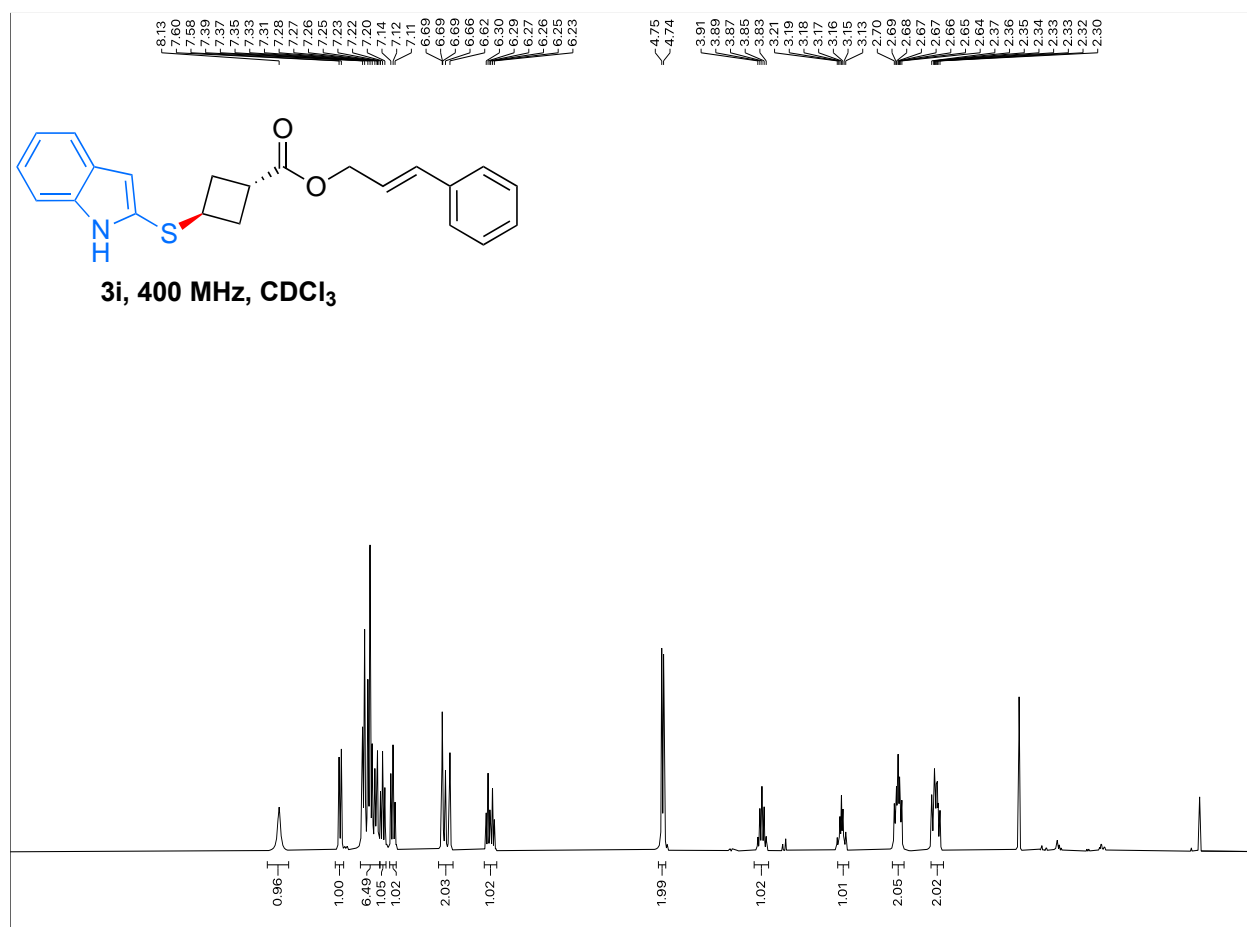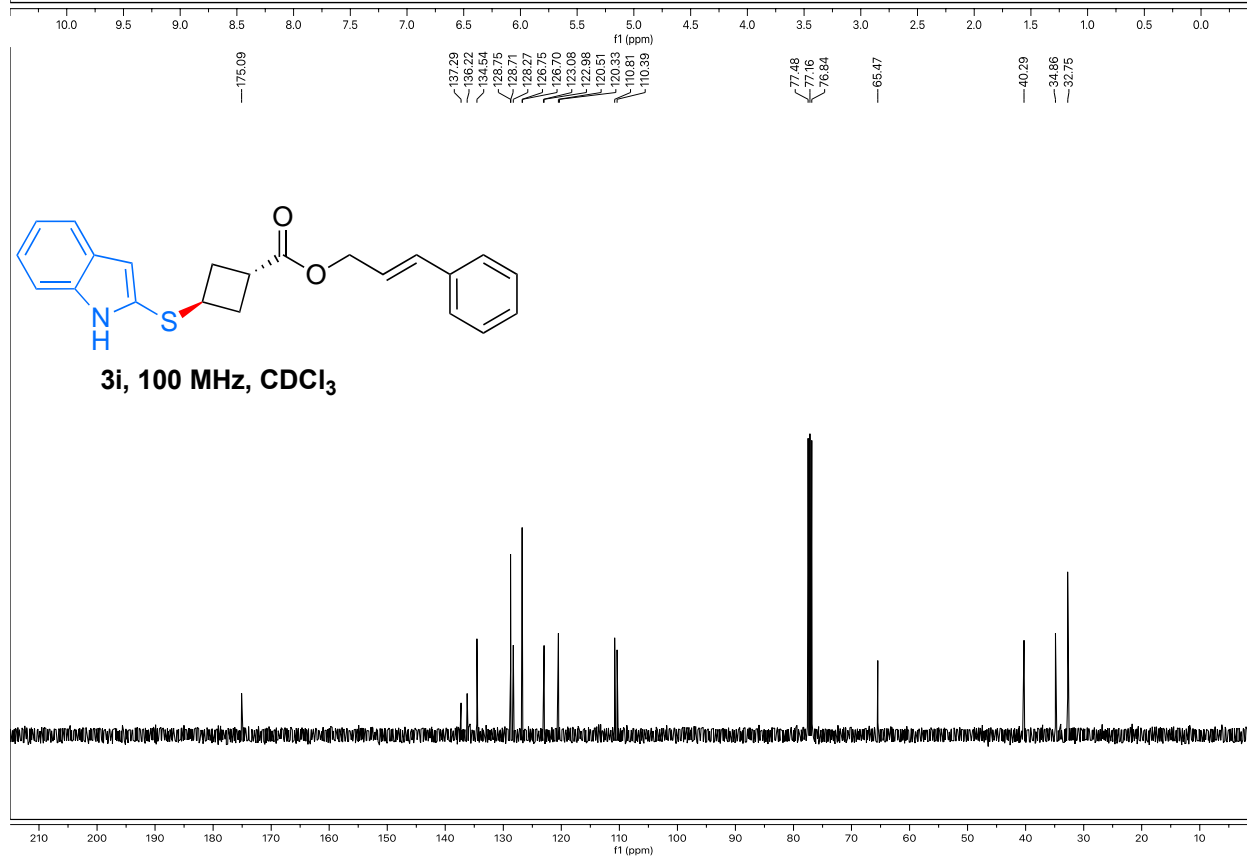

### Cyclohexyl-3-((1*H*-indol-2-yl)thio)cyclobutane-1-carboxylate (**3j**)

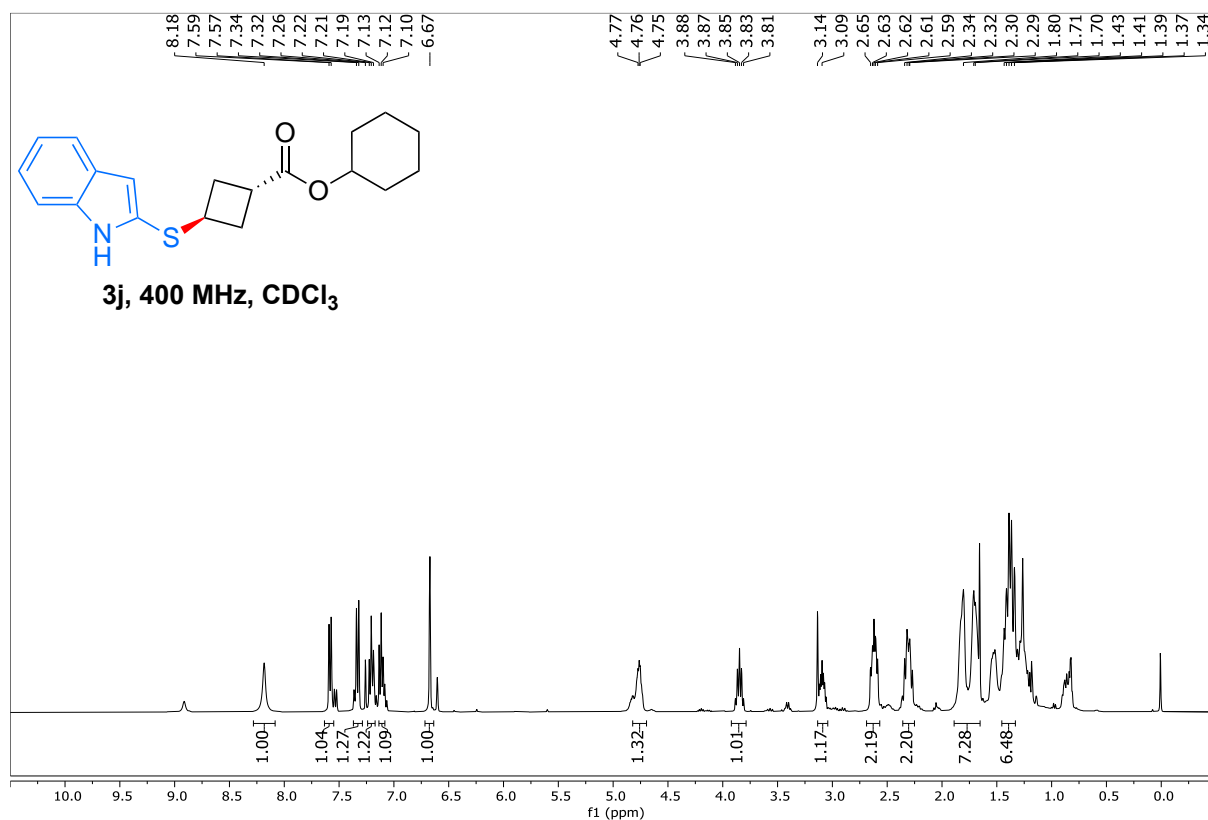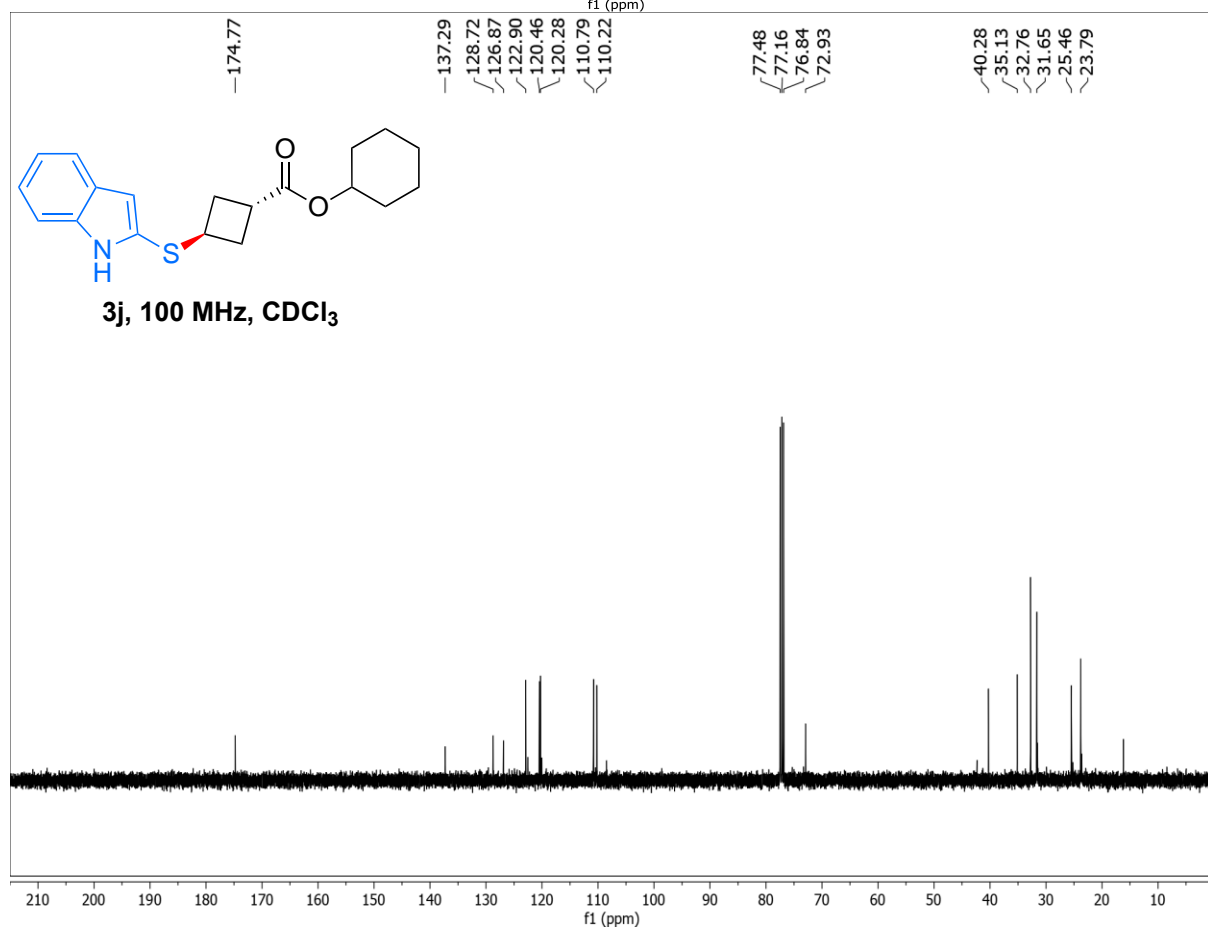

**(1*R*,2*S*,4*S*)-2-Isopropyl-4-methylcyclohexyl 3-((1*H*-indol-2-yl)thio)cyclobutane-1-carboxylate (3k)**

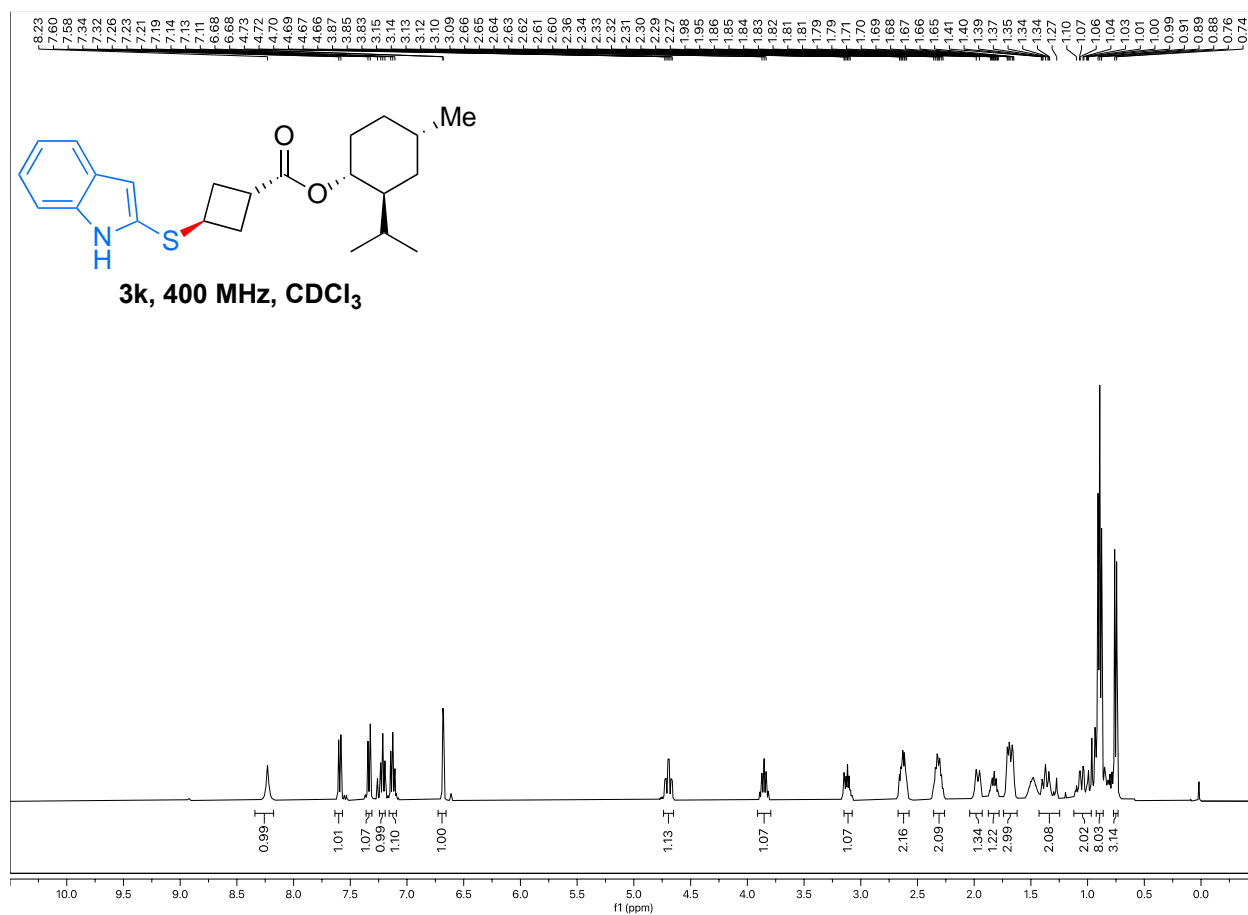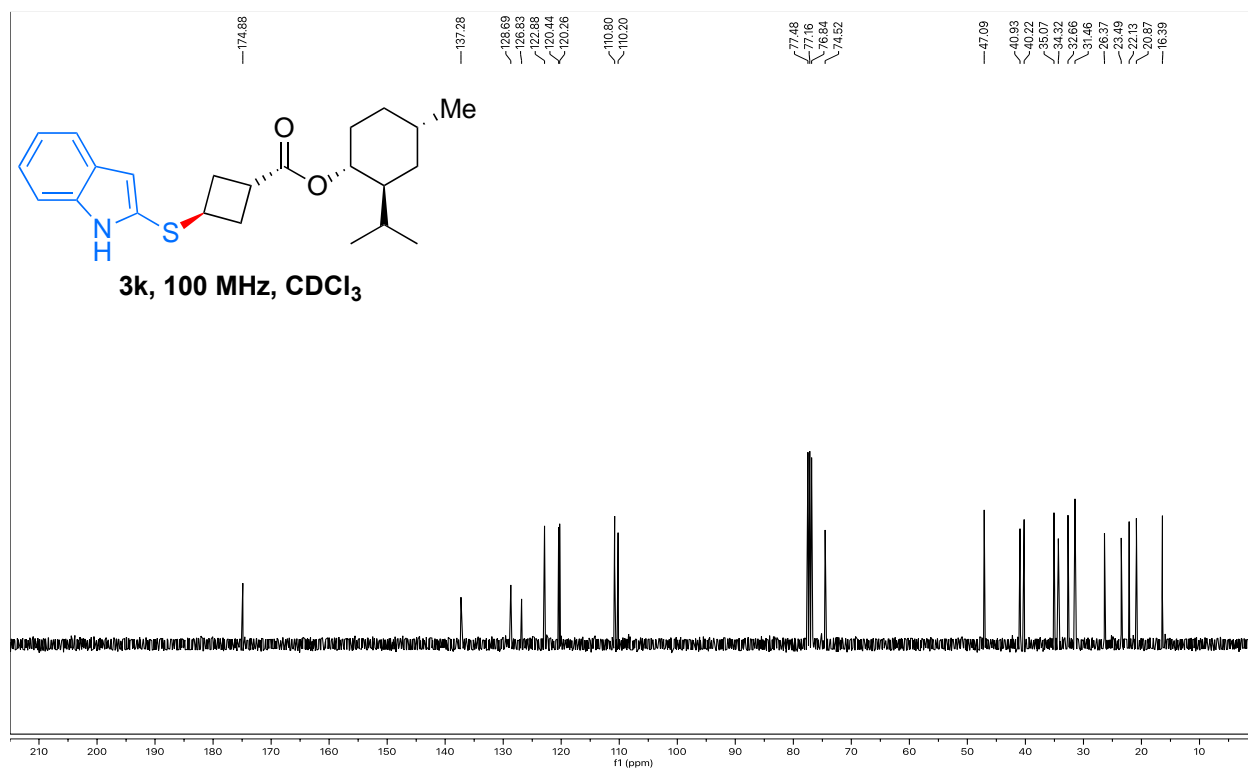

**(E)-3,7-Dimethylocta-2,6-dien-1-yl-3-((1*H*-indol-2-yl)thio)cyclobutane-1-carboxylate (3I)**

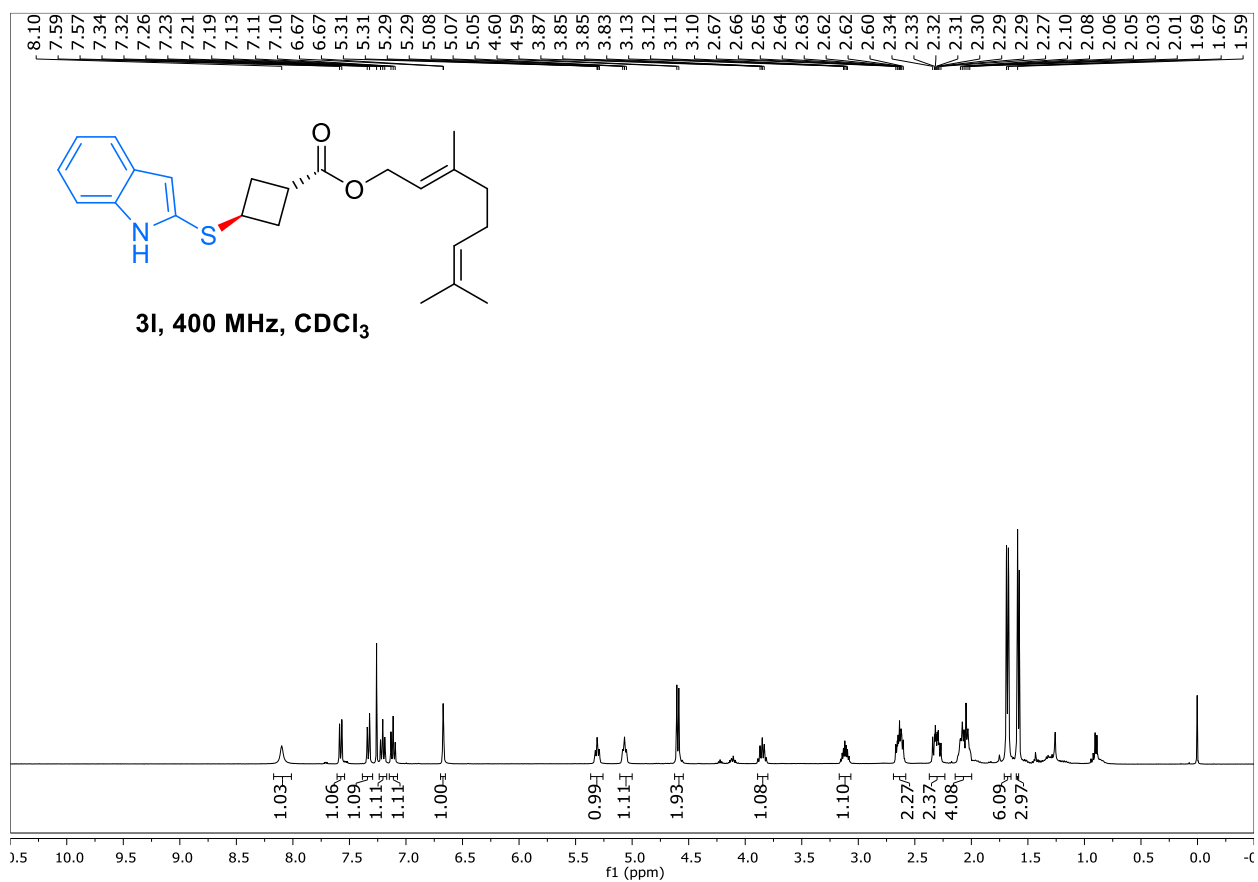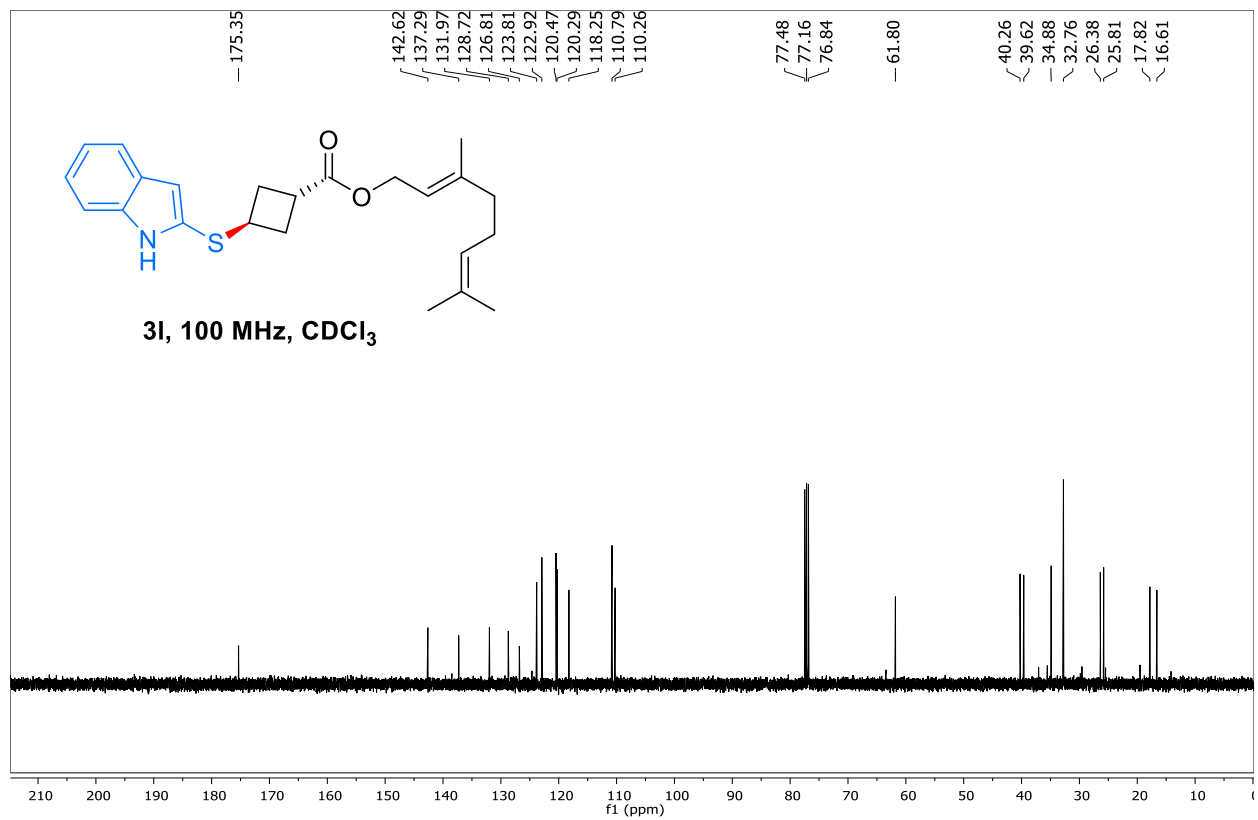

# Methyl 3-((1*H*-indol-2-yl)thio)-3-phenylcyclobutane-1-carboxylate (3m)

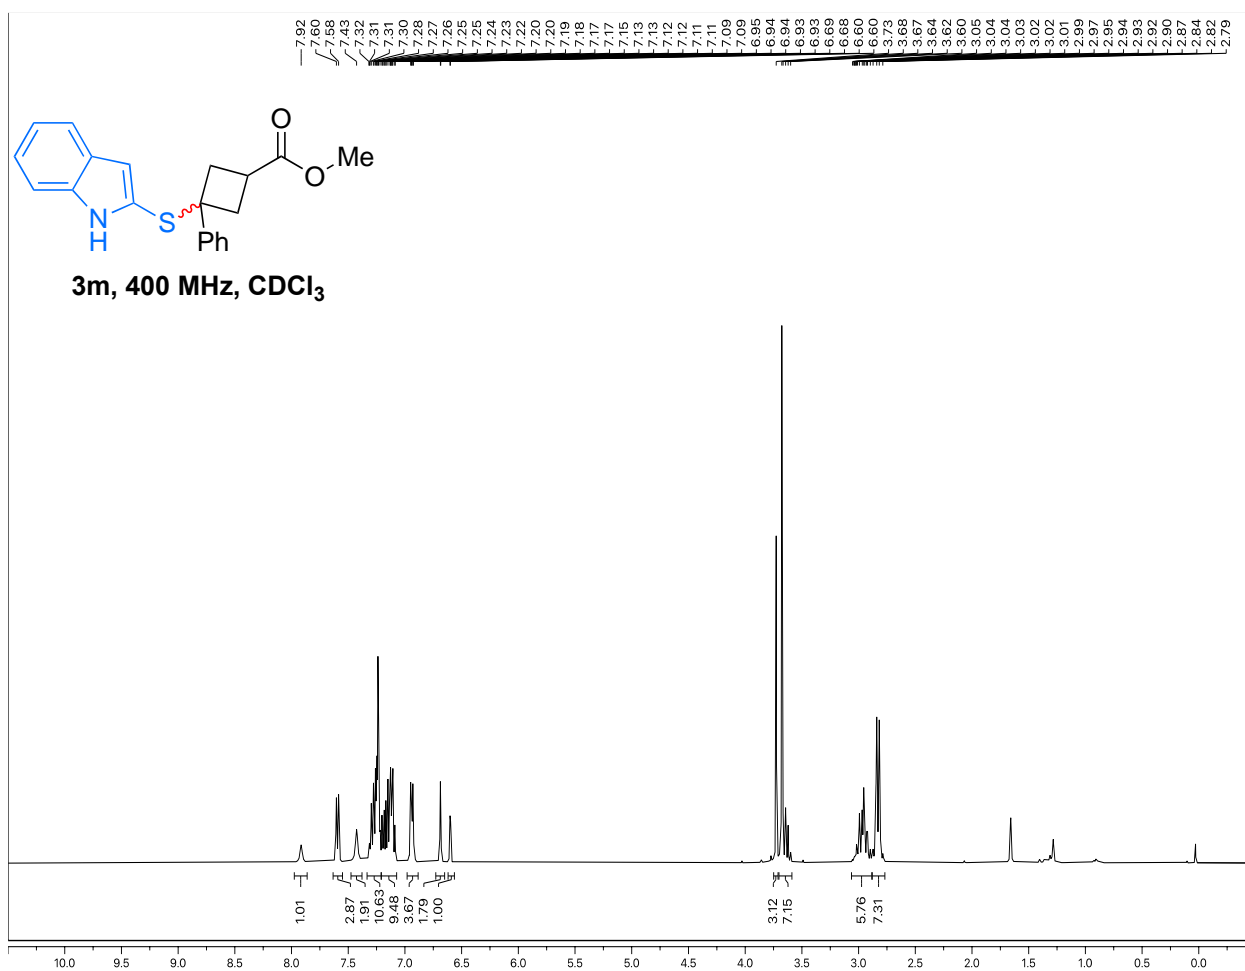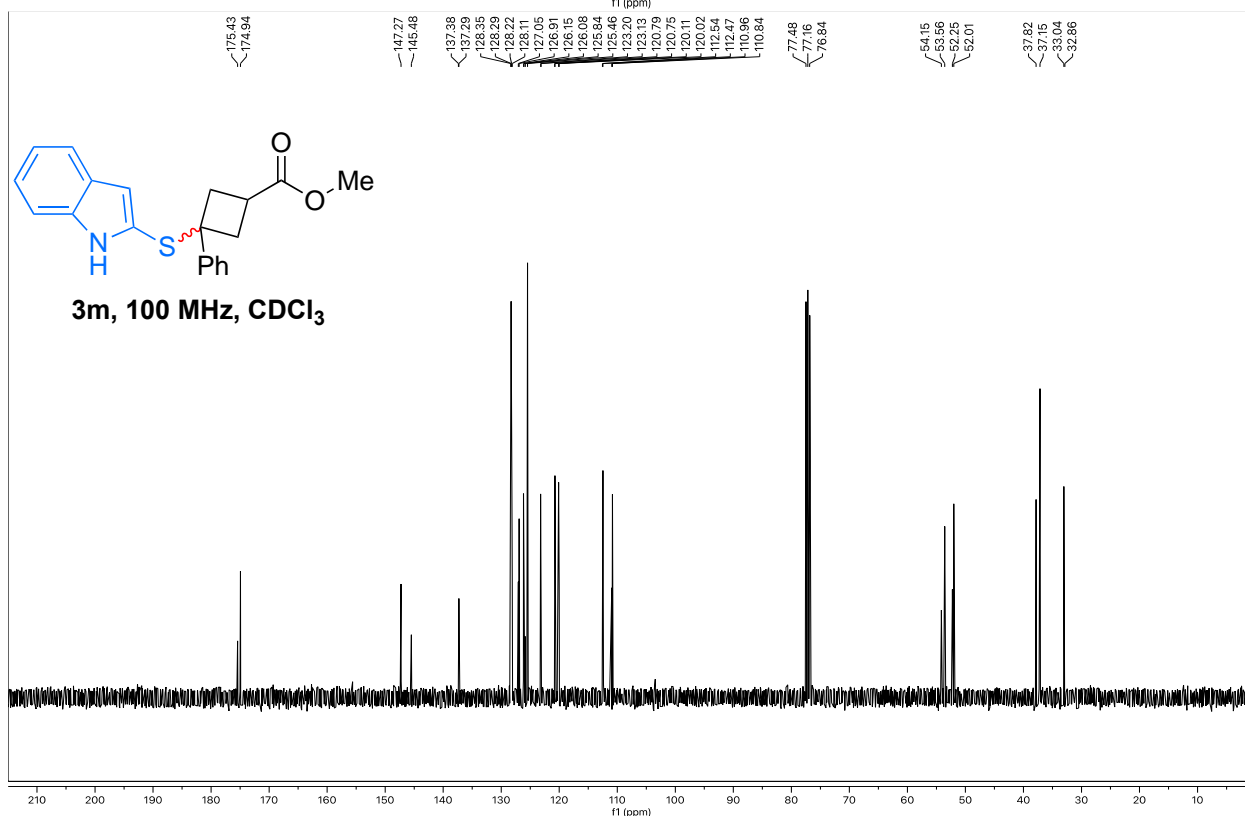

### (3-((1-Methyl-1*H*-indol-2-yl)thio)cyclobutyl)(naphthalen-2-yl)methanone (3n)

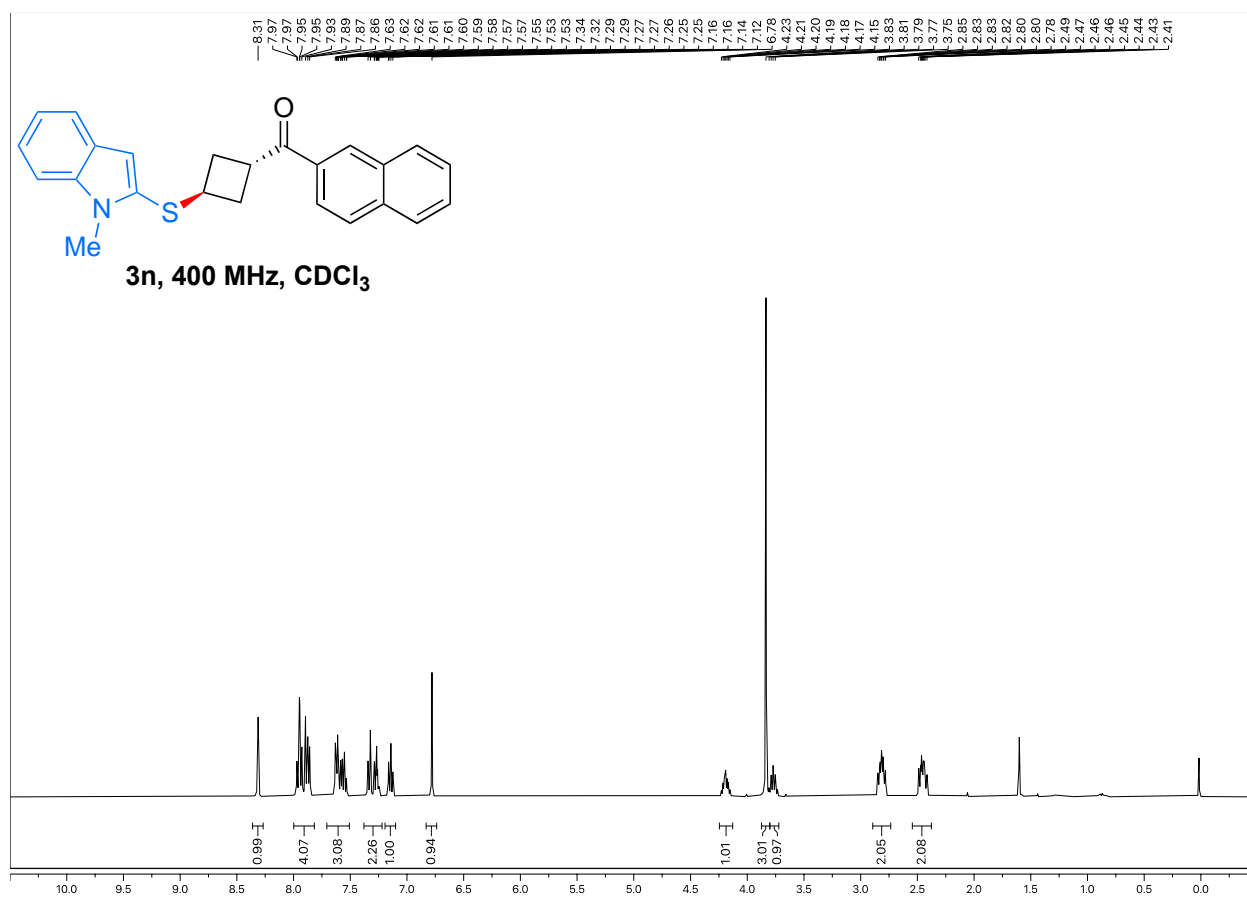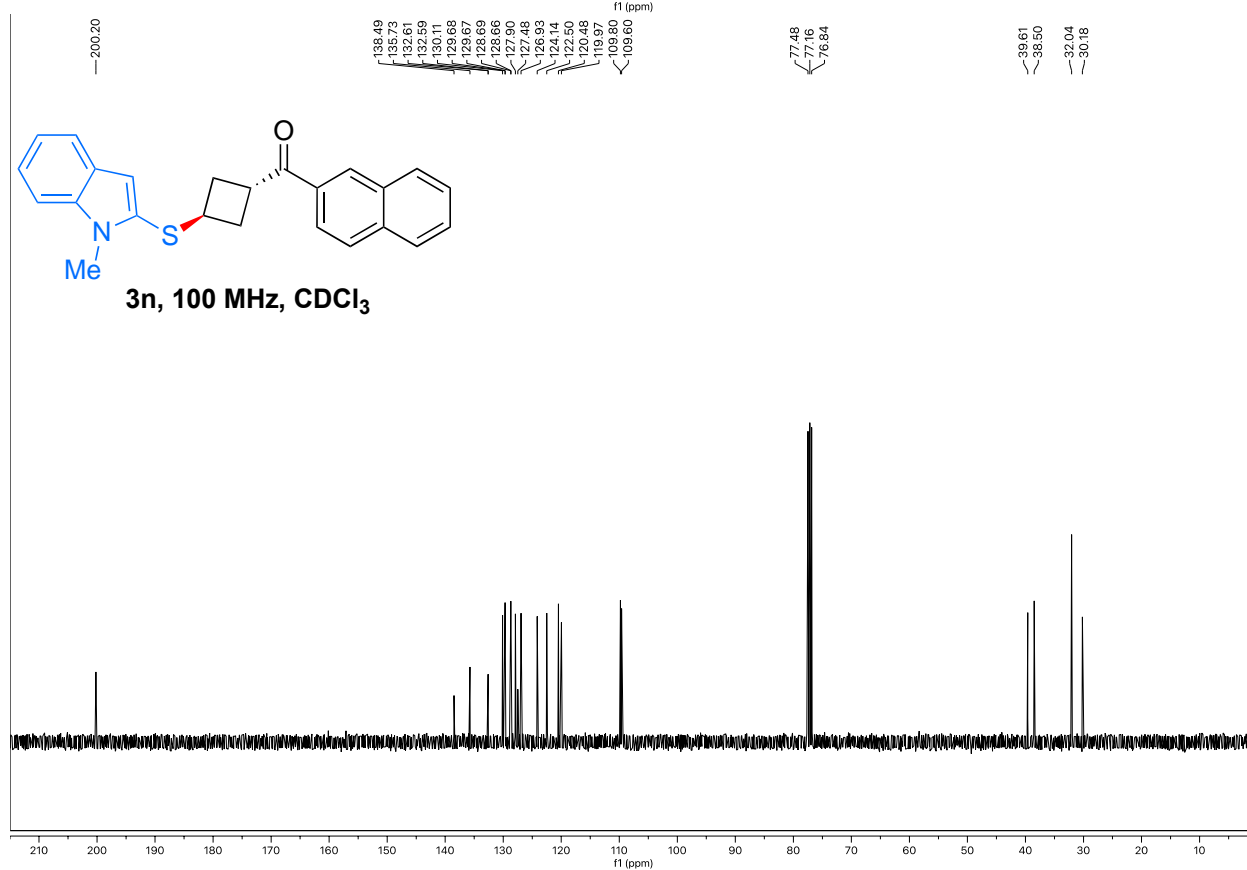

**Naphthalen-2-yl(3-((1-phenyl-1*H*-indol-2-yl)thio)cyclobutyl)methanone (3o)**

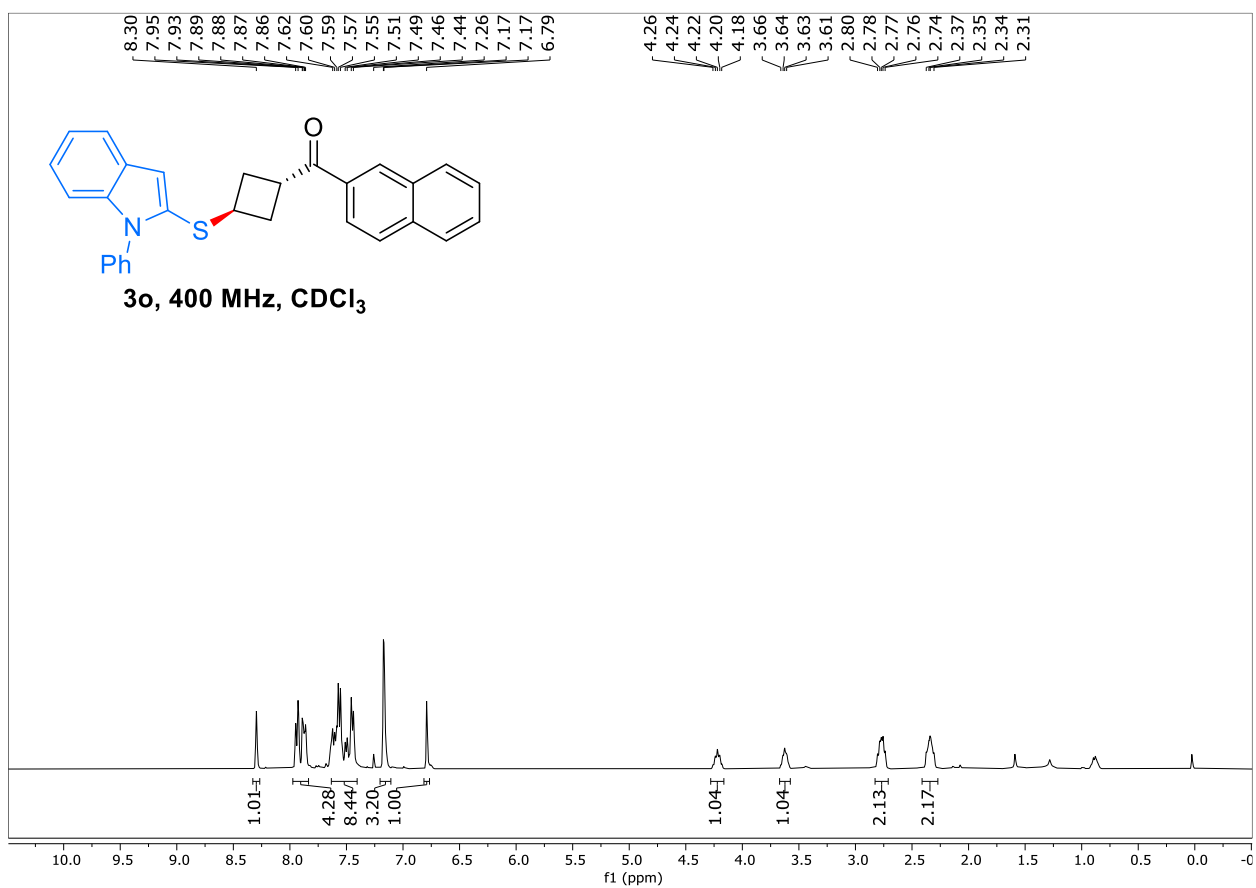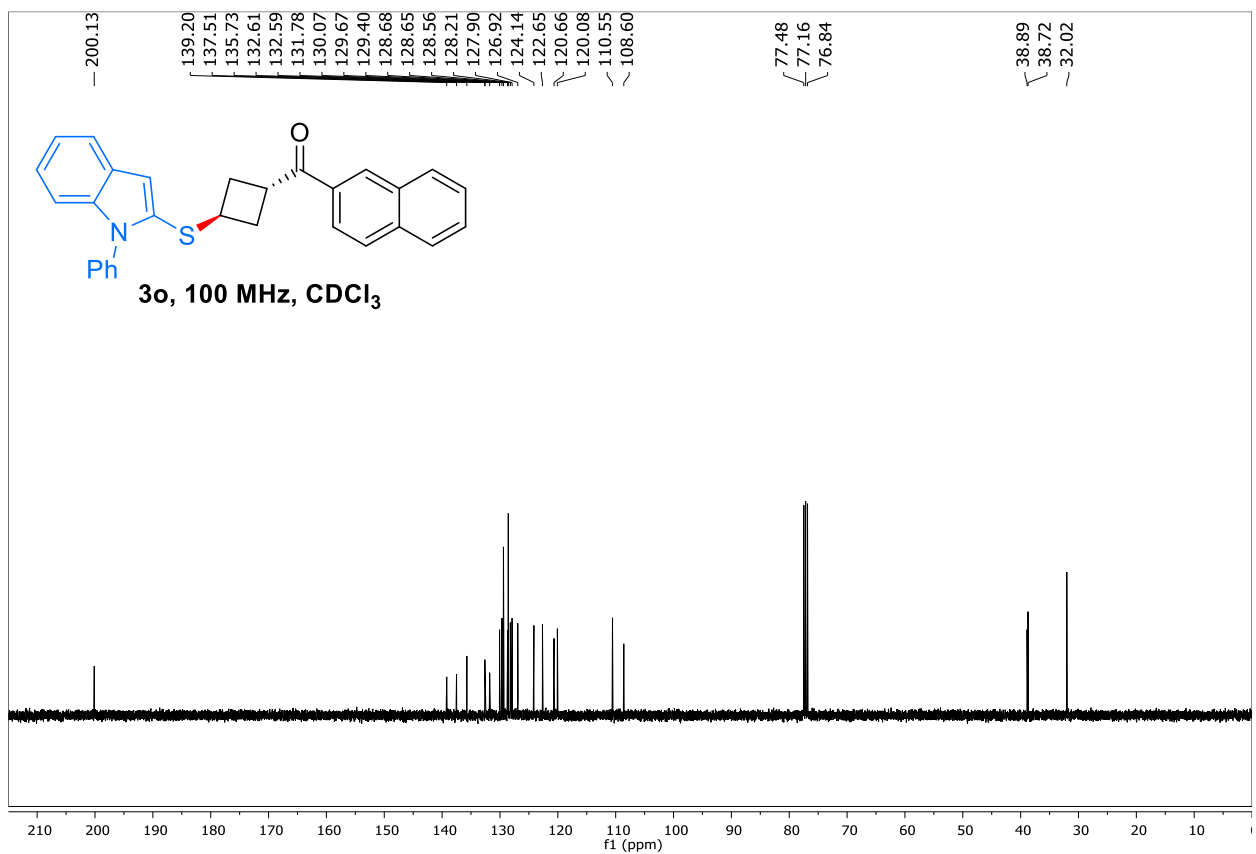

**(3-((3-Methyl-1*H*-indol-2-yl)thio)cyclobutyl)(naphthalen-2-yl)methanone (3p)**

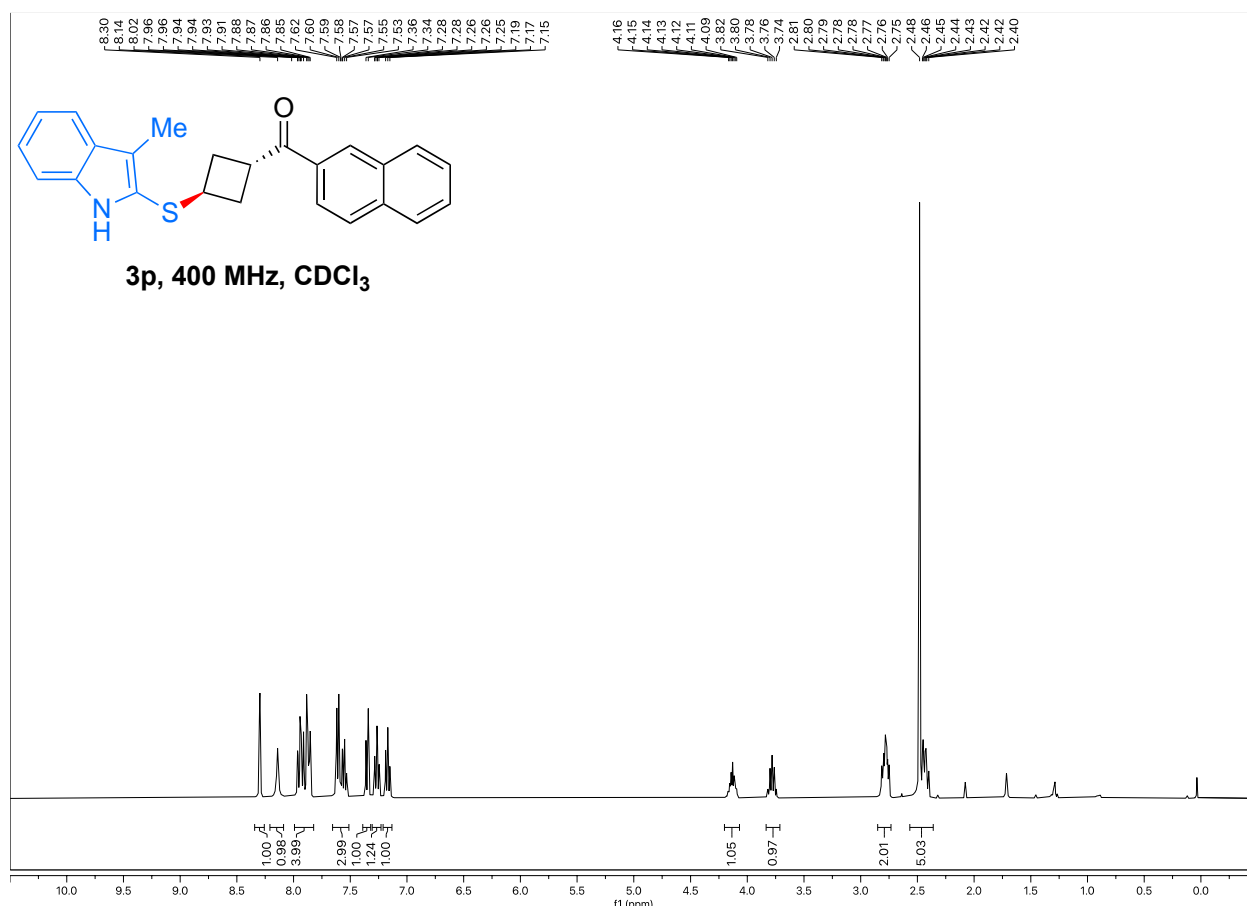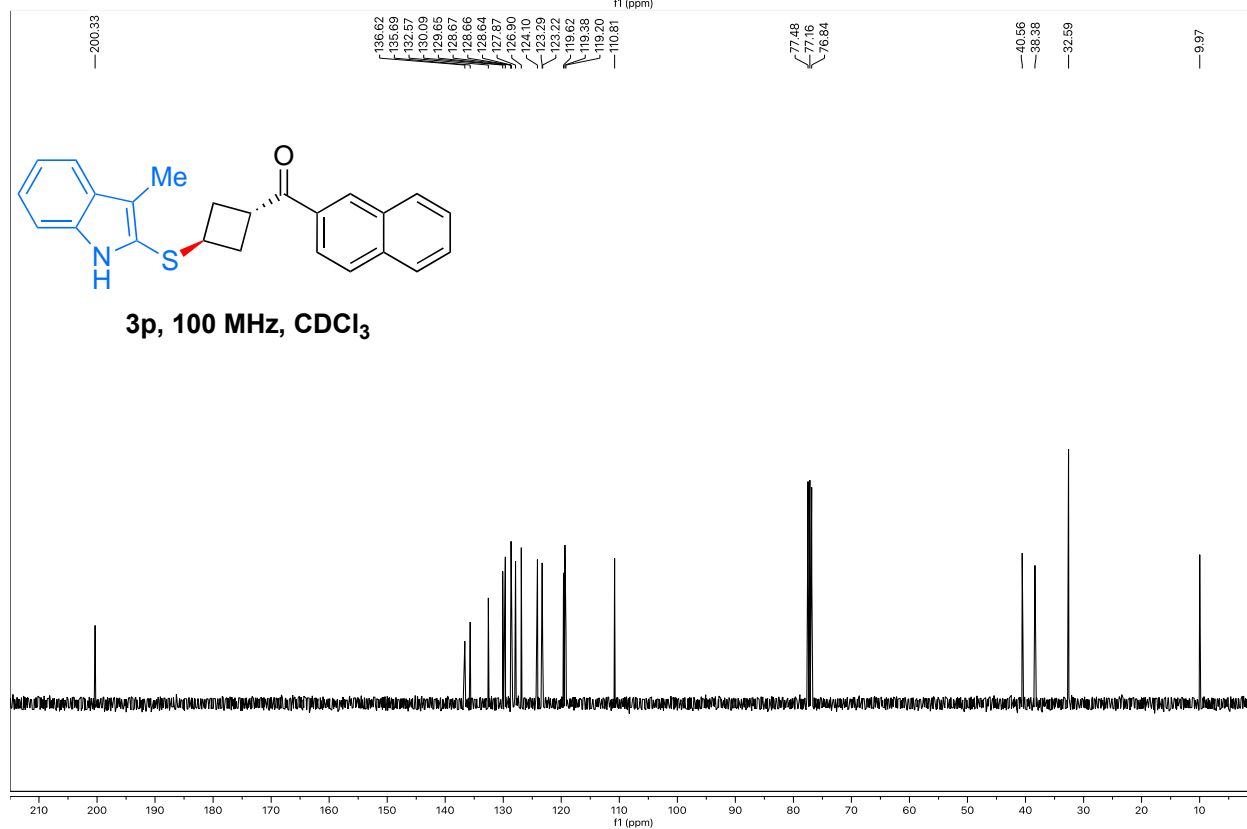



**3-((3-Benzyl-1H-indol-2-yl)thio)cyclobutyl)(naphthalen-2-yl)methanone (3q)**

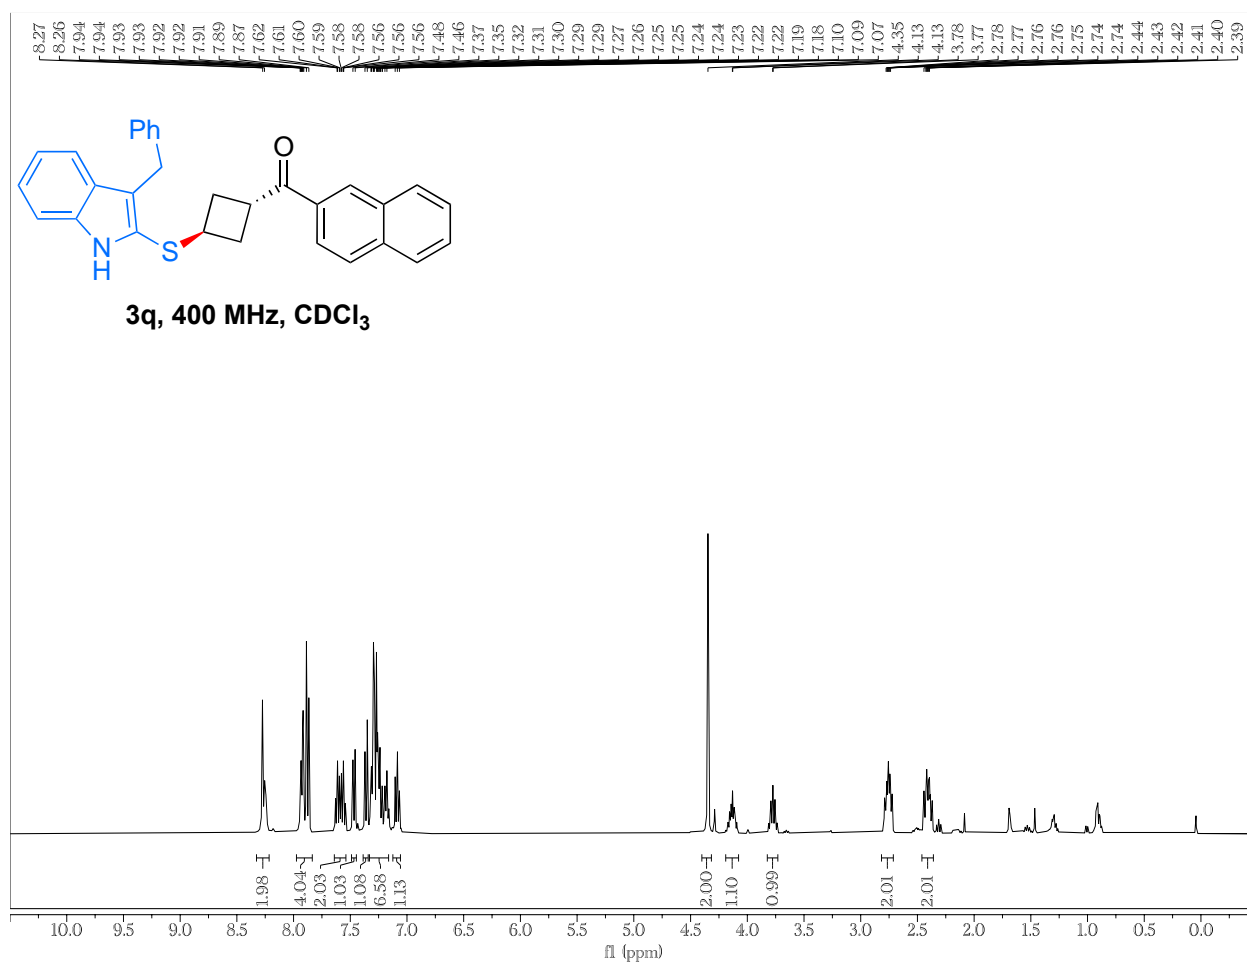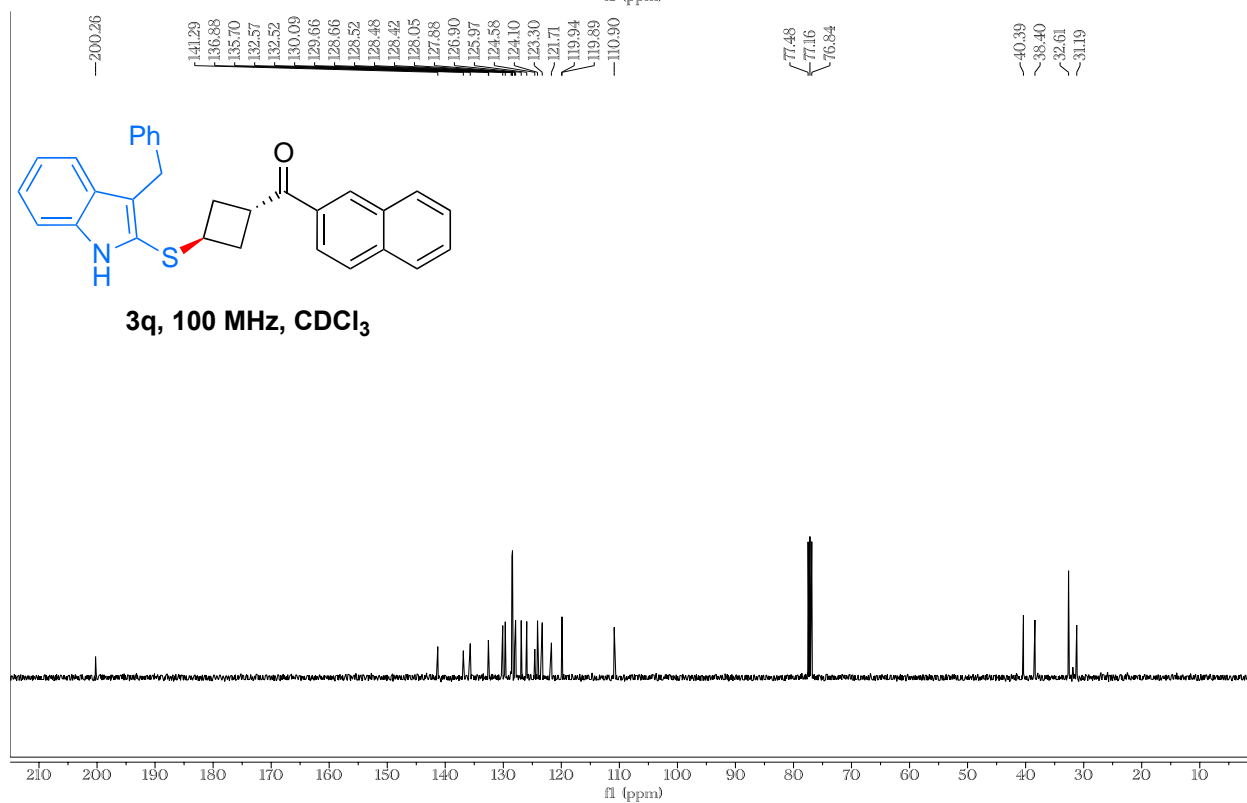

**(3-((4-Chloro-1*H*-indol-2-yl)thio)cyclobutyl)(naphthalen-2-yl)methanone (3r)**

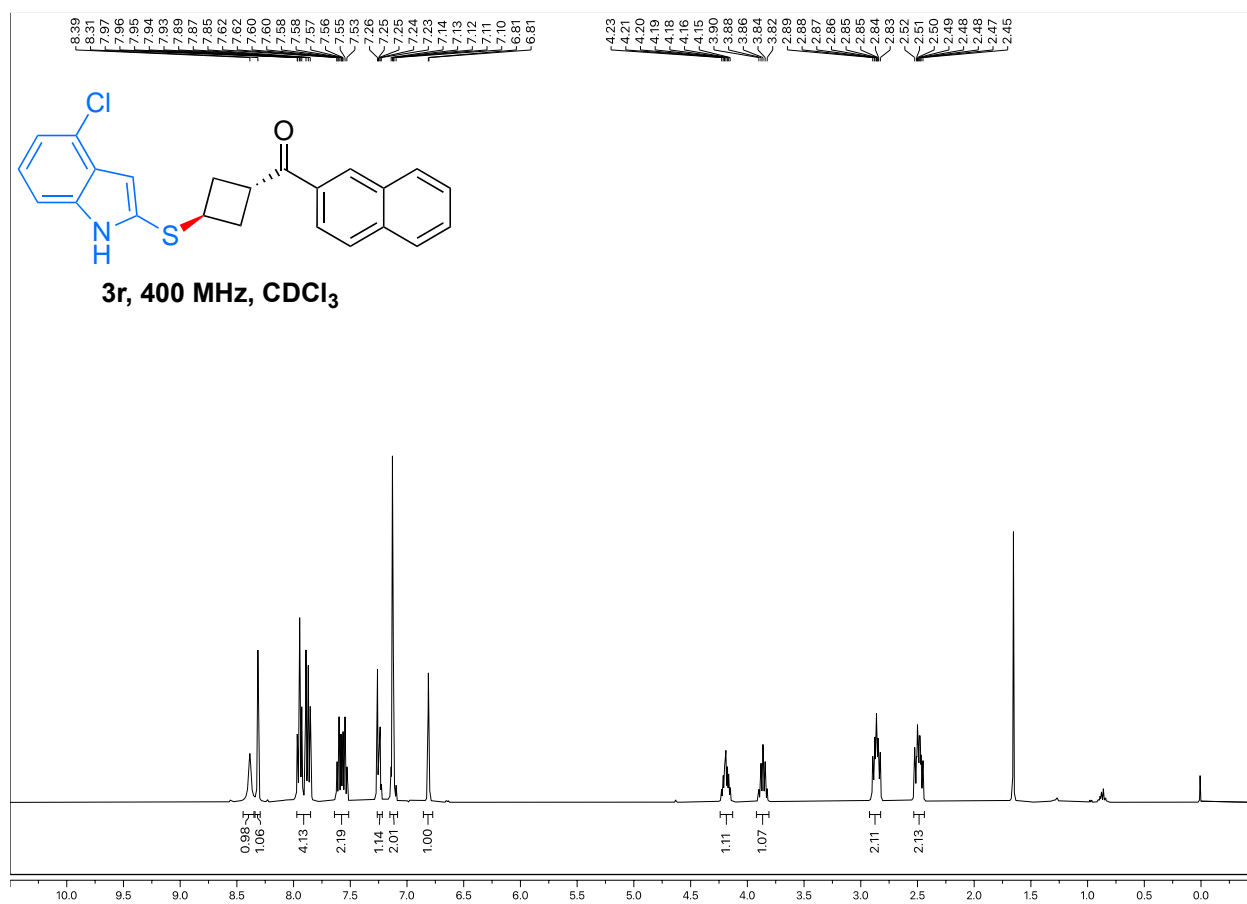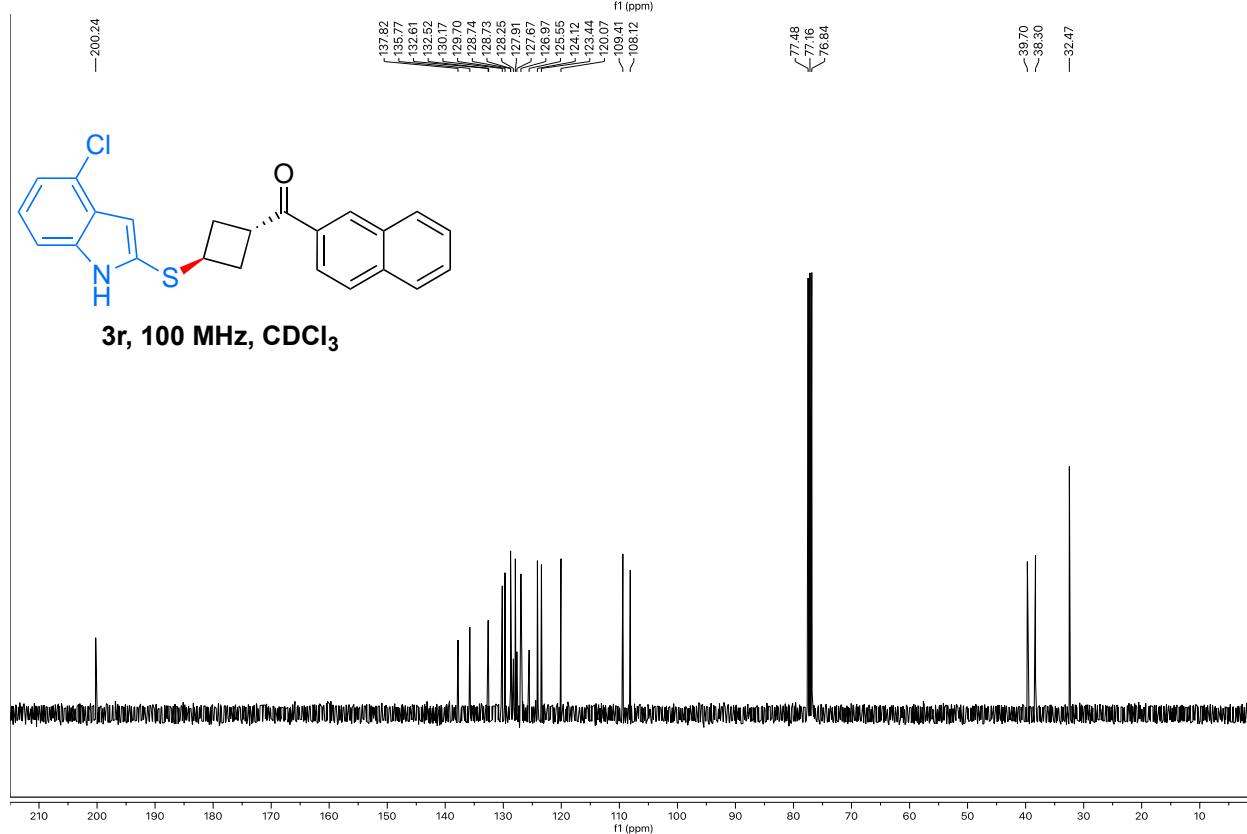



### 3-((5-Bromo-1*H*-indol-2-yl)thio)cyclobutyl(naphthalen-2-yl)methanone (3t)

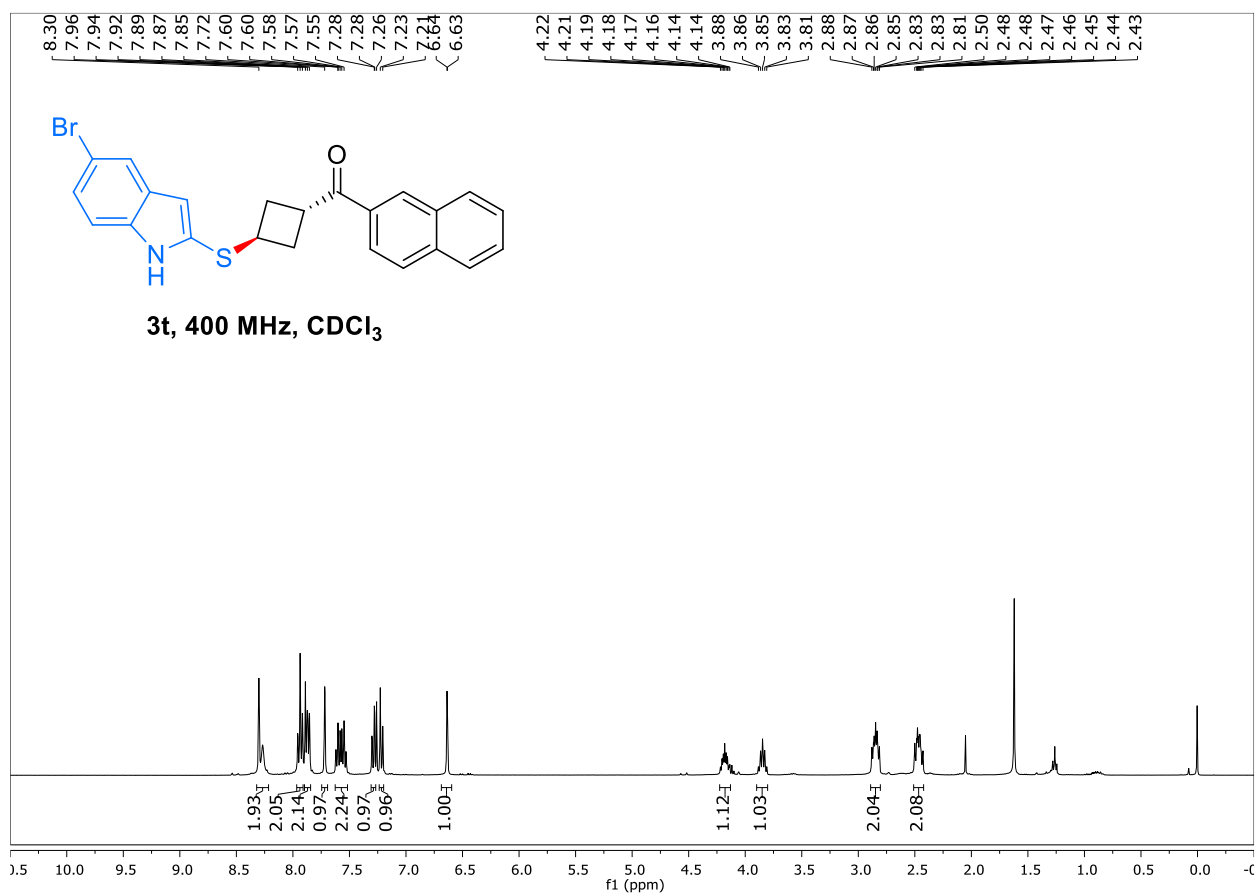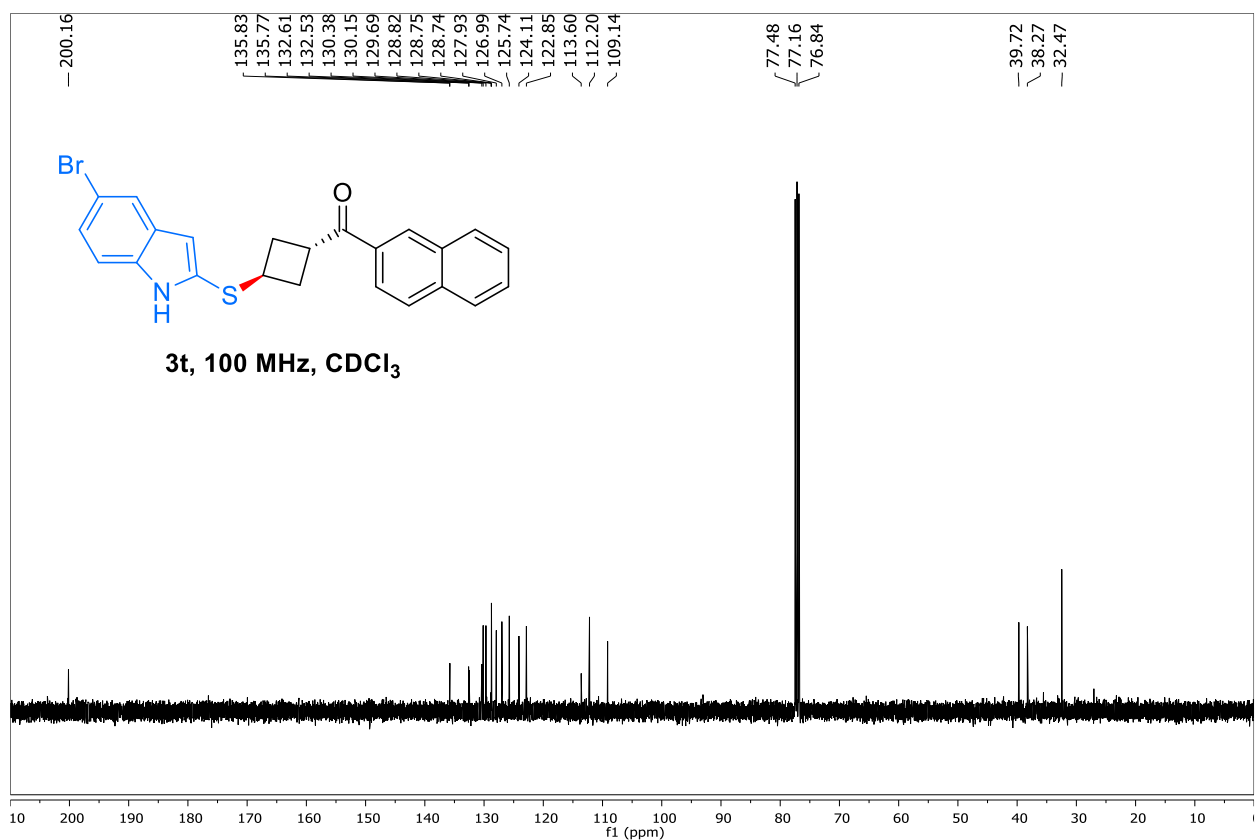

### 3-((5-Methoxy-1*H*-indol-2-yl)thio)cyclobutyl)(naphthalen-2-yl)methanone (3u)

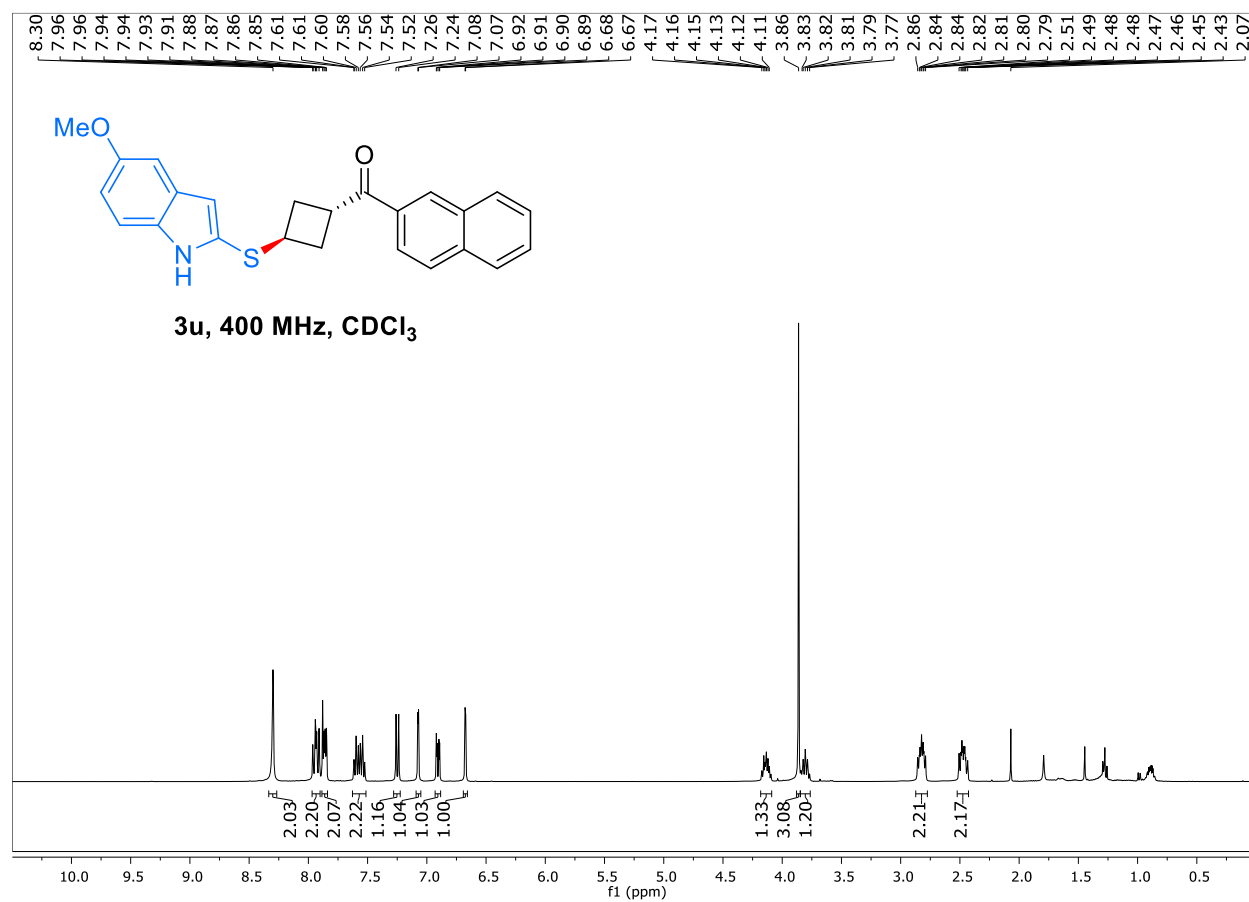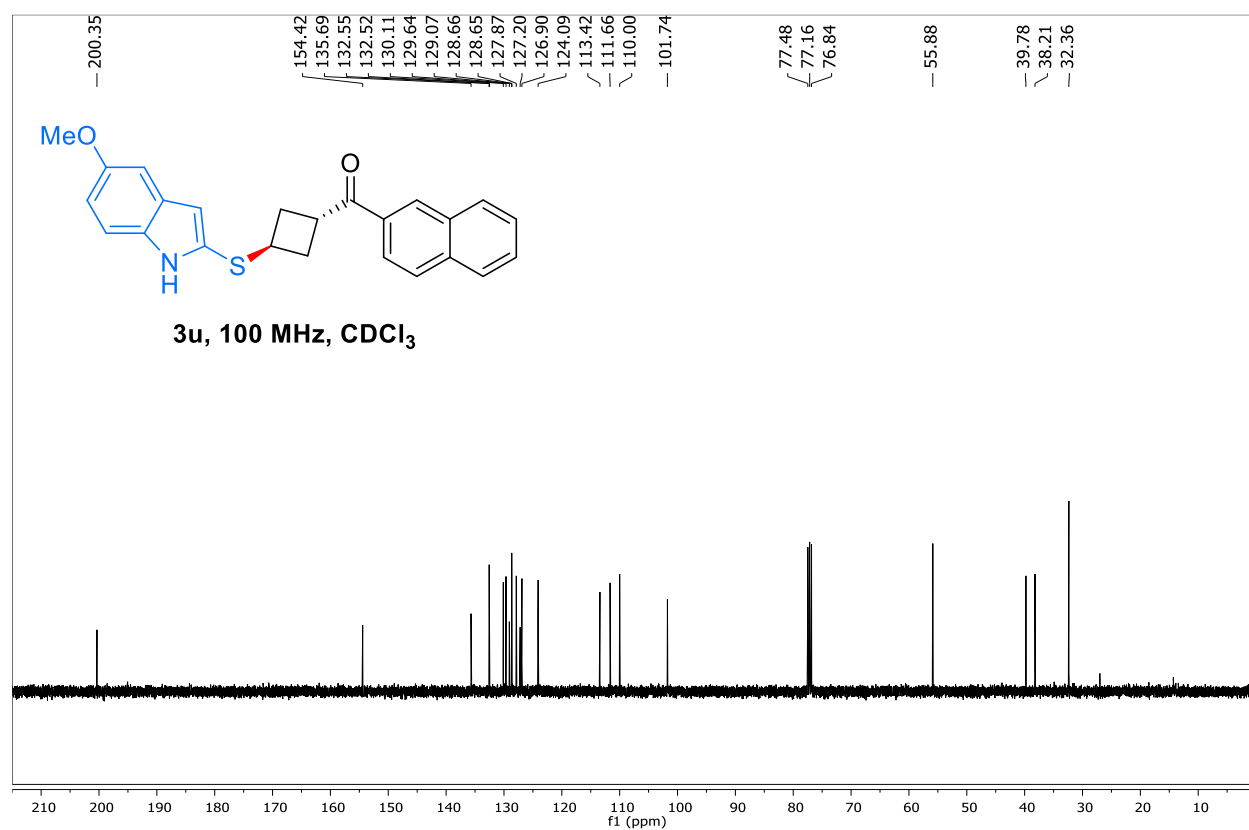

**(3-((6-Bromo-1*H*-indol-2-yl)thio)cyclobutyl)(naphthalen-2-yl)methanone (3v)**

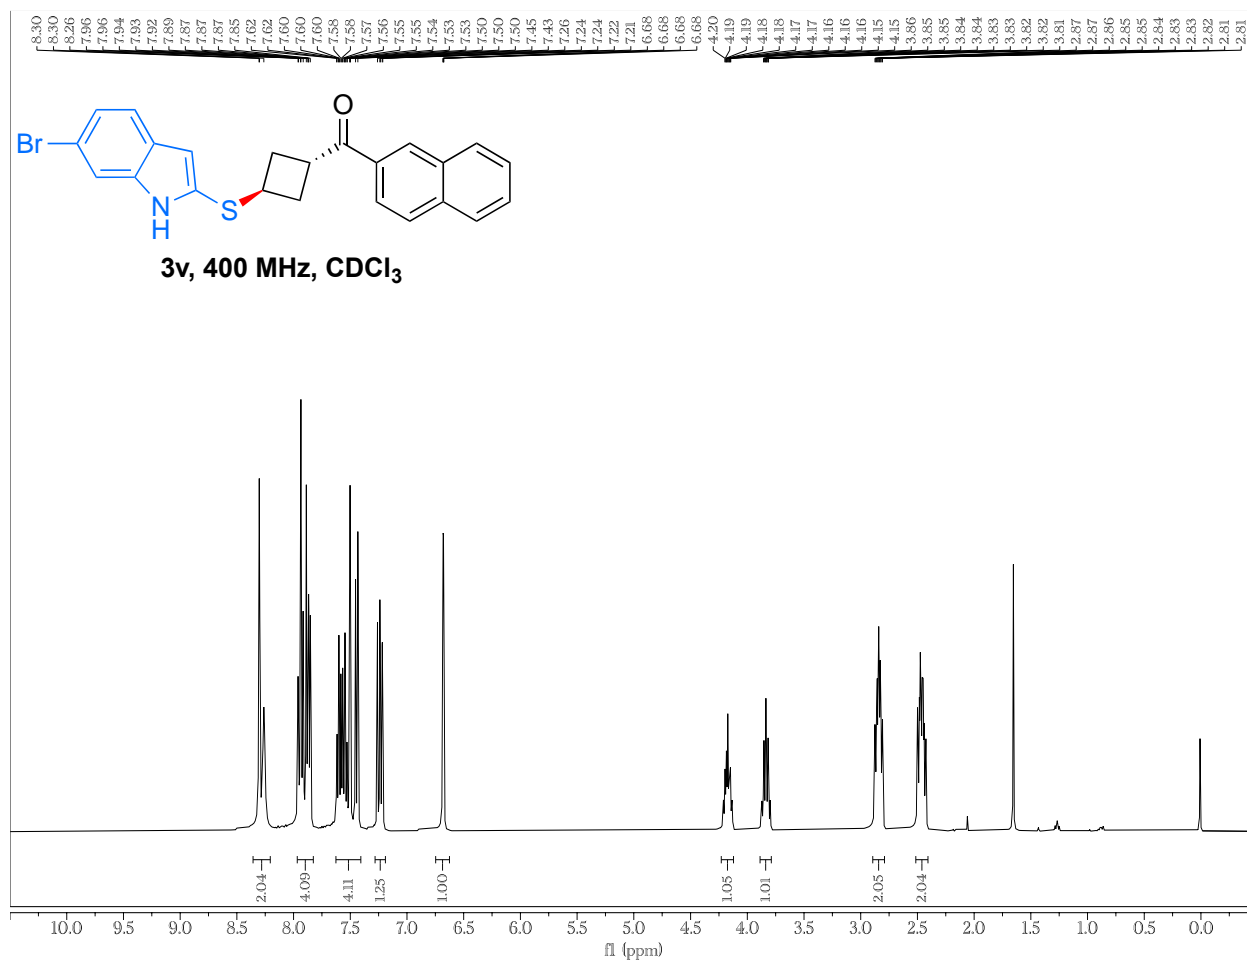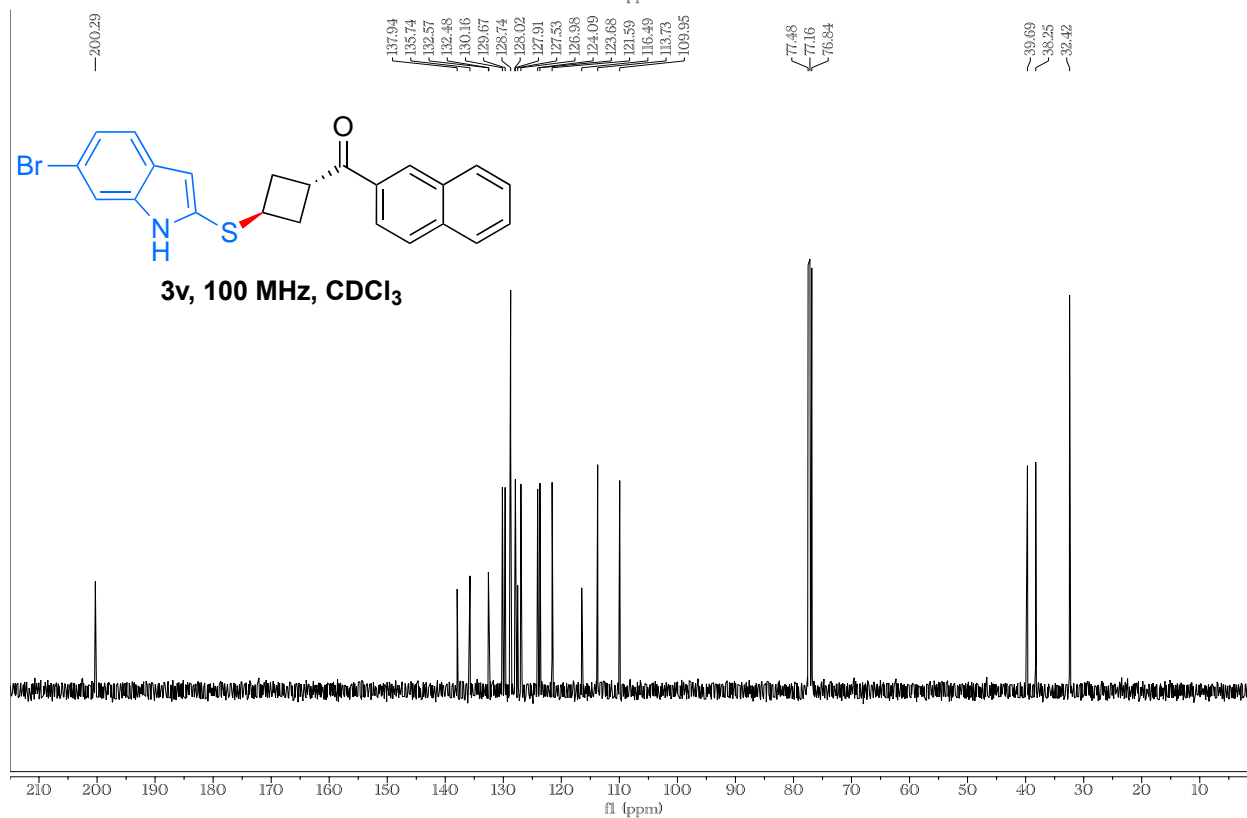

**3-((6-Methoxy-1*H*-indol-2-yl)thio)cyclobutyl)(naphthalen-2-yl)methanone (3w)**

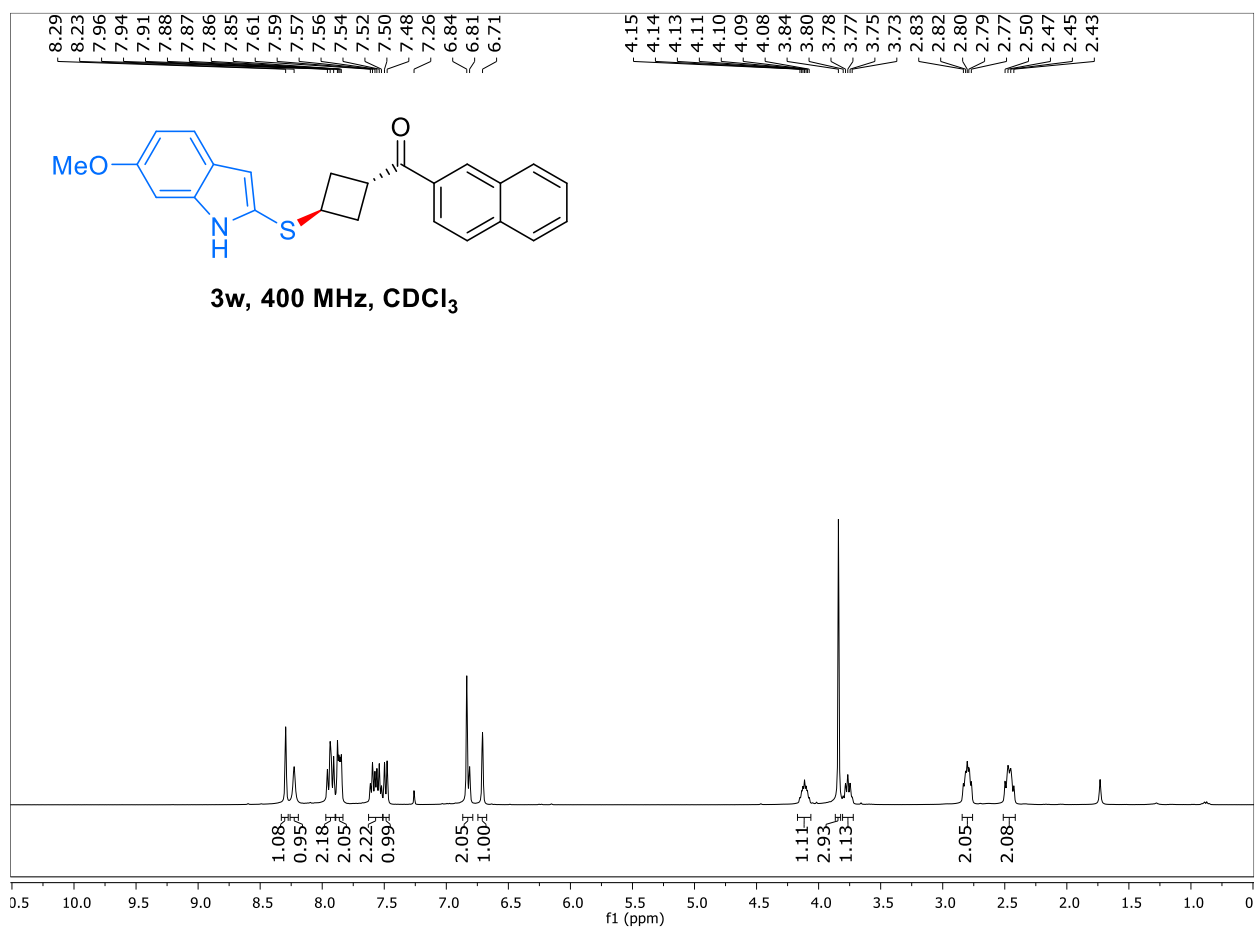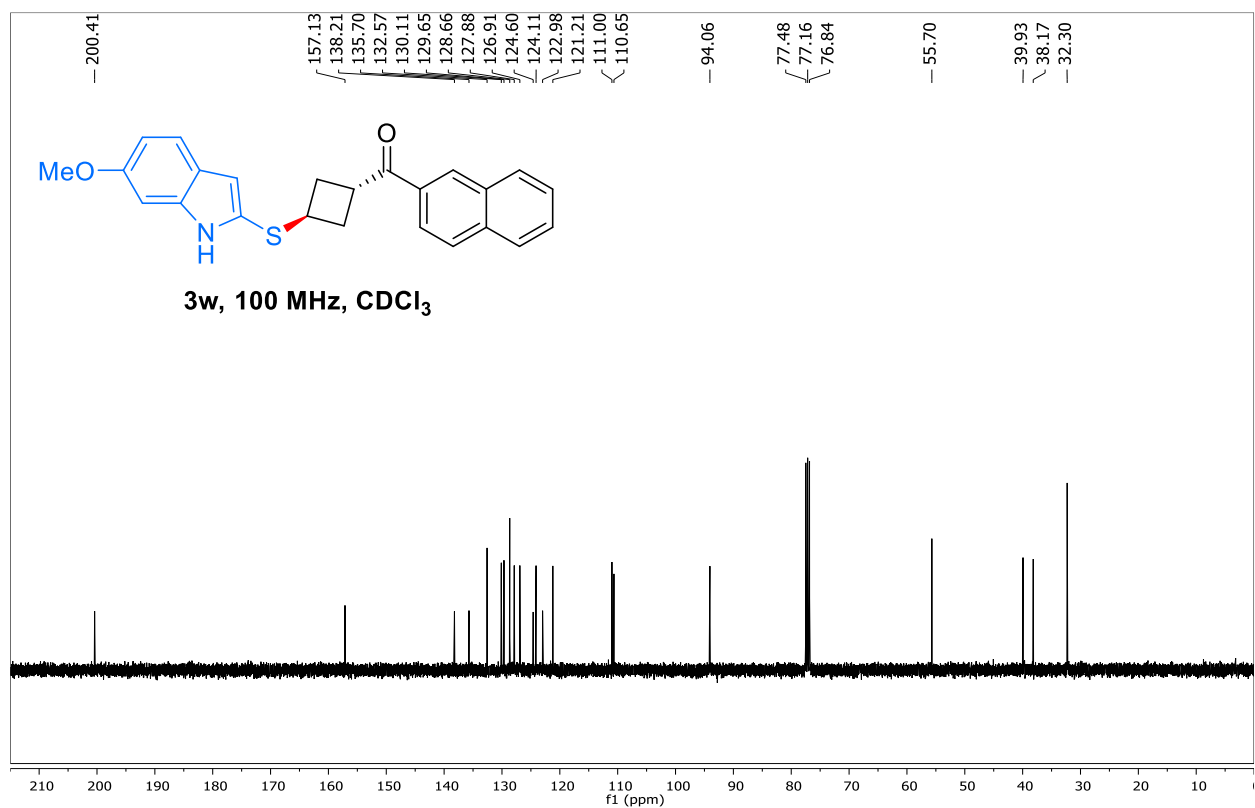

### Naphthalen-2-yl(3-((6-phenyl-1H-indol-2-yl)thio)cyclobutyl)methanone (3x)

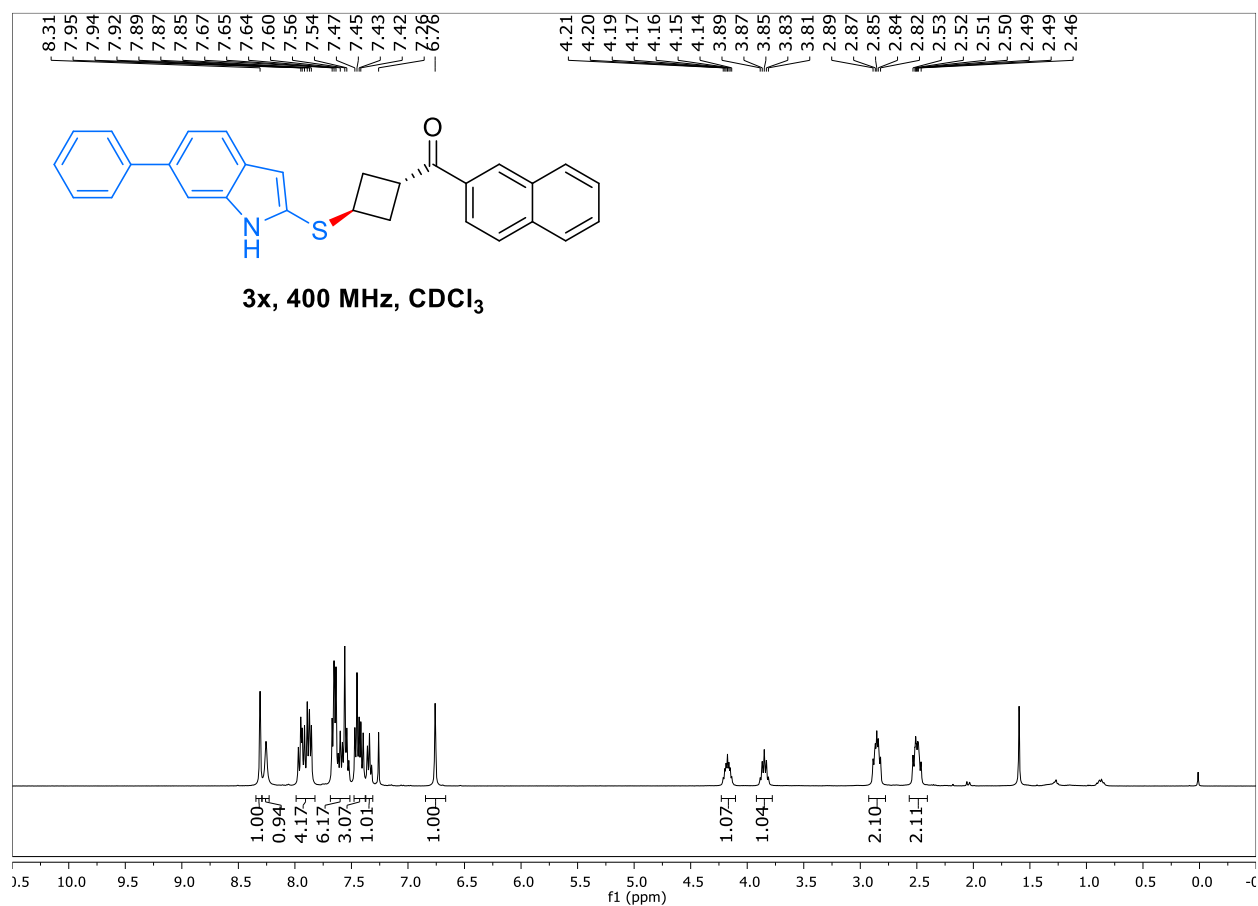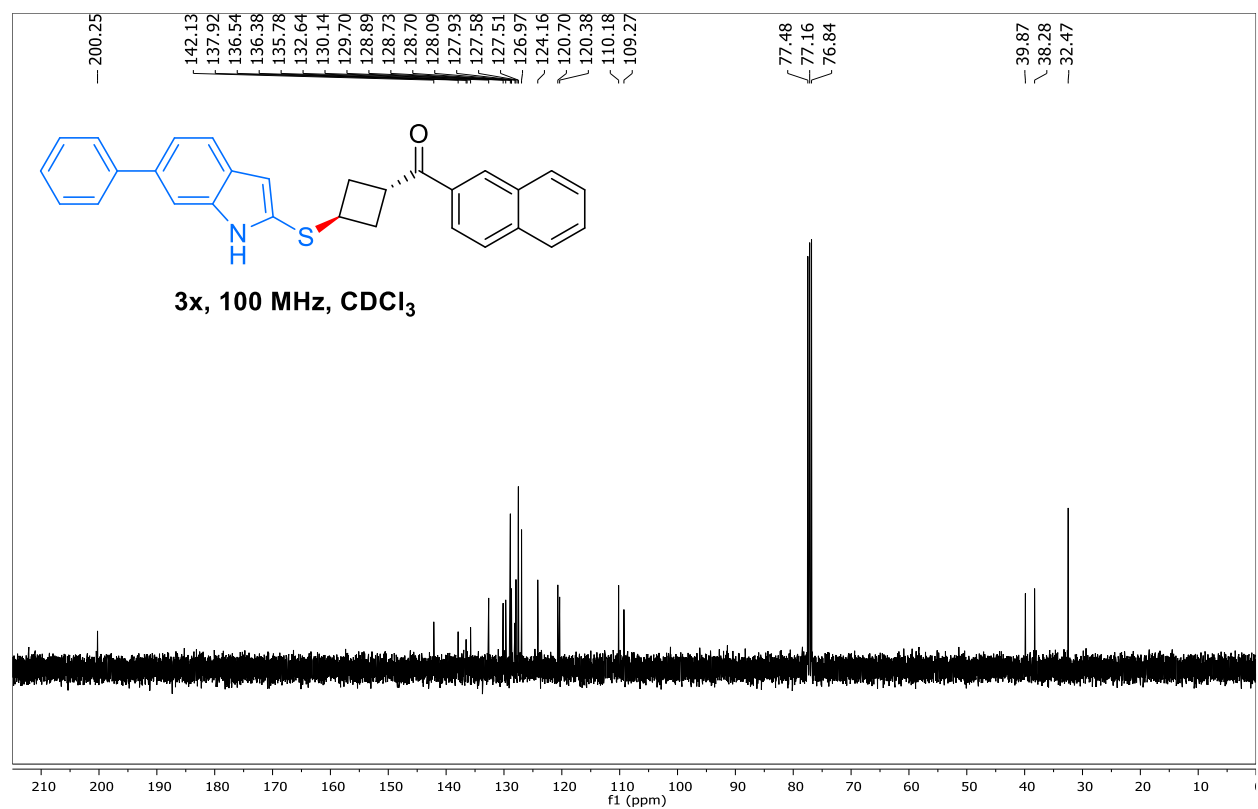



### 3-((7-Methyl-1H-indol-2-yl)thio)cyclobutyl)(naphthalen-2-yl)methanone (3y)

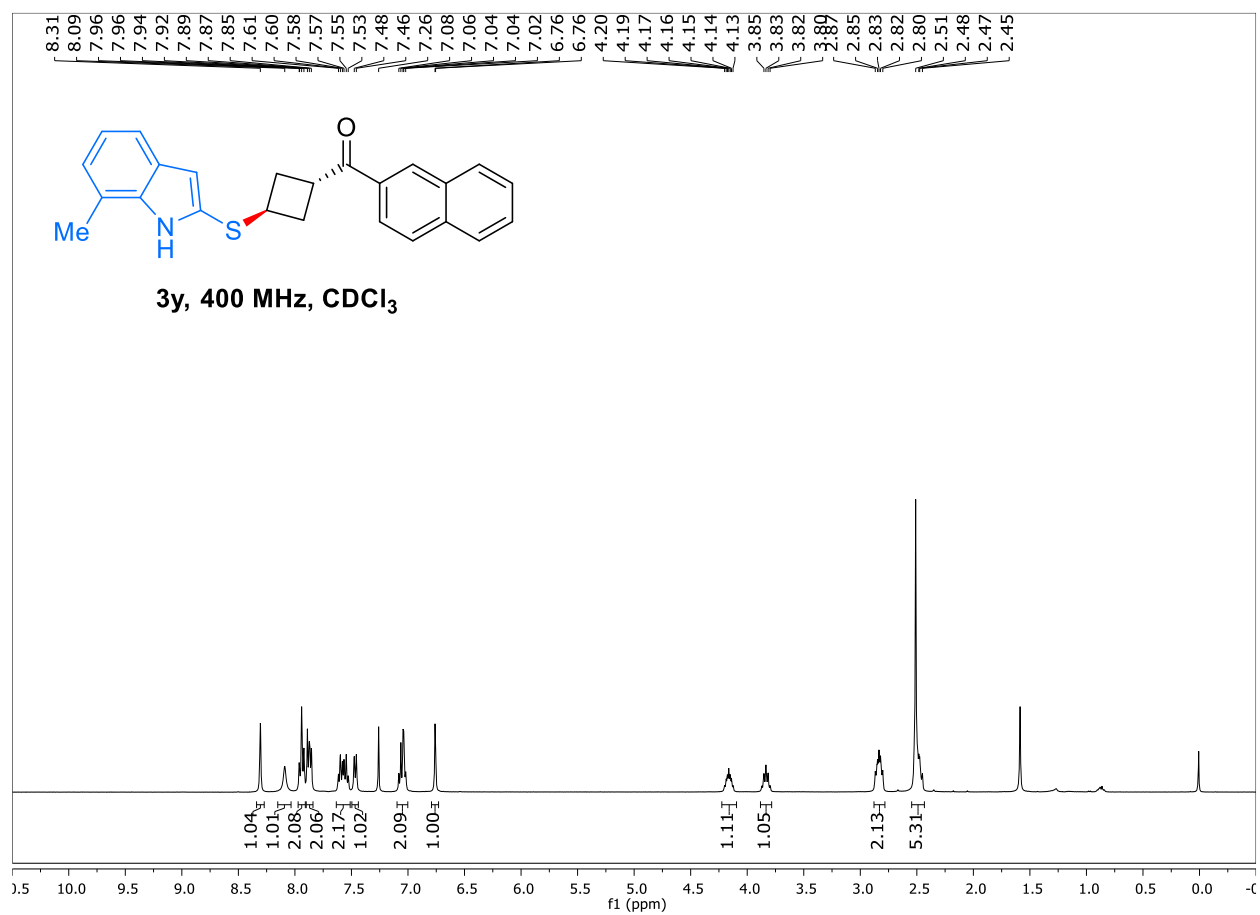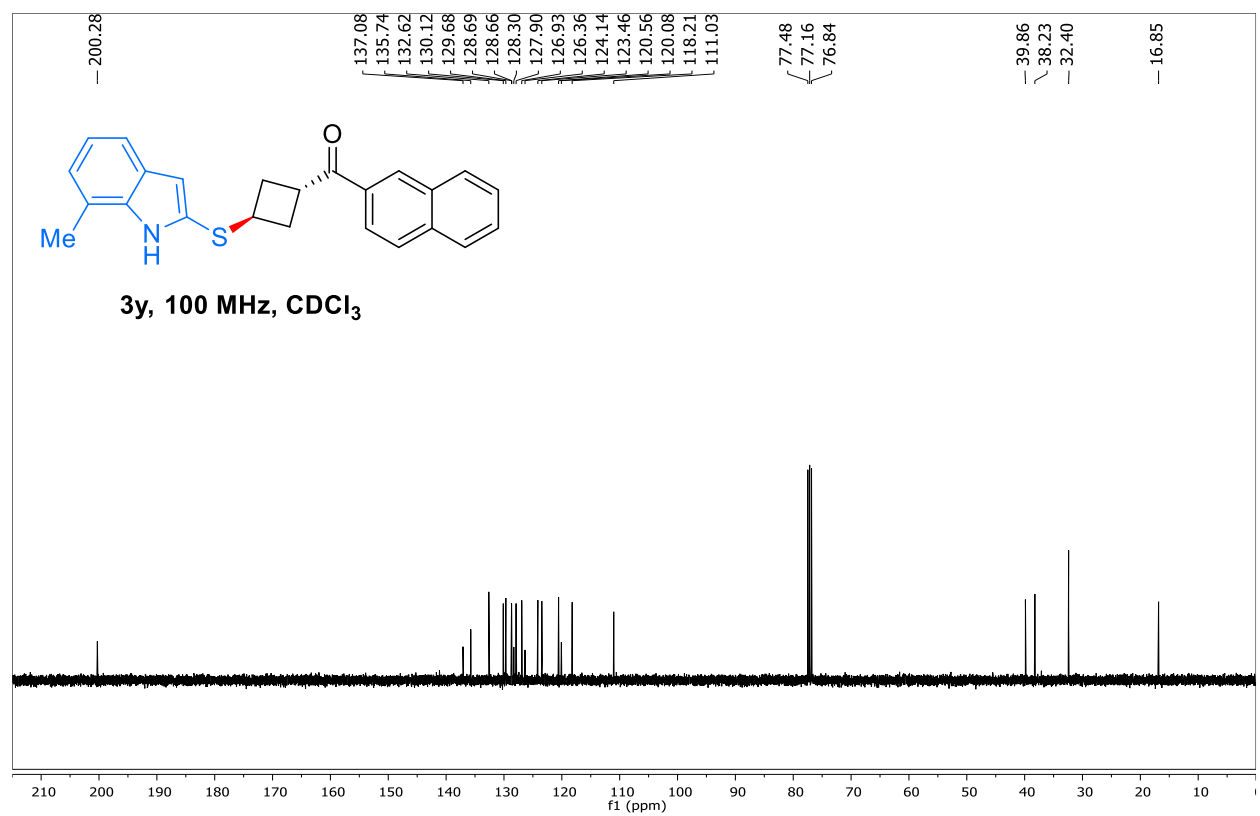

**3-((7-Methoxy-1*H*-indol-2-yl)thio)cyclobutyl)(naphthalen-2-yl)methanone (3z)**

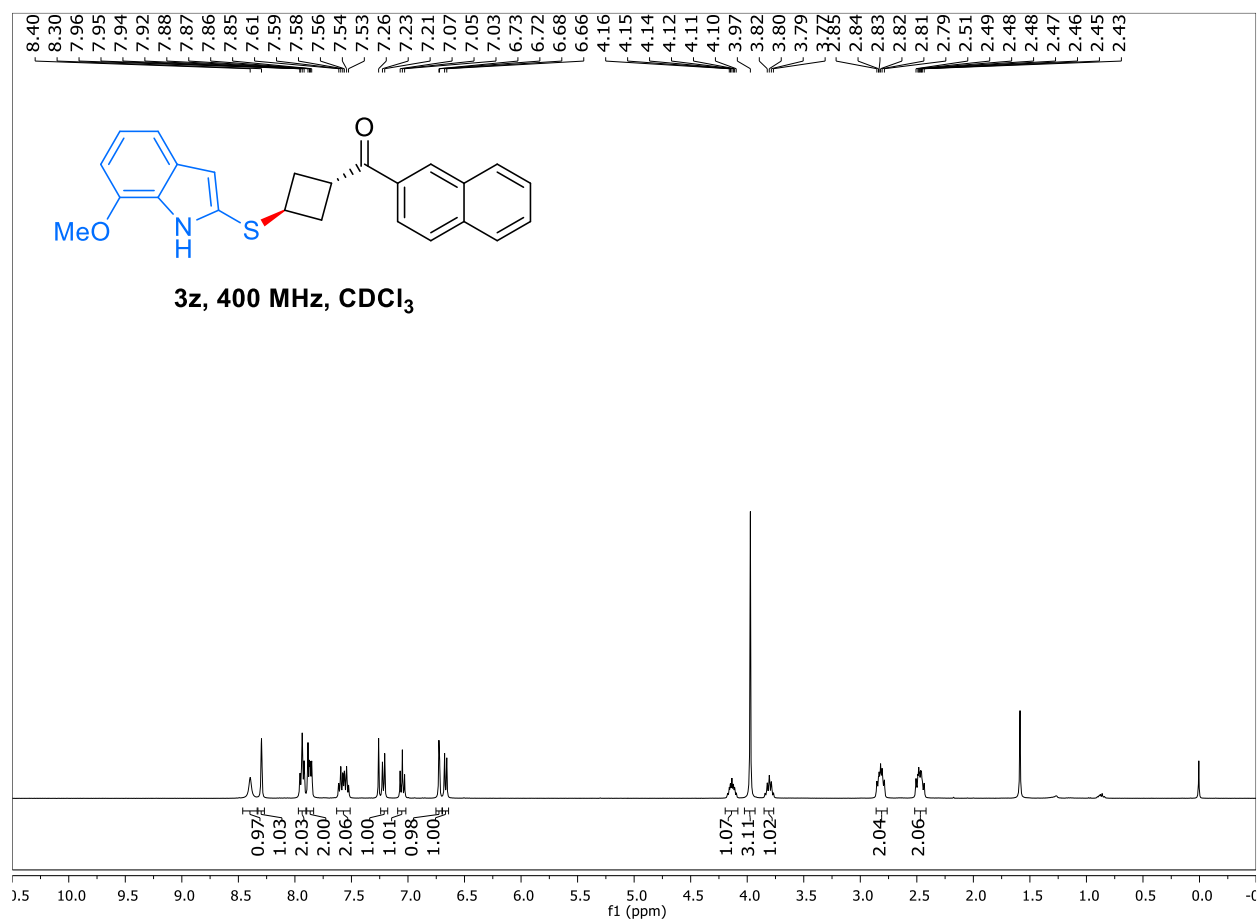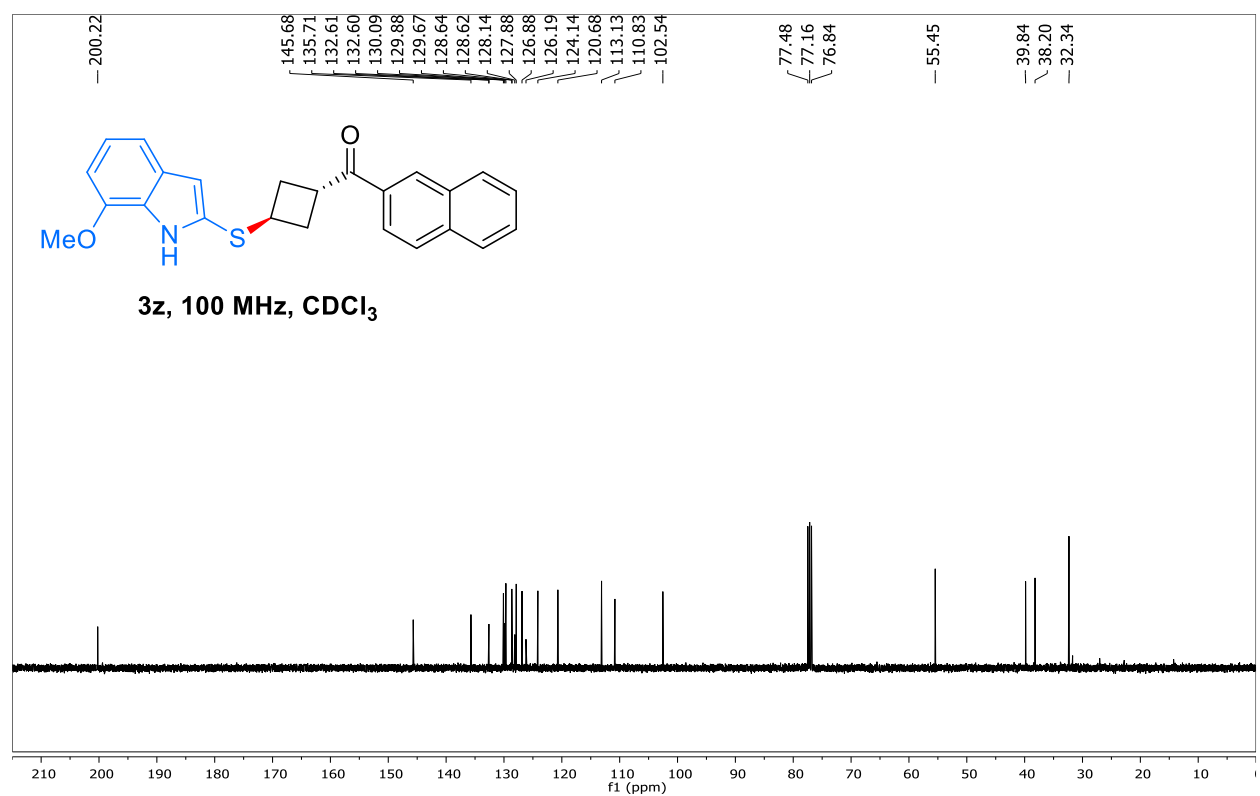

**3-((3,4-Dihydro-2H-pyrrol-5-yl)thio)cyclobutyl(naphthalen-2-yl)methanone (5a)**

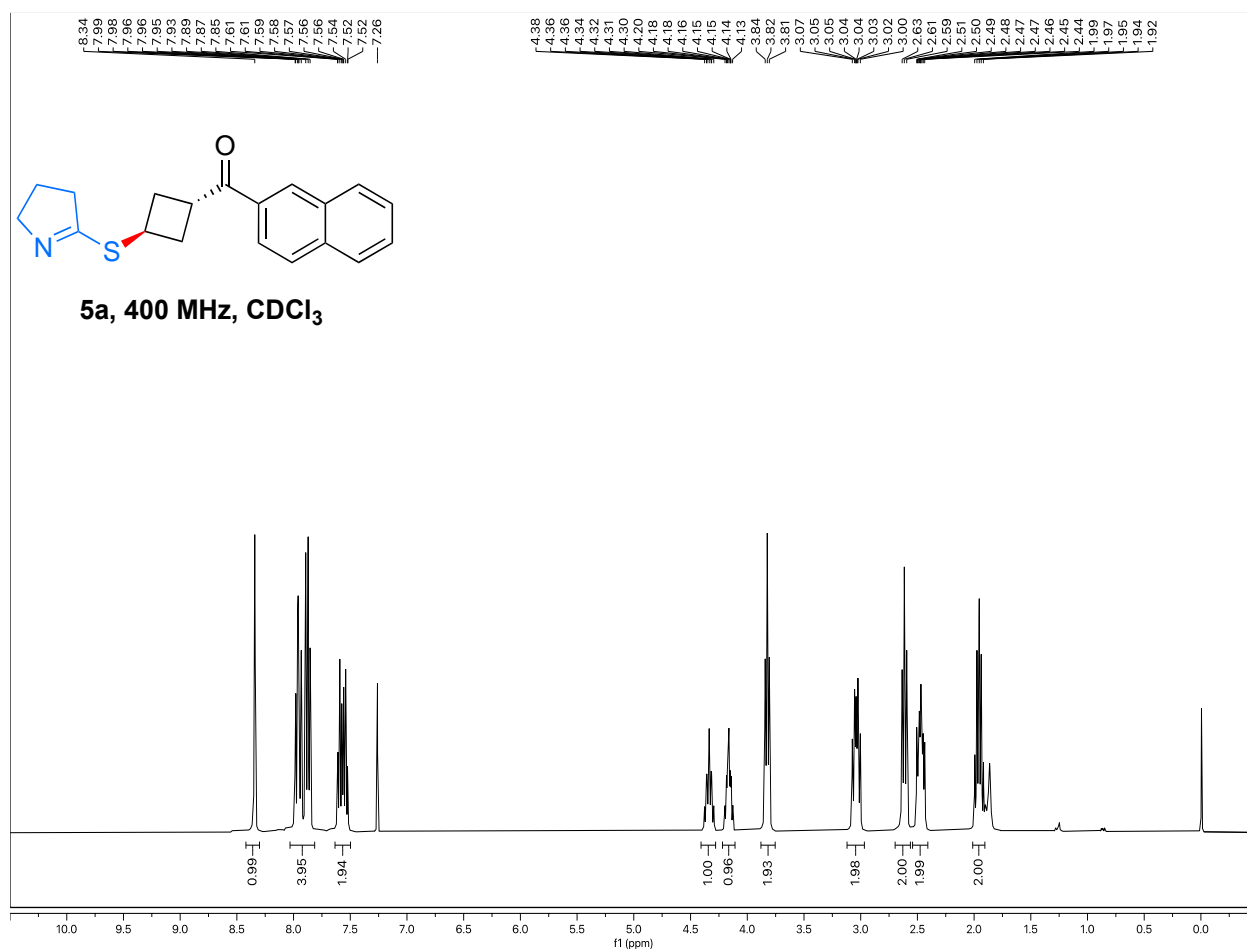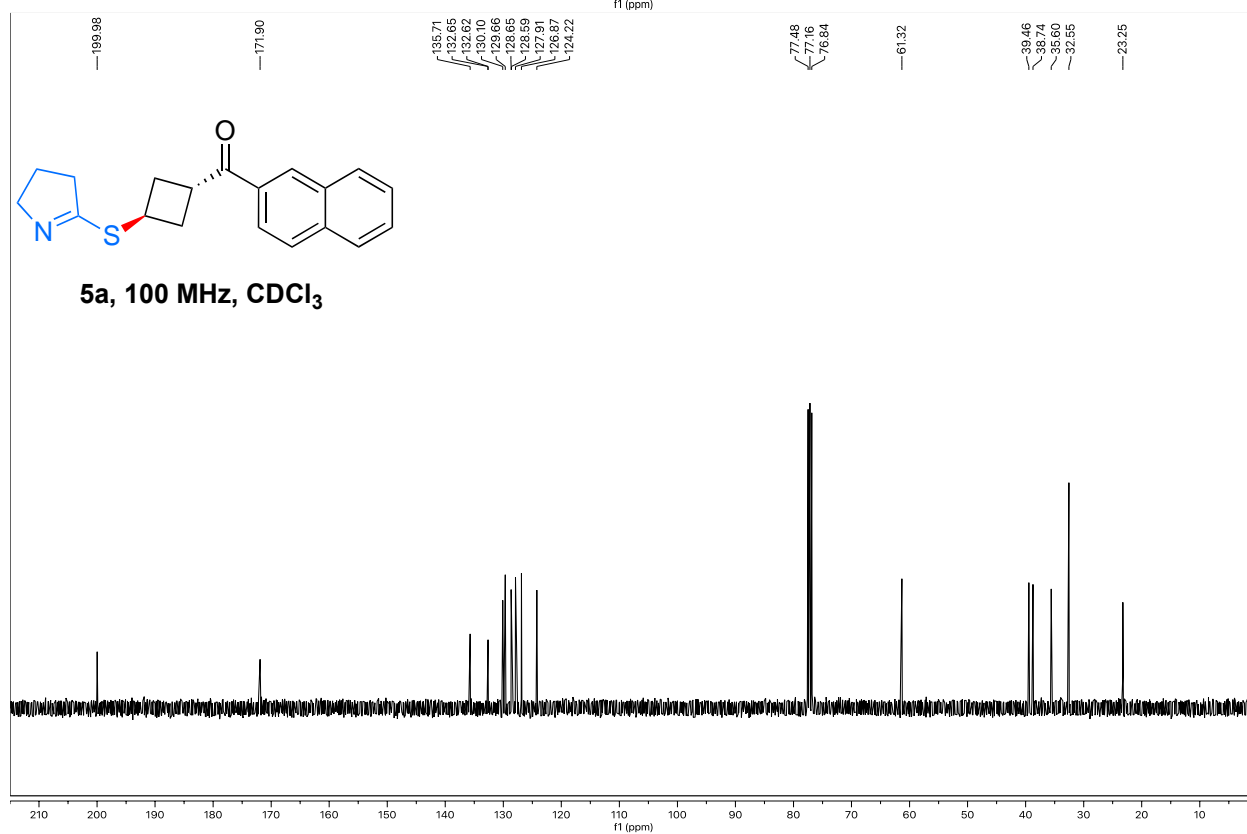

Naphthalen-2-yl(3-((3,4,5,6-tetrahydropyridin-2-yl)thio)cyclobutyl)methanone (5b)

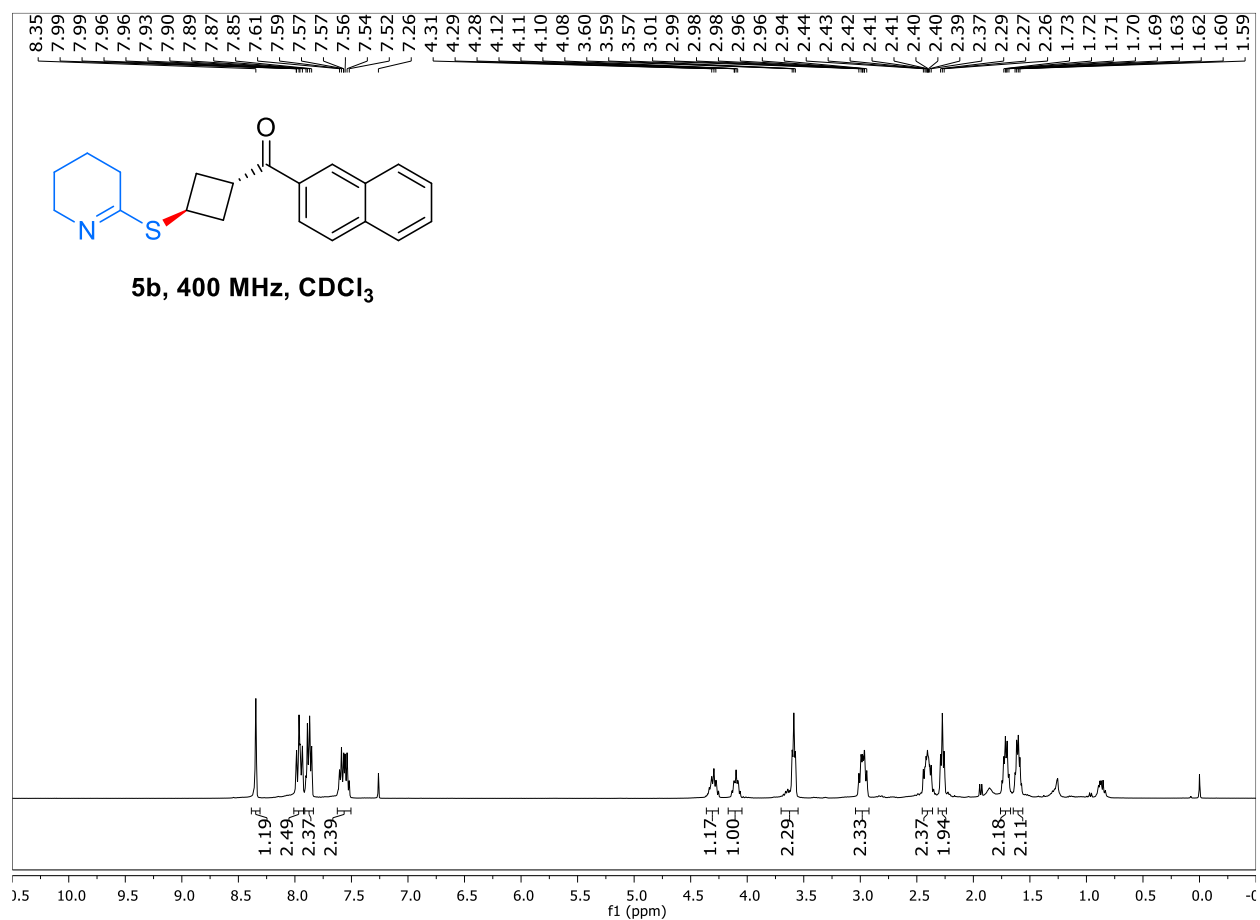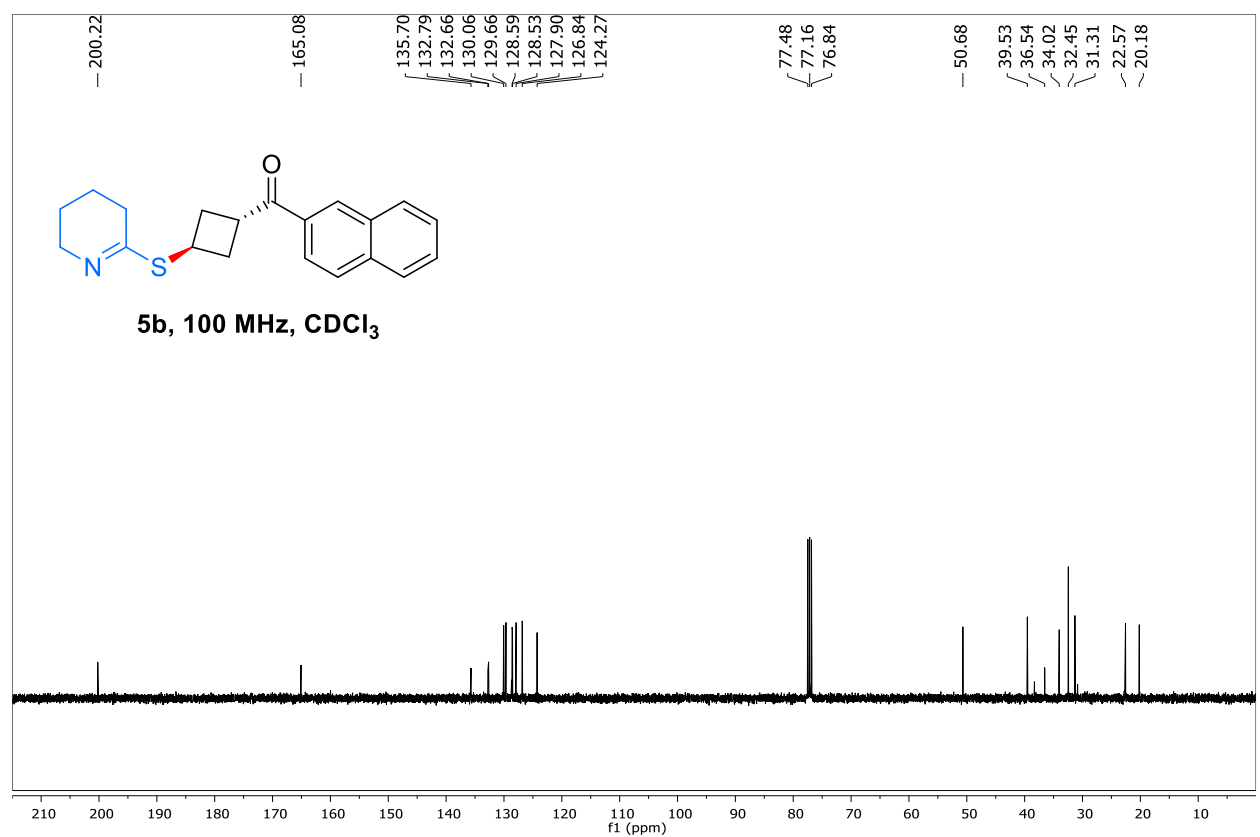

Naphthalen-2-yl(3-((3,4,5,6-tetrahydro-2H-azepin-7-yl)thio)cyclobutyl)methanone (**5c**)

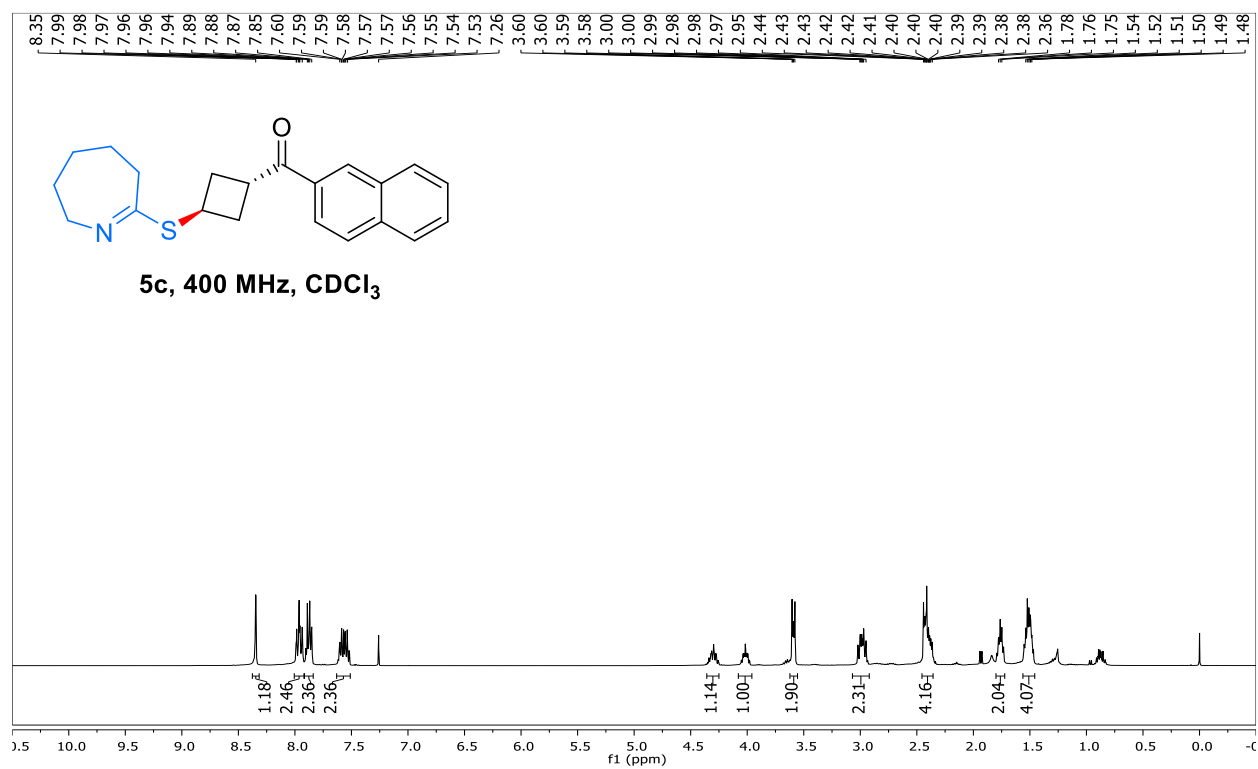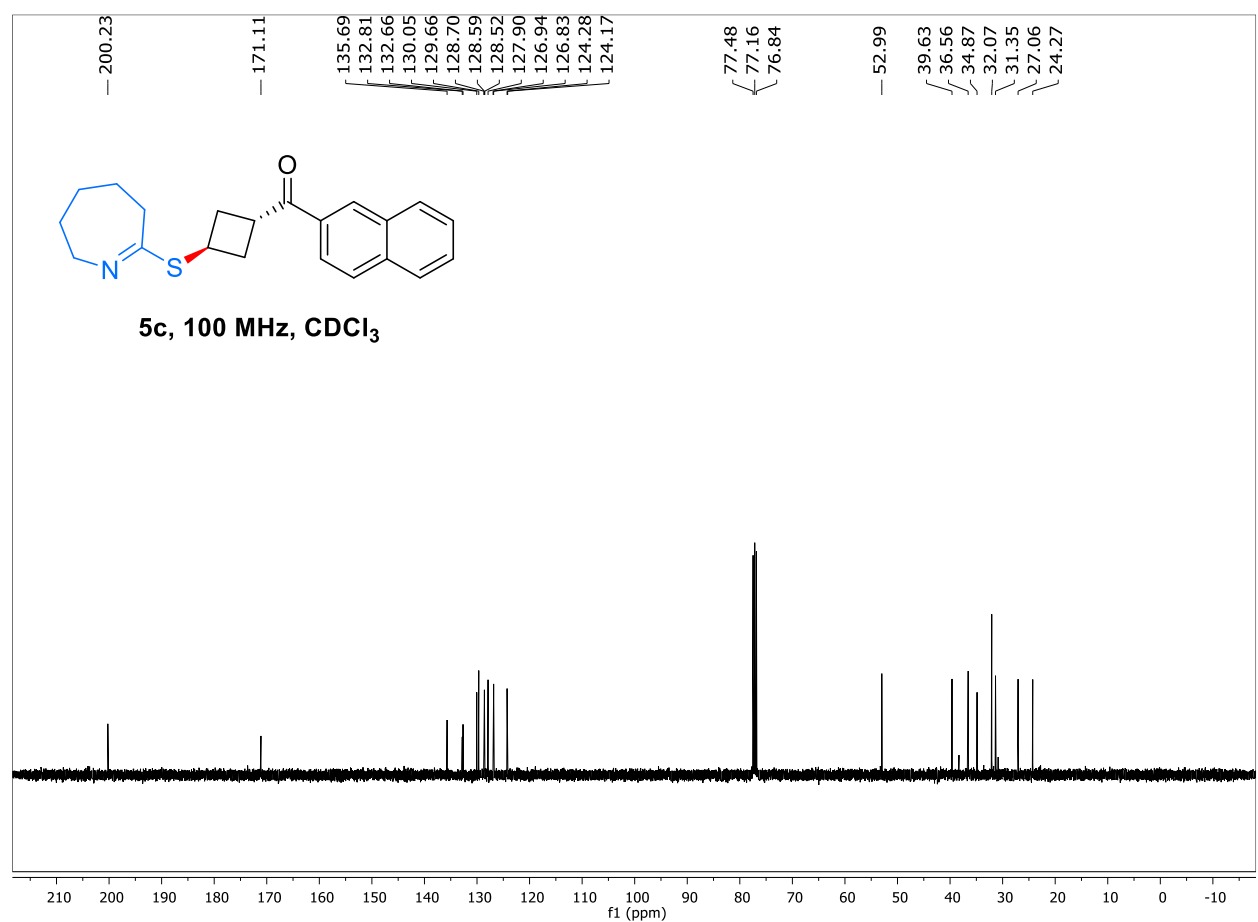

**3-(((E)-3,4,5,6,7,8-Hexahydroazocin-2-yl)thio)cyclobutyl(naphthalen-2-yl)methanone (5d)**

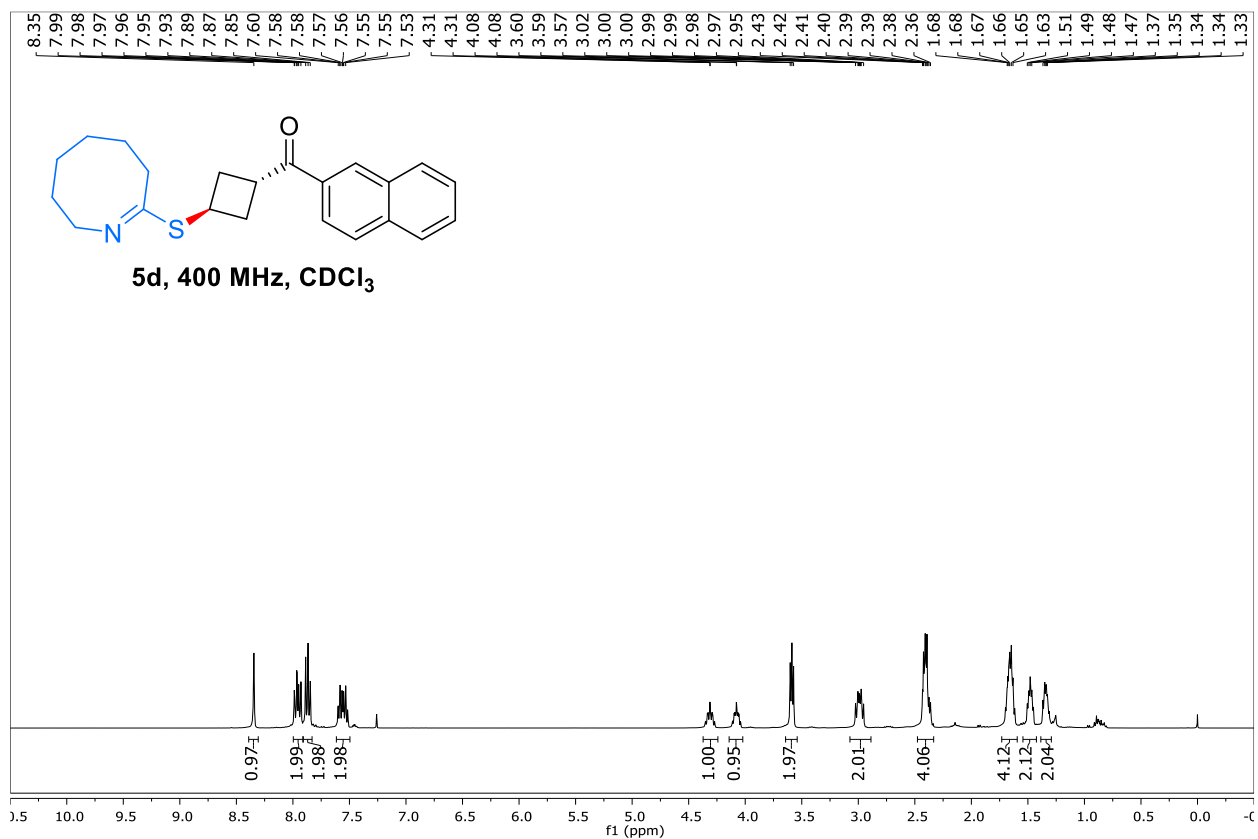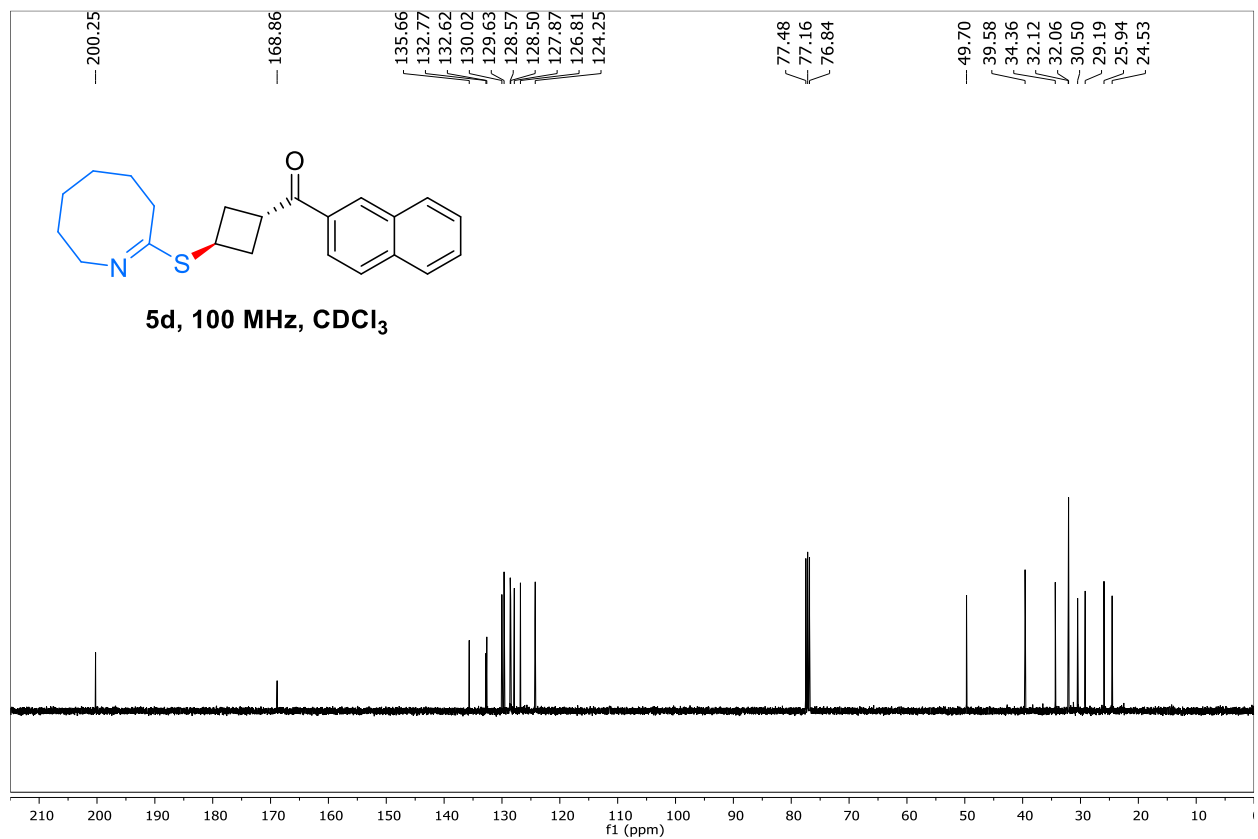

**(3-((3,4-Dihydroquinolin-2-yl)thio)cyclobutyl)(naphthalen-2-yl)methanone (5e)**

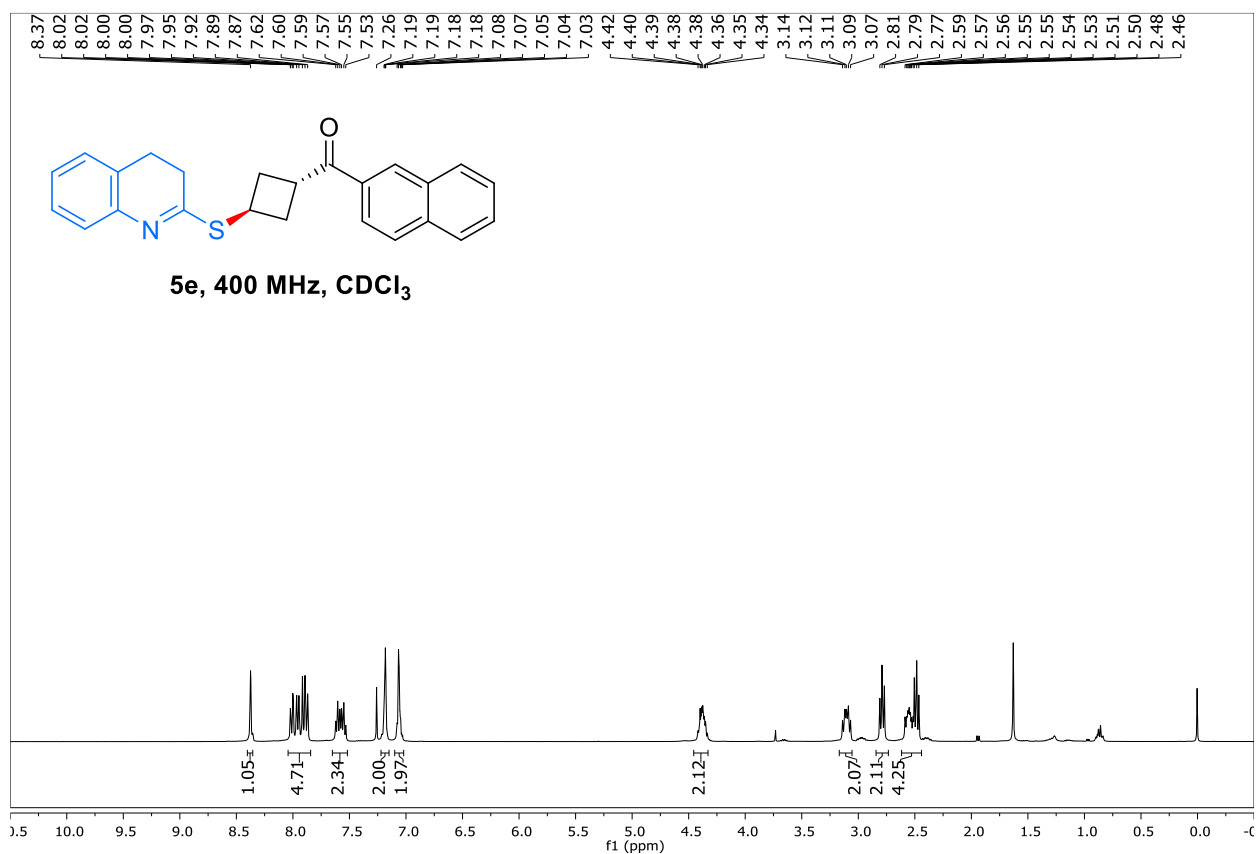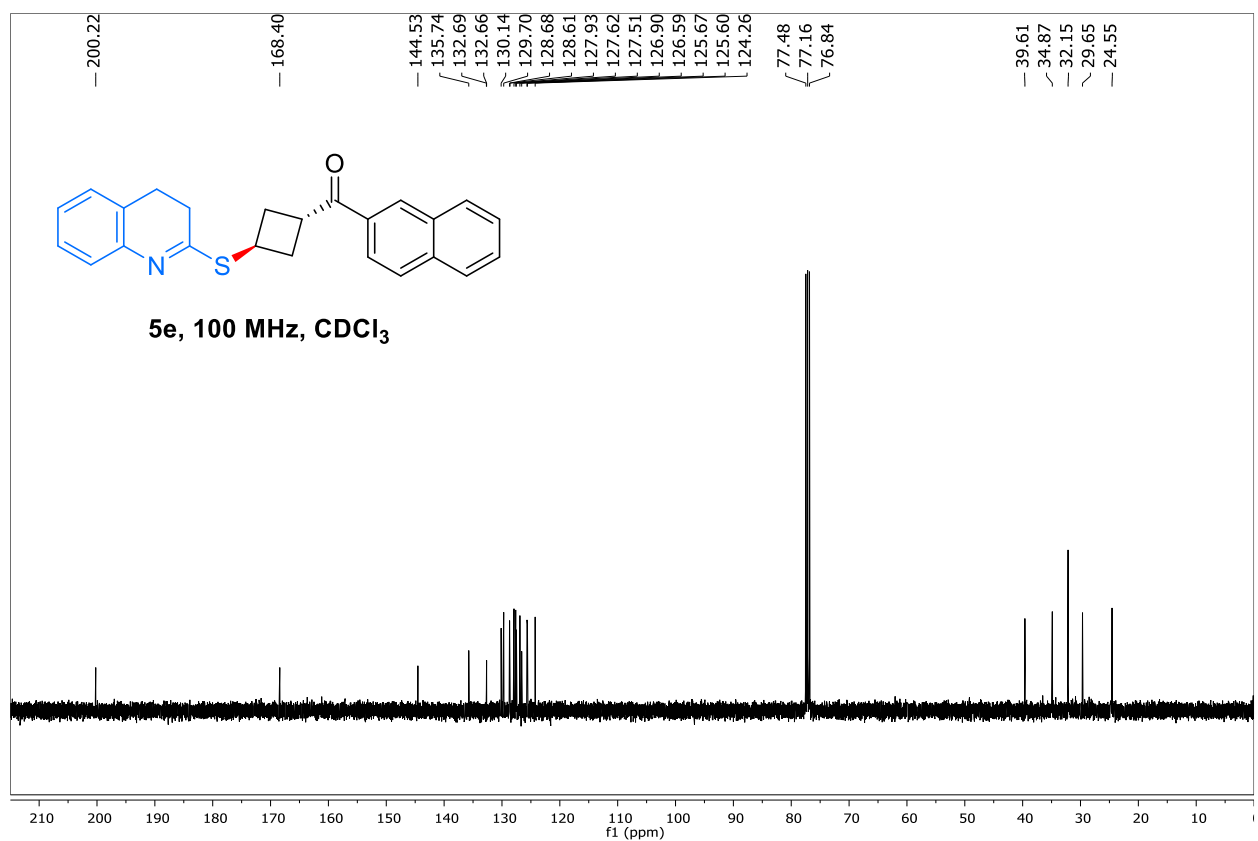

### 3-((3,4-Dihydro-2H-pyrrol-5-yl)thio)cyclobutyl)pentan-1-one (5f)

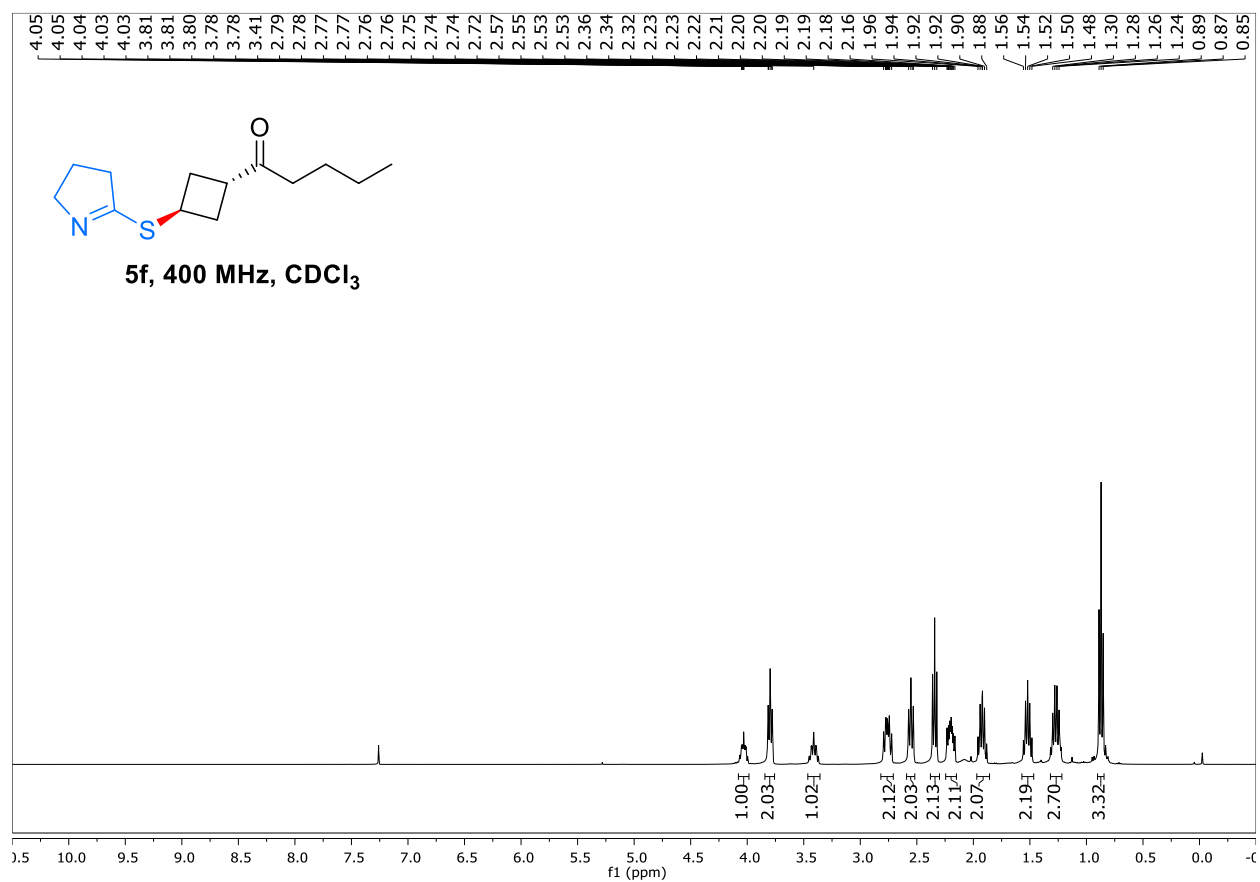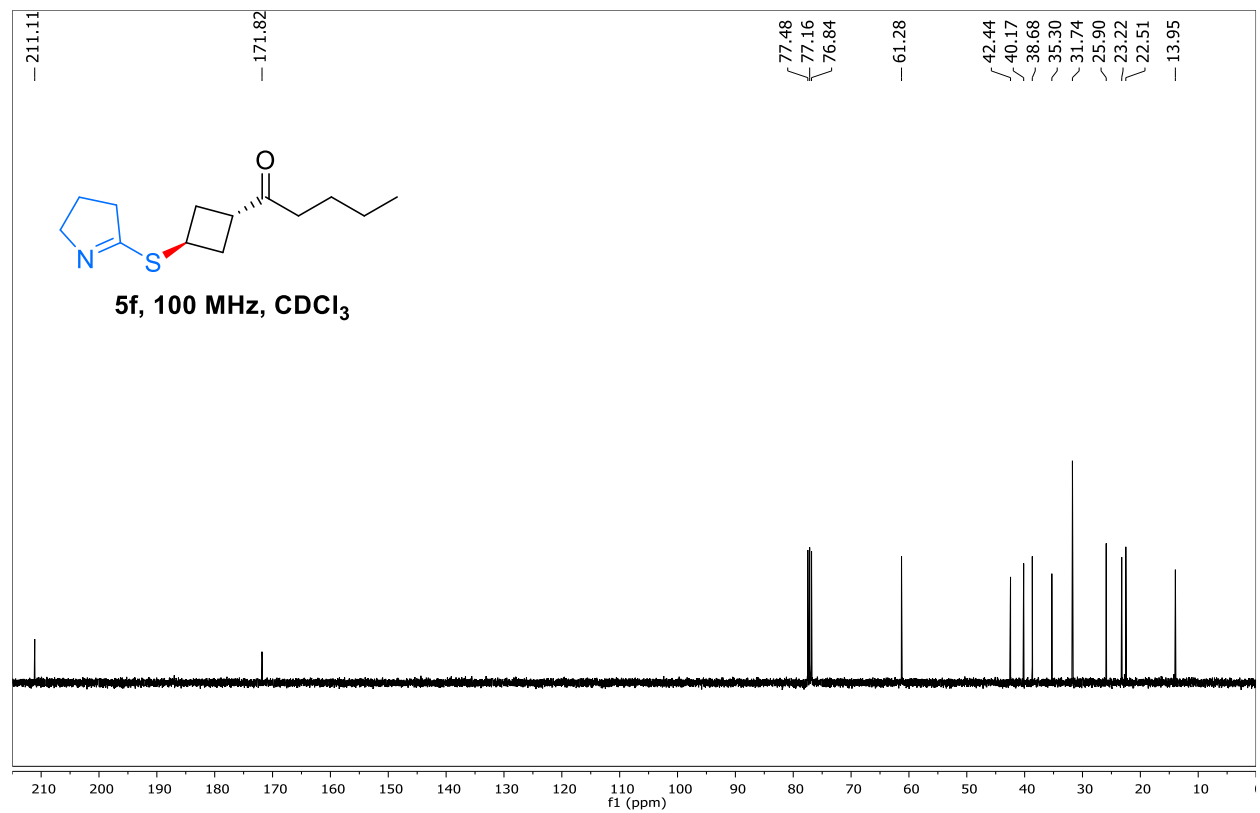



**(3-((3,3-Dimethyl-3H-indol-2-yl)thio)cyclobutyl)(naphthalen-2-yl)methanone (5g)**

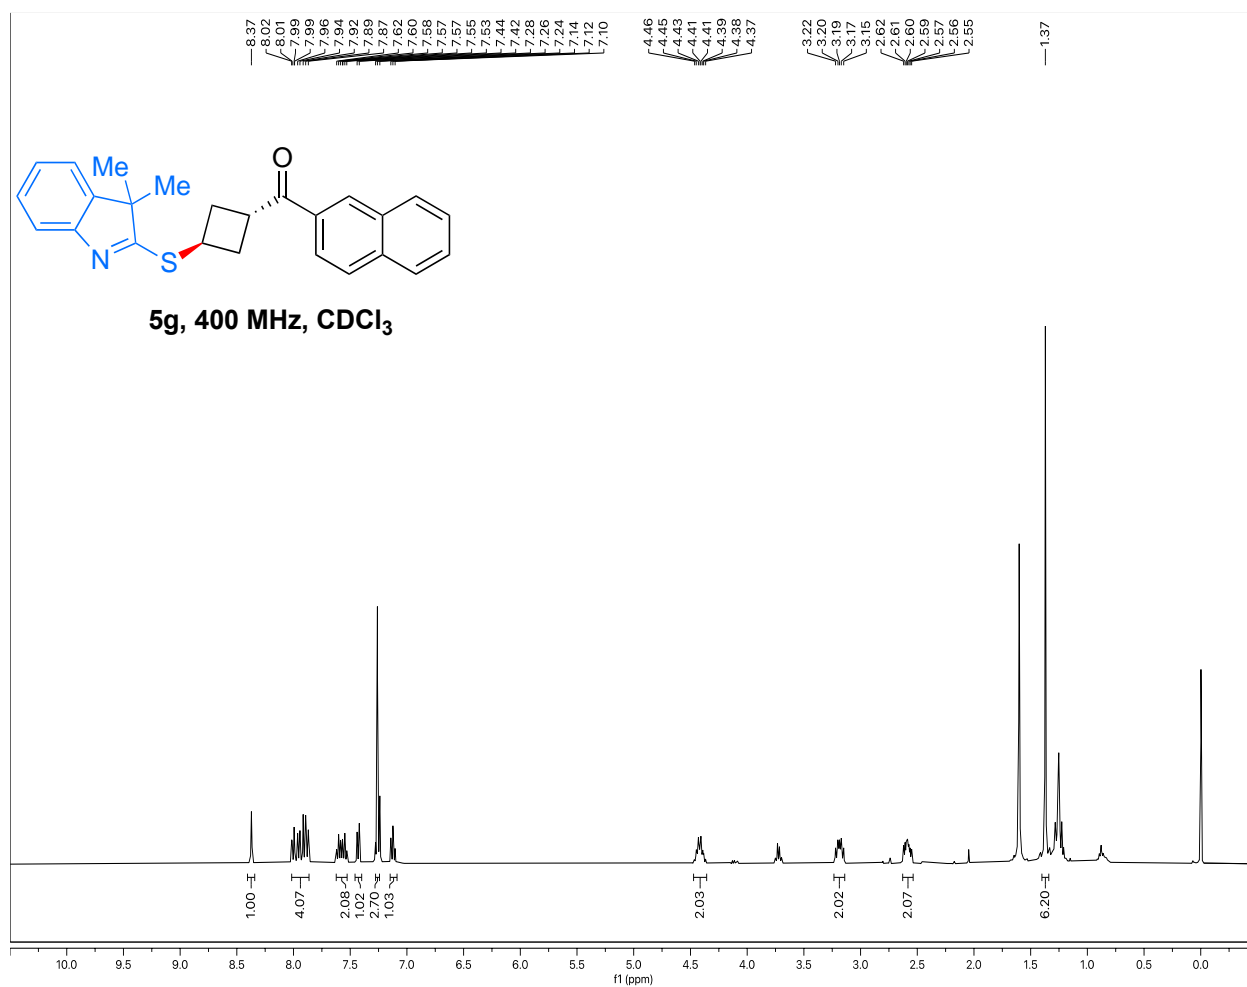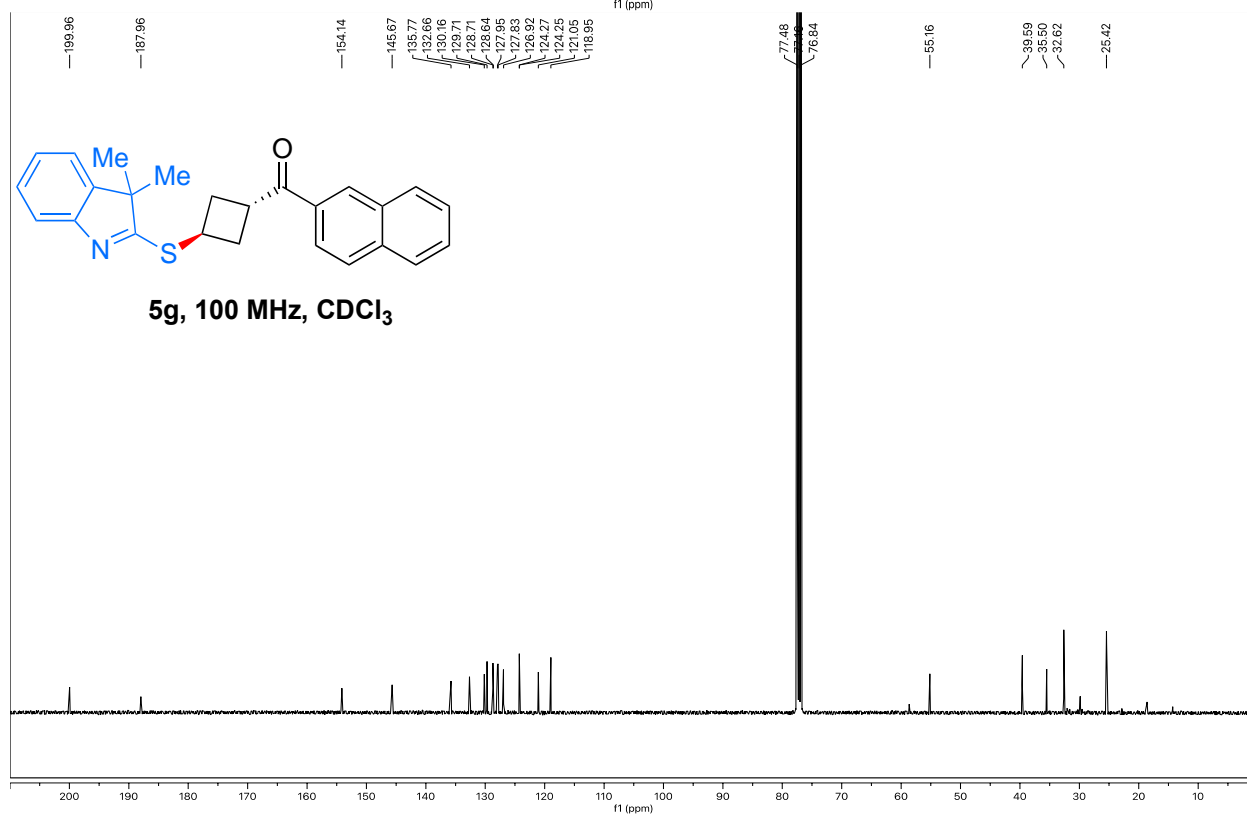

**(10-Methyl-5-phenyl-2,3,5,10-tetrahydro-4H-2,4-methanothiepine[2,3-b]indol-4-yl)(naphthalen-2-yl)methanone (5i)**

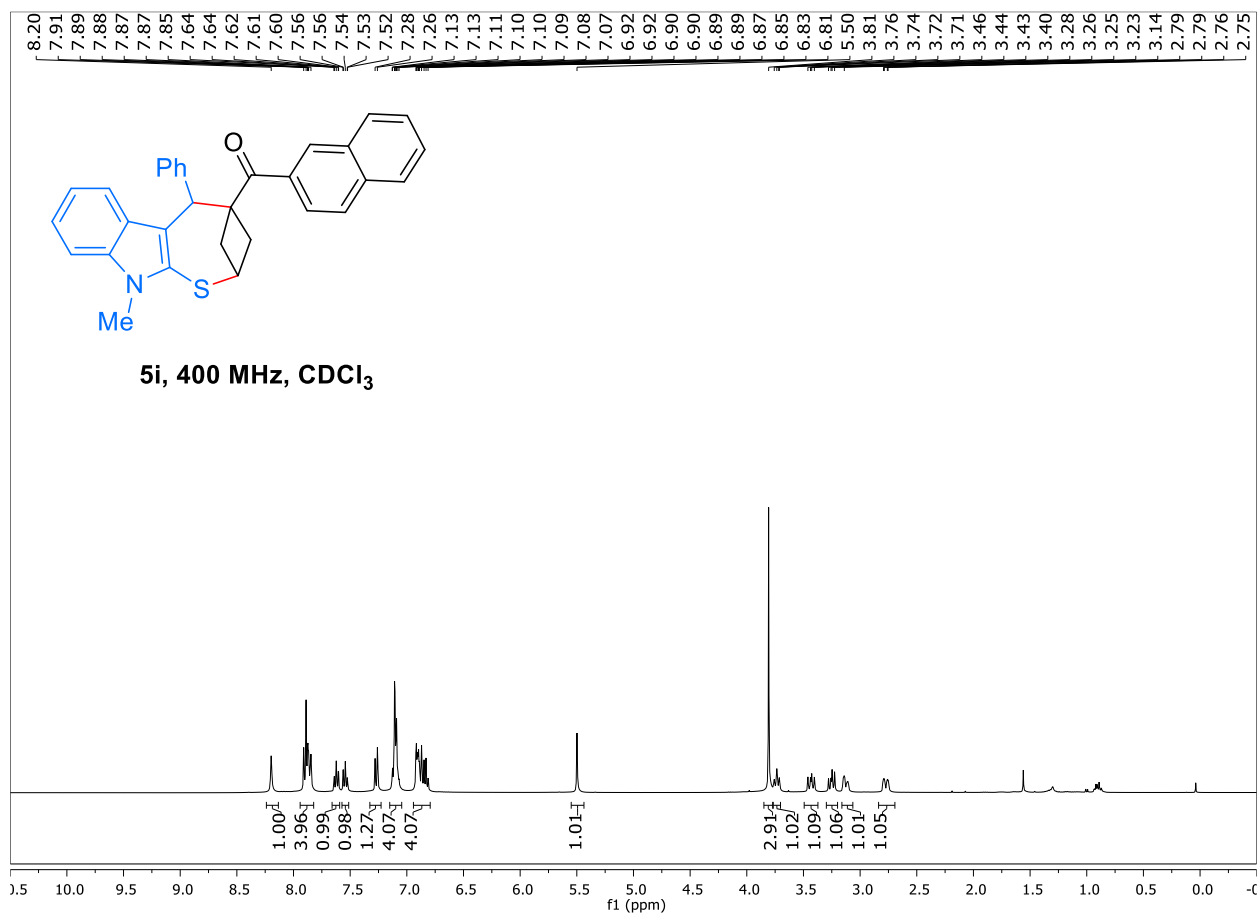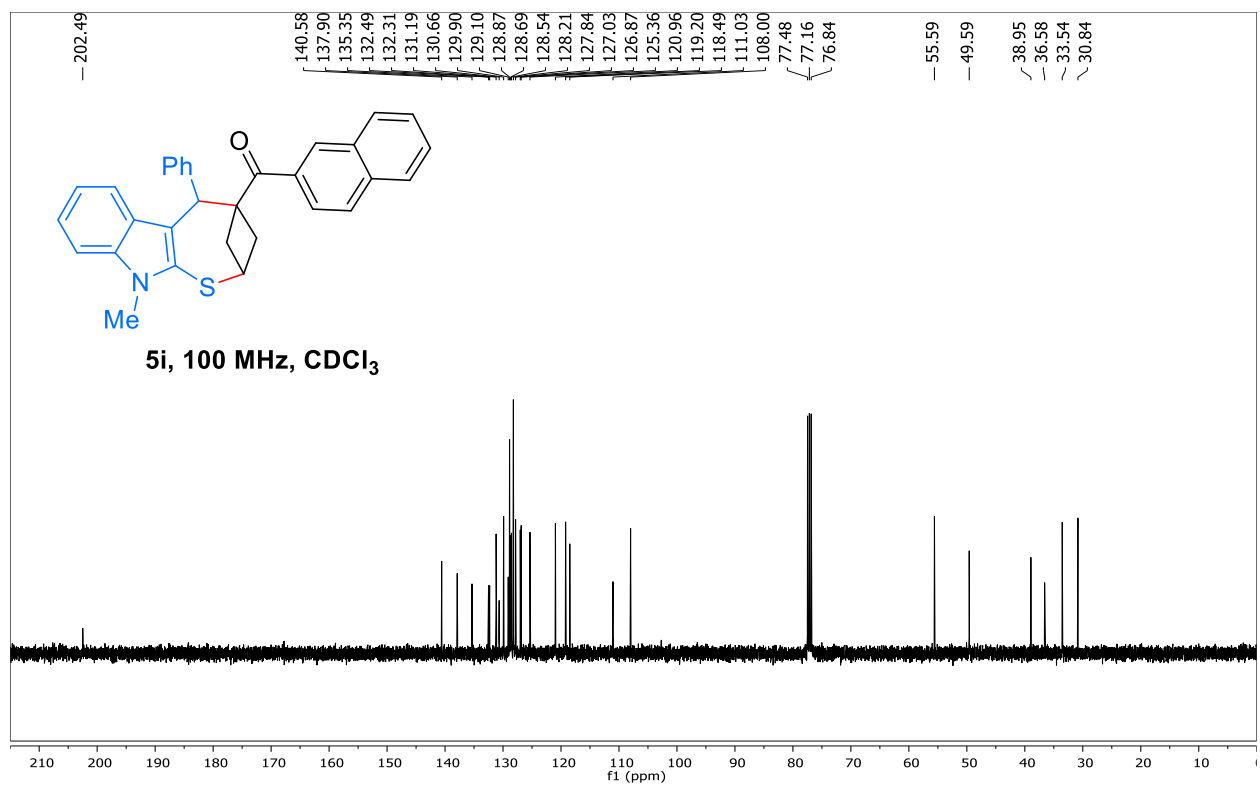

**3-((3,3-Dibromo-3*H*-indol-2-yl)thio)cyclobutyl)(naphthalen-2-yl)methanone (6)**

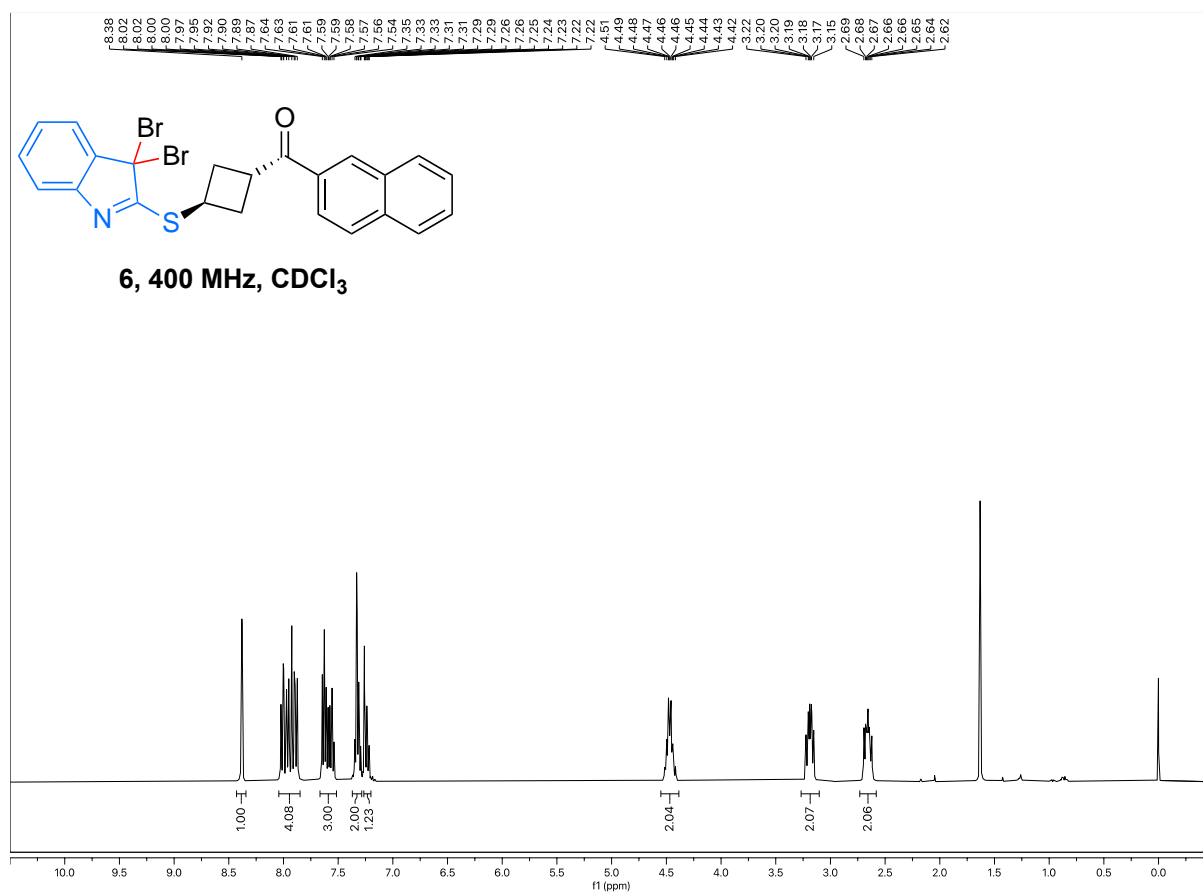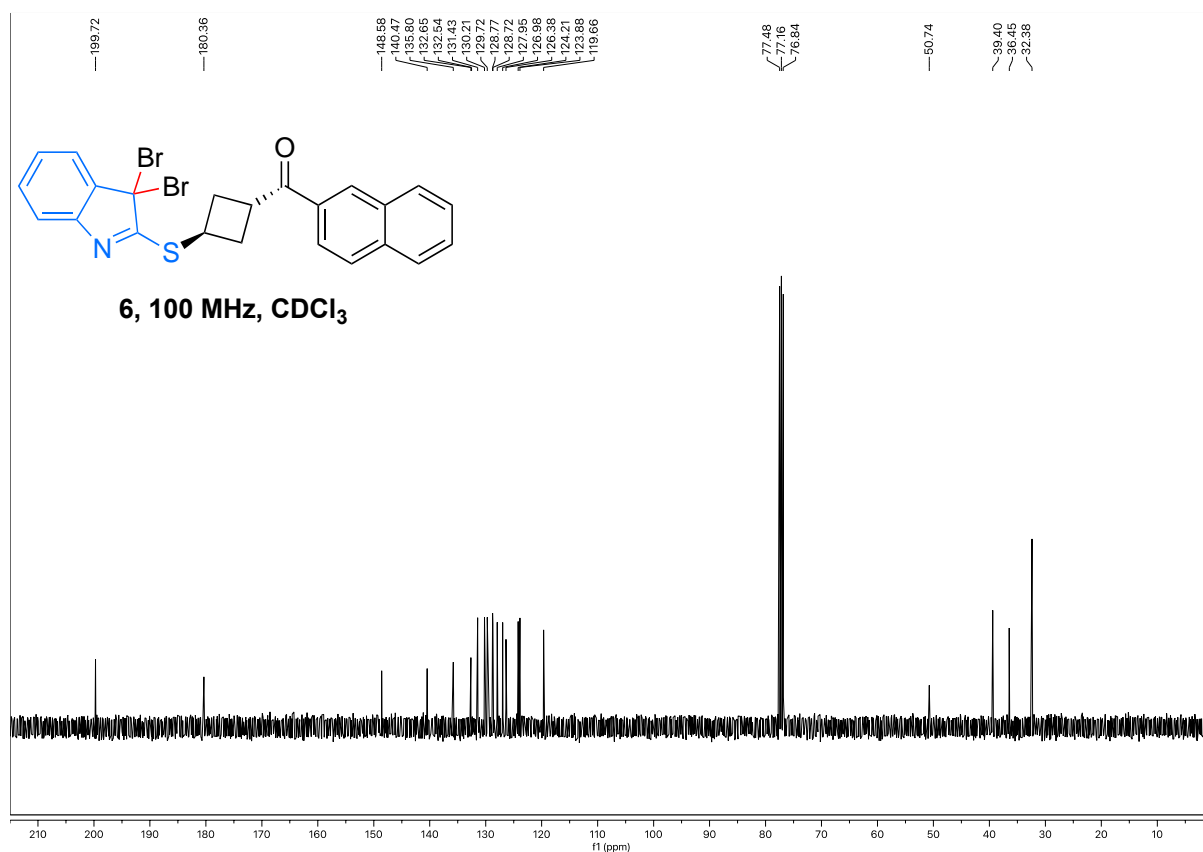

**(3-(1*H*-Indol-2-yl)sulfinyl)cyclobutyl)(naphthalen-2-yl)methanone (7)**

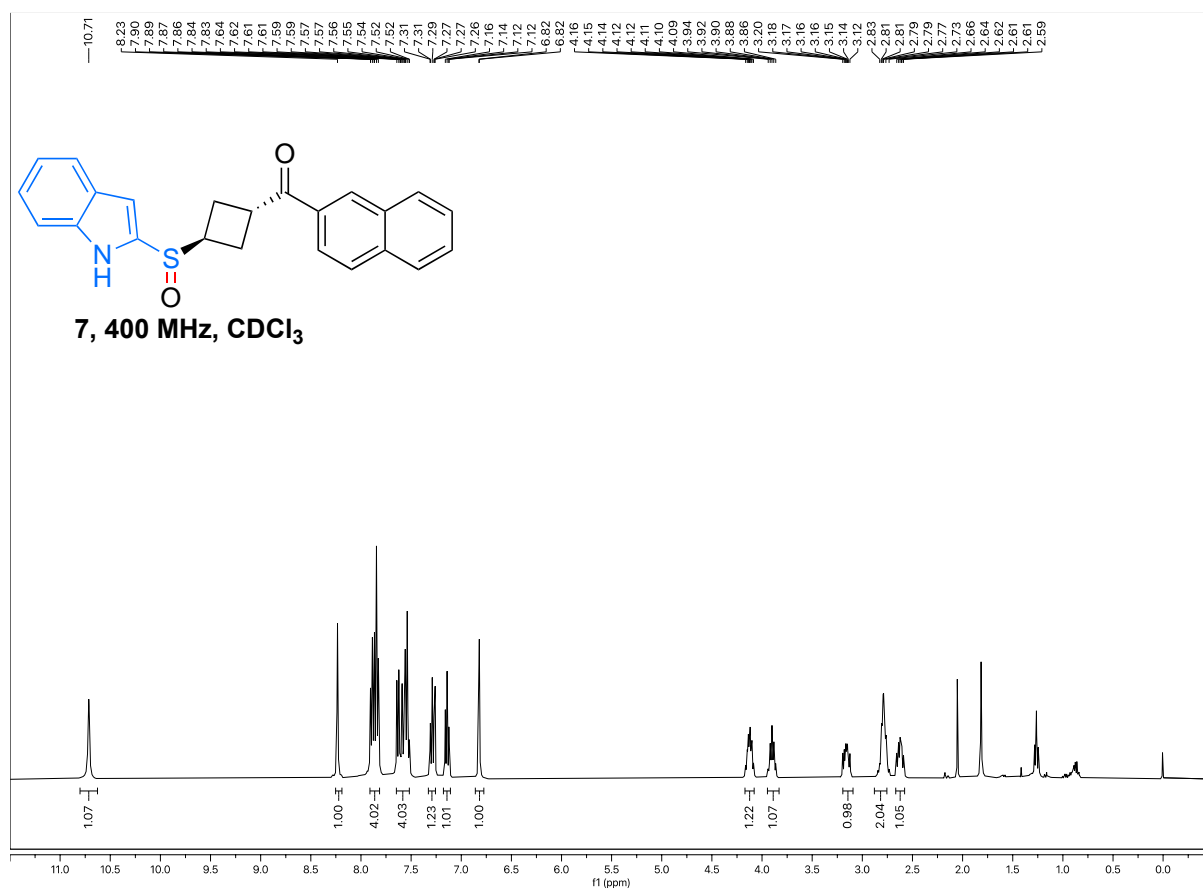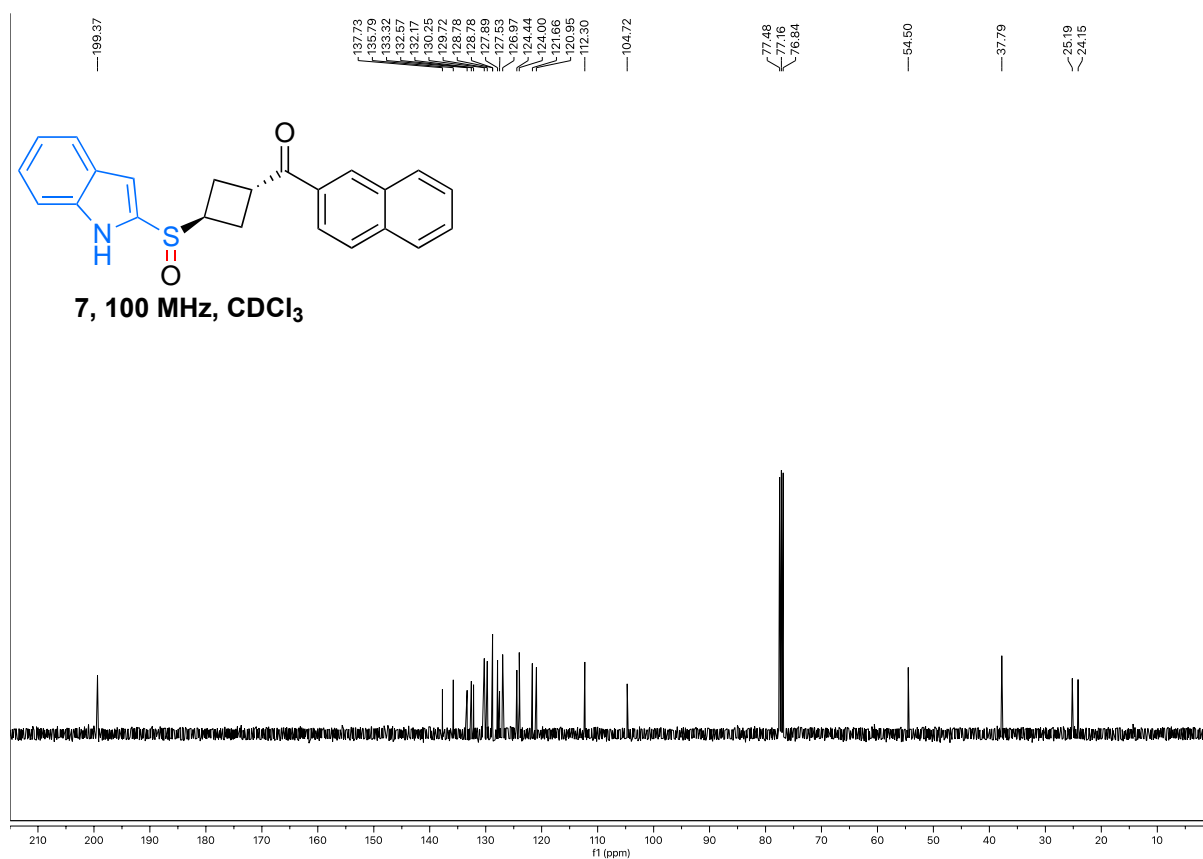

**(3-((1*H*-Indol-2-yl)sulfonyl)cyclobutyl)(naphthalen-2-yl)methanone (8)**

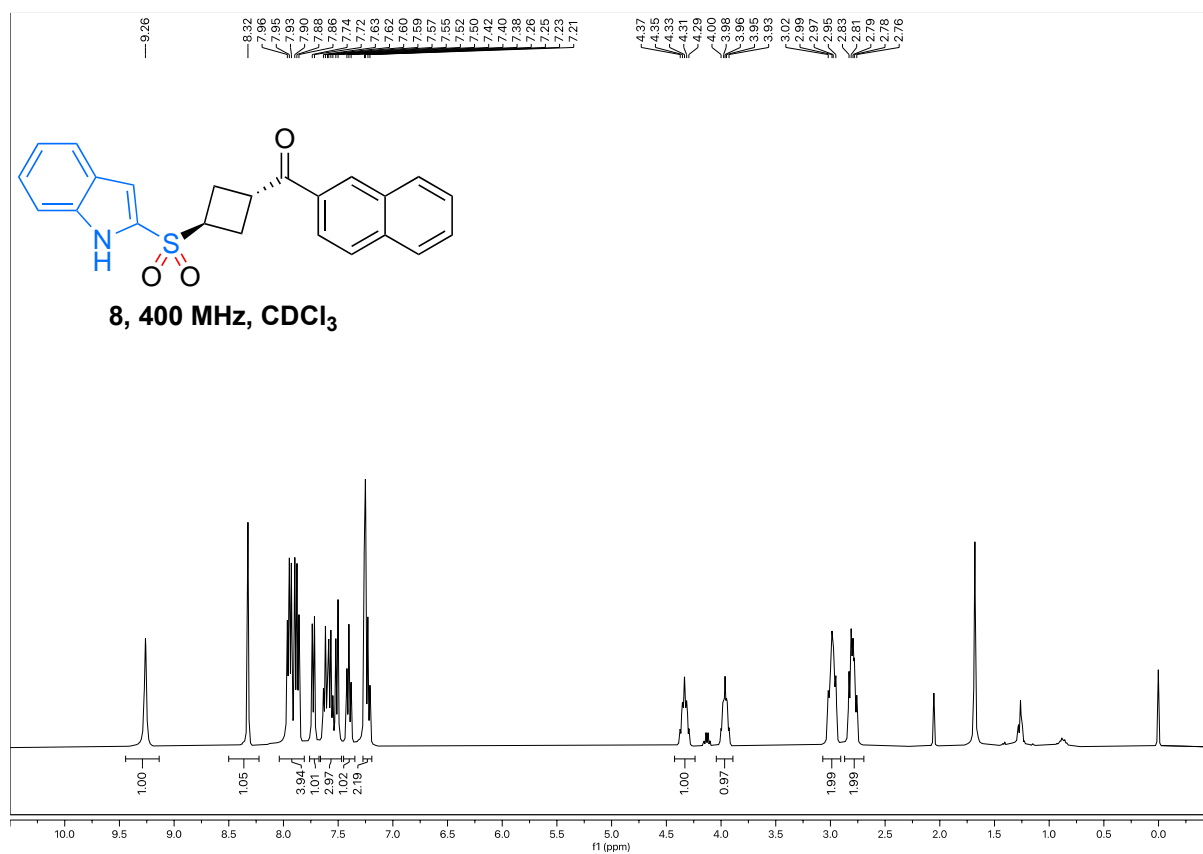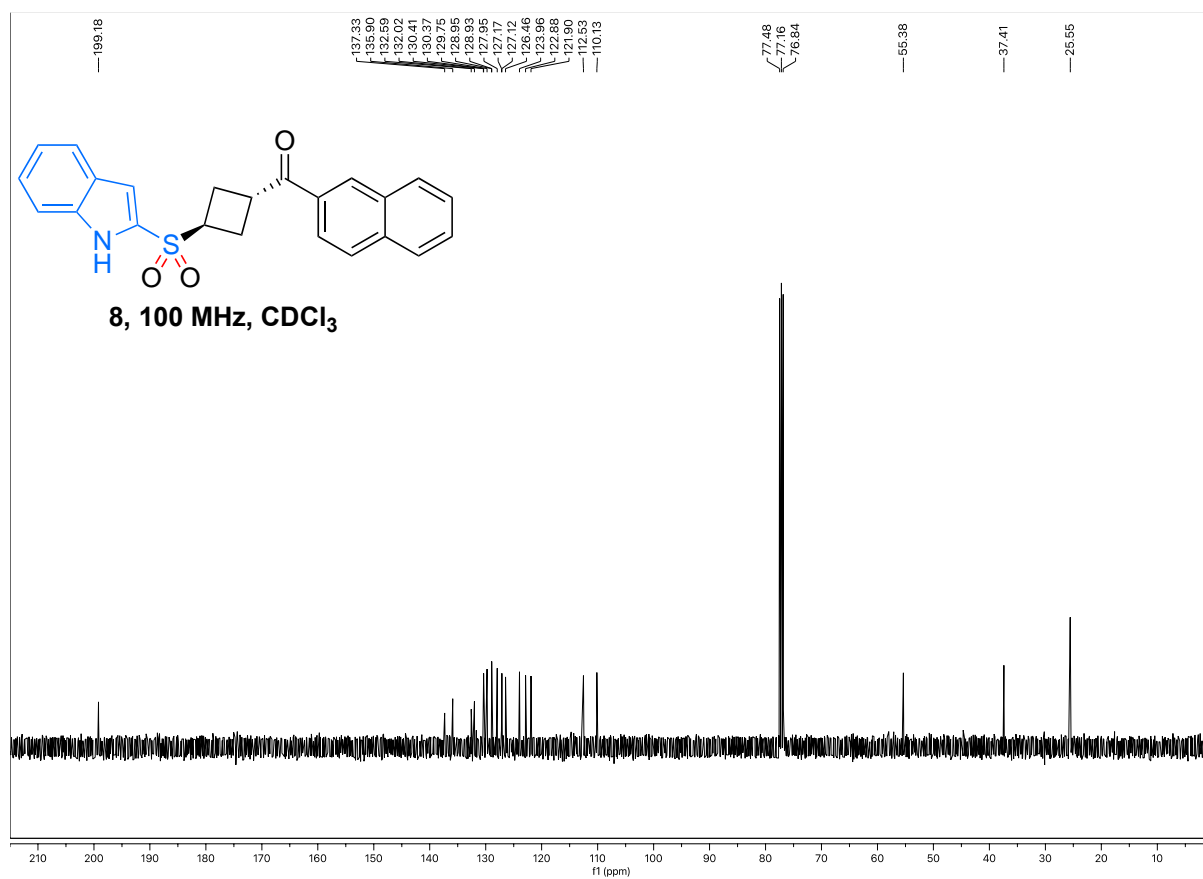

**3-((1*H*-Indol-2-yl)thio)cyclobutyl)(naphthalen-2-yl)methanol (9)**

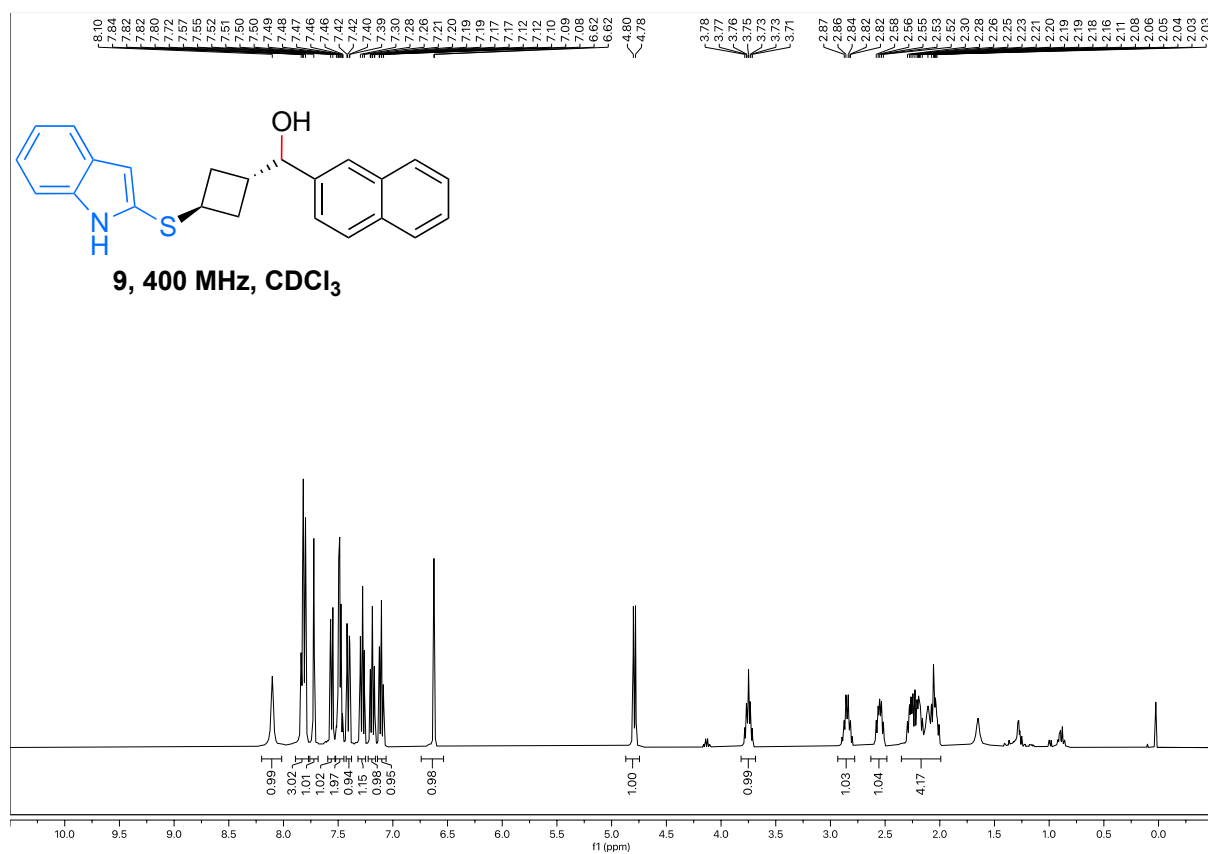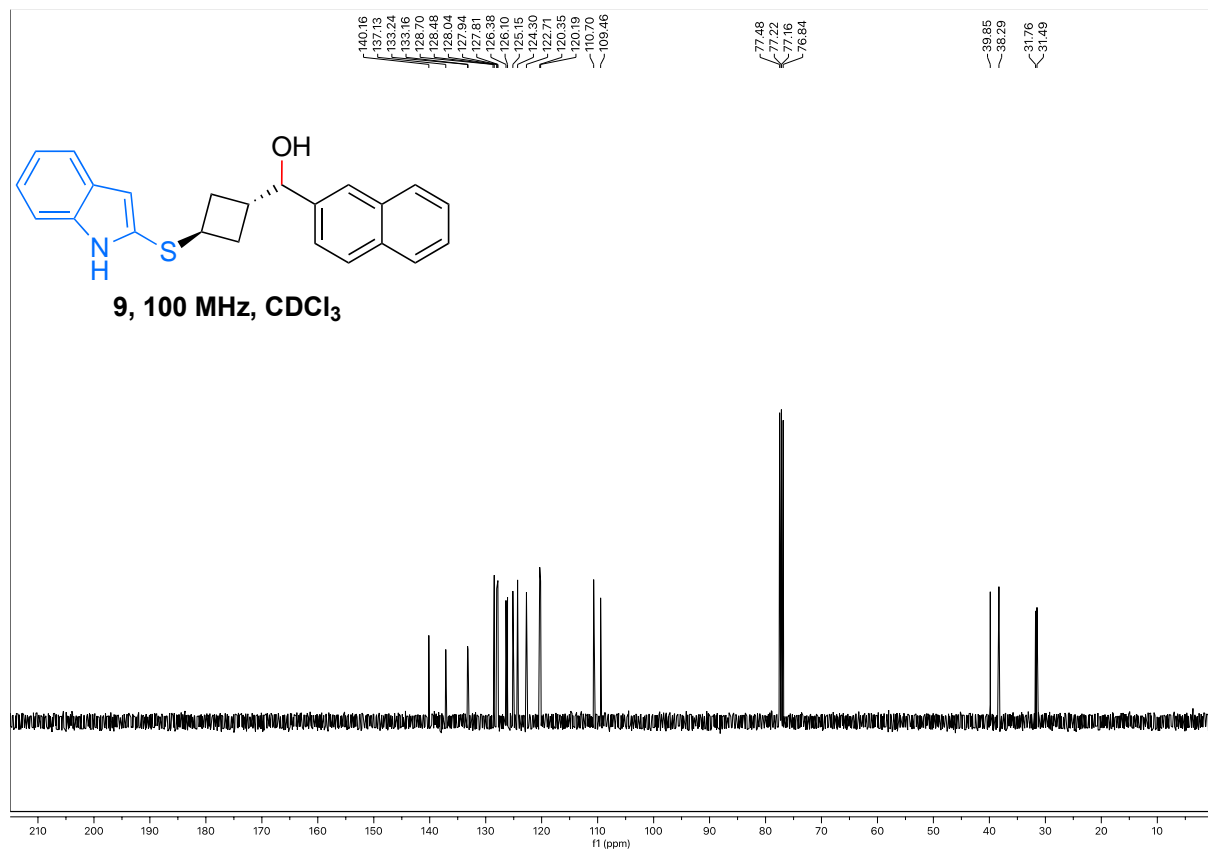

**1-(3-((1*H*-Indol-2-yl)thio)cyclobutyl)-1-(naphthalen-2-yl)prop-2-en-1-ol (10)**

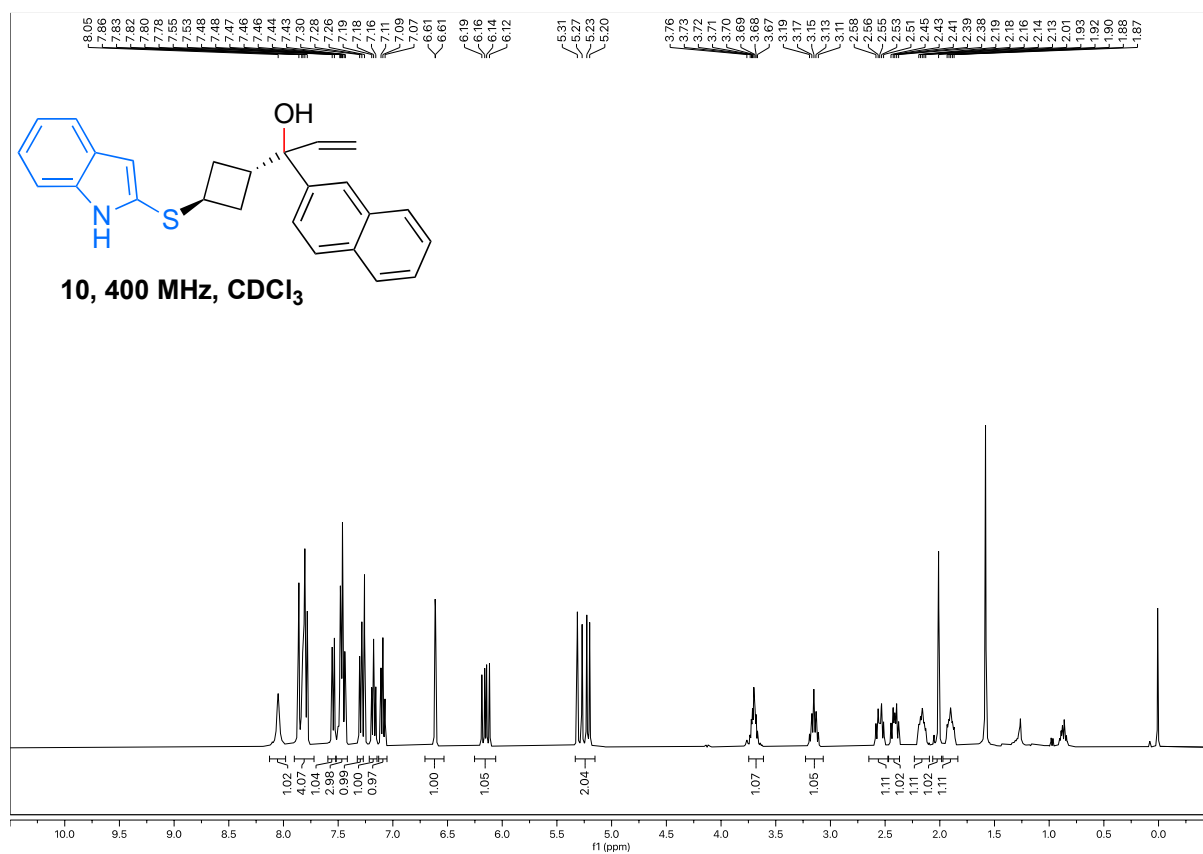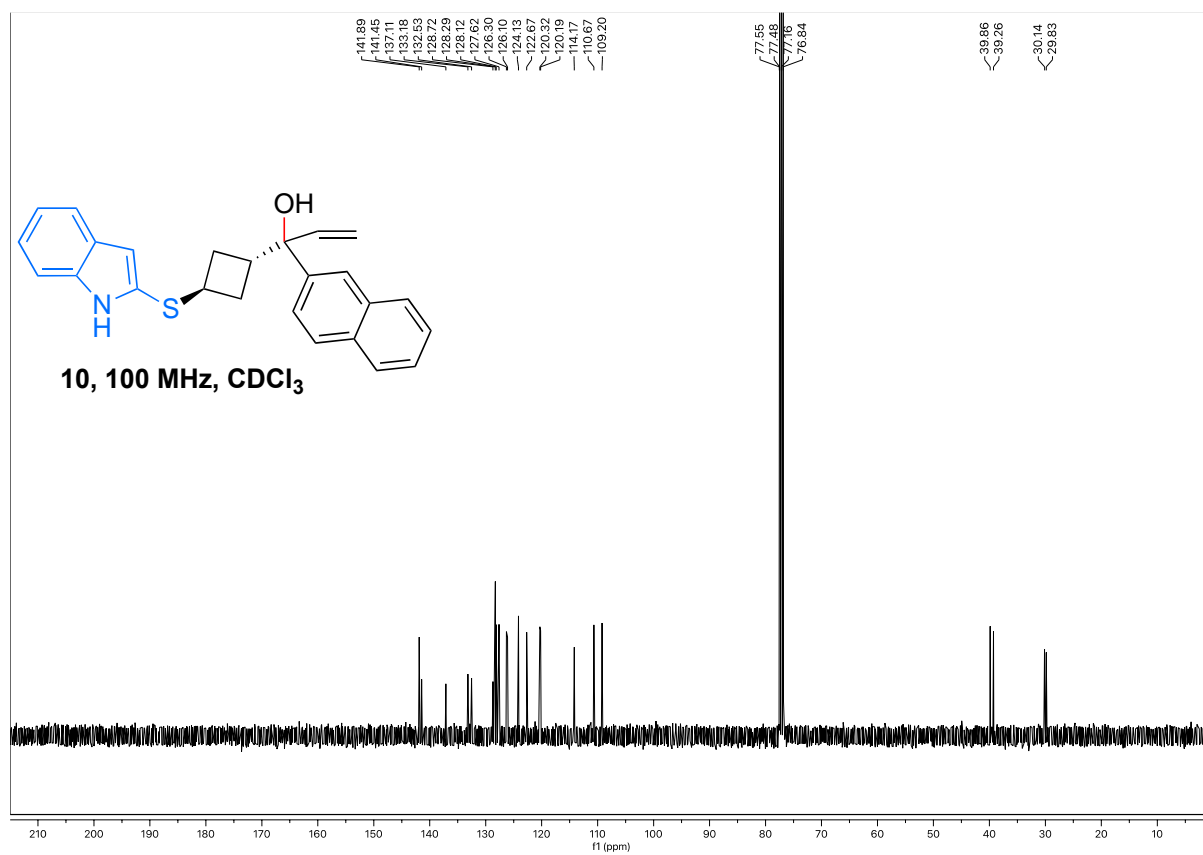

**3-(3-(3,5-Di-*tert*-butyl-4-hydroxyphenyl)(phenyl)methyl)-1*H*-indol-2-yl)thio)cyclobutyl)(naphthalen-2-yl)methanone (12)**

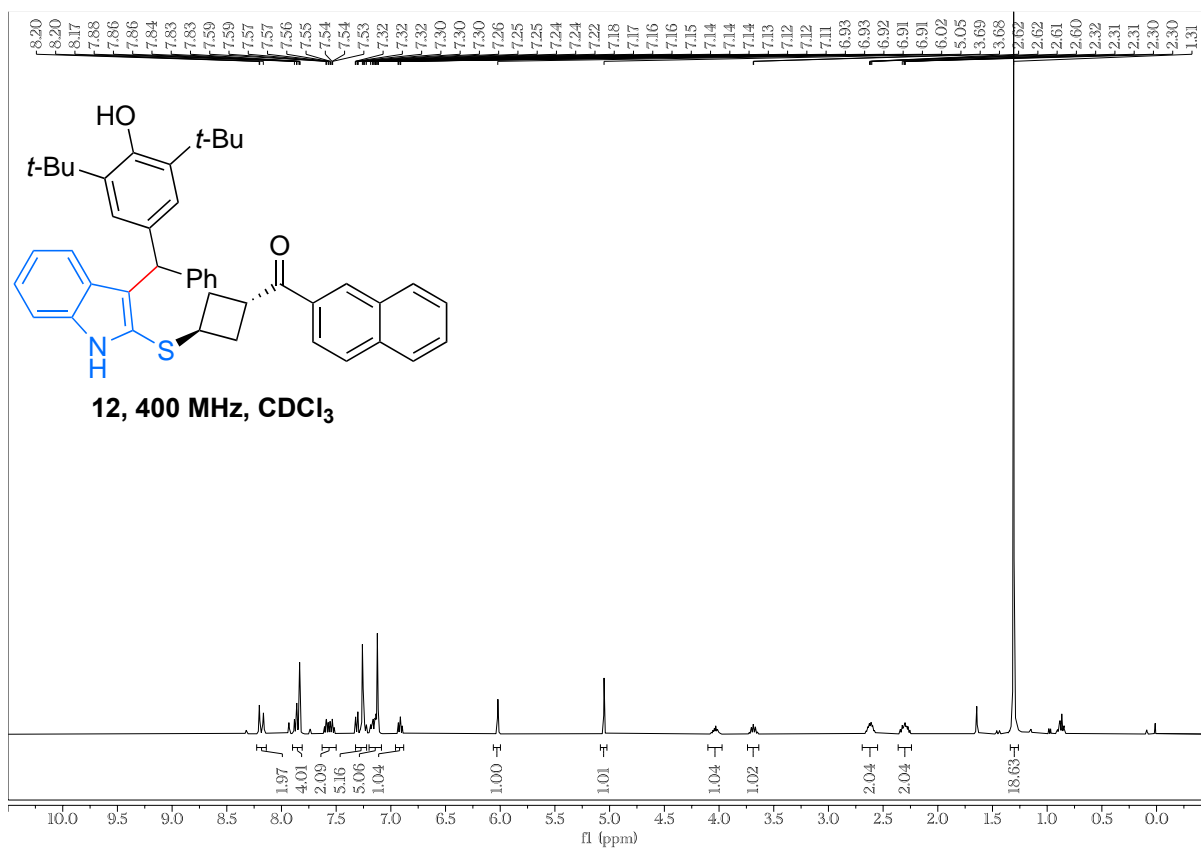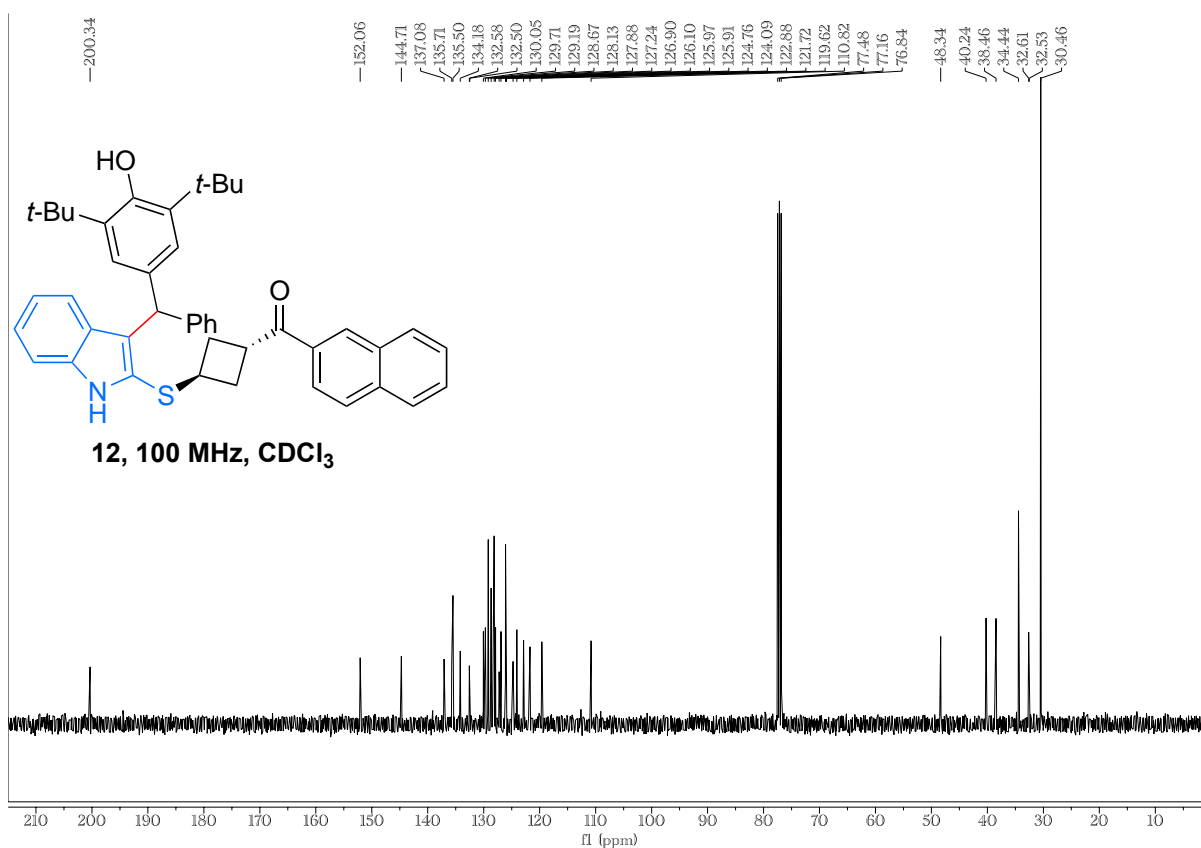



5-(((3-(2-Naphthoyl)cyclobutyl)sulfonyl)-3,4-dihydro-2H-pyrrole 1-oxide (13)

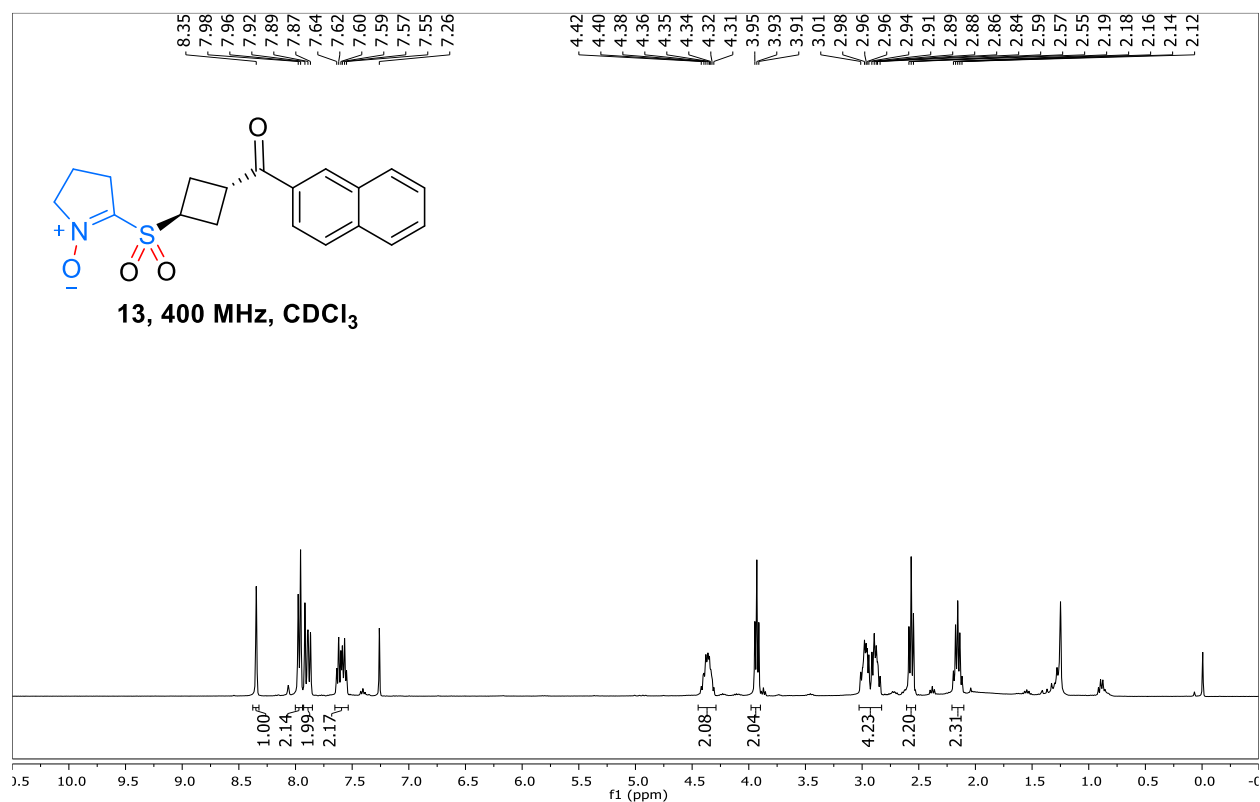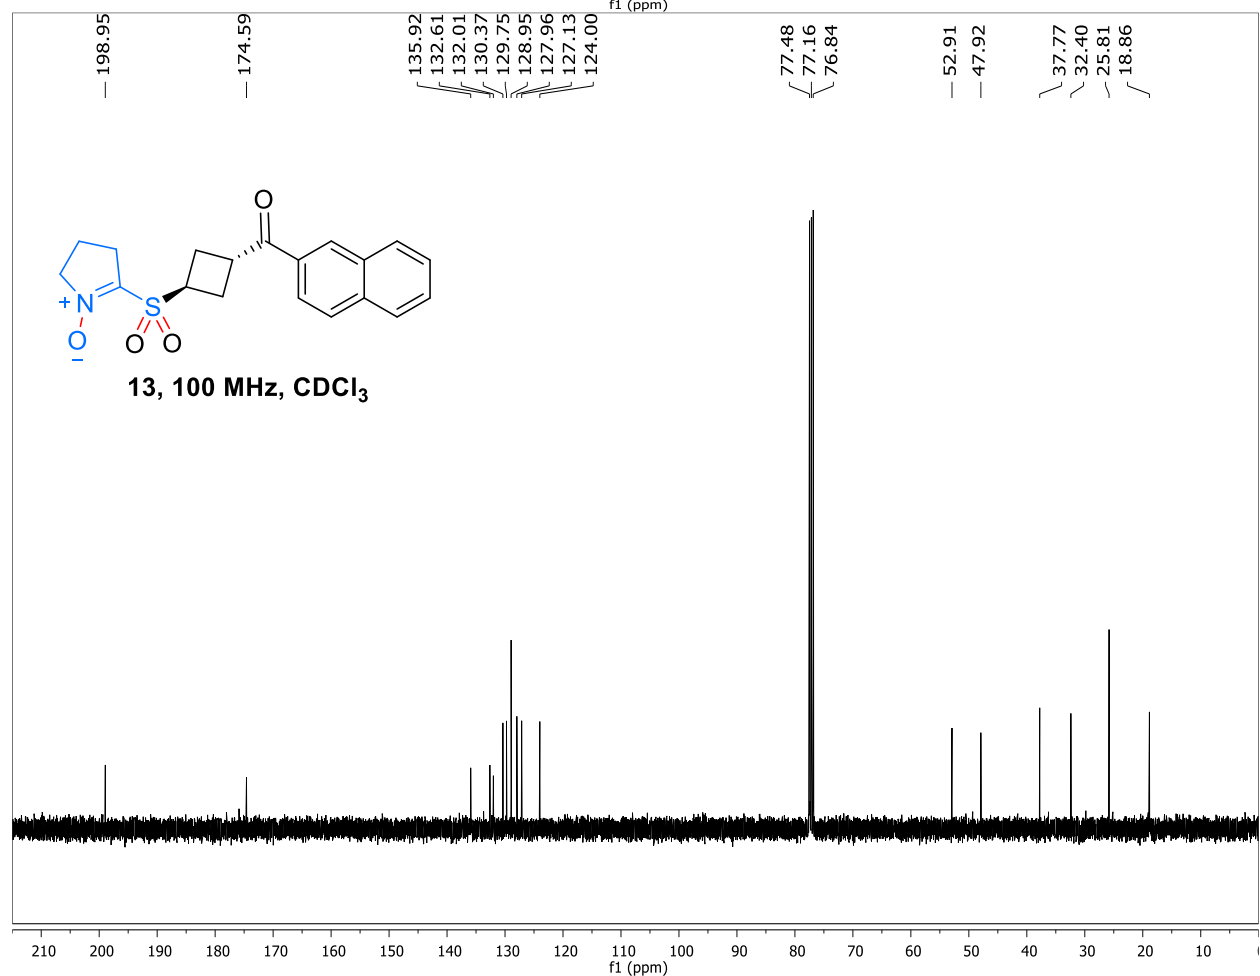

**1-(3-((3,4-Dihydro-2H-pyrrol-5-yl)thio)cyclobutyl)-1-(naphthalen-2-yl)prop-2-en-1-ol  
(5b)**

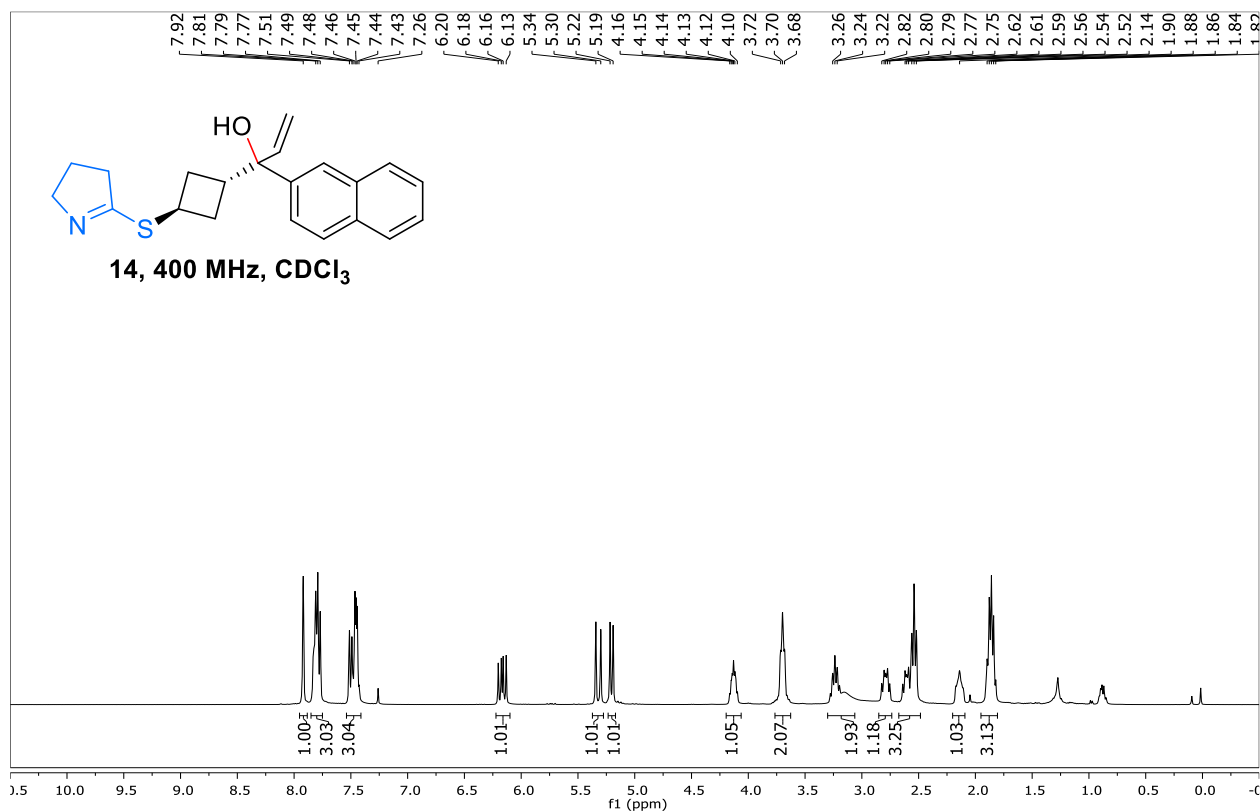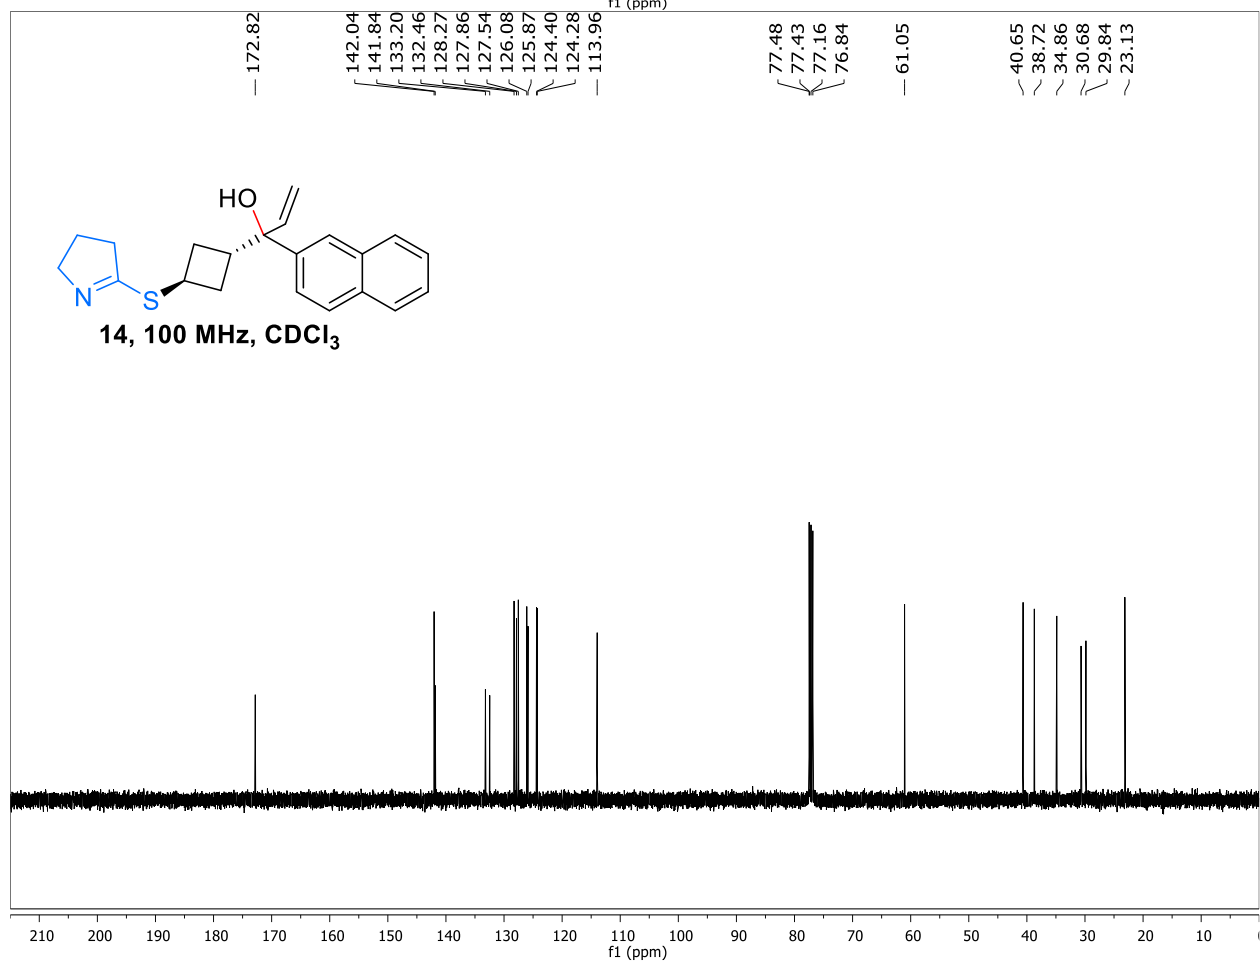

Supplement: d4sc02194k1.pdf [file d4sc02194k1.pdf]
